# Supplementary material for: Effects of gastroprotectant drugs for the prevention and treatment of peptic ulcer disease and its complications: a meta-analysis of randomised trials
Source: PubMed Central journal article supplement (PMC5842491; doi:10.1016/s2468-1253(18)30037-2), 2018-02-21
Supplement: mmc1.pdf [file mmc1.pdf]

# THE LANCET

## Gastroenterology & Hepatology

### Supplementary appendix

This appendix formed part of the original submission and has been peer reviewed. We post it as supplied by the authors.

Supplement to: Scally B, Emberson JR, Spata E, et al. Effects of gastroprotectant drugs for the prevention and treatment of peptic ulcer disease and its complications: a meta-analysis of randomised trials. *Lancet Gastroenterol Hepatol* 2018; published online Feb 20. [http://dx.doi.org/10.1016/S2468-1253\(18\)30037-2](http://dx.doi.org/10.1016/S2468-1253(18)30037-2).

# Effects of gastroprotectants for the prevention and treatment of peptic ulcer disease and its complications: meta-analysis of randomised trials

## Supplementary appendix

|                                                                                                                                                                                                             | Pg           |
|-------------------------------------------------------------------------------------------------------------------------------------------------------------------------------------------------------------|--------------|
| <b>Box: Definition of study outcomes used in the meta-analysis</b>                                                                                                                                          | <b>2</b>     |
| <b>Webfigures 1-6: Prevention Trials</b>                                                                                                                                                                    |              |
| Comparison of gastroprotectants on any endoscopic ulcer                                                                                                                                                     | 3            |
| Effects of gastroprotectants on any endoscopic ulcer                                                                                                                                                        | 4            |
| Effects of individual gastroprotectant drugs on any symptomatic ulcer                                                                                                                                       | 5            |
| Effects of gastroprotectants on bleeds                                                                                                                                                                      | 6            |
| Effects of proton pump inhibitors on endoscopic and symptomatic ulcers, bleeds and all-cause mortality, subdivided by use of NSAIDs                                                                         | 7            |
| Effects of esomeprazole, omeprazole, cimetidine and ranitidine on any endoscopic ulcer, by dose studied                                                                                                     | 8            |
| <b>Webfigures 7-9: Healing trials</b>                                                                                                                                                                       |              |
| Comparison of gastroprotectants on endoscopic ulcer healing                                                                                                                                                 | 9            |
| Effects of individual gastroprotectant drugs on endoscopic ulcer healing                                                                                                                                    | 10           |
| Effects of esomeprazole, omeprazole, cimetidine and ranitidine on endoscopic ulcers, by dose studied                                                                                                        | 11           |
| <b>Webfigures 10-12, 13a-e: Acute UGI bleeding trials</b>                                                                                                                                                   |              |
| Comparison of gastroprotectants on further bleeding, need for blood transfusion, endoscopic intervention, surgery and all-cause mortality                                                                   | 12           |
| Effects of gastroprotectants on further bleeding, need for blood transfusion, endoscopic intervention, surgery and all-cause mortality (acute UGI bleeding treatment trials of <u>peptic ulcer</u> )        | 13           |
| Effects of gastroprotectants on further bleeding, need for blood transfusion, endoscopic intervention, surgery and all-cause mortality (acute UGI bleeding treatment trials of <u>uncertain aetiology</u> ) | 14           |
| Effects of individual gastroprotectant drugs on:                                                                                                                                                            | 15-19        |
| a) further bleeding                                                                                                                                                                                         |              |
| b) blood transfusion                                                                                                                                                                                        |              |
| c) endoscopic interventions                                                                                                                                                                                 |              |
| d) surgery                                                                                                                                                                                                  |              |
| e) all-cause mortality                                                                                                                                                                                      |              |
| <b>Webfigures 14a-b: Prevention trials – effects on main outcomes by method of allocation concealment and method of blinding of investigators and patients</b>                                              | <b>20-21</b> |
| <b>Webfigures 15a-c: ‘Funnel’ plots for the main outcomes for each drug class in the prevention (15a), healing (15b) and acute UGI bleeding (15c) trials</b>                                                | <b>22-24</b> |
| <b>Webfigures 16a-i: Direct comparisons versus ‘network’ meta-analytic approach</b>                                                                                                                         | <b>25-33</b> |
| a) Prevention trials: effects on any endoscopic ulcer                                                                                                                                                       |              |
| b) Prevention trials: effects on any symptomatic ulcer                                                                                                                                                      |              |
| c) Prevention trials: effects on bleeds                                                                                                                                                                     |              |
| d) Prevention trials: effects on all-cause mortality                                                                                                                                                        |              |
| e) Healing trials: effects on endoscopic ulcer healing                                                                                                                                                      |              |
| f) Acute UGI bleeding trials: effects on further bleeding                                                                                                                                                   |              |
| g) Acute UGI bleeding trials: effects on blood transfusion                                                                                                                                                  |              |
| h) Acute UGI bleeding trials: effects on surgery                                                                                                                                                            |              |
| i) Acute UGI bleeding trials: effects on all-cause mortality                                                                                                                                                |              |
| <b>Electronic Search Strategy</b>                                                                                                                                                                           | <b>34-36</b> |
| <b>Webtables 1-7: Full list of eligible trials, with references</b>                                                                                                                                         | <b>37-91</b> |

## Box. Definitions of study outcomes used in the meta-analysis

| <b>Trial population</b>             | <b>Outcome</b>           | <b>Summary of trialists' definitions</b>                                                                                                                  |
|-------------------------------------|--------------------------|-----------------------------------------------------------------------------------------------------------------------------------------------------------|
| <b>Prevention</b>                   | Endoscopic ulcers        | Lesions $\geq 5$ mm (or $\geq 3$ mm in older studies). Perception of 'depth' within lesion at endoscopy.                                                  |
|                                     | Symptomatic ulcers       | Any subjective clinical symptoms that a clinician may associate with peptic ulcer disease. Commonly described symptoms were dyspepsia or epigastric pain. |
|                                     | Bleeding                 | Based on a range of clinical, biochemical and endoscopic parameters.                                                                                      |
|                                     | Perforation              | Based on clinical assessment, usually including imaging with erect chest x-ray.                                                                           |
|                                     | Obstruction              | Based on clinical assessment.                                                                                                                             |
|                                     | All-cause mortality      | Death from any cause                                                                                                                                      |
| <b>Healing</b>                      | Endoscopic ulcer healing | Endoscopic evidence of complete healing. Changes of scarring and mucosal regeneration were accepted as evidence of healing.                               |
|                                     | All-cause mortality      | Death from any cause                                                                                                                                      |
| <b>Acute UGI bleeding treatment</b> | Further bleeding         | Failure to establish initial haemostasis or any episode of upper gastrointestinal bleeding that occurred after initial haemostasis was established        |
|                                     | Blood transfusion        | Any requirement for patients to receive red blood cell transfusion                                                                                        |
|                                     | Endoscopic interventions | Any further endoscopic interventions that were performed after initial haemostasis was established                                                        |
|                                     | Surgery                  | Any surgical interventions that were performed after initial haemostasis was established                                                                  |
|                                     | All-cause mortality      | Death from any cause                                                                                                                                      |

**Webfigure 1: Prevention trials – comparison of gastroprotectants on any endoscopic ulcer**

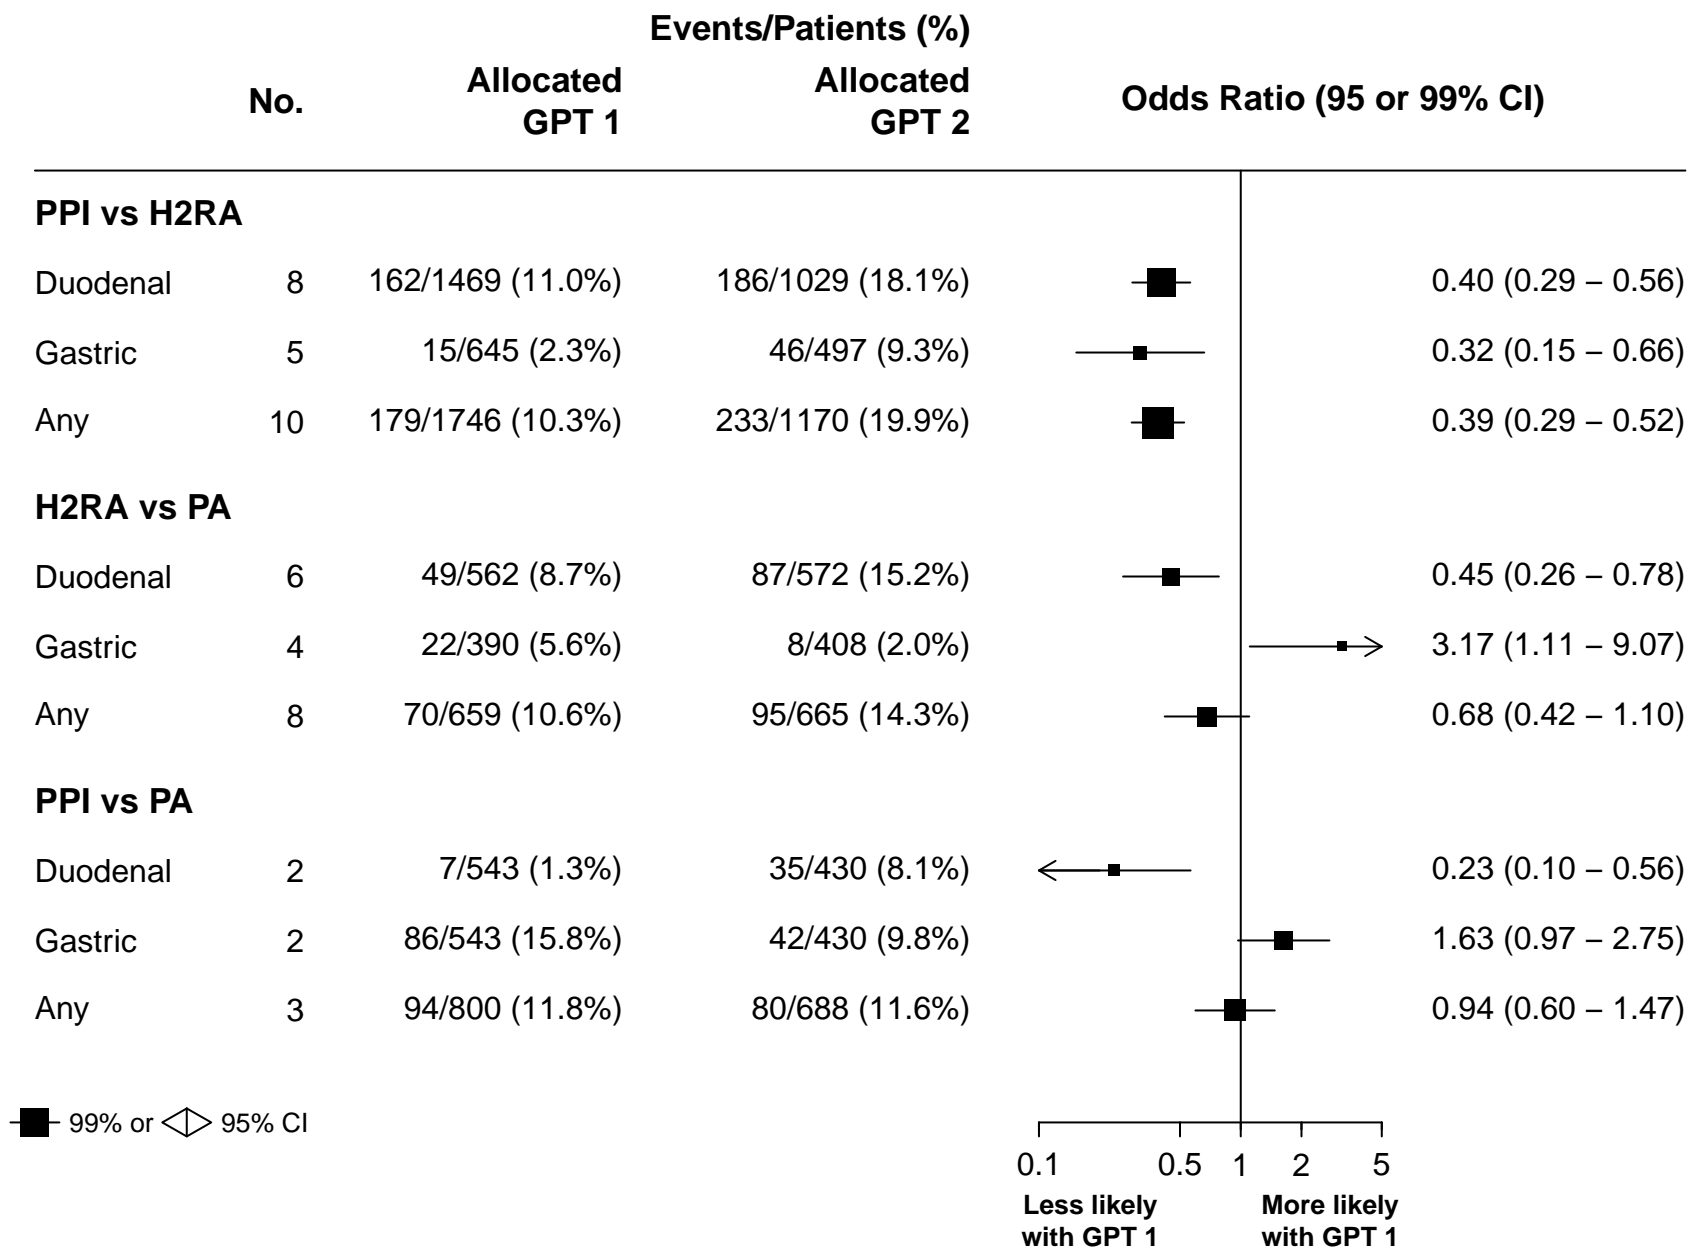

PPI=Proton pump inhibitors, PA=Prostaglandin analogues, H2RA=Histamine-2 receptor antagonists

There was one trial comparing PA + H2RA versus H2RA (misoprostol + ranitidine vs ranitidine) with 3/25 vs 14/28 endoscopic ulcers.

**Webfigure 2: Prevention trials – effects of gastroprotectants on any endoscopic ulcer**

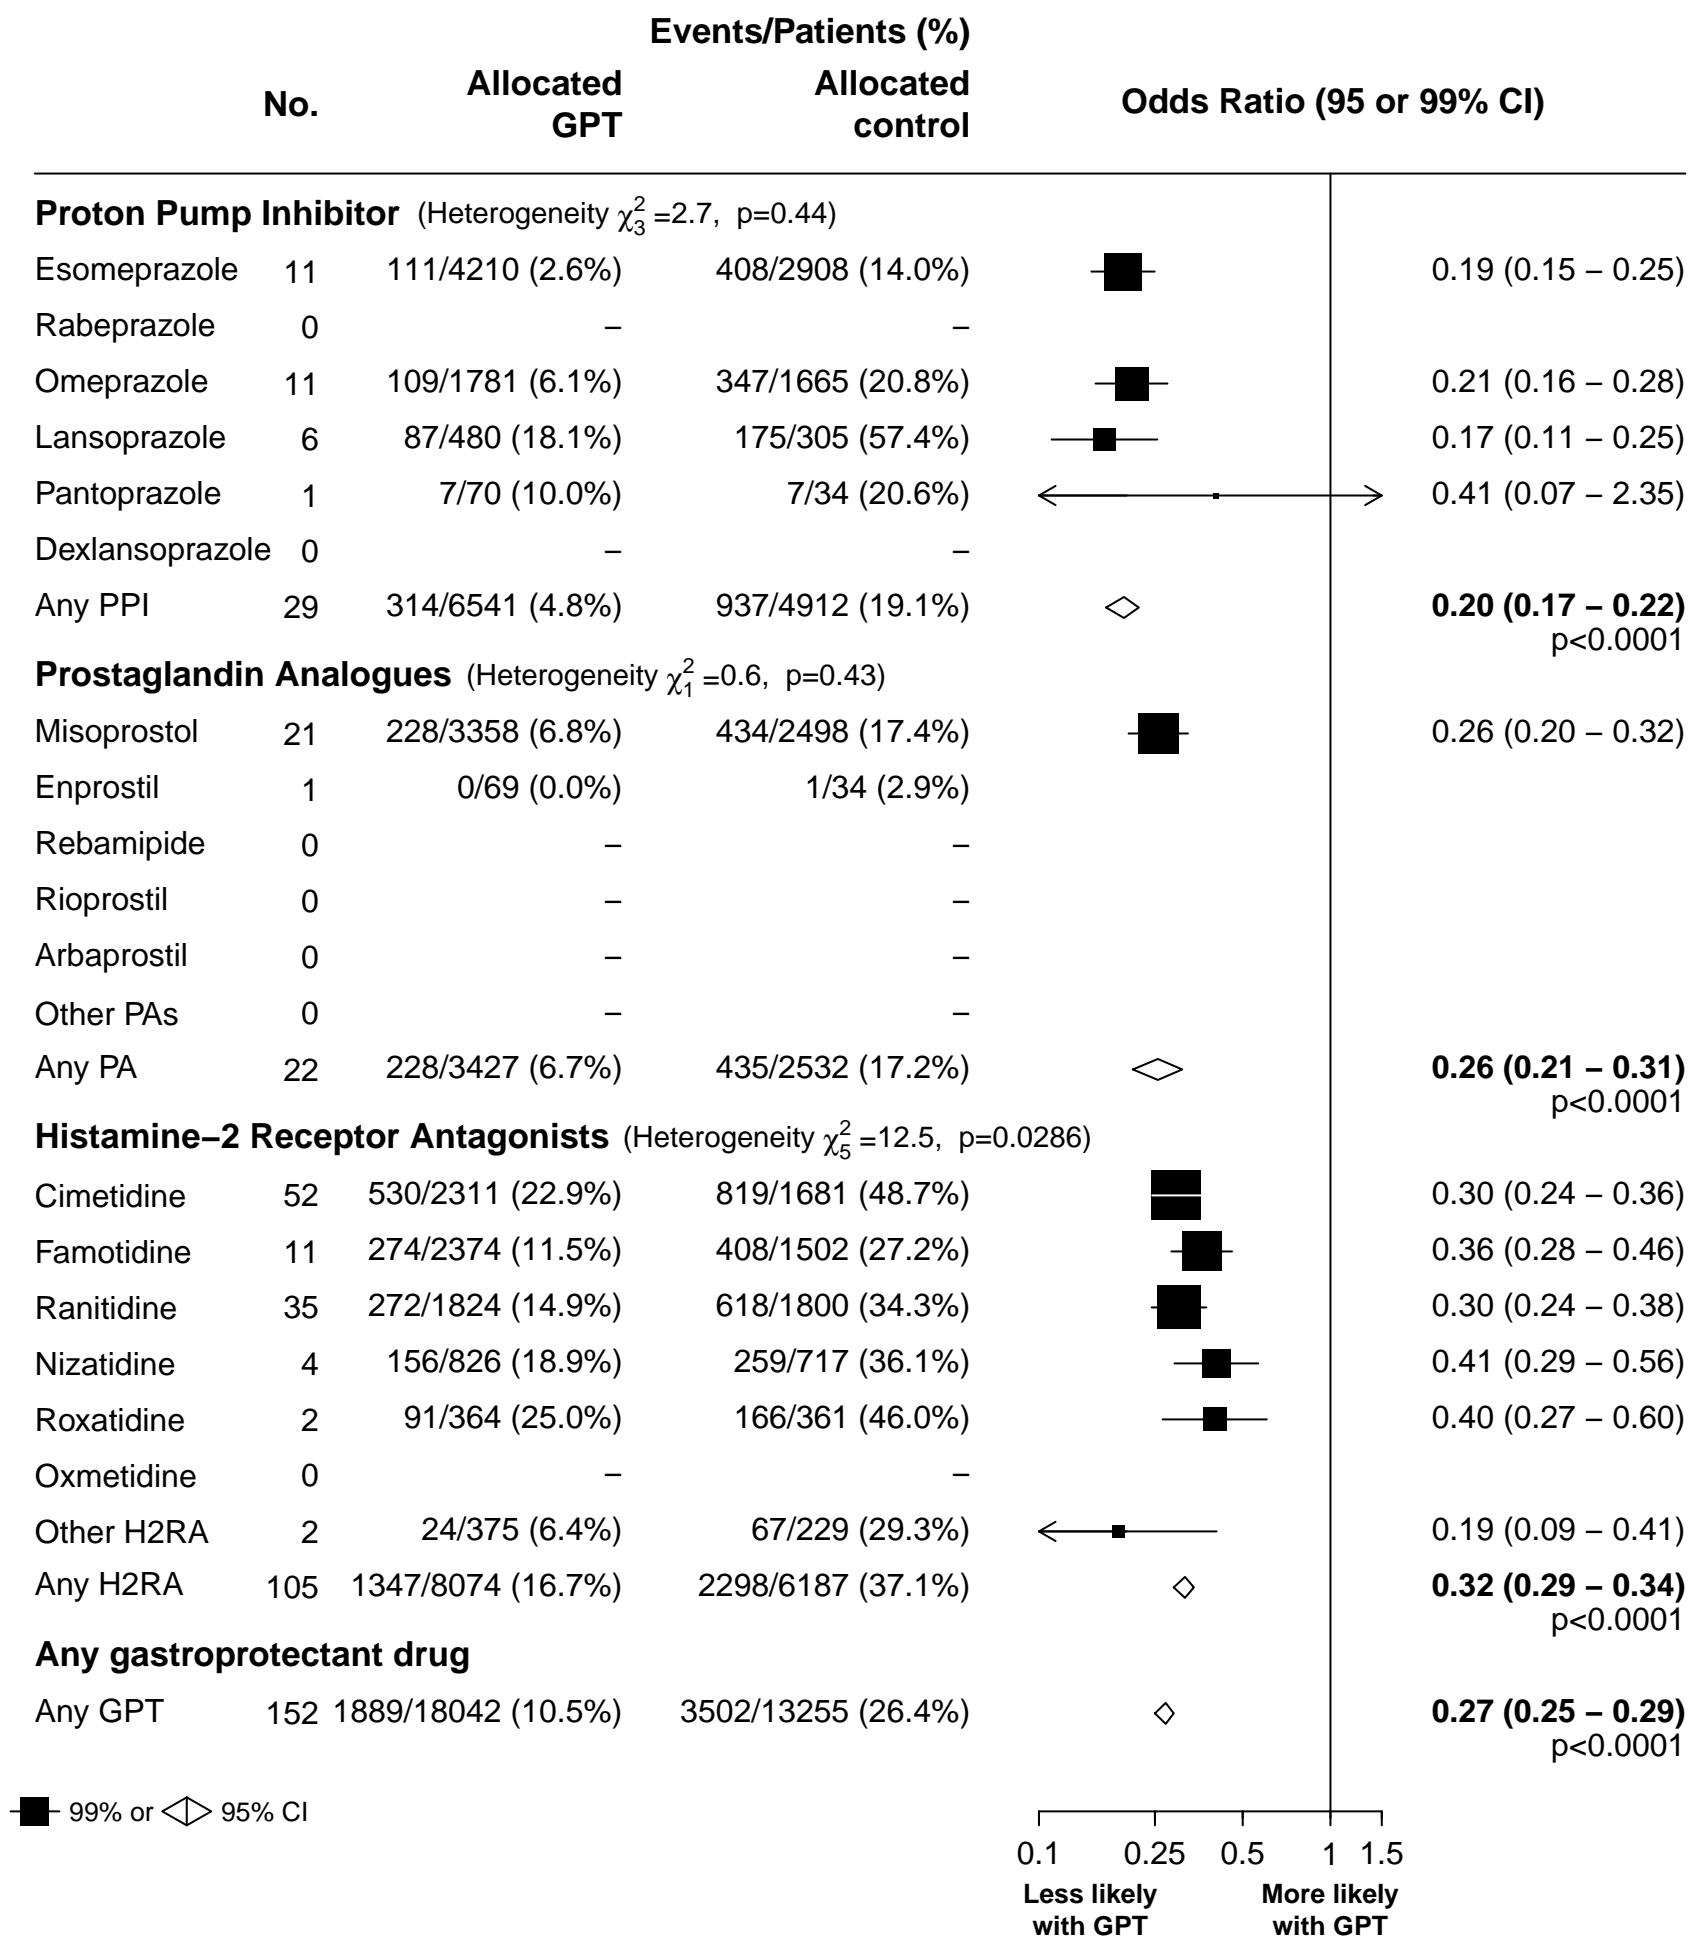

PPI=Proton pump inhibitors, PA=Prostaglandin analogues, H2RA=Histamine–2 receptor antagonists, GPT=Gastroprotectant drug

**Webfigure 3: Prevention trials – effects of individual gastroprotectant drugs on any symptomatic ulcer**

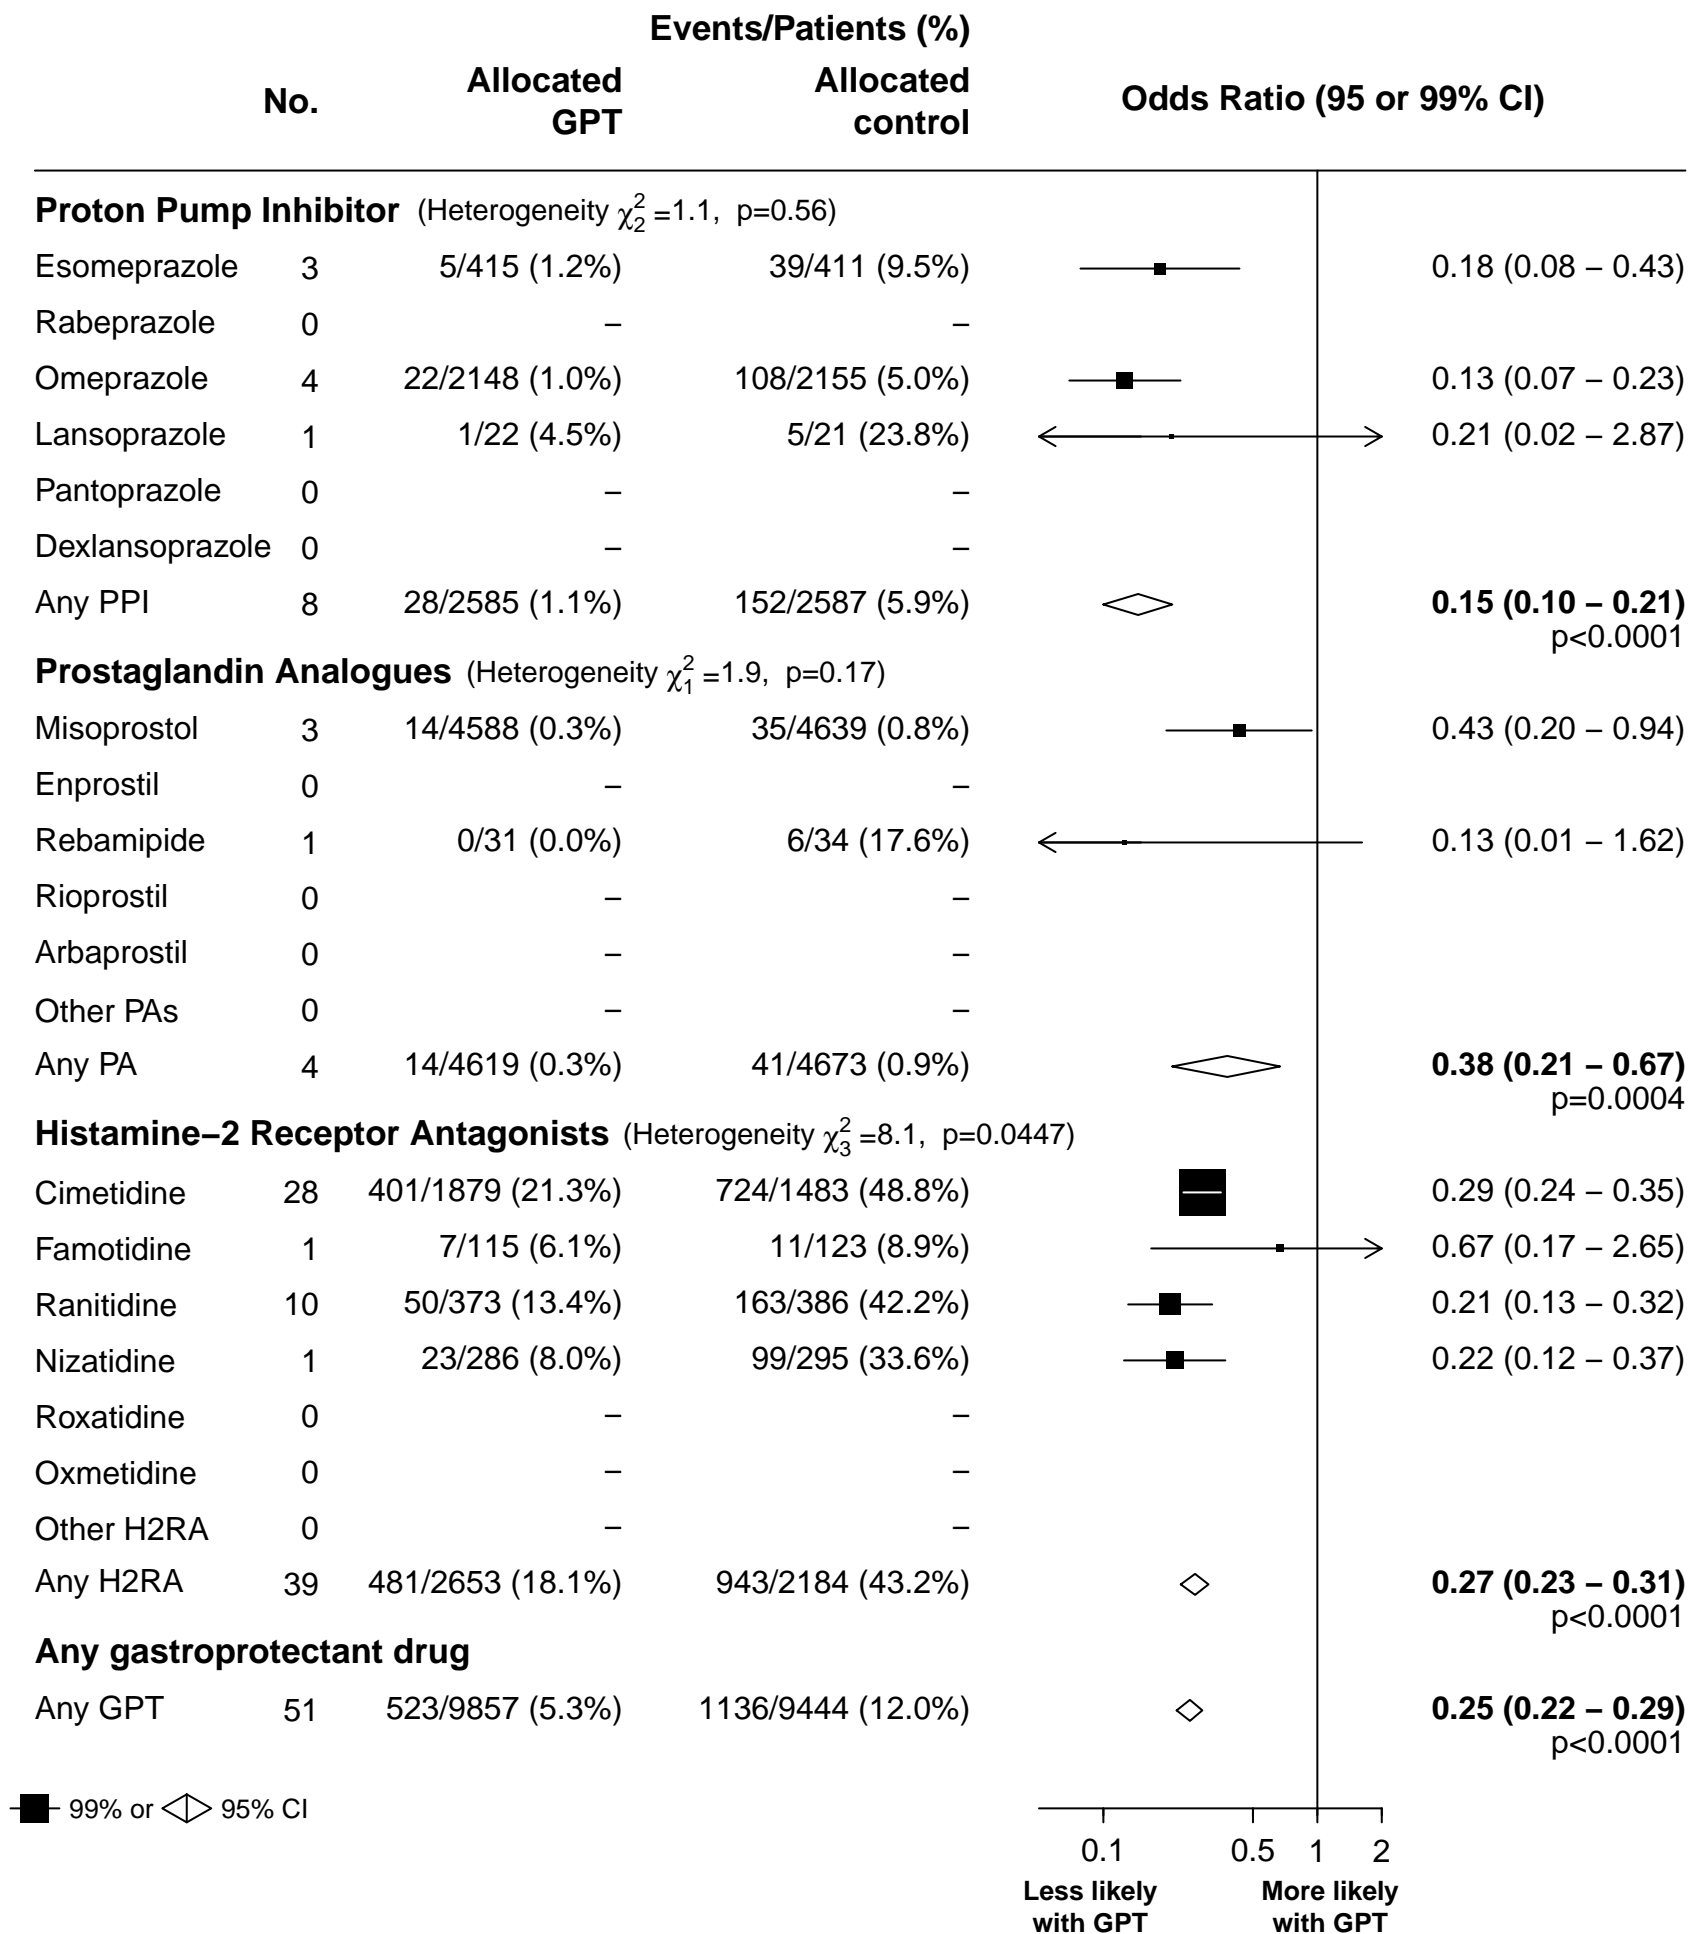

PPI=Proton pump inhibitors, PA=Prostaglandin analogues, H2RA=Histamine–2 receptor antagonists, GPT=Gastroprotectant drug

**Webfigure 4: Prevention trials – effects of gastroprotectants on bleeds**

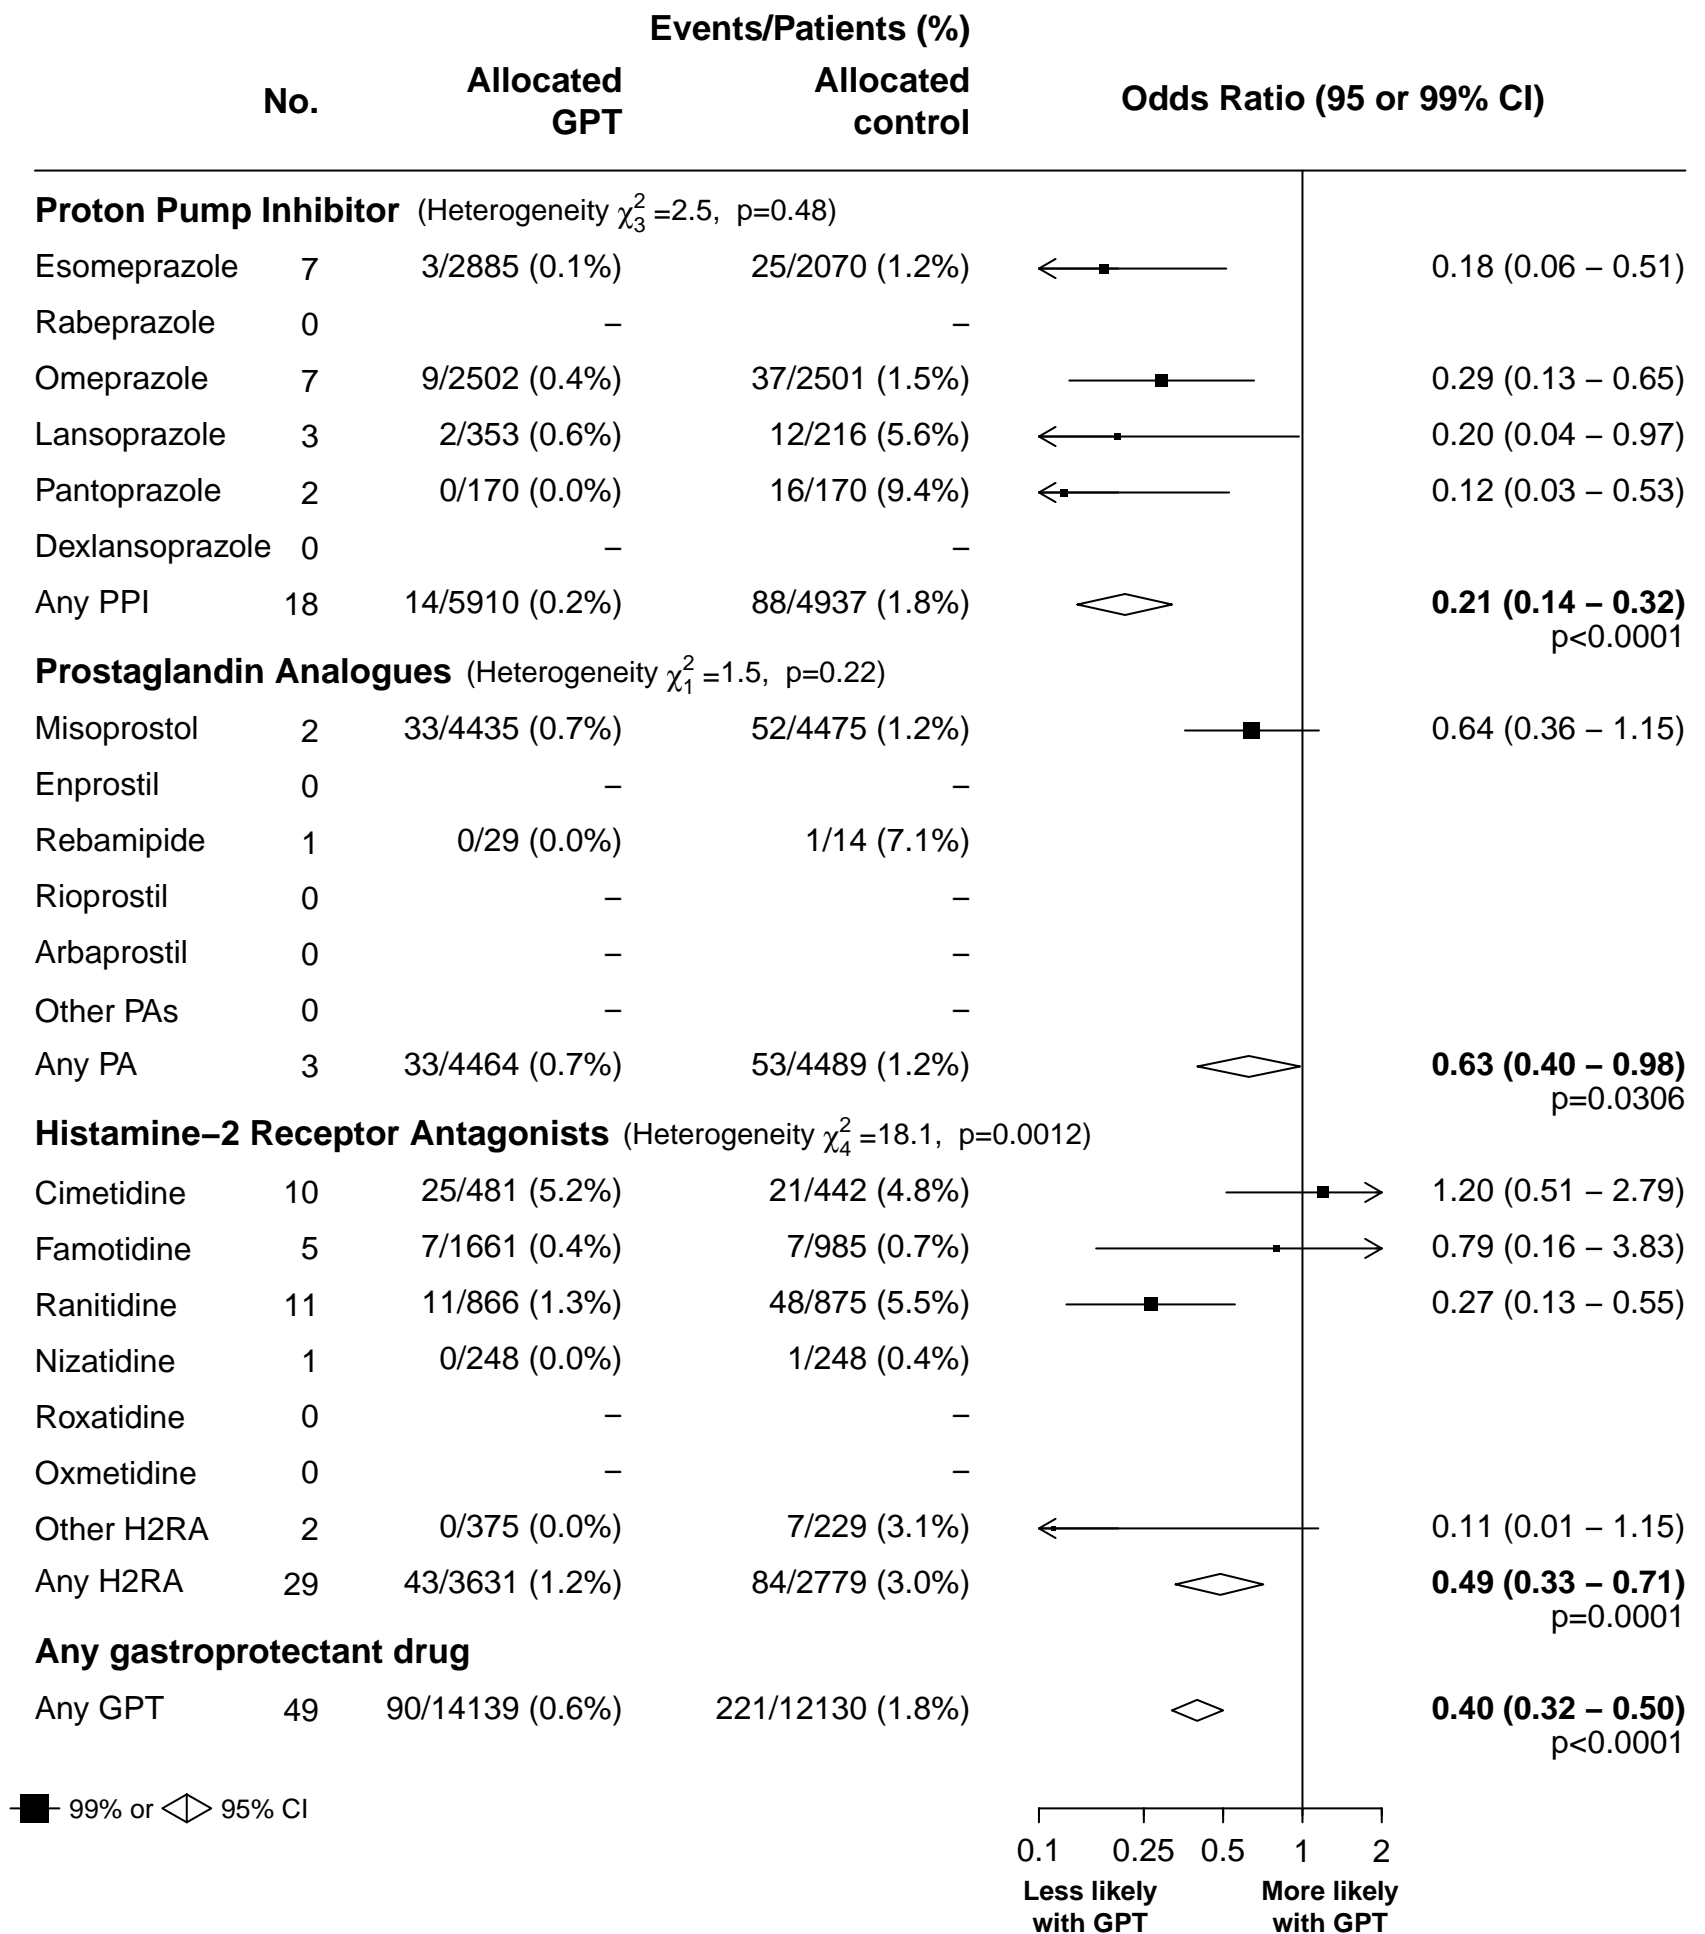

PPI=Proton pump inhibitors, PA=Prostaglandin analogues, H2RA=Histamine–2 receptor antagonists, GPT=Gastroprotectant drug

**Webfigure 5: Prevention trials – effects of proton pump inhibitors on endoscopic and symptomatic ulcers, bleeds and all-cause mortality, subdivided by use of NSAIDs**

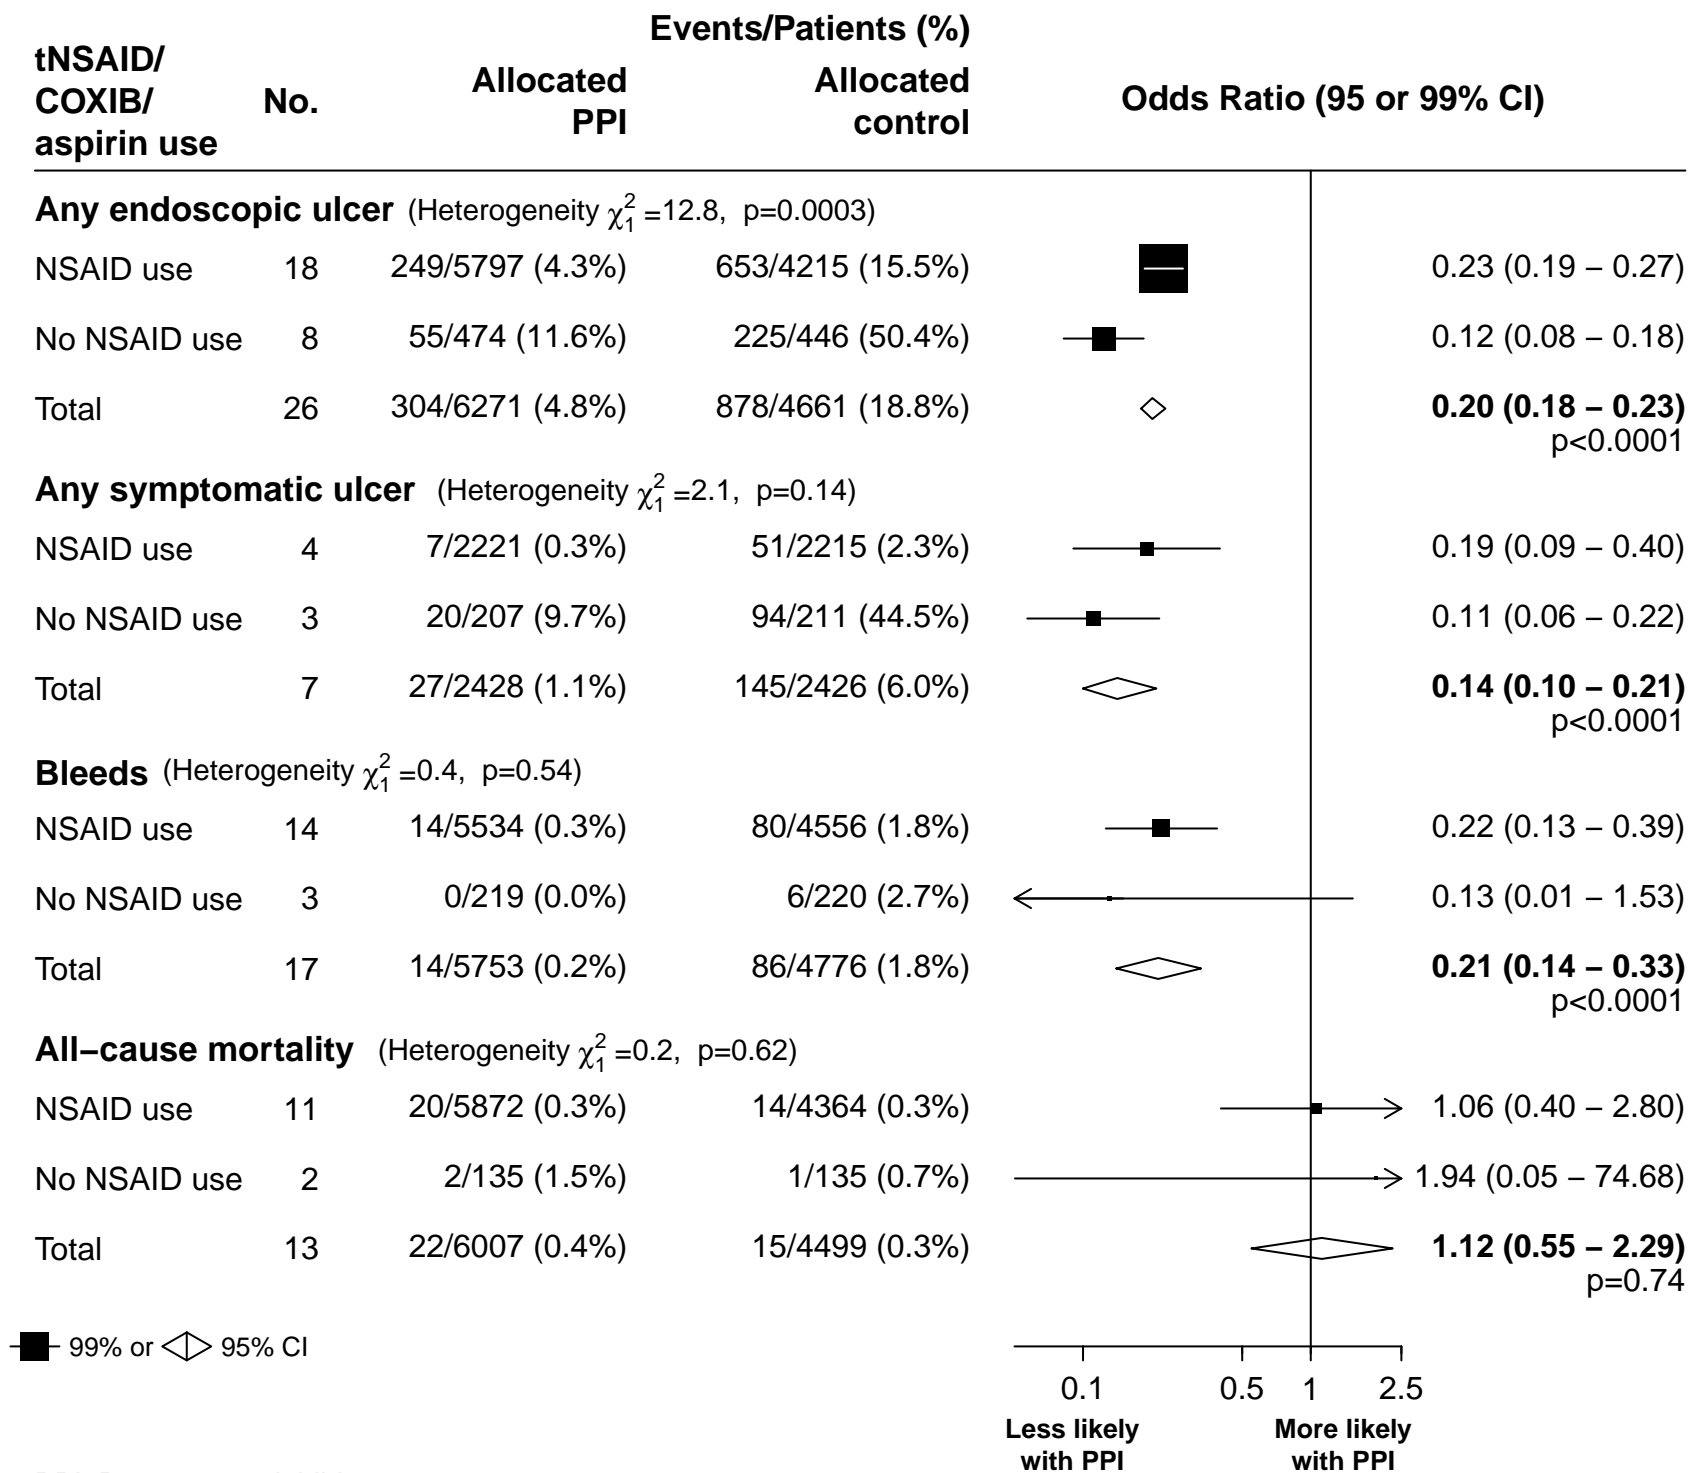

**Trial categorization:**

NSAID use: greater than or equal to 80% of patients took a tNSAID, COXIB or aspirin.

No NSAID use: less than 80% of patients took a tNSAID, COXIB or aspirin.

The results for trials in which information about NSAID use at baseline was unavailable were similar to those with data available: any endoscopic ulcer RR=0.12 (0.06–0.25) unavailable vs 0.20 (0.18–0.23) available; any symptomatic ulcer RR=0.14 (0.03–1.80) unavailable vs 0.14 (0.10–0.21) available; bleeds no data for unavailable; all-cause mortality RR=0.87 (0.28–2.75) unavailable vs 1.12 (0.55–2.29) available.



**Webfigure 6: Prevention trials – effects of esomeprazole, omeprazole, cimetidine and ranitidine on any endoscopic ulcer, by dose studied**

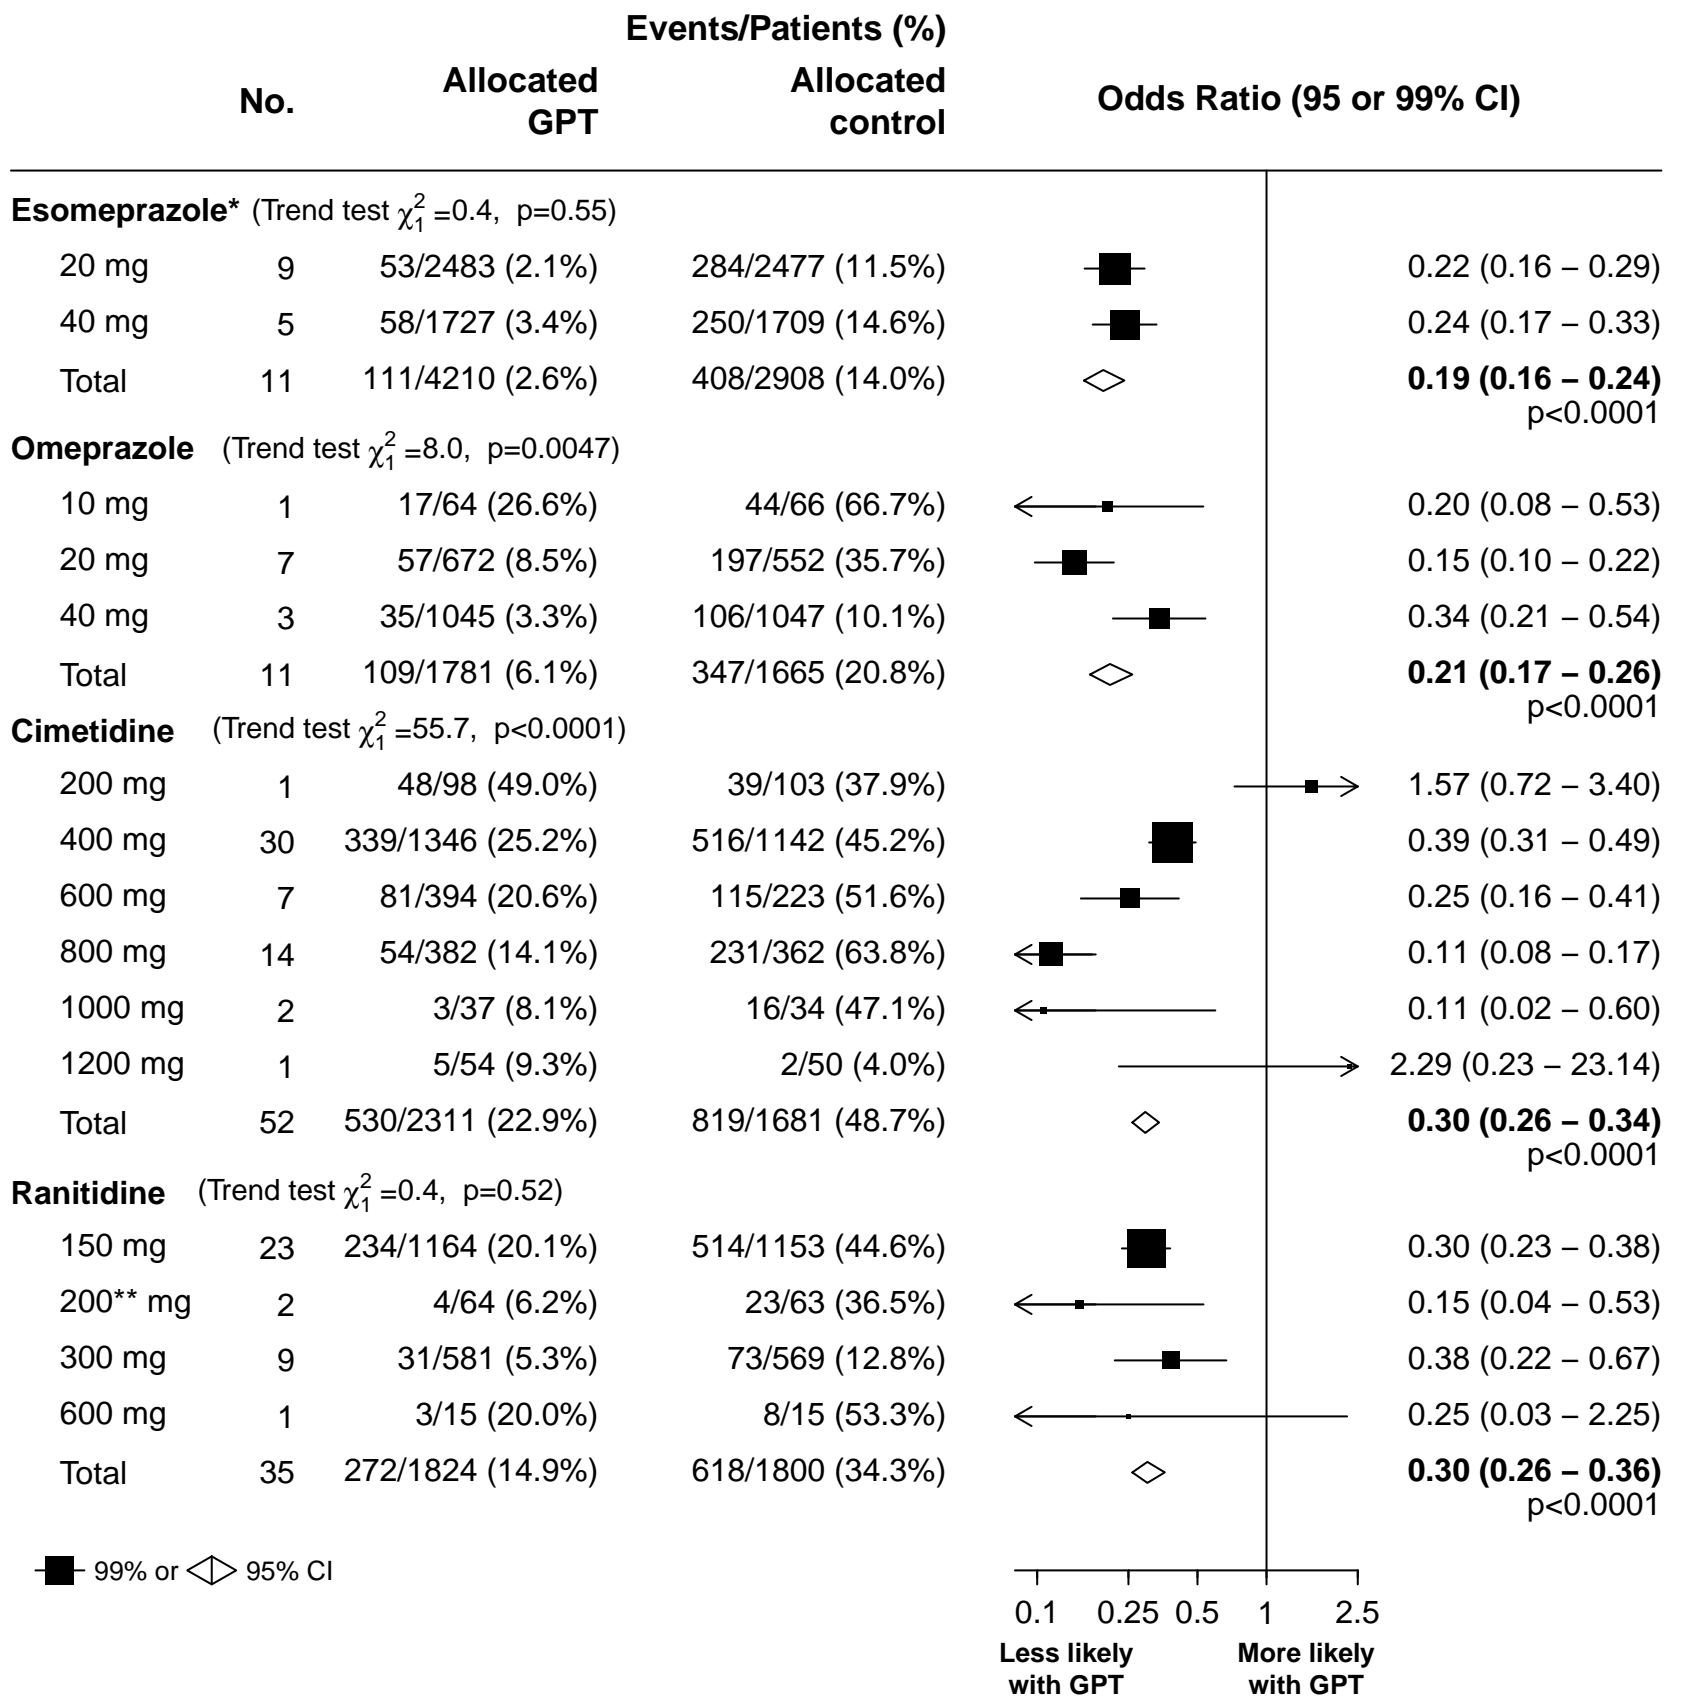

\*Some trials involve 20mg vs 40mg vs control, which happened to lead both dose-specific estimates being less extreme than the overall estimate.

\*\*Penston (1993) trial was included in this dose group which reported a ranitidine dose of 225 mg.

## Webfigure 7: Healing trials – comparison of gastroprotectants on endoscopic ulcer healing

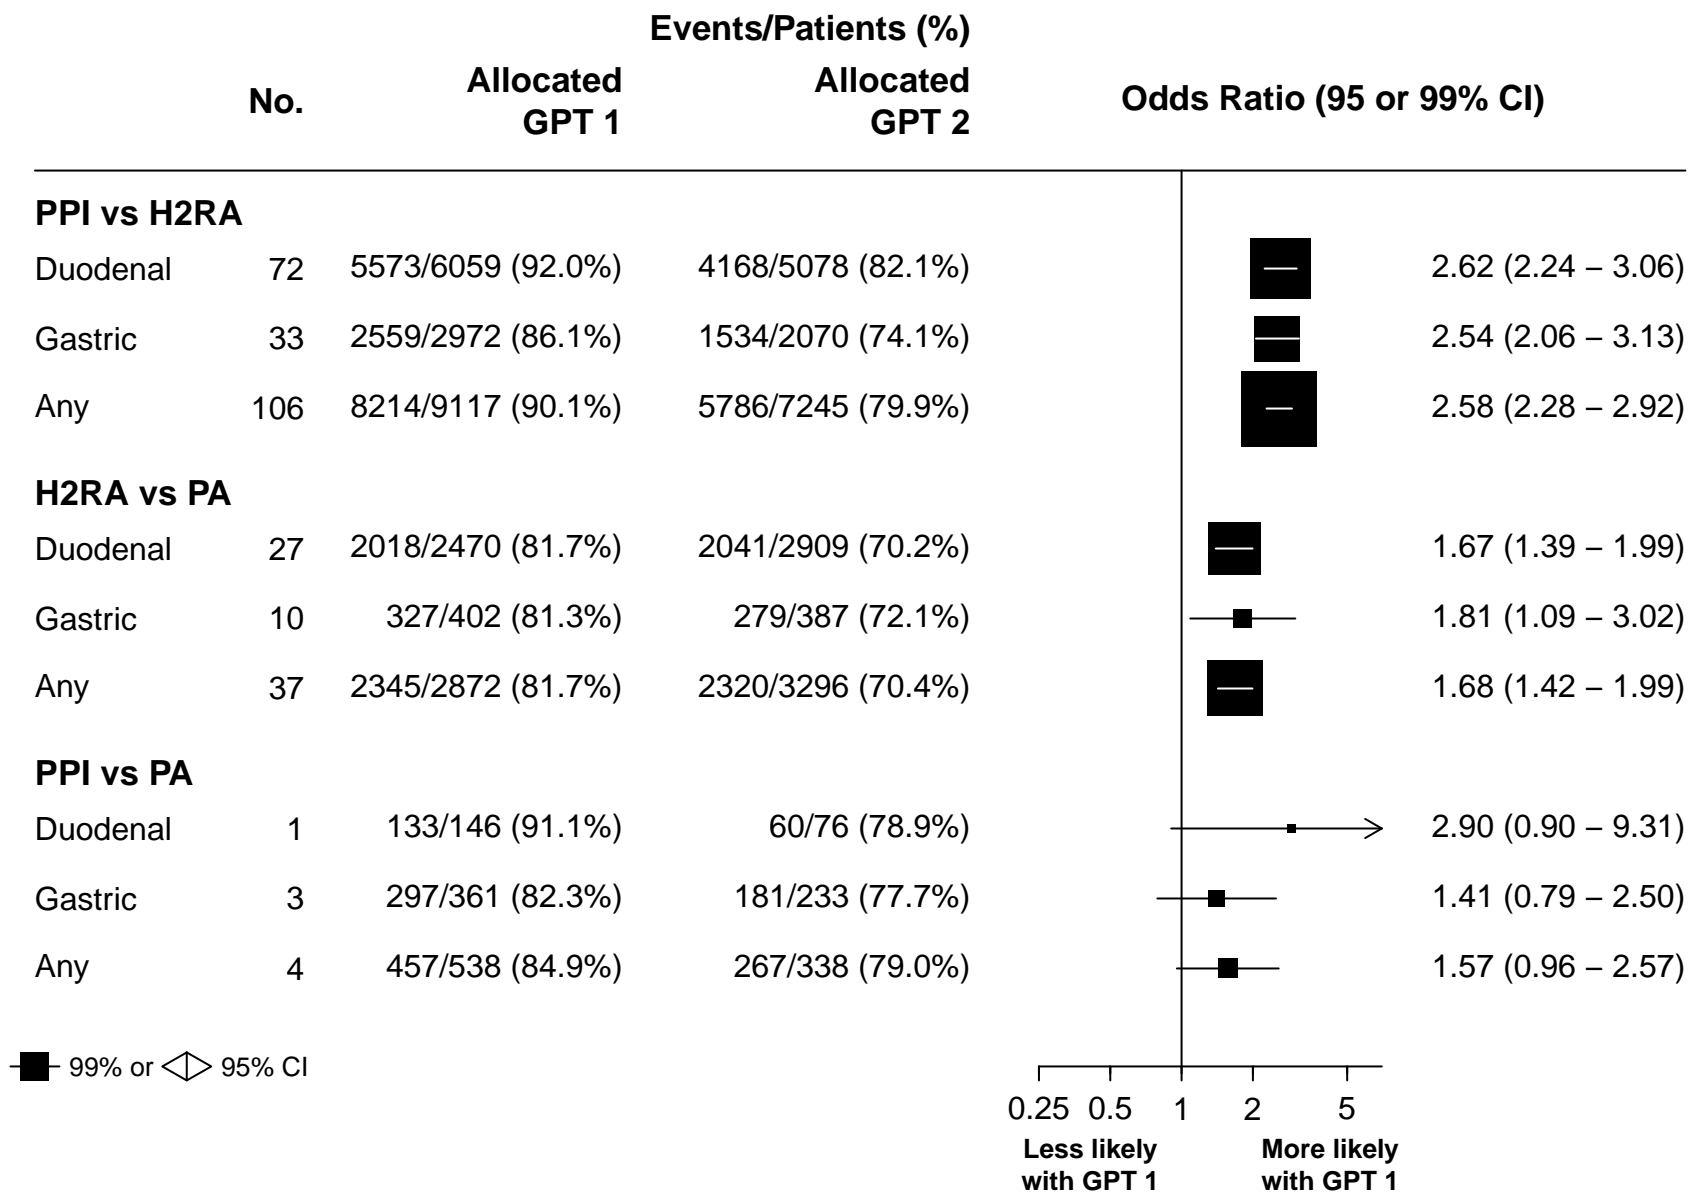

PPI=Proton pump inhibitors, PA=Prostaglandin analogues, H2RA=Histamine-2 receptor antagonists

There was one trial comparing PA + H2RA versus H2RA with 76/82 vs 59/84 endoscopic ulcers.  
 Two additional trials compared PA + PPI versus PPI with a total of 36/130 vs 19/127 endoscopic ulcers.

## Webfigure 8: Healing trials – effects of individual gastroprotectant drugs on endoscopic ulcer healing

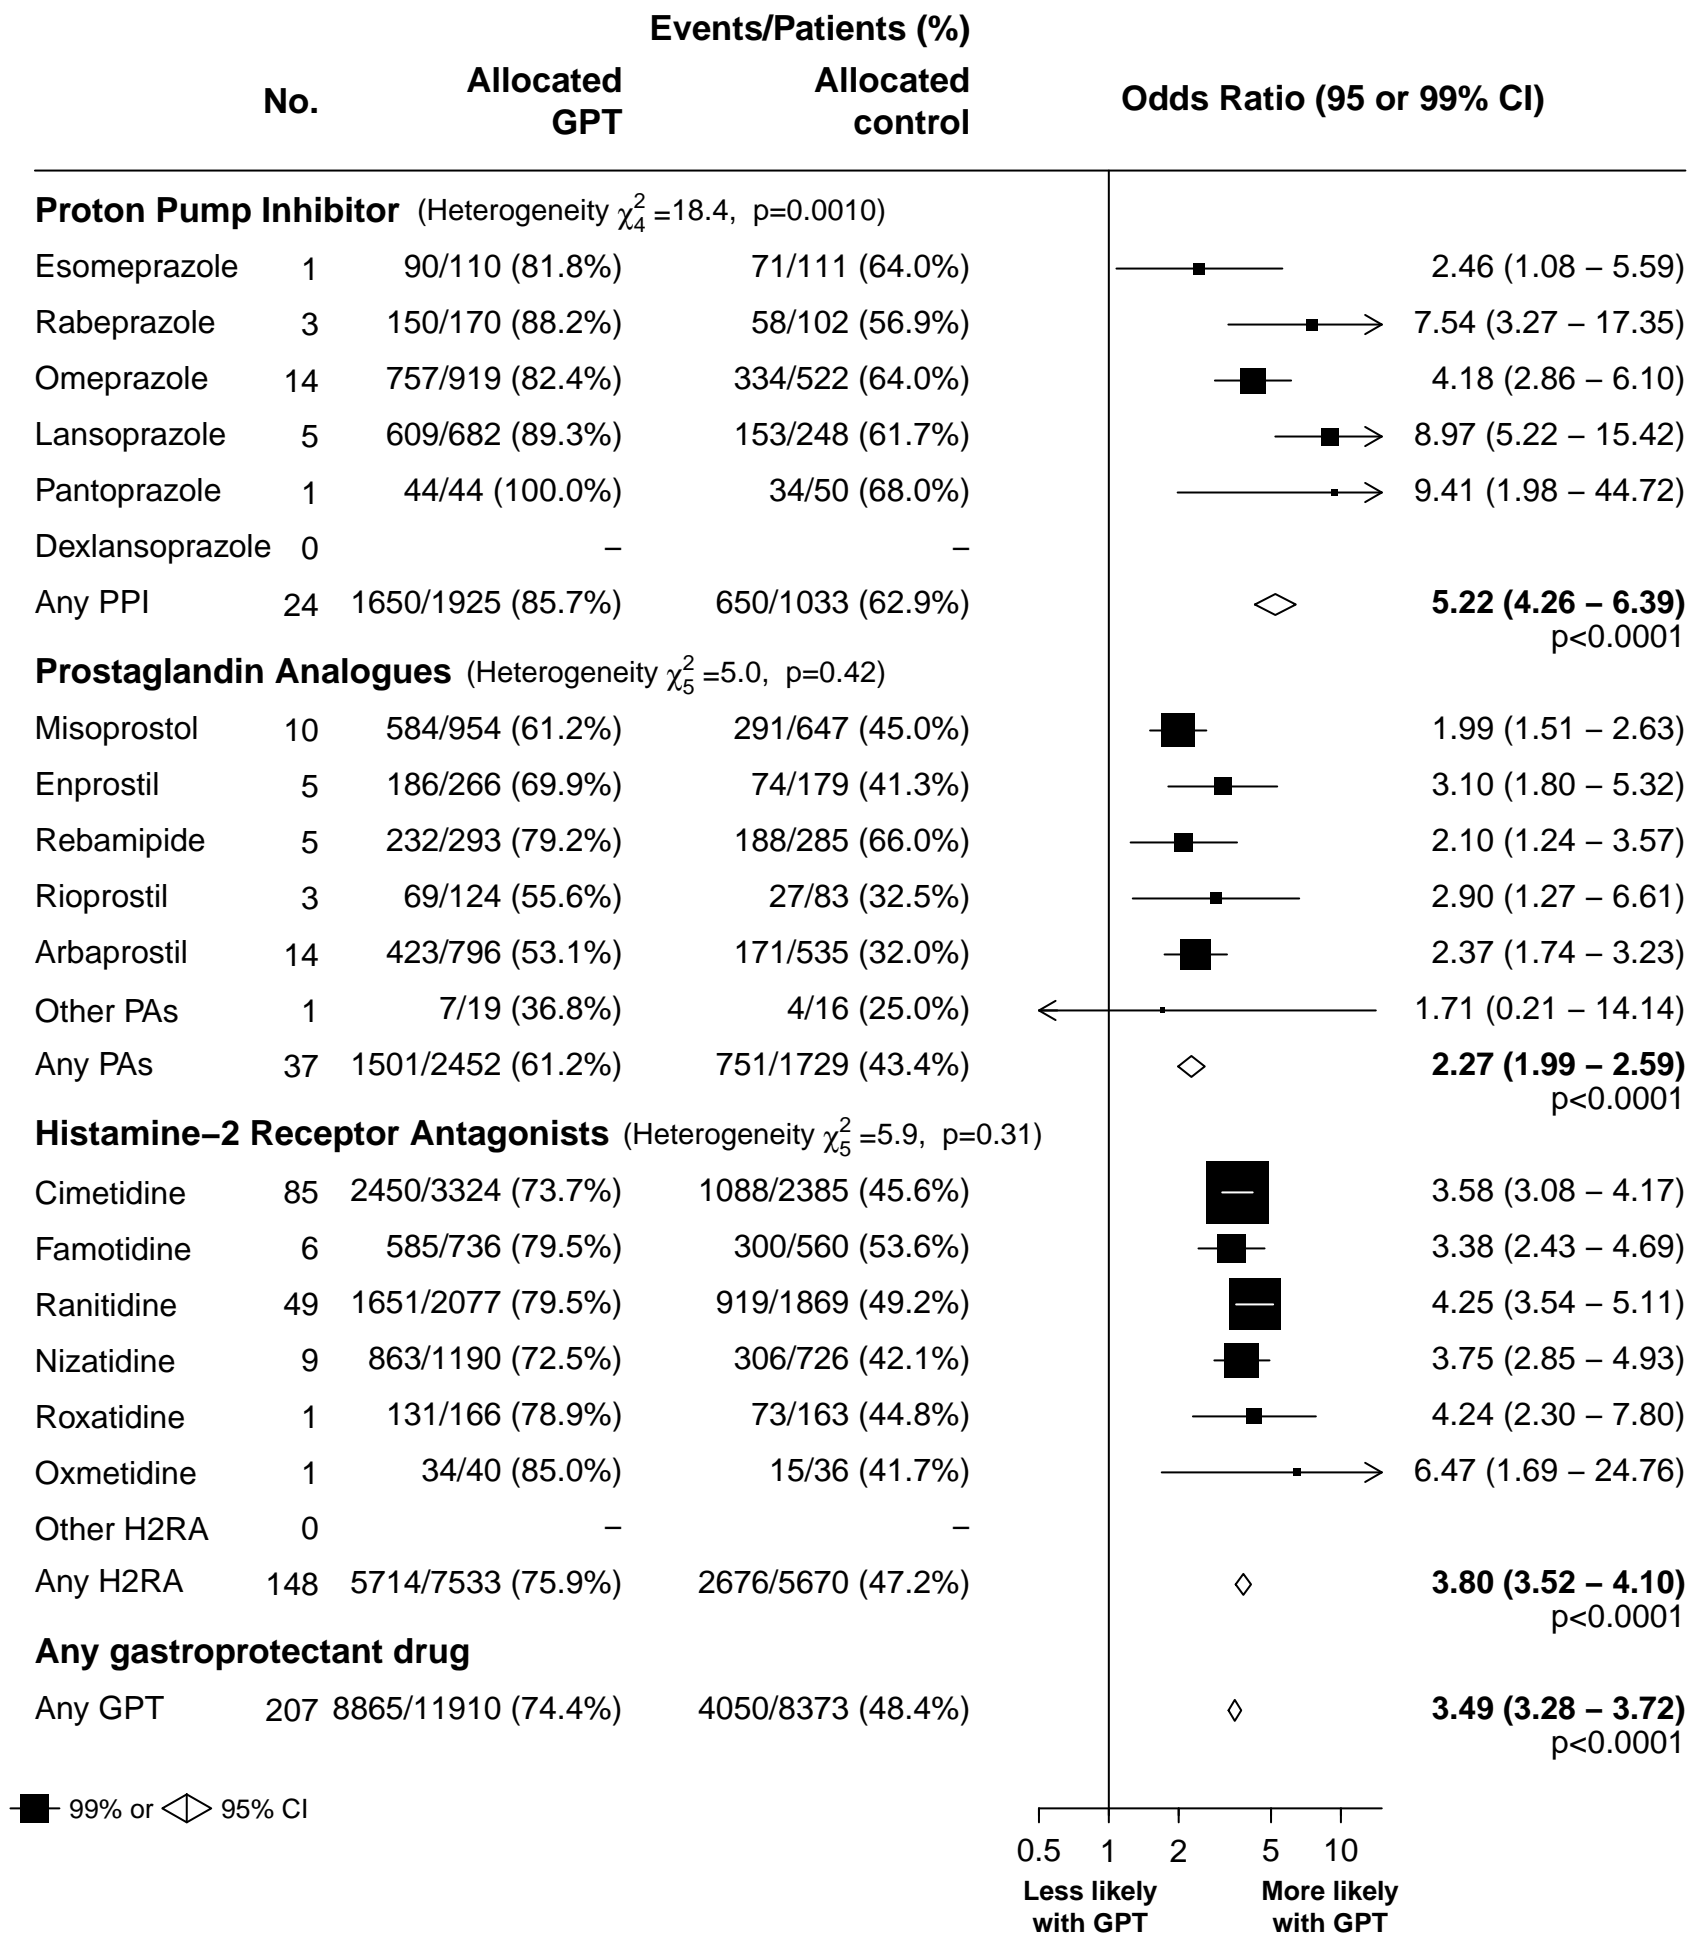

PPI=Proton pump inhibitors, PA=Prostaglandin analogues, H2RA=Histamine–2 receptor antagonists, GPT=Gastroprotectant drug

**Webfigure 9: Healing trials – effects of esomeprazole, omeprazole, cimetidine and ranitidine on endoscopic ulcers, by dose studied**

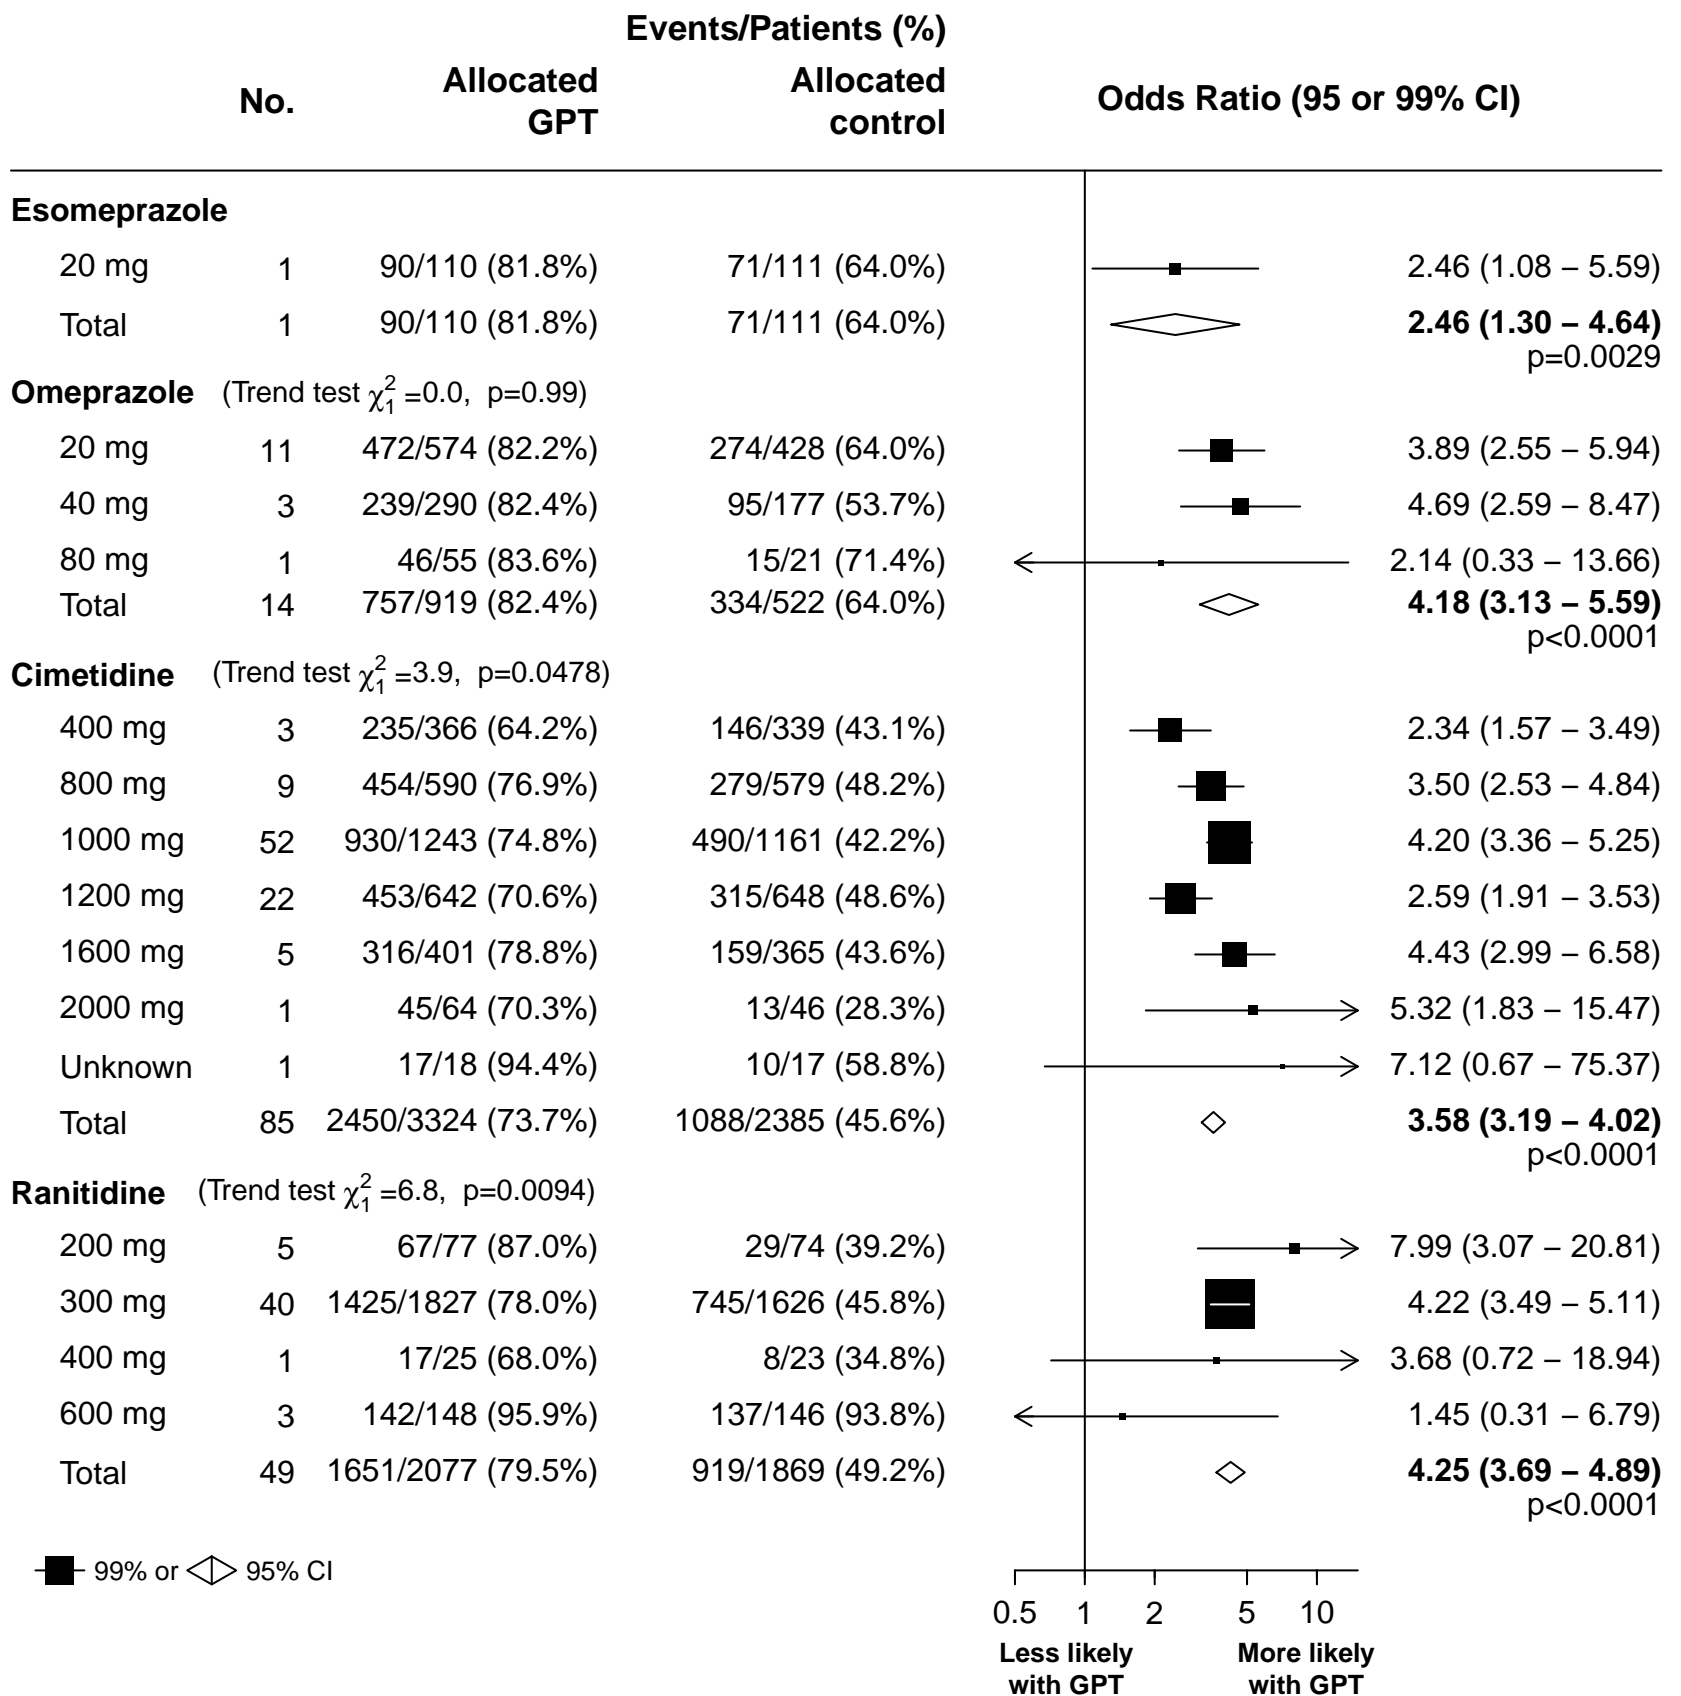

**Webfigure 10: Acute UGI bleeding treatment trials – comparison of gastroprotectants on further bleeding, need for blood transfusion, endoscopic intervention, surgery and all-cause mortality**

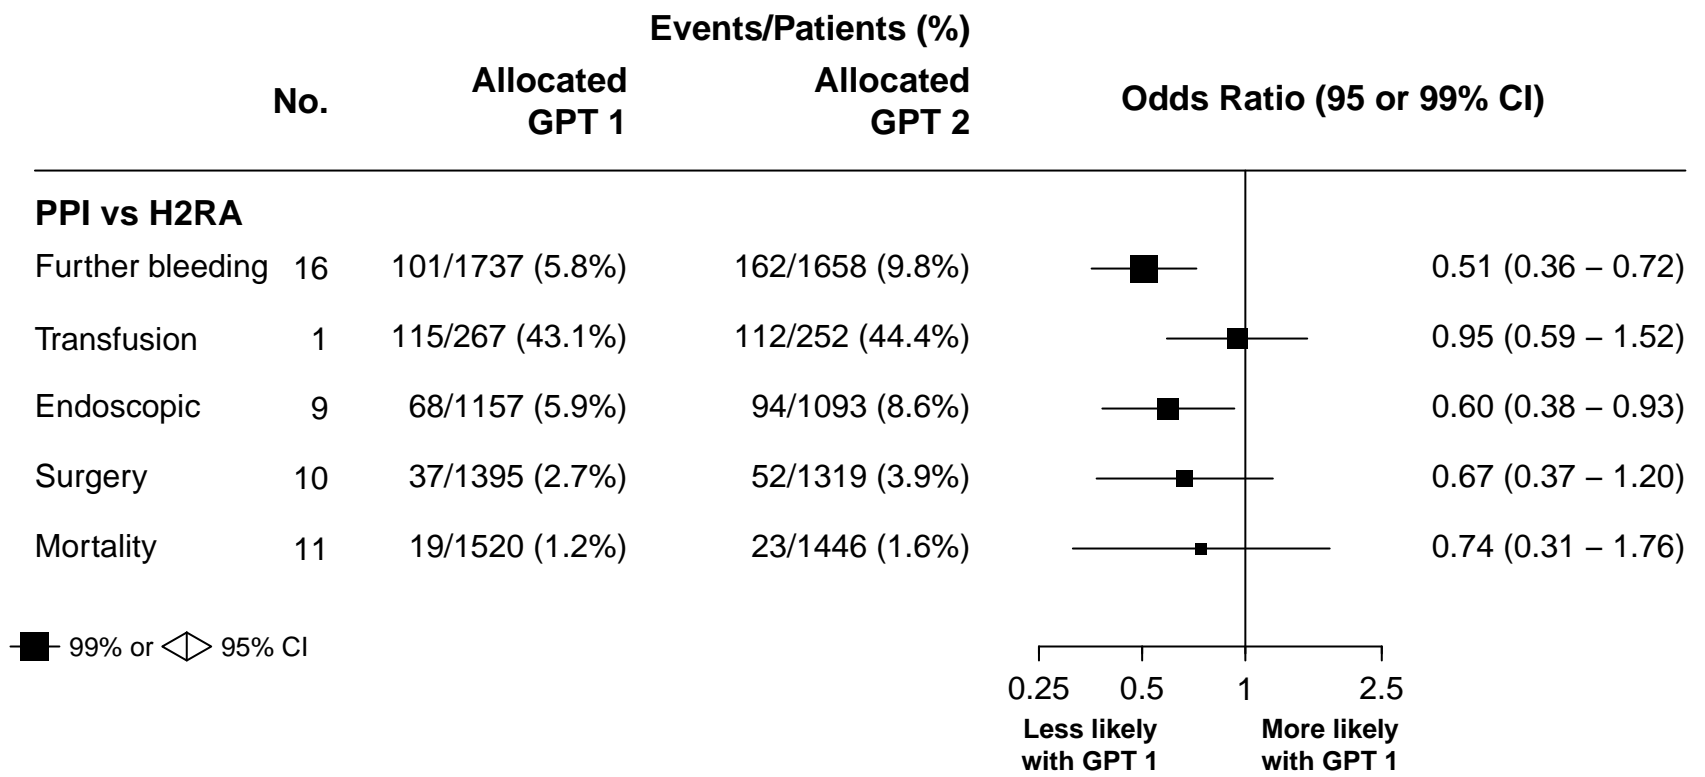

PPI=Proton pump inhibitors, H2RA=Histamine-2 receptor antagonists

One additional trial compared PA + PPI versus PPI, in which there were 7/56 vs 8/67 rebleeds, 1/56 vs 2/67 surgical procedures and 2/56 vs 1/67 deaths.

**Webfigure 11: Effects of gastroprotectants on further bleeding, need for blood transfusion, endoscopic intervention, surgery and all-cause mortality (acute UGI bleeding treatment trials of peptic ulcer)**

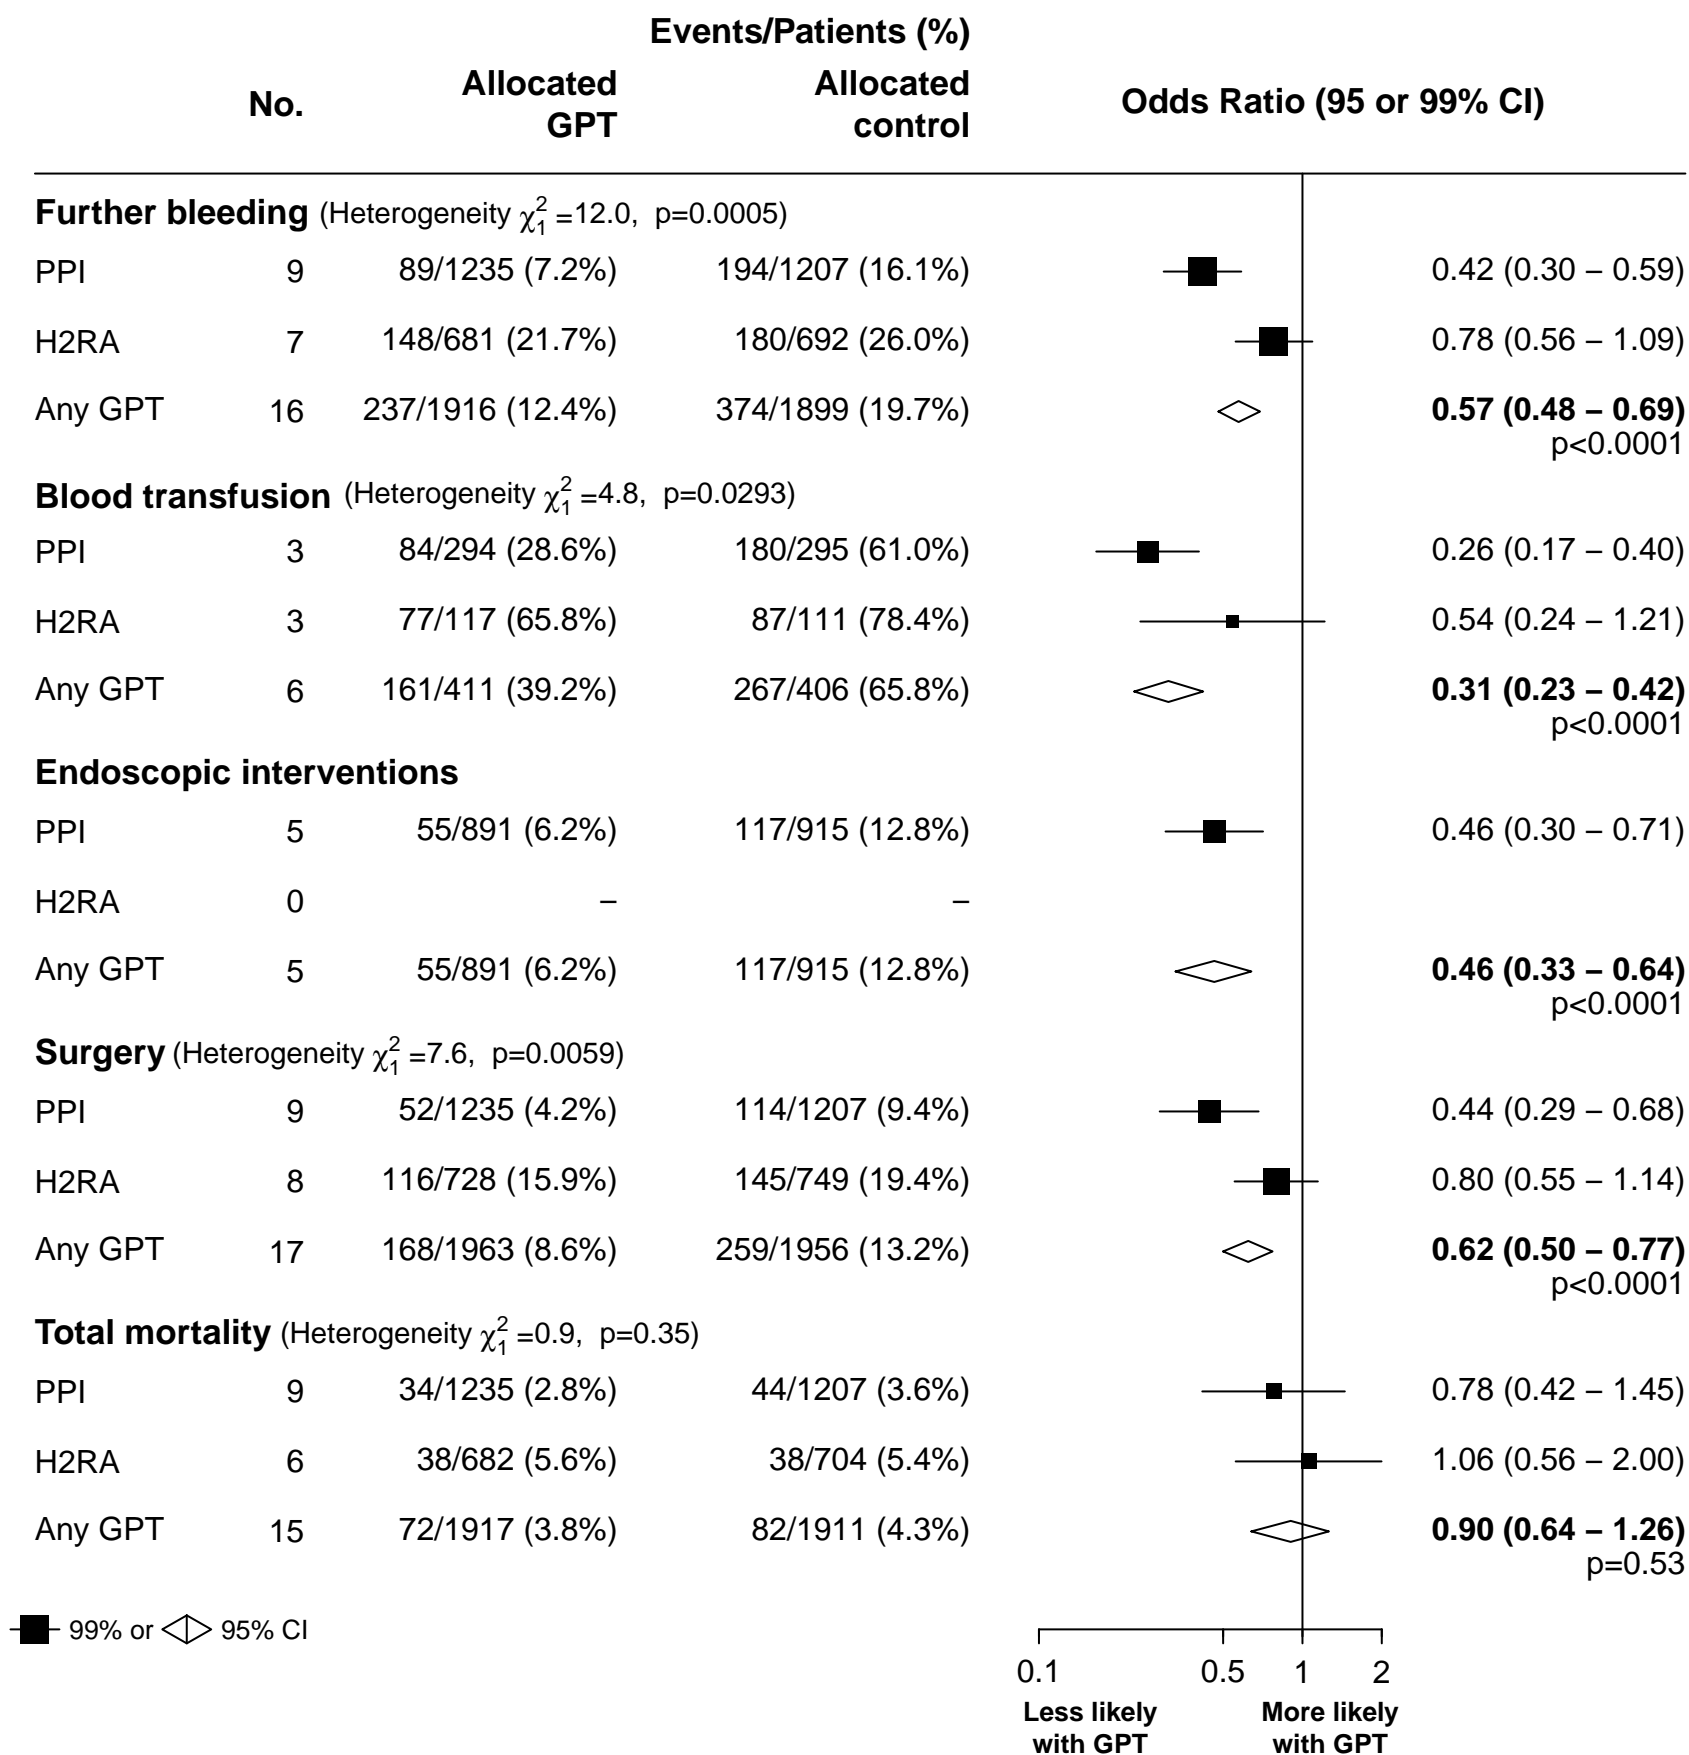

PPI=Proton pump inhibitors, H2RA=Histamine-2 receptor antagonists, GPT=Gastroprotectant drug

**Webfigure 12: Effects of gastroprotectants on further bleeding, need for blood transfusion, endoscopic intervention, surgery and all-cause mortality (acute UGI bleeding treatment trials of uncertain aetiology)**

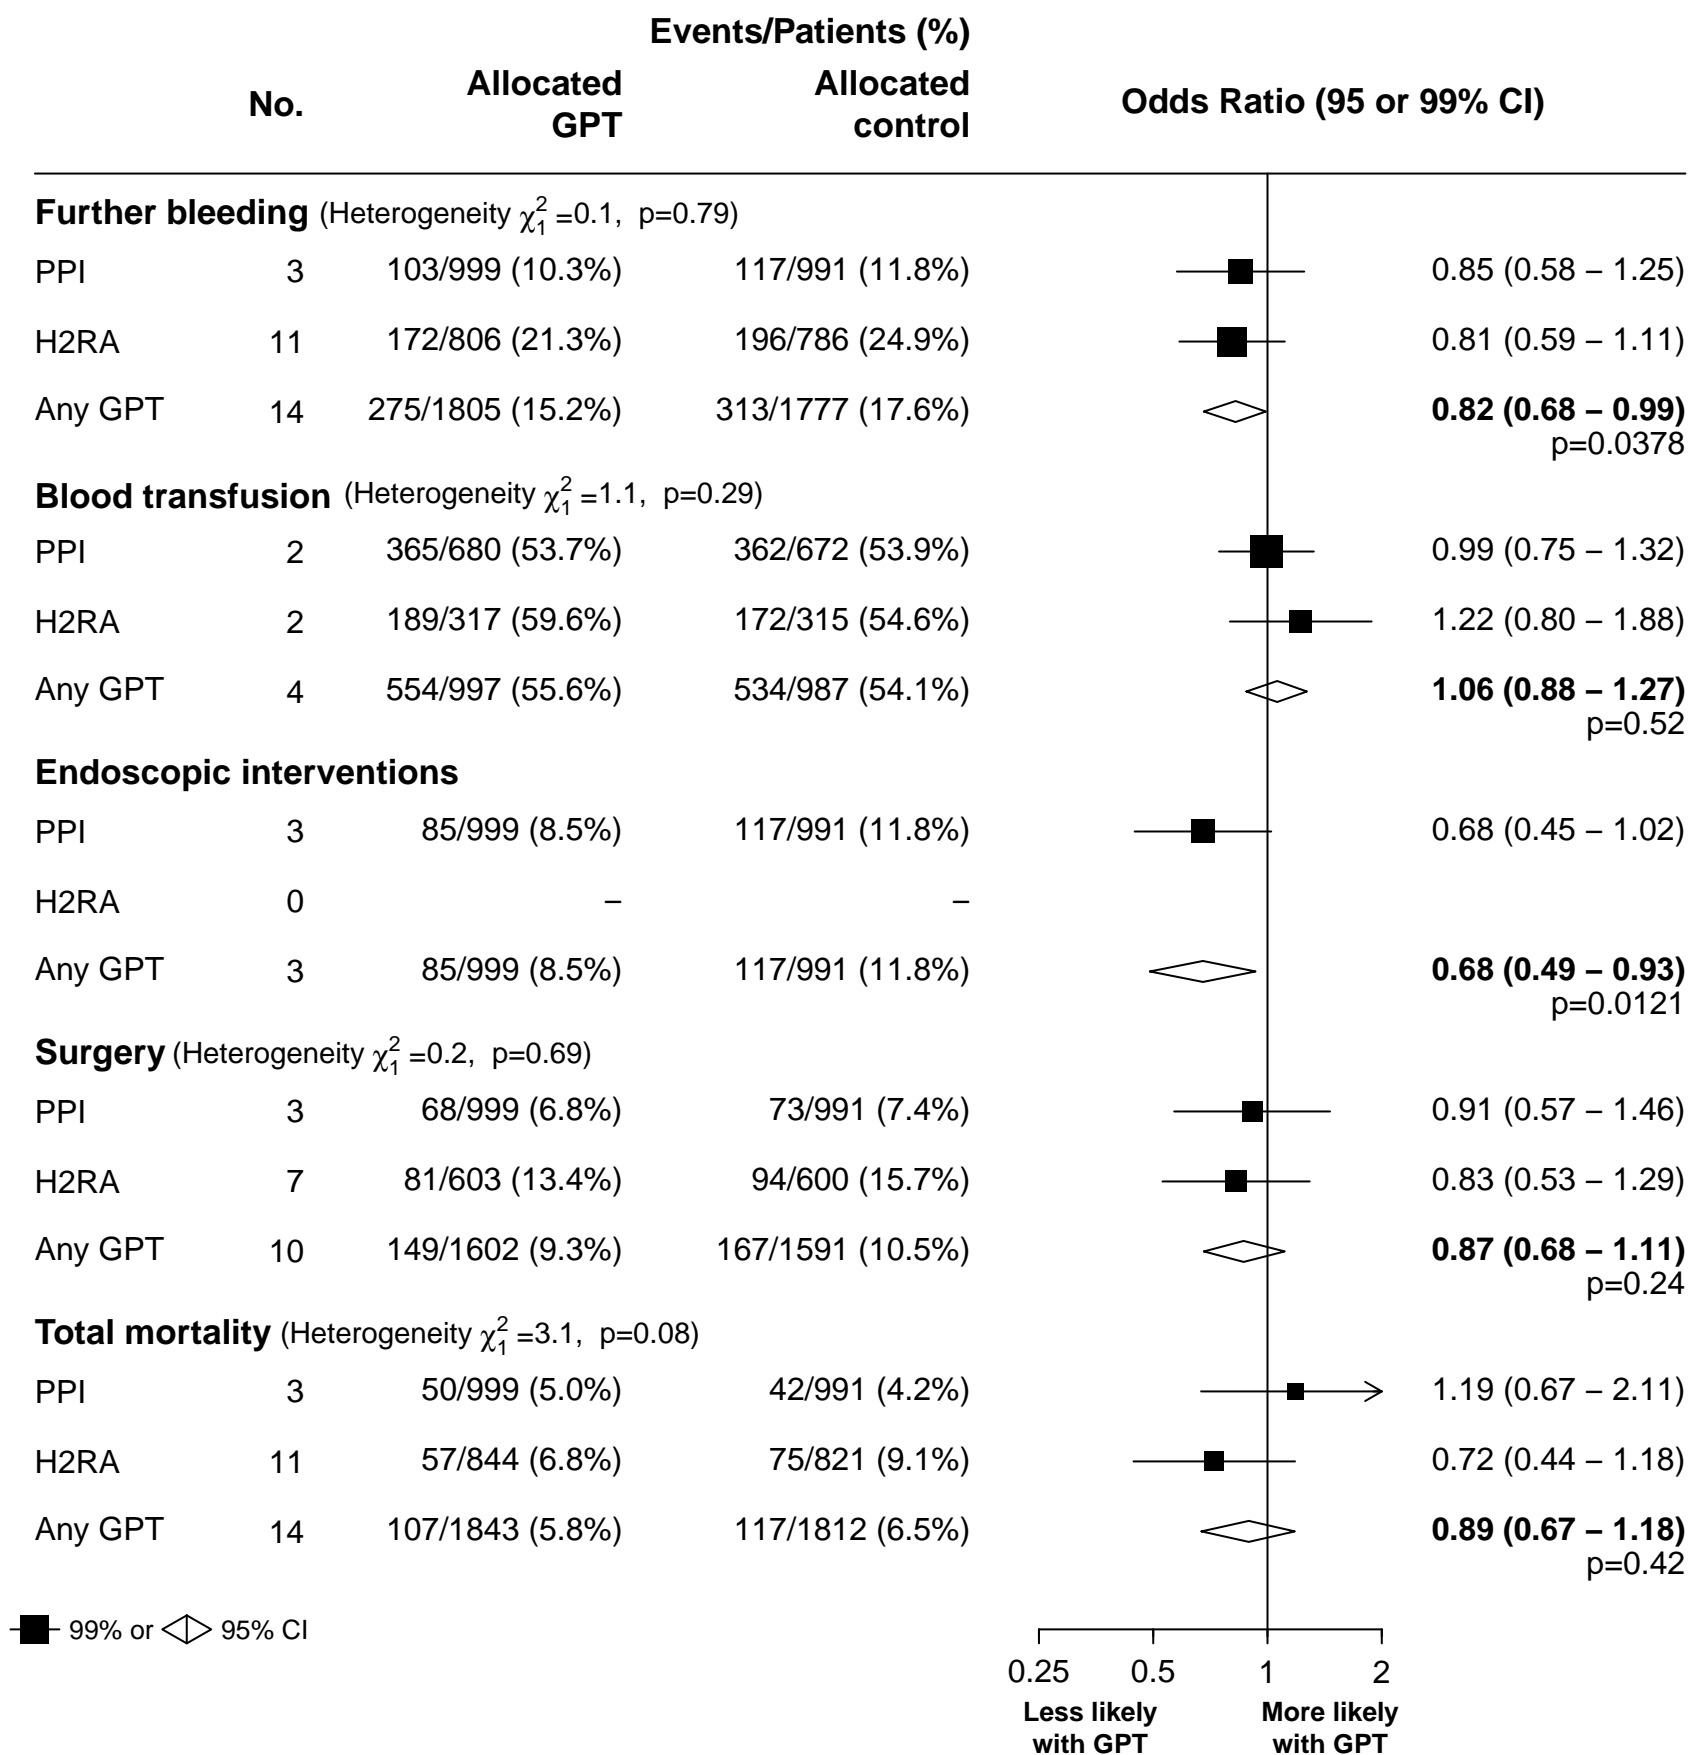

PPI=Proton pump inhibitors, H2RA=Histamine-2 receptor antagonists, GPT=Gastroprotectant drug

**Webfigure 13a: Acute UGI bleeding treatment trials – effects of individual gastroprotectant drugs on further bleeding**

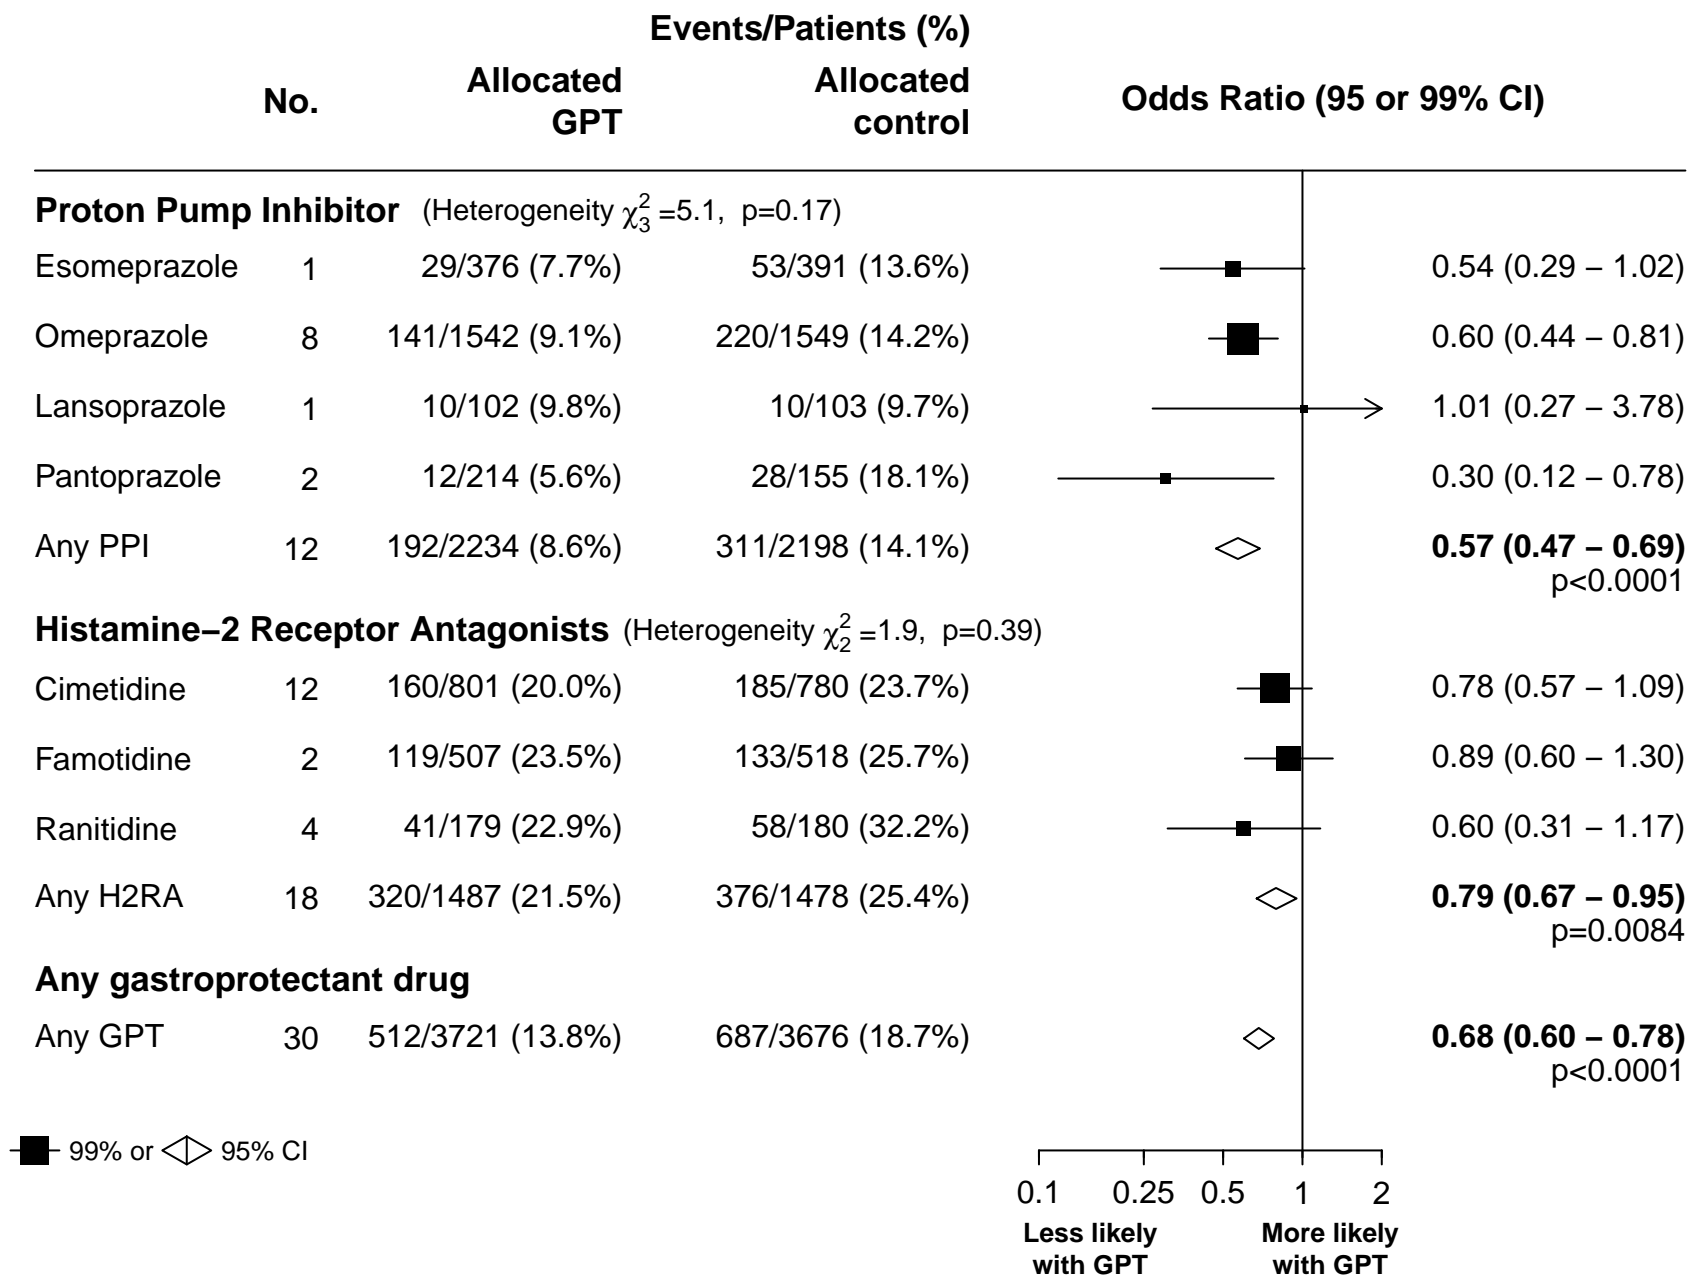

PPI=Proton pump inhibitors, H2RA=Histamine–2 receptor antagonists, GPT=Gastroprotectant drug



**Webfigure 13b: Acute UGI bleeding treatment trials – effects of individual gastroprotectant drugs on blood transfusion**

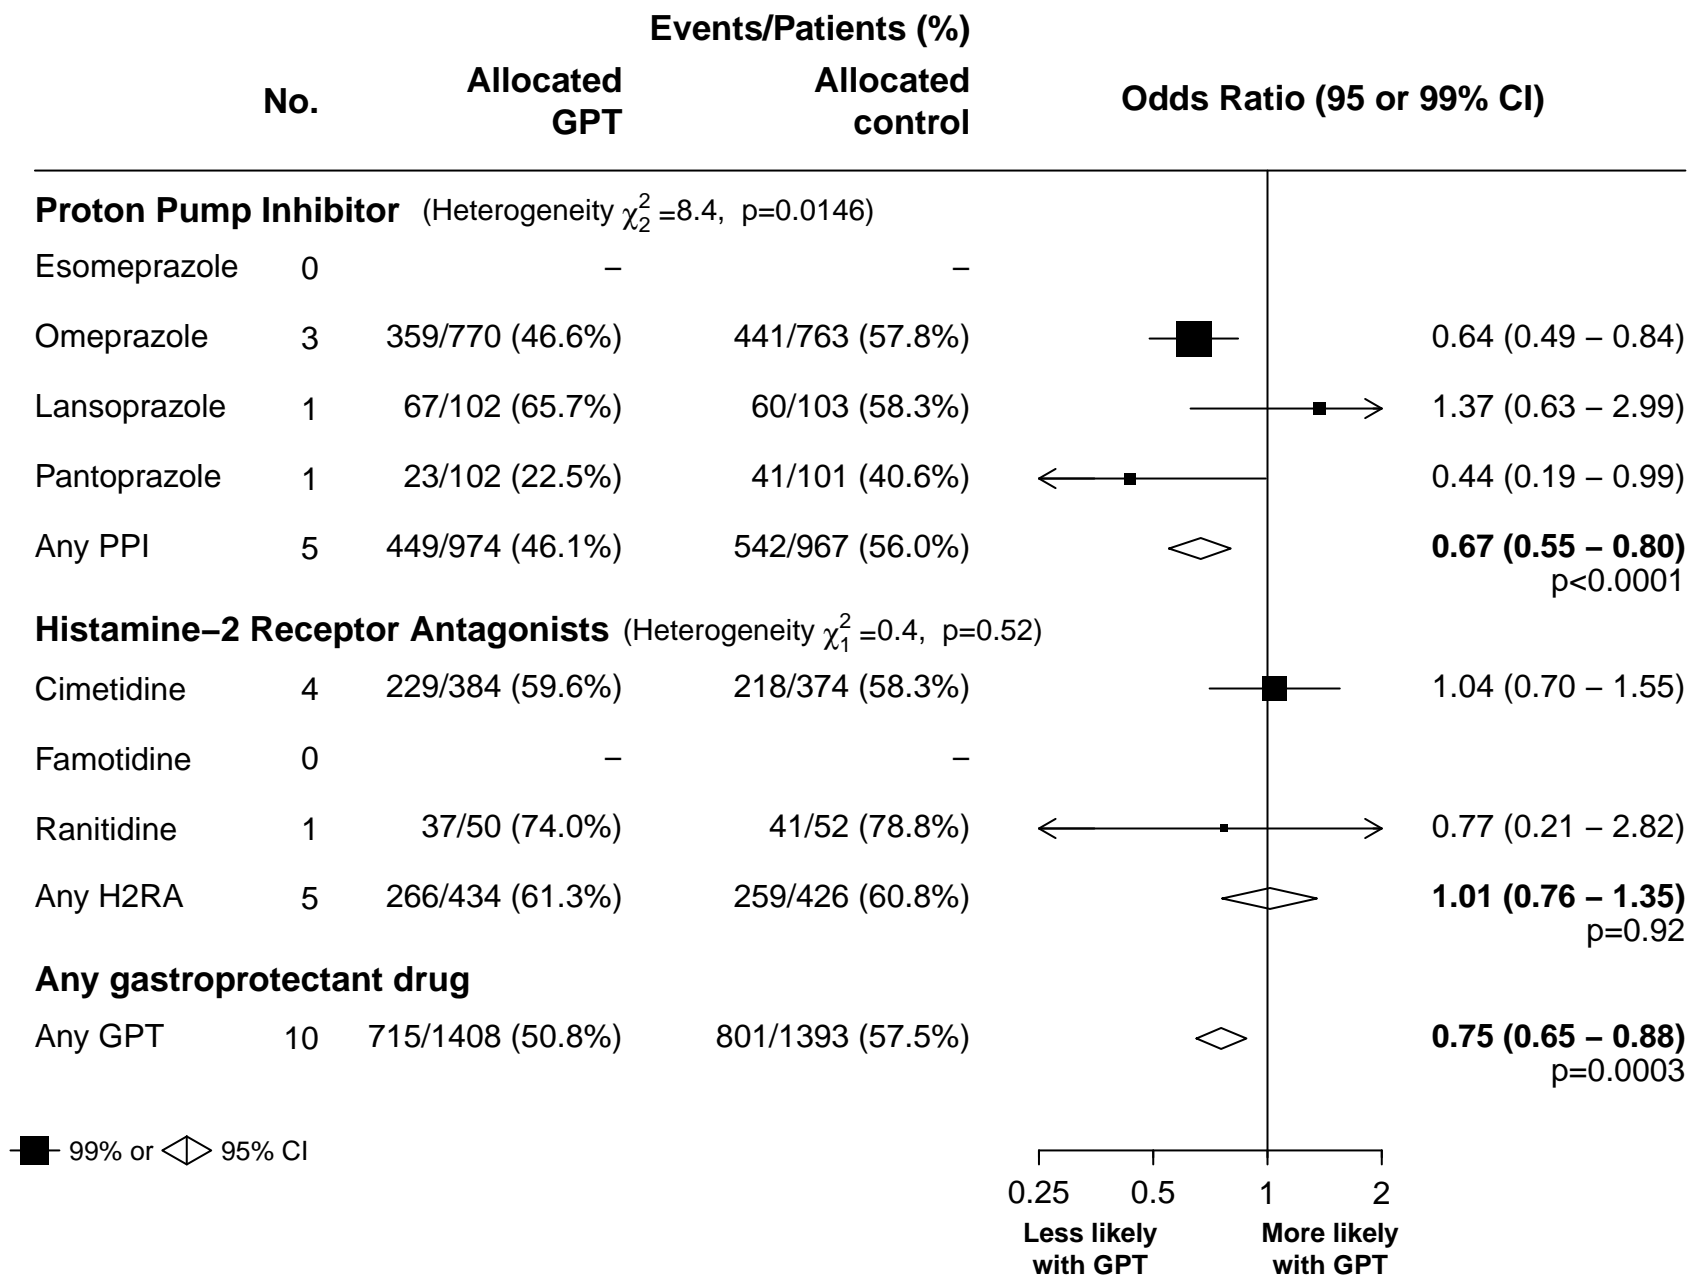

PPI=Proton pump inhibitors, H2RA=Histamine–2 receptor antagonists, GPT=Gastroprotectant drug

### Webfigure 13c: Acute UGI bleeding treatment trials – effects of individual gastroprotectant drugs on endoscopic interventions

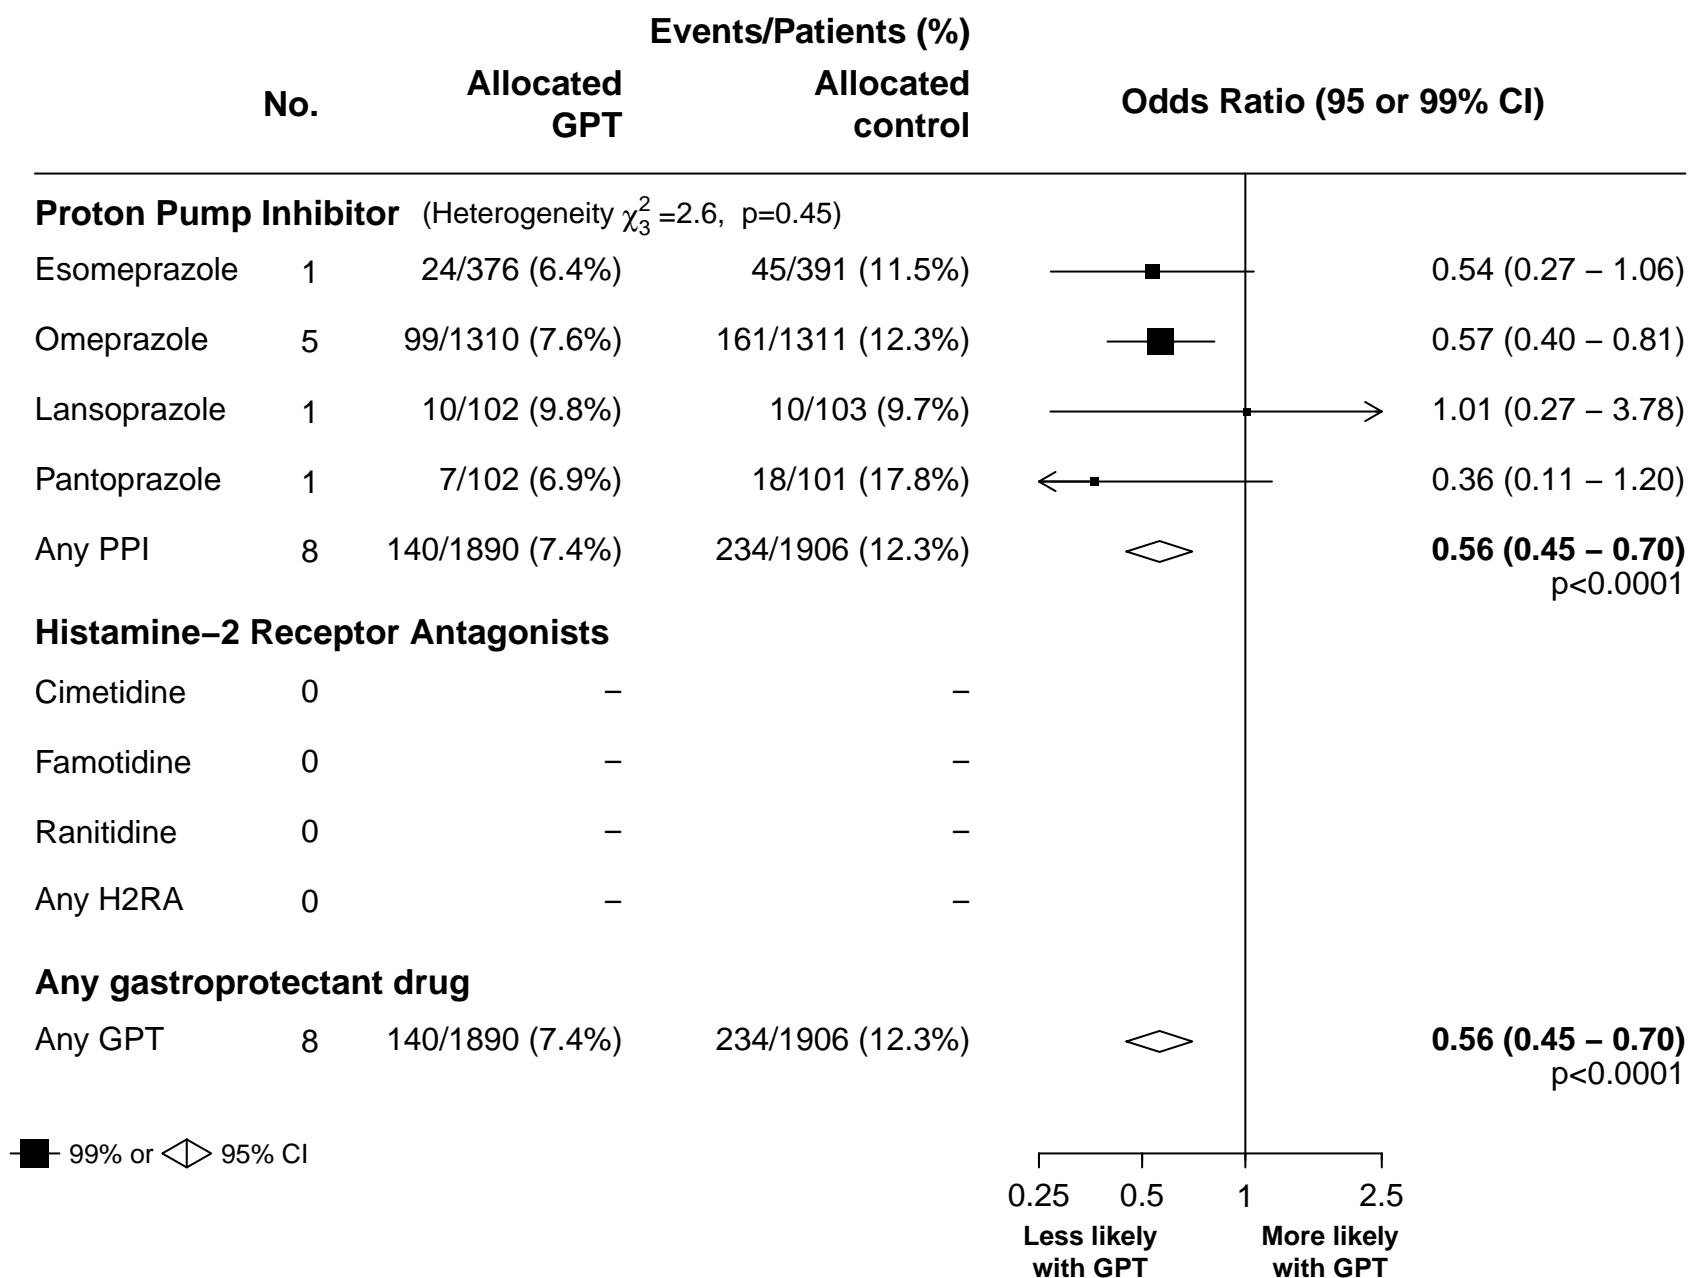

PPI=Proton pump inhibitors, H2RA=Histamine–2 receptor antagonists, GPT=Gastroprotectant drug

**Webfigure 13d: Acute UGI bleeding treatment trials – effects of individual gastroprotectant drugs on surgery**

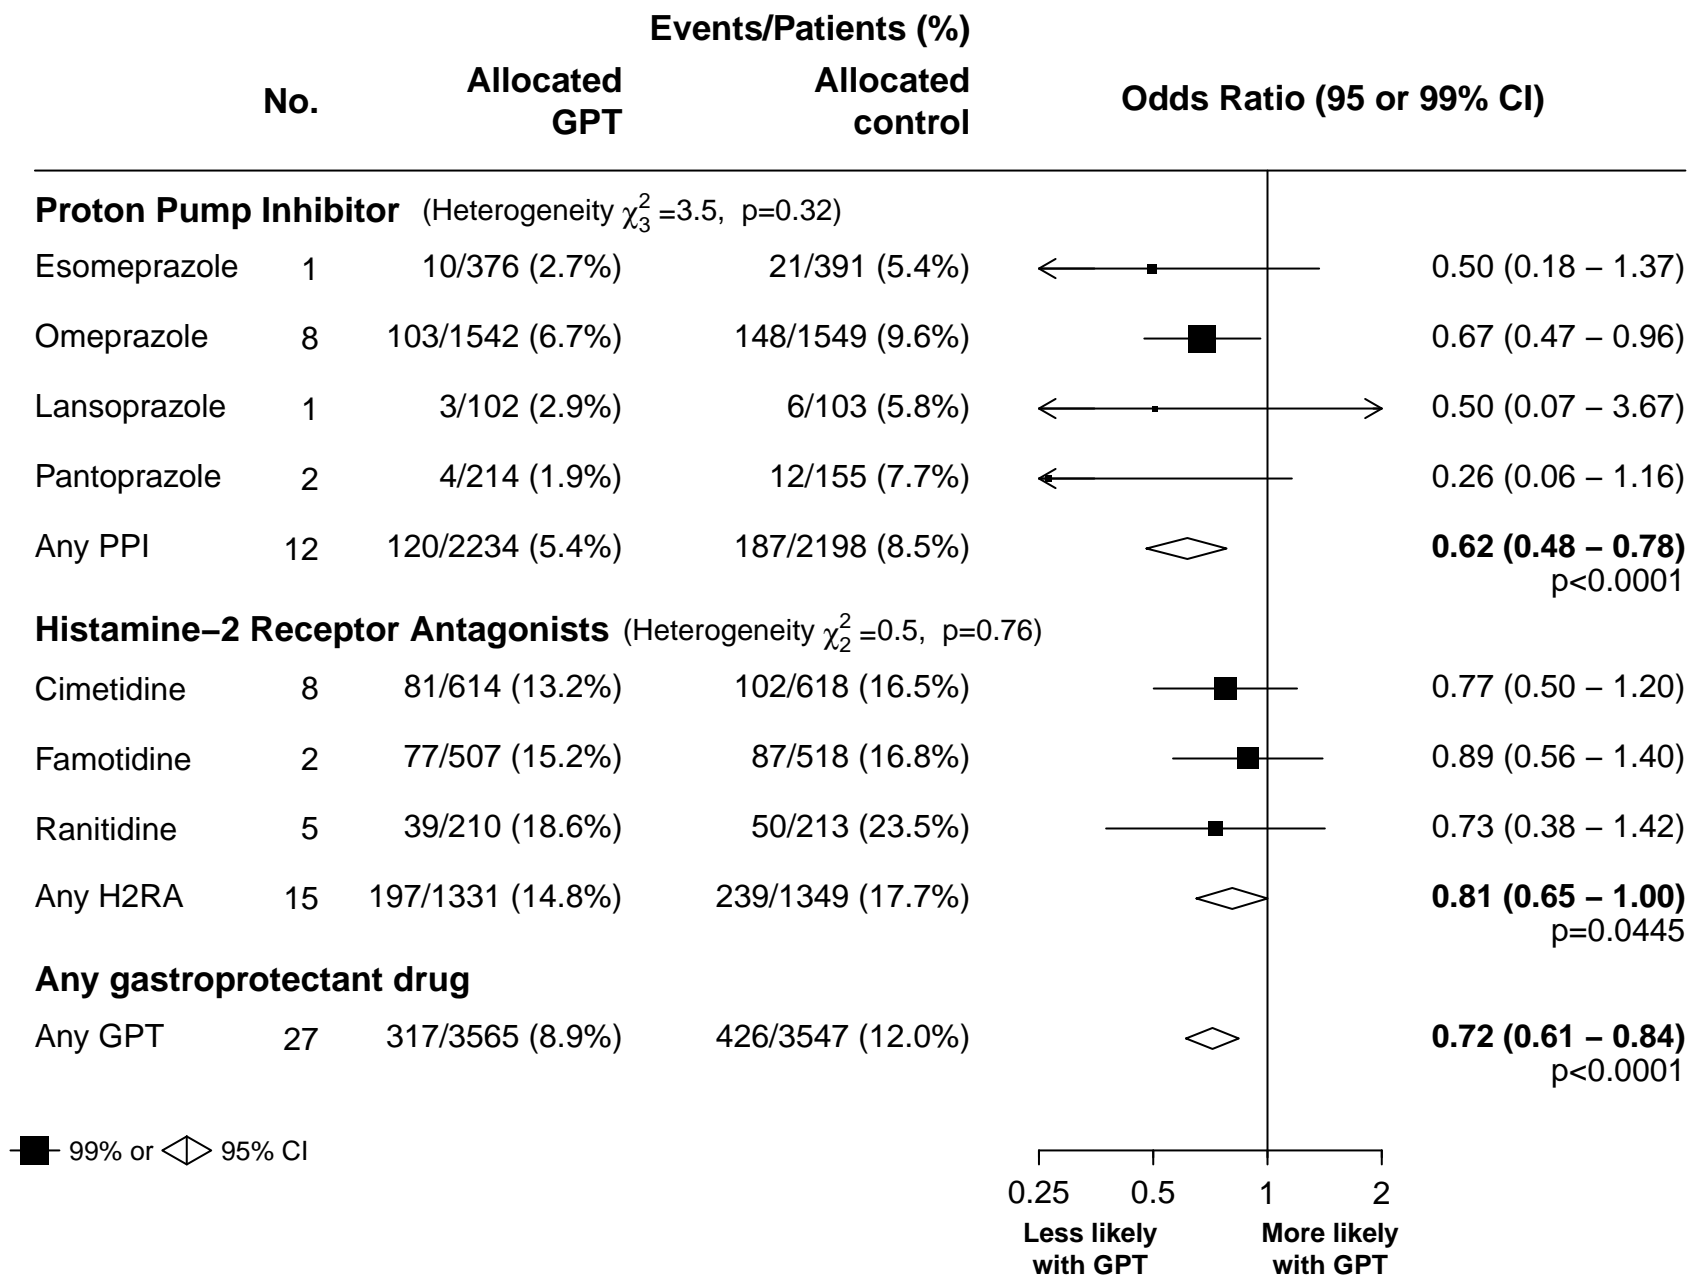

PPI=Proton pump inhibitors, H2RA=Histamine–2 receptor antagonists, GPT=Gastroprotectant drug

**Webfigure 13e: Acute UGI bleeding treatment trials – effects of individual gastroprotectant drugs on all-cause mortality**

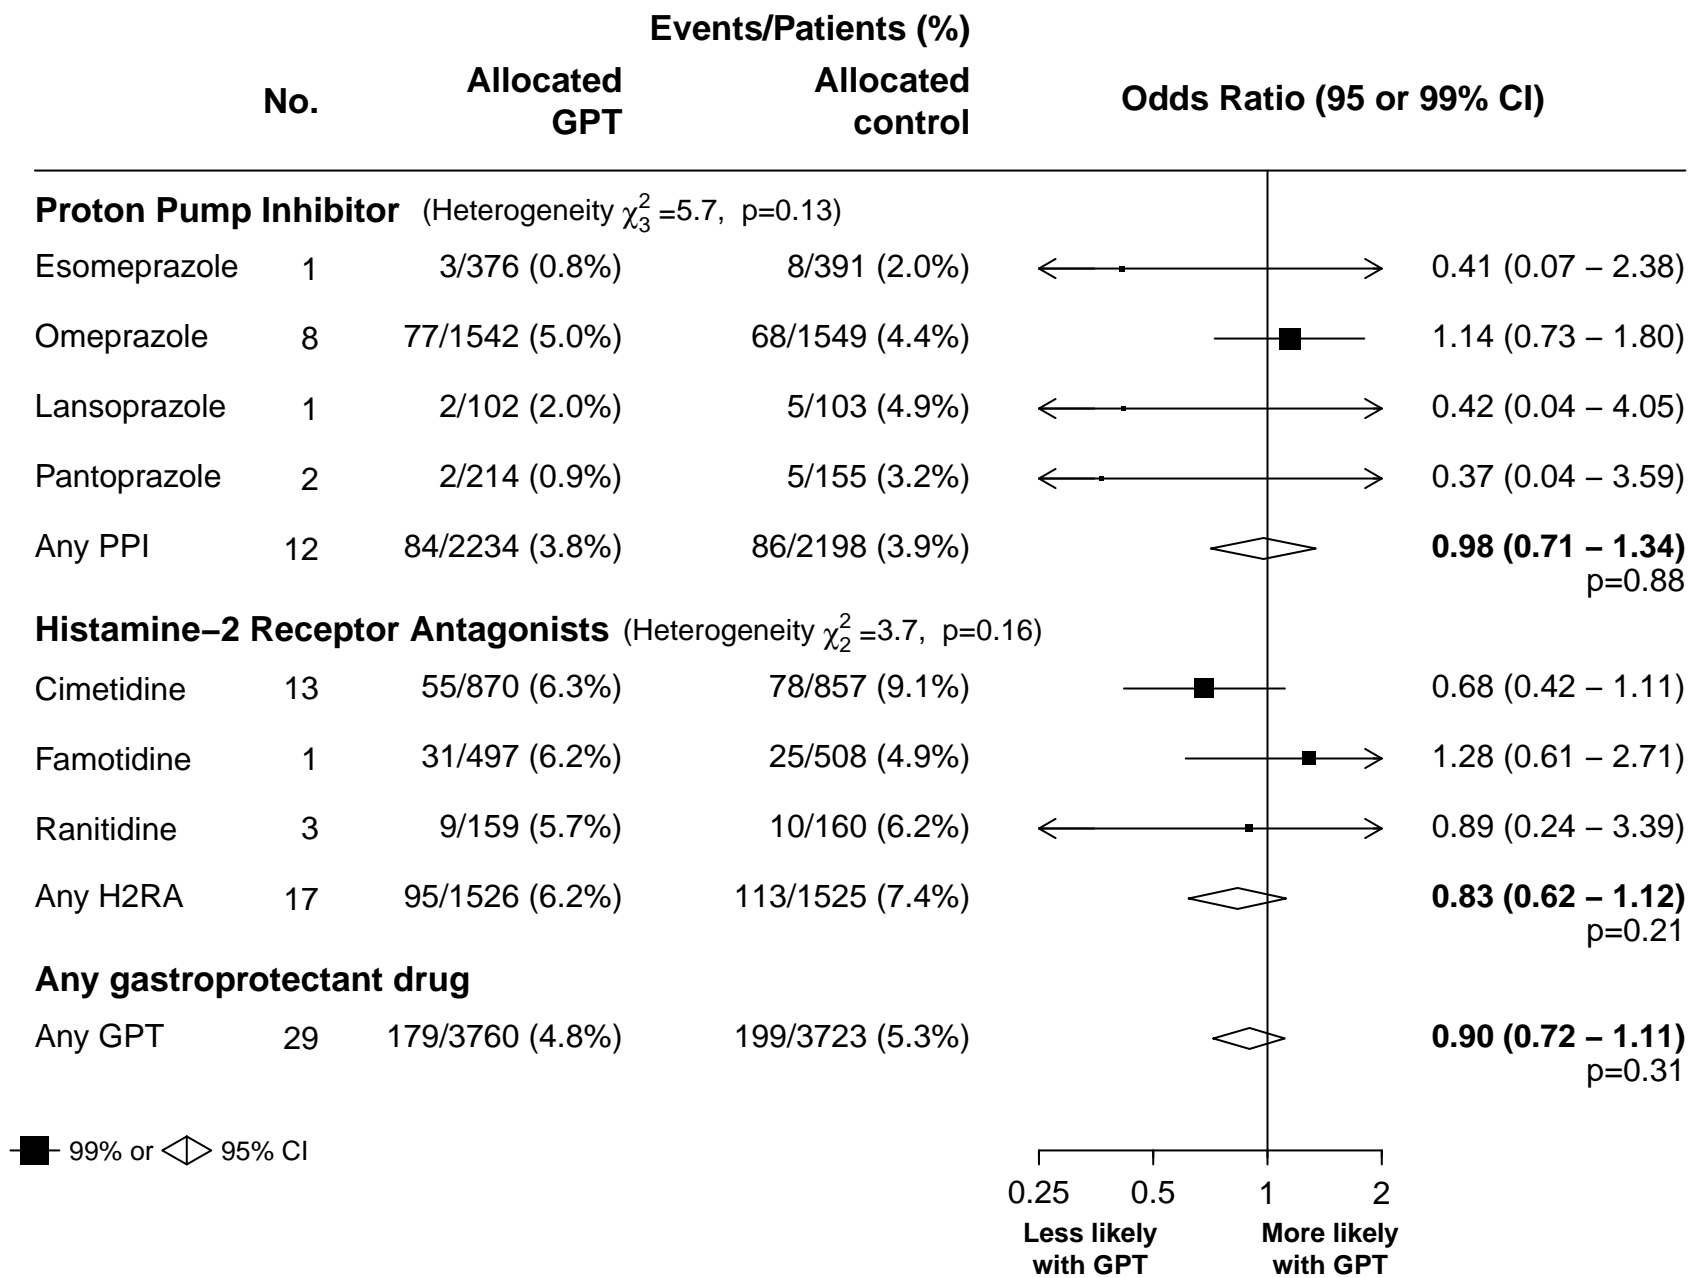

PPI=Proton pump inhibitors, H2RA=Histamine-2 receptor antagonists, GPT=Gastroprotectant drug

**Webfigure 14a: Prevention trials – effects of gastroprotectants on endoscopic and symptomatic ulcers, bleeds and all-cause mortality, subdivided by method of allocation concealment (secure vs other method)**

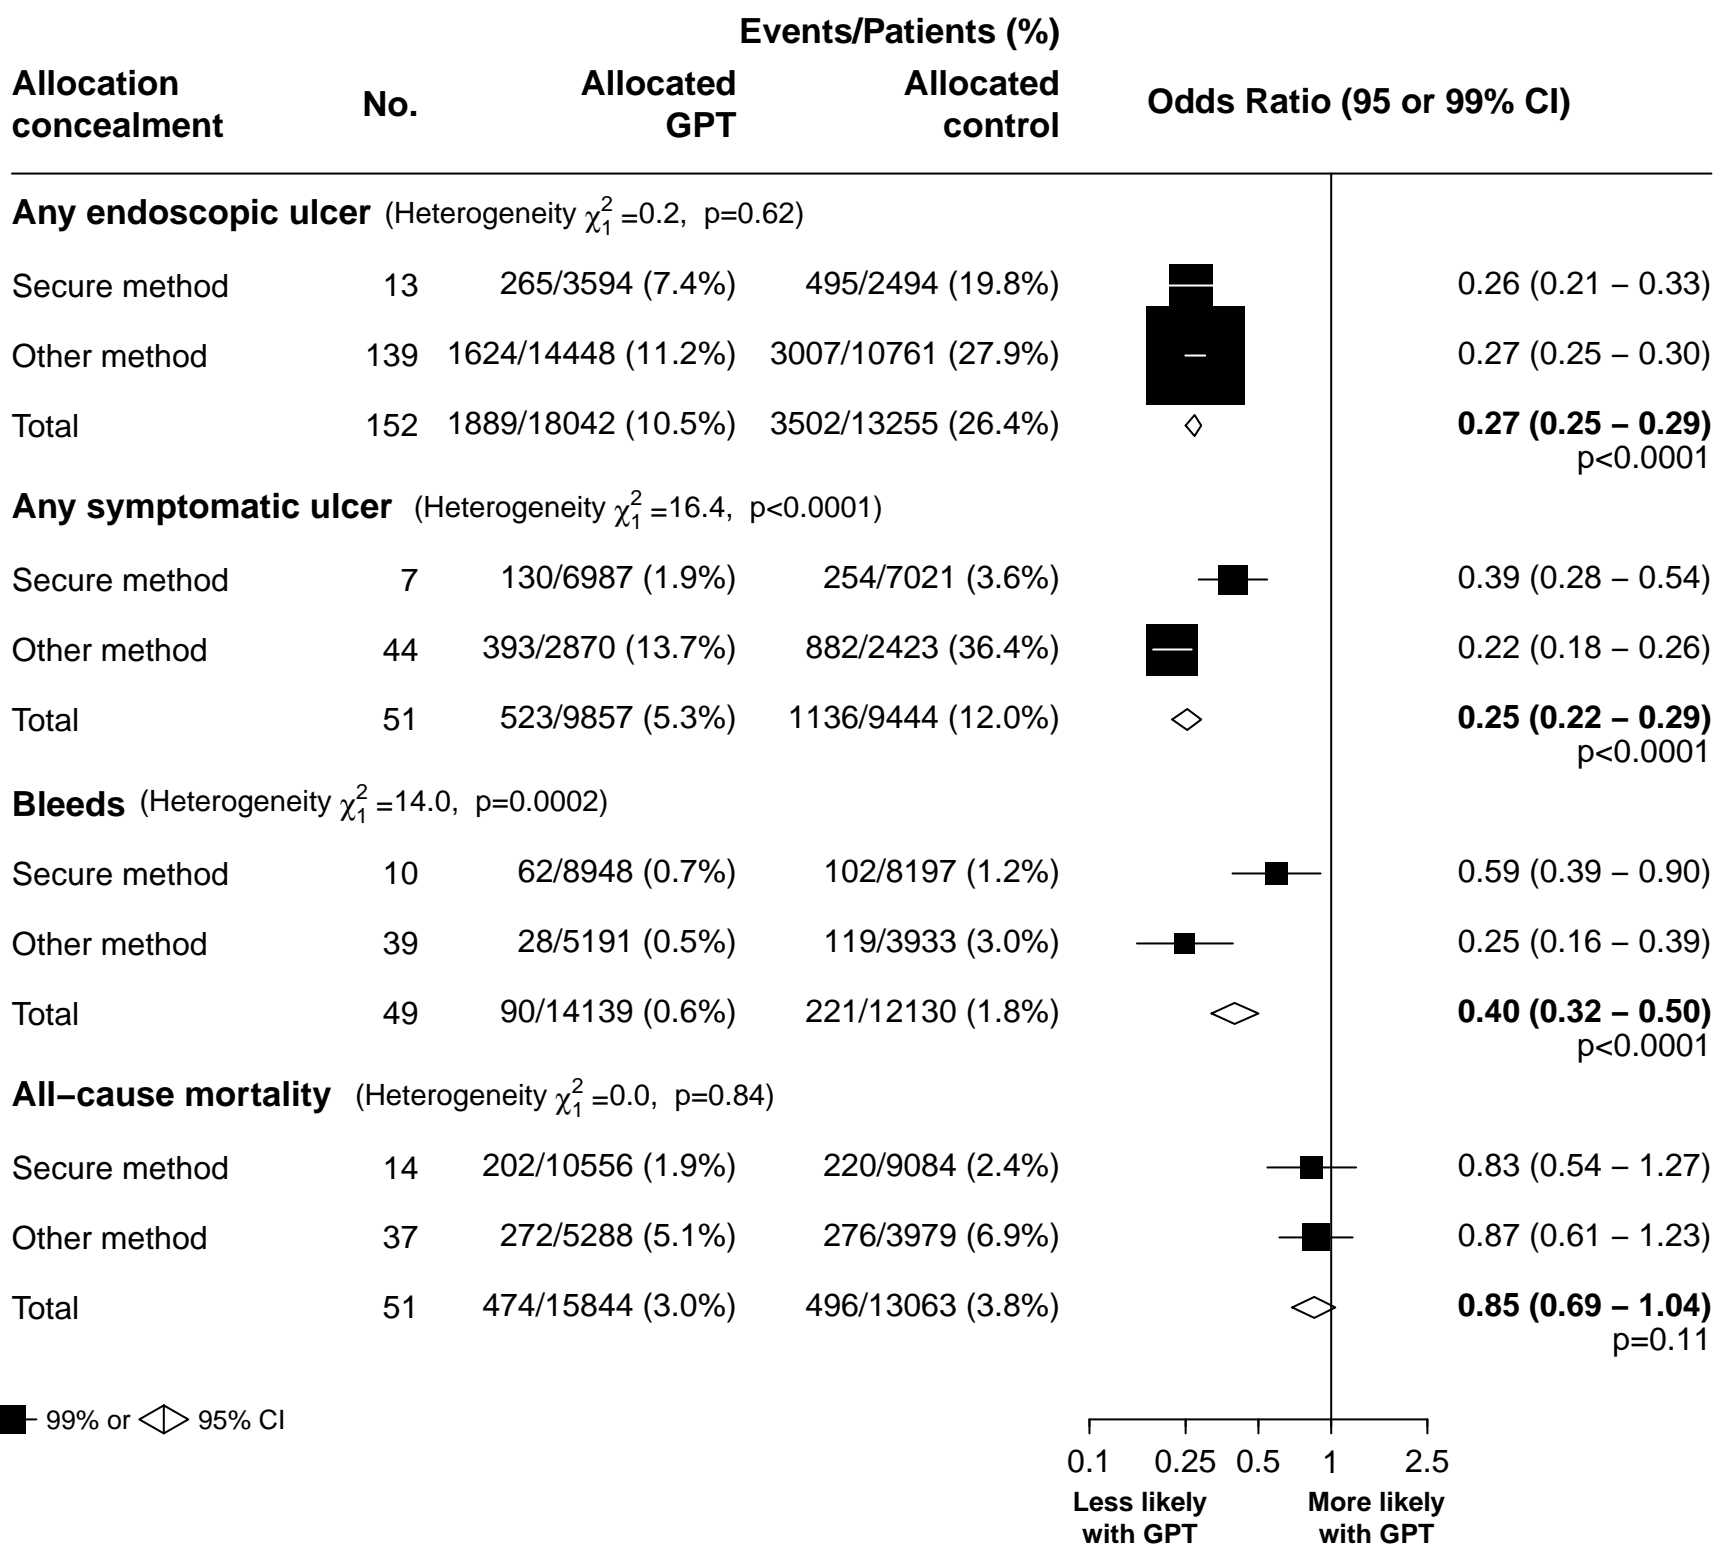

Secure methods of allocation concealment were considered to be: IVRS (Interactive Voice Response System); telephone central office; pharmacy coded containers administered sequentially; and onsite computer accessible only after entering patients details. Other methods included sealed envelopes, closed lists of random numbers, or unspecified method.

**Webfigure 14b: Prevention trials – effects of gastroprotectants on endoscopic and symptomatic ulcers, bleeds and all-cause mortality, subdivided by methods of blinding of investigators and patients**

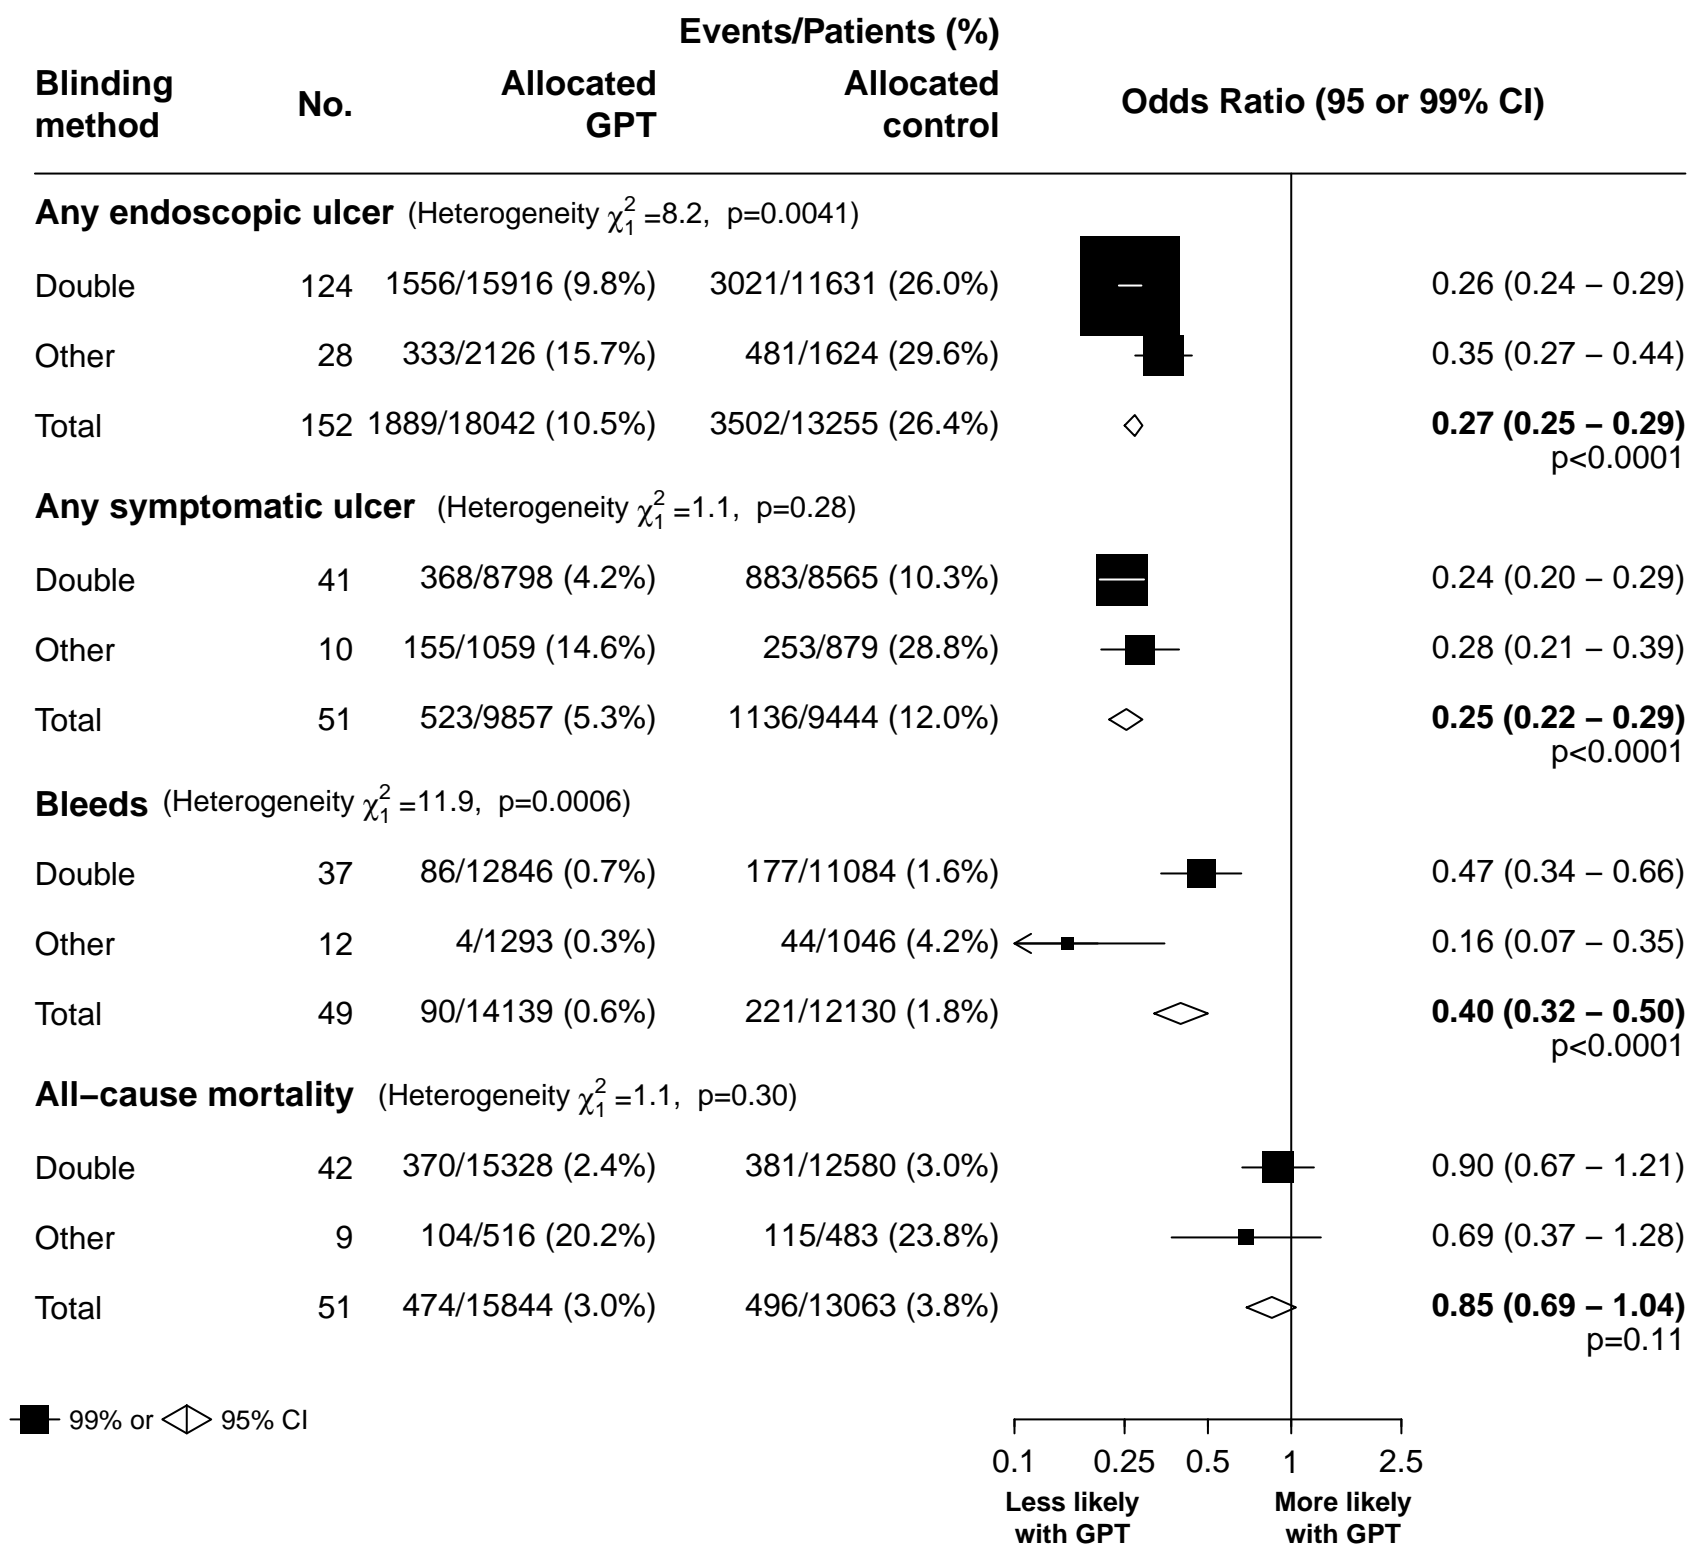

Double=double-blind (ie, both patients and investigators were unaware of the treatment allocation)

# Webfigure 15a: Prevention trials – funnel plots of each gastroprotectant class vs control for particular outcomes

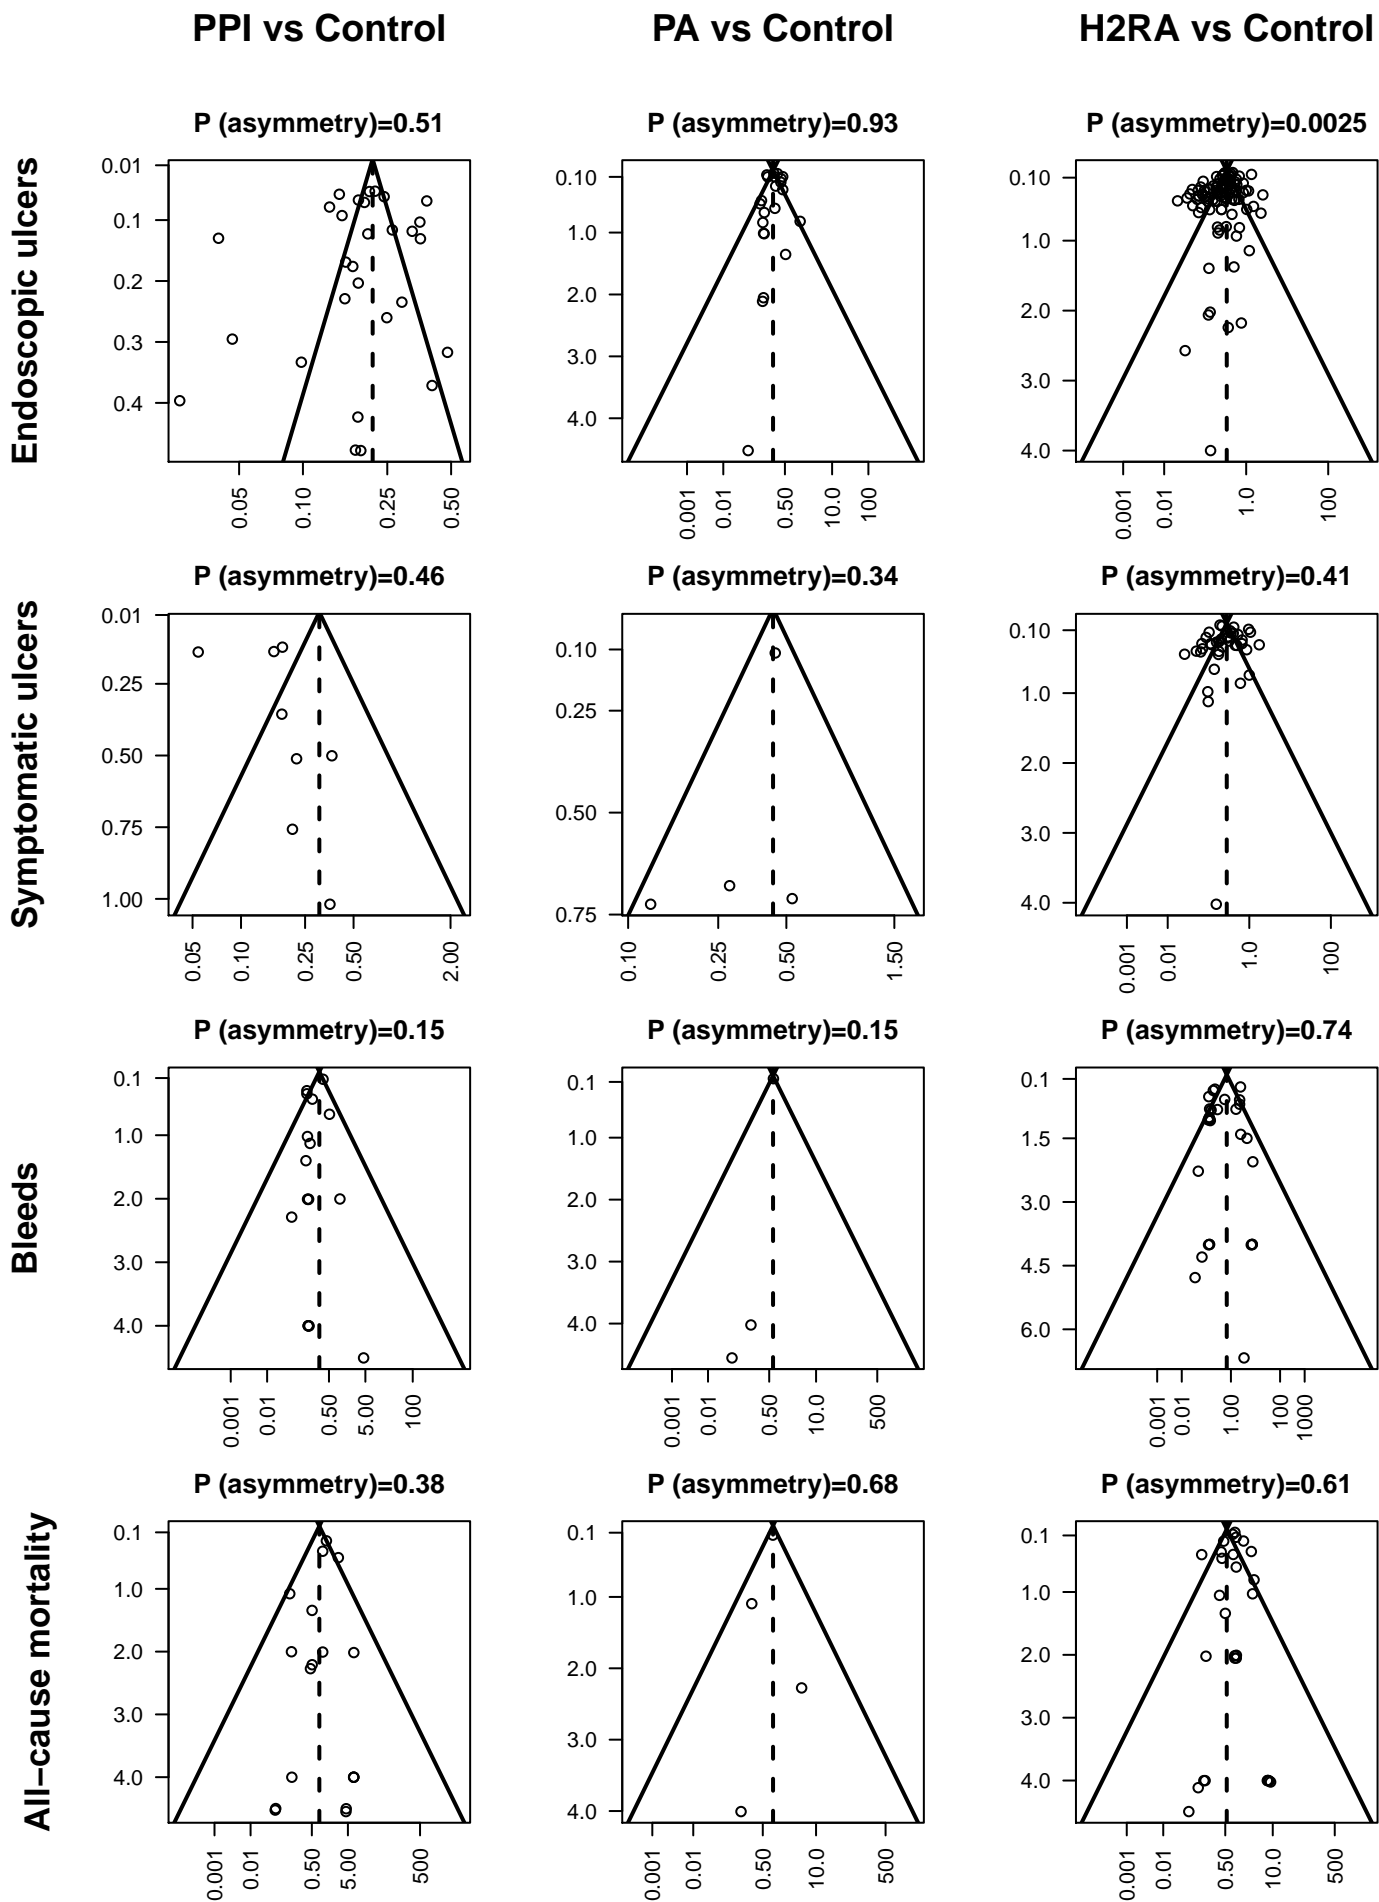

Each point represents the result from a single trial. In each panel, the odds ratio is shown on the x-axis (on a doubling scale) and the standard error of the log-odds ratio is shown on the y-axis. The vertical dashed line in each panel represent the information-weighted average odds ratio across the trials.

P (asymmetry) is the corresponding p-value of Egger's test for asymmetry of the funnel plot.

# Webfigure 15b: Healing trials – funnel plots of each gastroprotectant class vs control for endoscopic ulcer healing

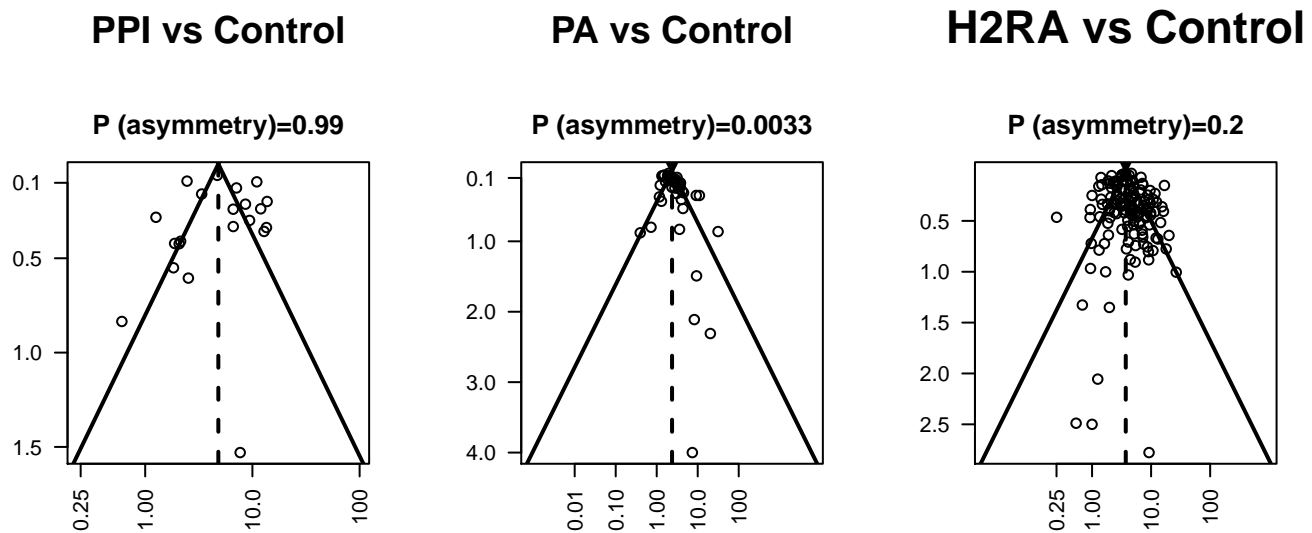

Each point represents the result from a single trial. In each panel, the odds ratio is shown on the x-axis (on a doubling scale) and the standard error of the log-odds ratio is shown on the y-axis. The vertical dashed line in each panel represent the information-weighted average odds ratio across the trials.

P (asymmetry) is the corresponding p-value of Egger's test for asymmetry of the funnel plot.



# Webfigure 15c: Acute bleeding trials – funnel plots of each gastroprotectant class vs control for particular outcomes

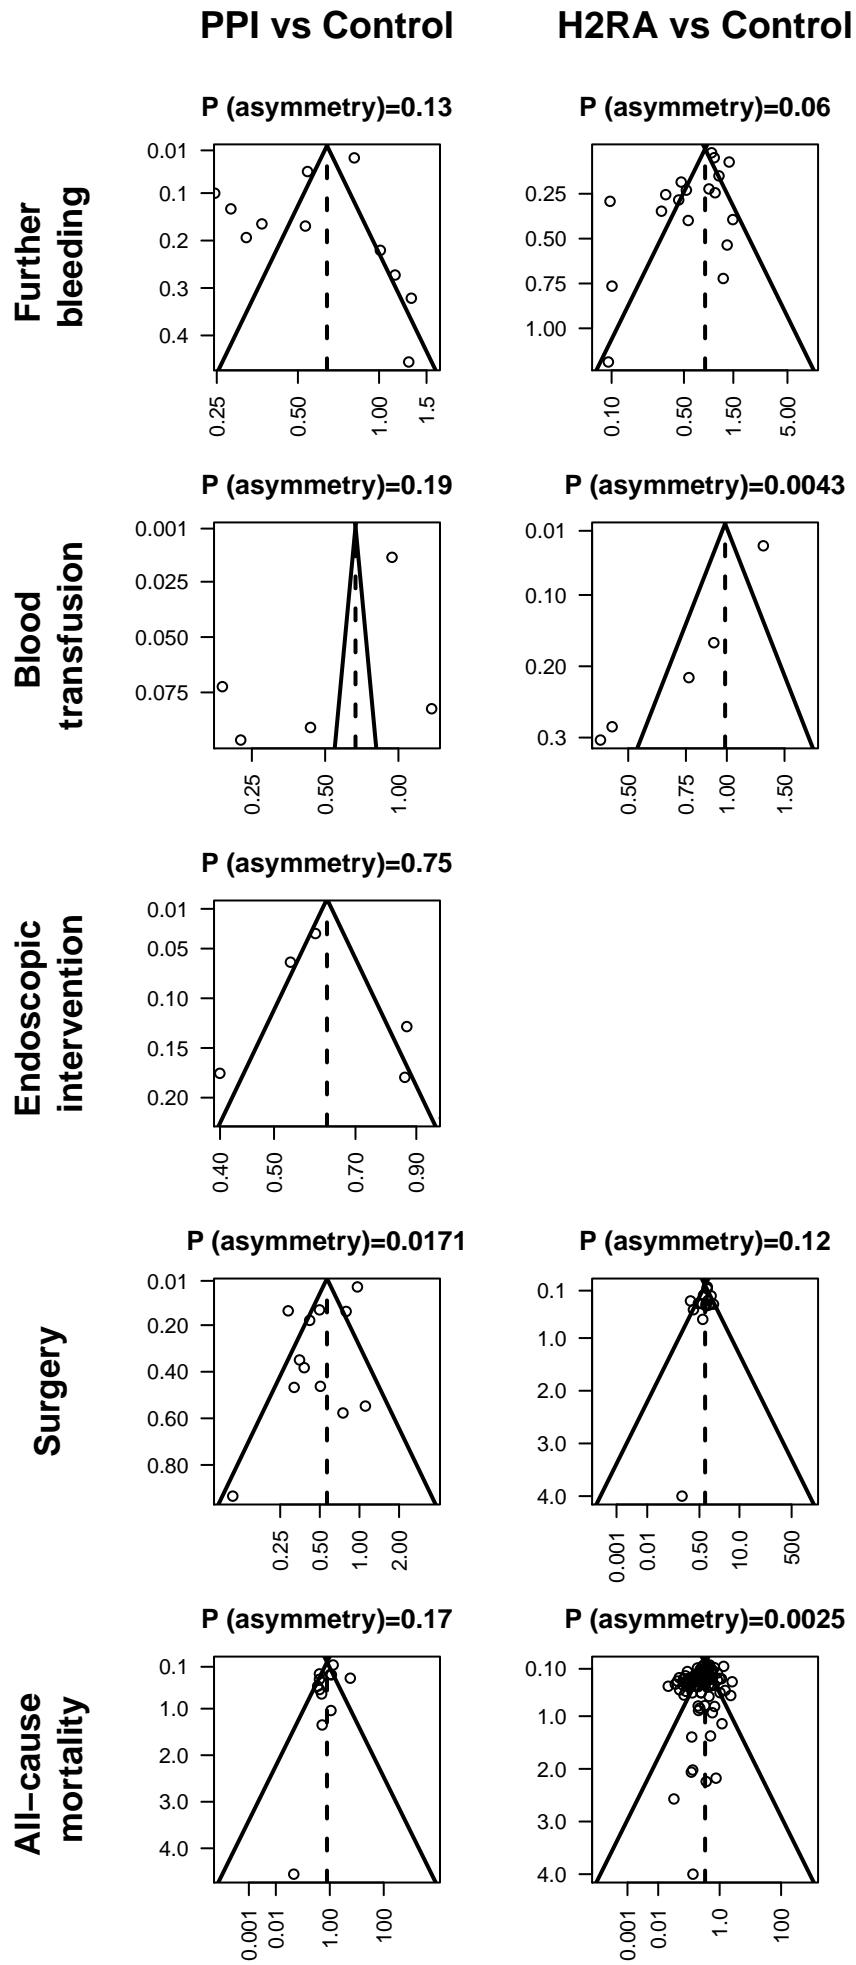

Each point represents the result from a single trial. In each panel, the odds ratio is shown on the x-axis (on a doubling scale) and the standard error of the log-odds ratio is shown on the y-axis. The vertical dashed line in each panel represent the information-weighted average odds ratio across the trials.

P (asymmetry) is the corresponding p-value of Egger's test for asymmetry of the funnel plot.

**Webfigure 16a: Prevention trials – effects of gastroprotectants on any endoscopic ulcers (direct vs network meta-analytic effect estimates)**

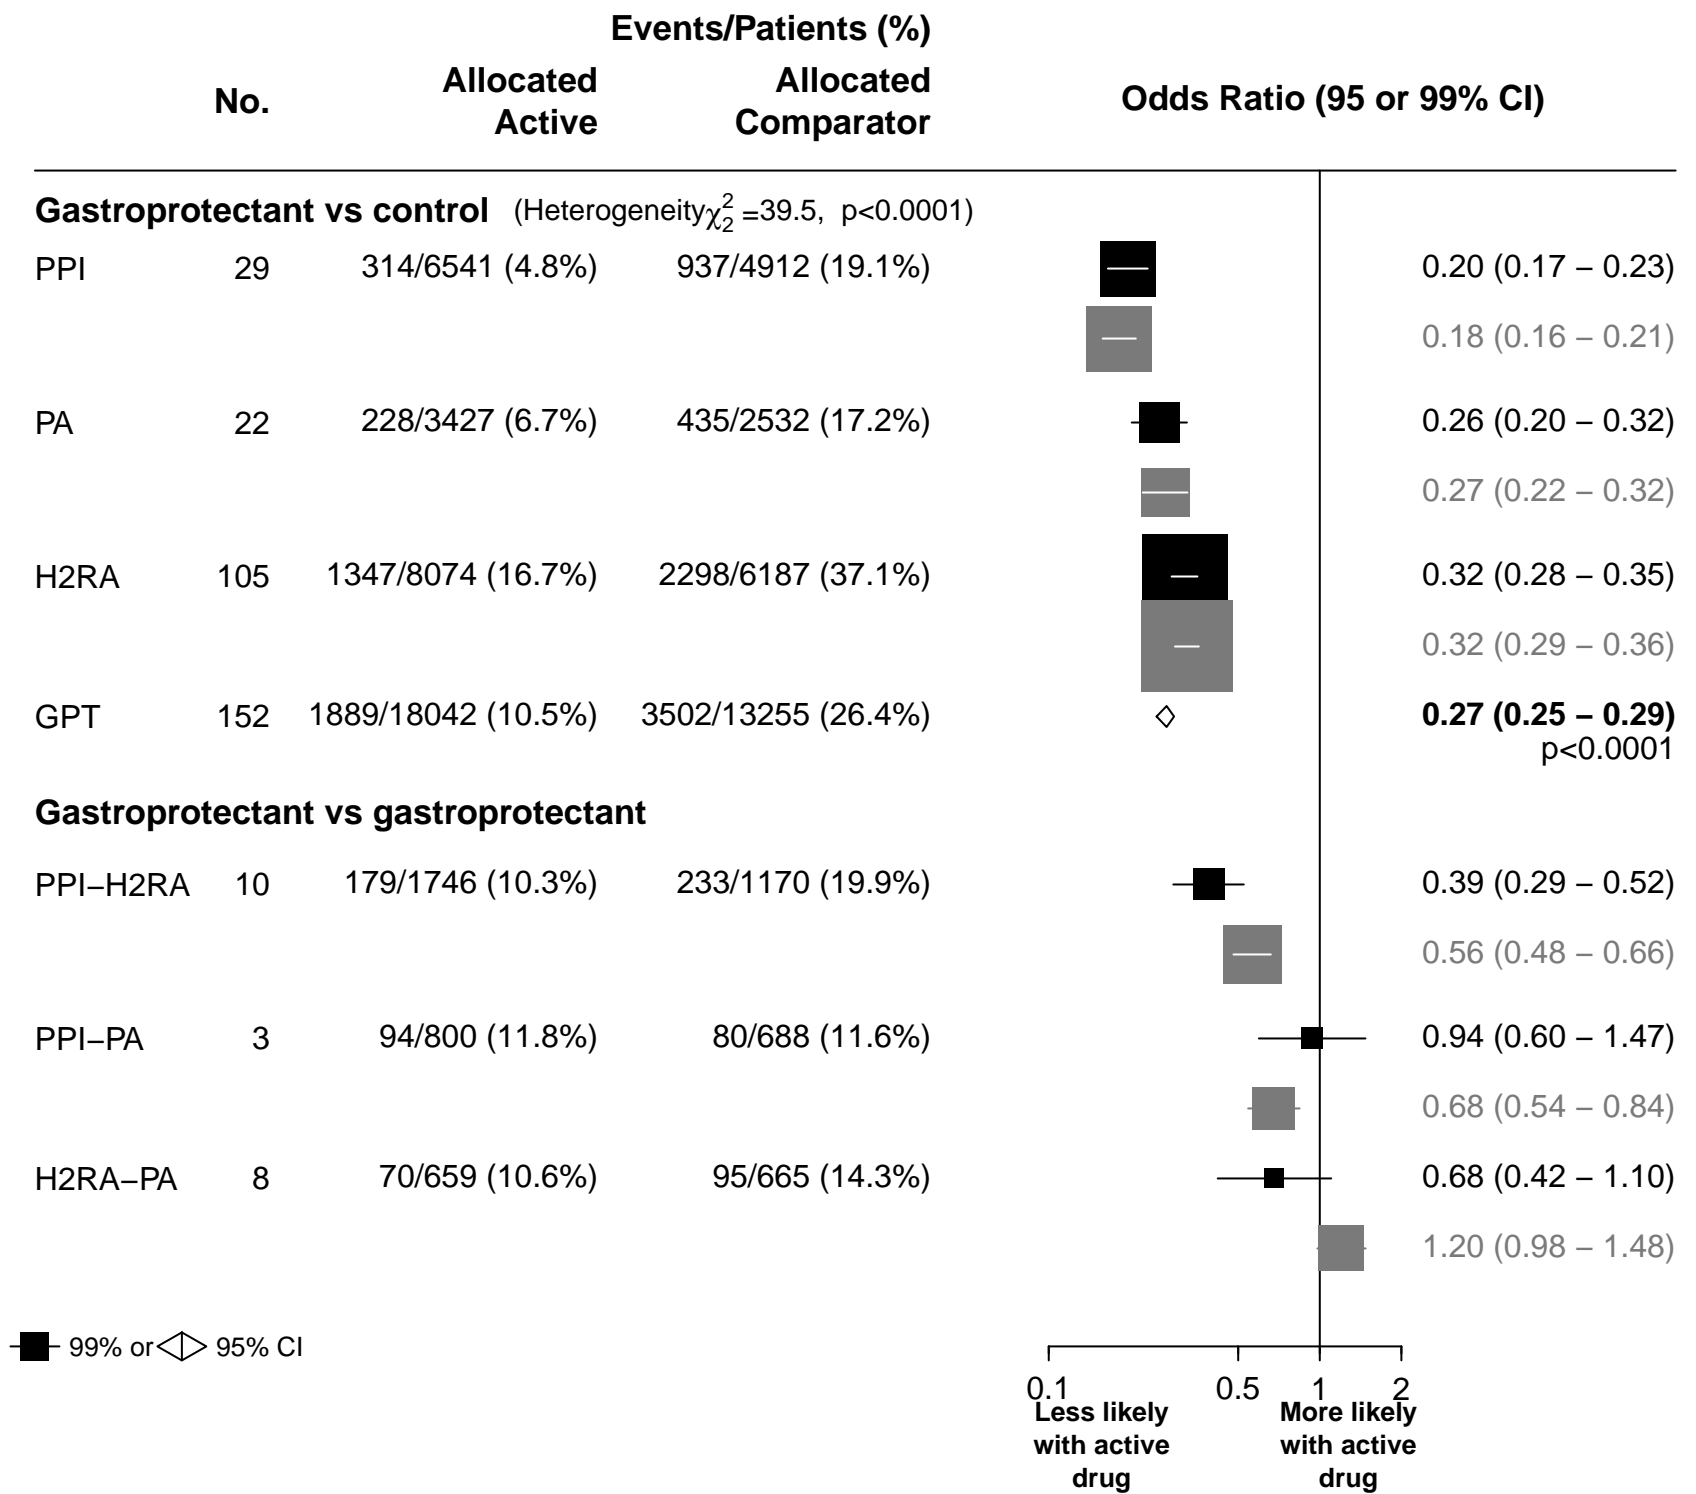

PPI=Proton pump inhibitors, PA=Prostaglandin analogues, H2RA=Histamine–2 receptor antagonists, GPT=Any gastroprotectant drug

Black squares and lines correspond to the direct treatment comparisons and grey squares and lines to the network meta-analysis estimates.

**Webfigure 16b: Prevention trials – effects of gastroprotectants on any symptomatic ulcers (direct vs network meta-analytic effect estimates)**

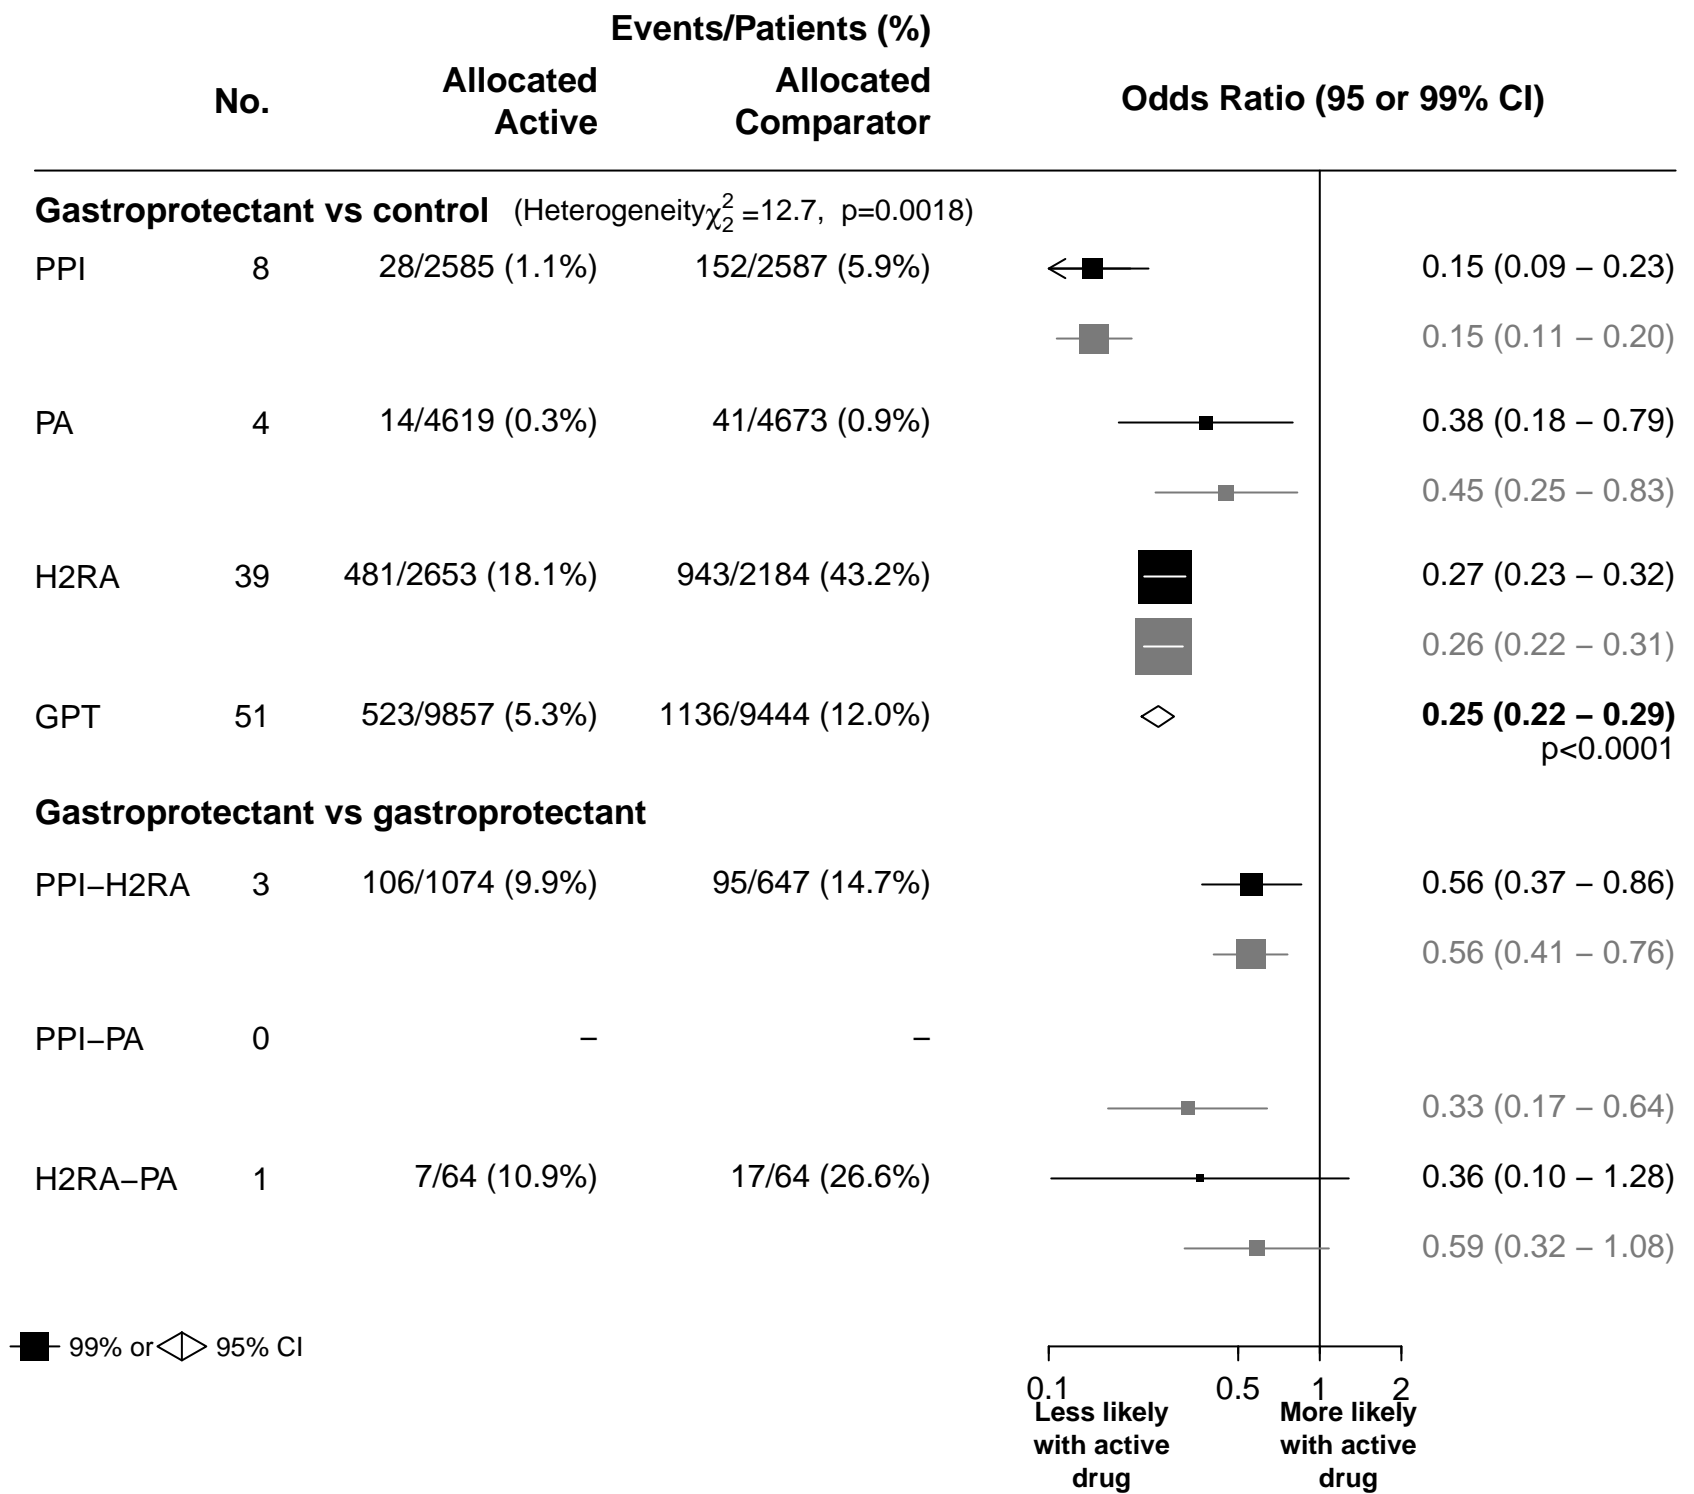

PPI=Proton pump inhibitors, PA=Prostaglandin analogues, H2RA=Histamine–2 receptor antagonists, GPT=Any gastroprotectant drug

Black squares and lines correspond to the direct treatment comparisons and grey squares and lines to the network meta-analysis estimates.

**Webfigure 16c: Prevention trials – effects of gastroprotectants on bleeds (direct vs network meta-analytic effect estimates)**

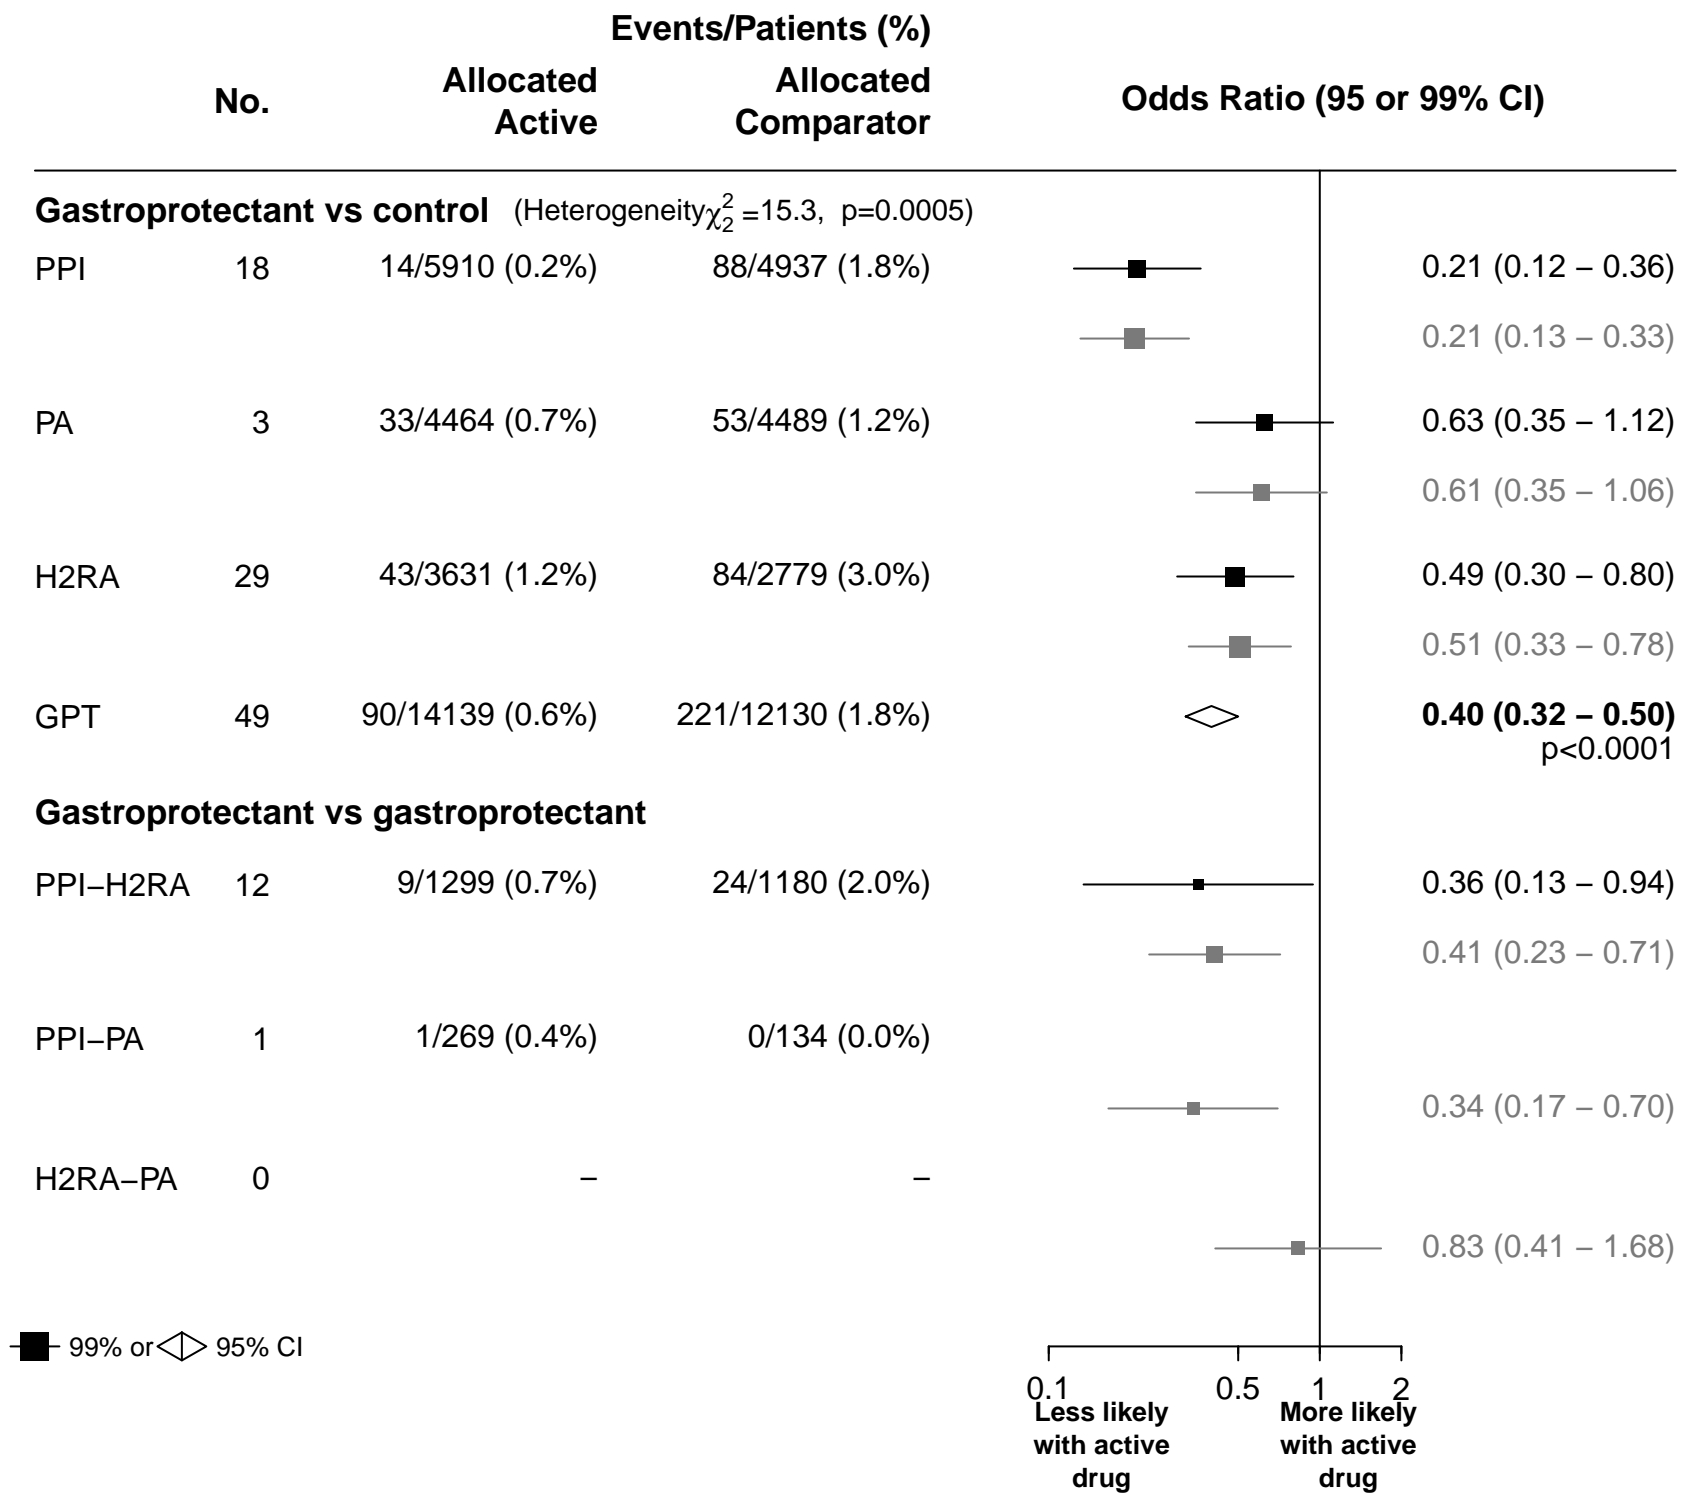

PPI=Proton pump inhibitors, PA=Prostaglandin analogues, H2RA=Histamine–2 receptor antagonists, GPT=Any gastroprotectant drug  
 Black squares and lines correspond to the direct treatment comparisons and grey squares and lines to the network meta-analysis estimates.

**Webfigure 16d: Prevention trials – effects of gastroprotectants on all-cause mortality (direct vs network meta-analytic effect estimates)**

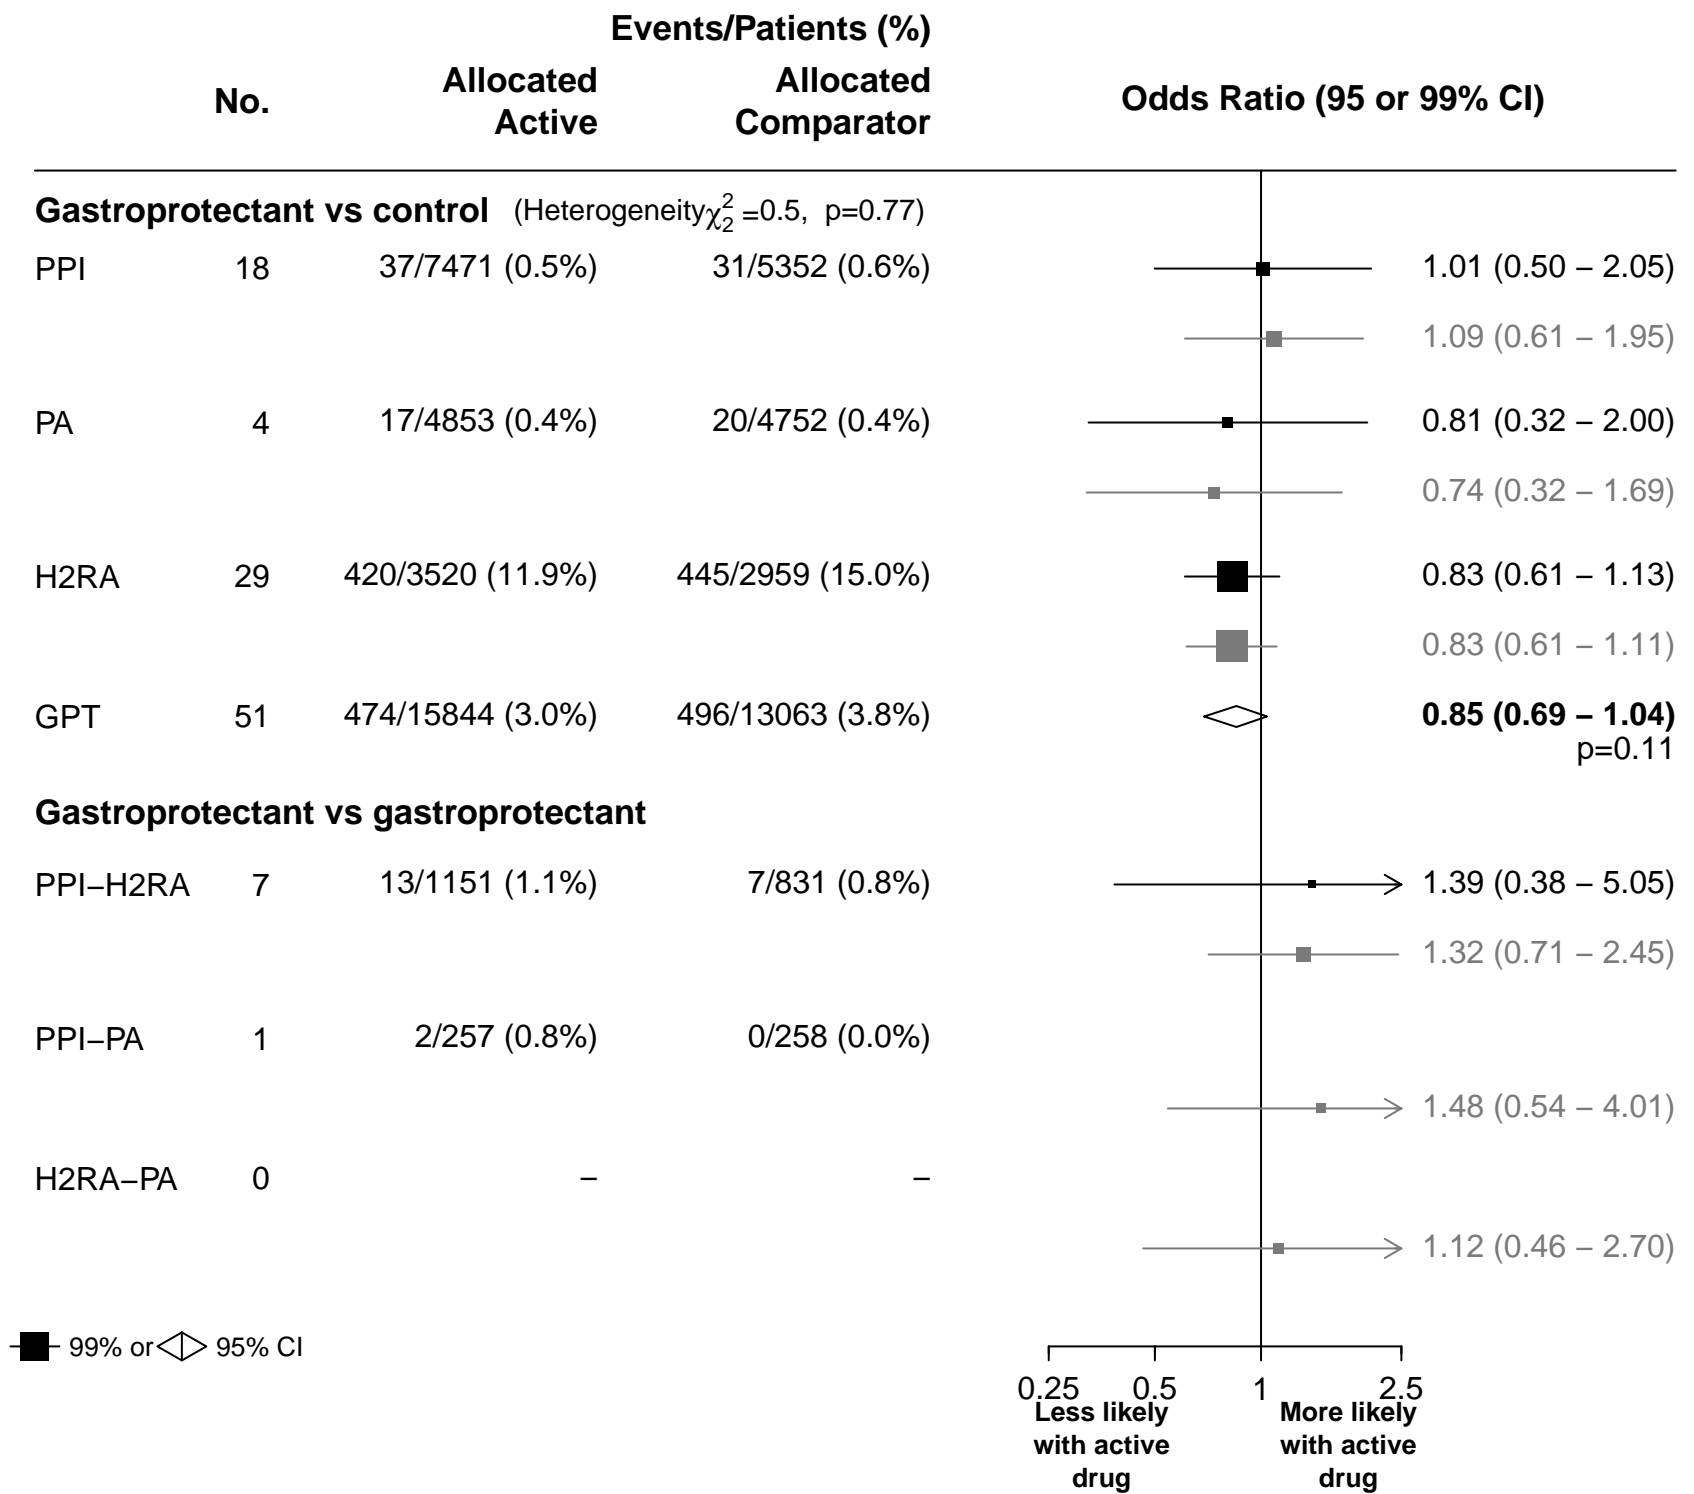

PPI=Proton pump inhibitors, PA=Prostaglandin analogues, H2RA=Histamine–2 receptor antagonists, GPT=Any gastroprotectant drug

Black squares and lines correspond to the direct treatment comparisons and grey squares and lines to the network meta-analysis estimates.

**Webfigure 16e: Healing trials – effects of gastroprotectants on endoscopic ulcer healing (direct vs network meta-analytic effect estimates)**

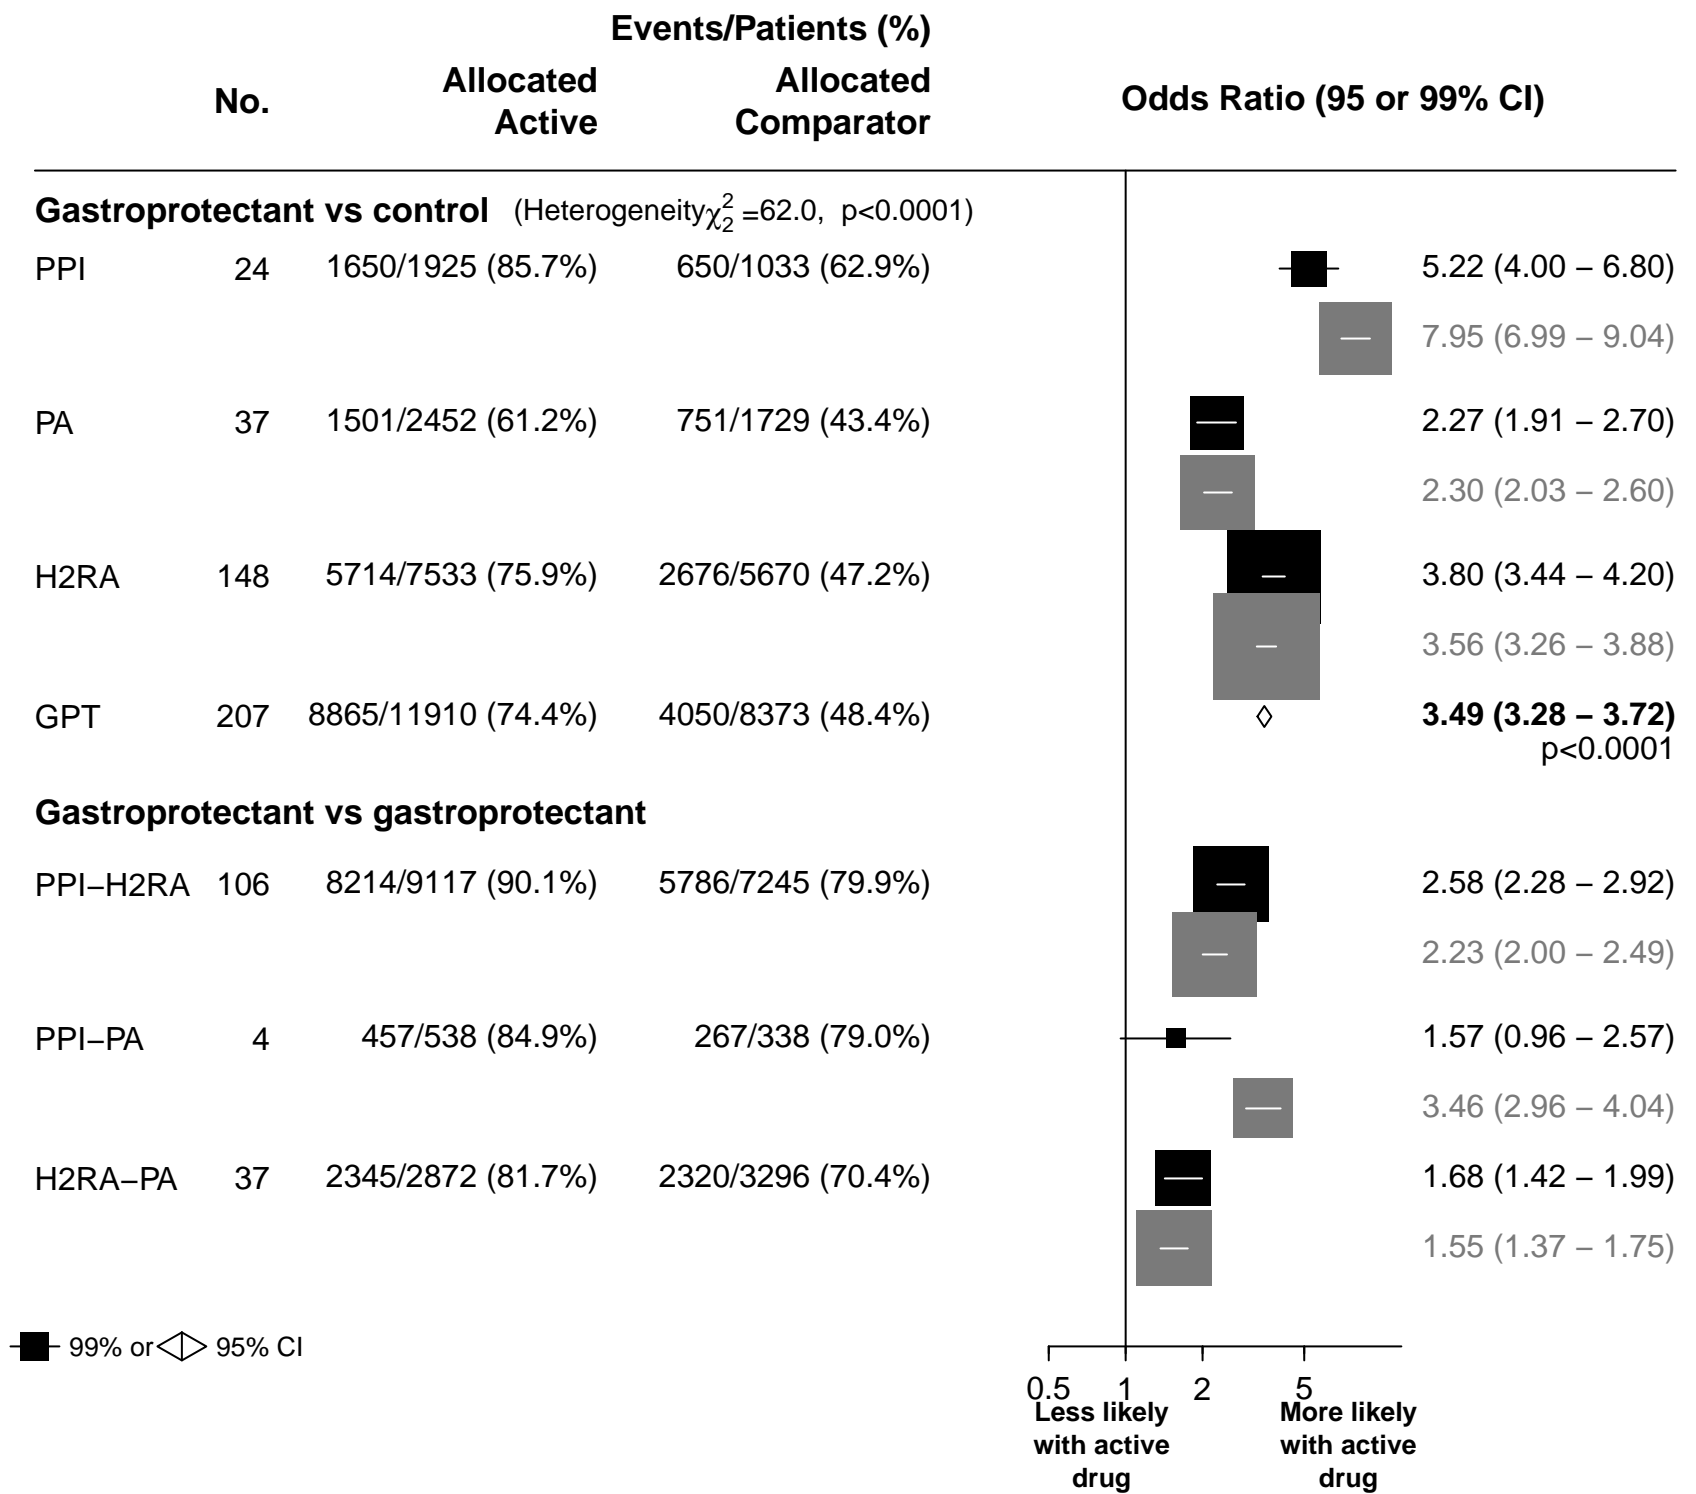

PPI=Proton pump inhibitors, PA=Prostaglandin analogues, H2RA=Histamine–2 receptor antagonists, GPT=Any gastroprotectant drug

Black squares and lines correspond to the direct treatment comparisons and grey squares and lines to the network meta-analysis estimates.

### Webfigure 16f: Acute UGI bleeding treatment trials – effects of gastroprotectants on further bleeding (direct vs network meta-analytic effect estimates)

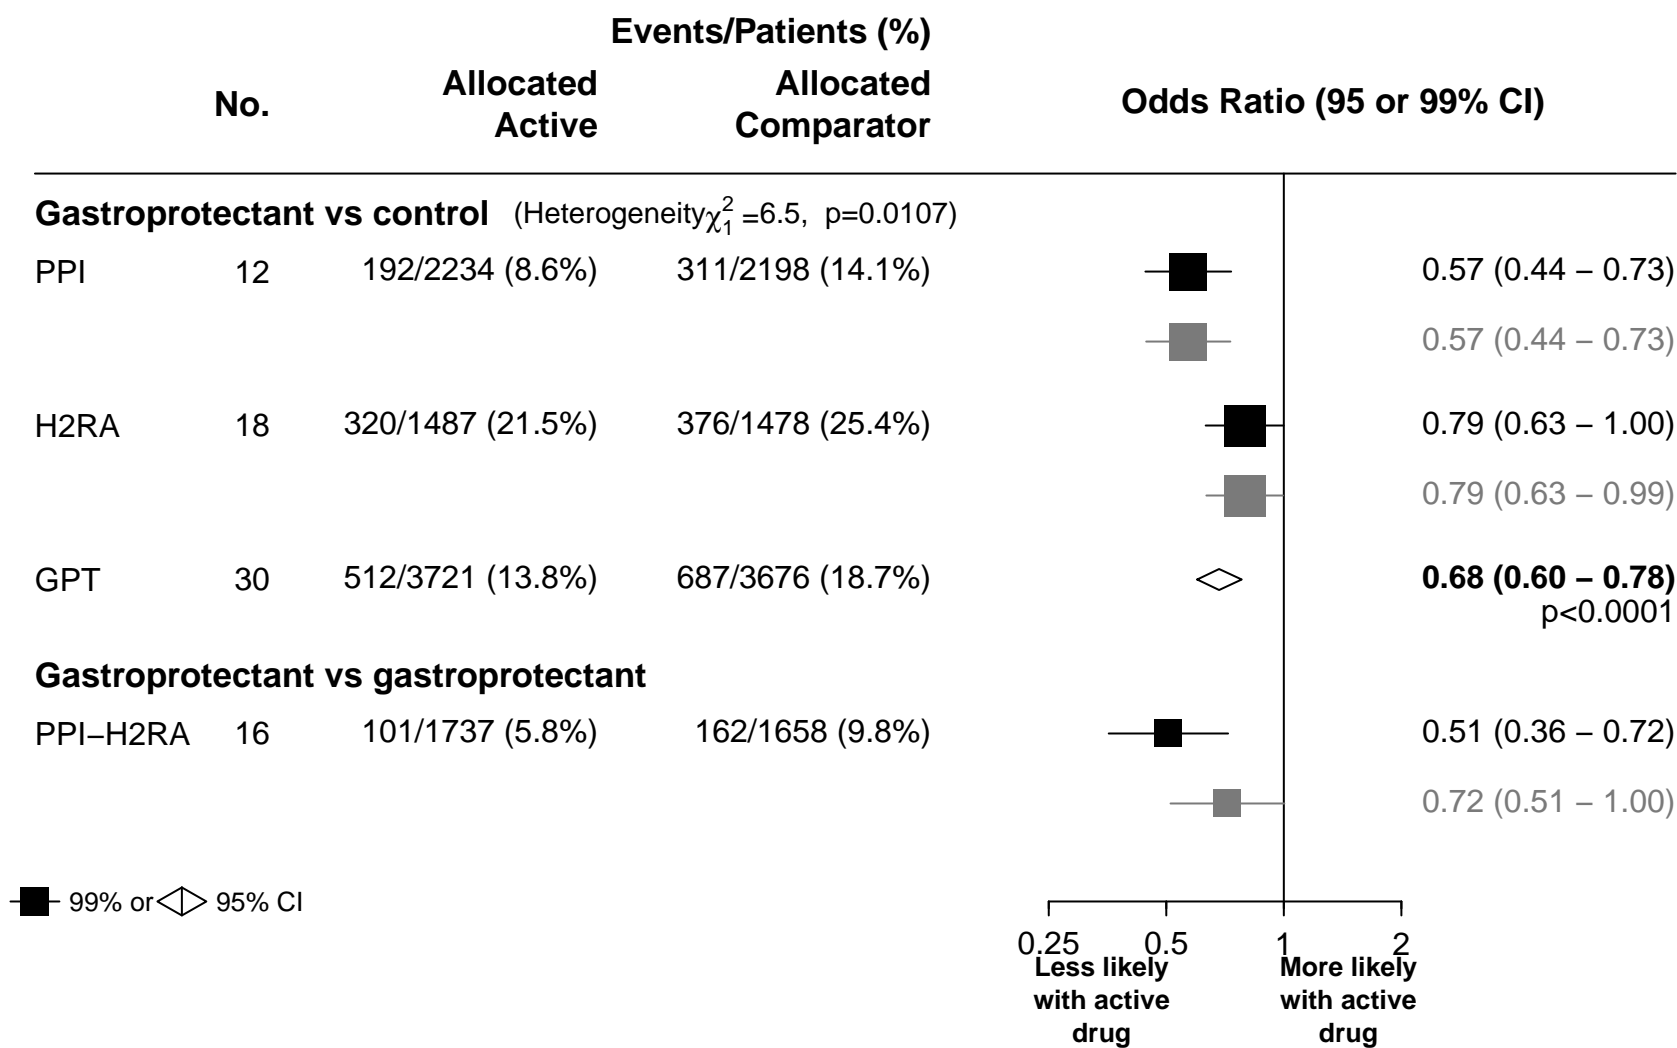

PPI=Proton pump inhibitors, H2RA=Histamine–2 receptor antagonists, GPT=Any gastroprotectant drug

Black squares and lines correspond to the direct treatment comparisons and grey squares and lines to the network meta-analysis estimates.

**Webfigure 16g: Acute UGI bleeding treatment trials – effects of gastroprotectants on blood transfusion (direct vs network meta–analytic effect estimates)**

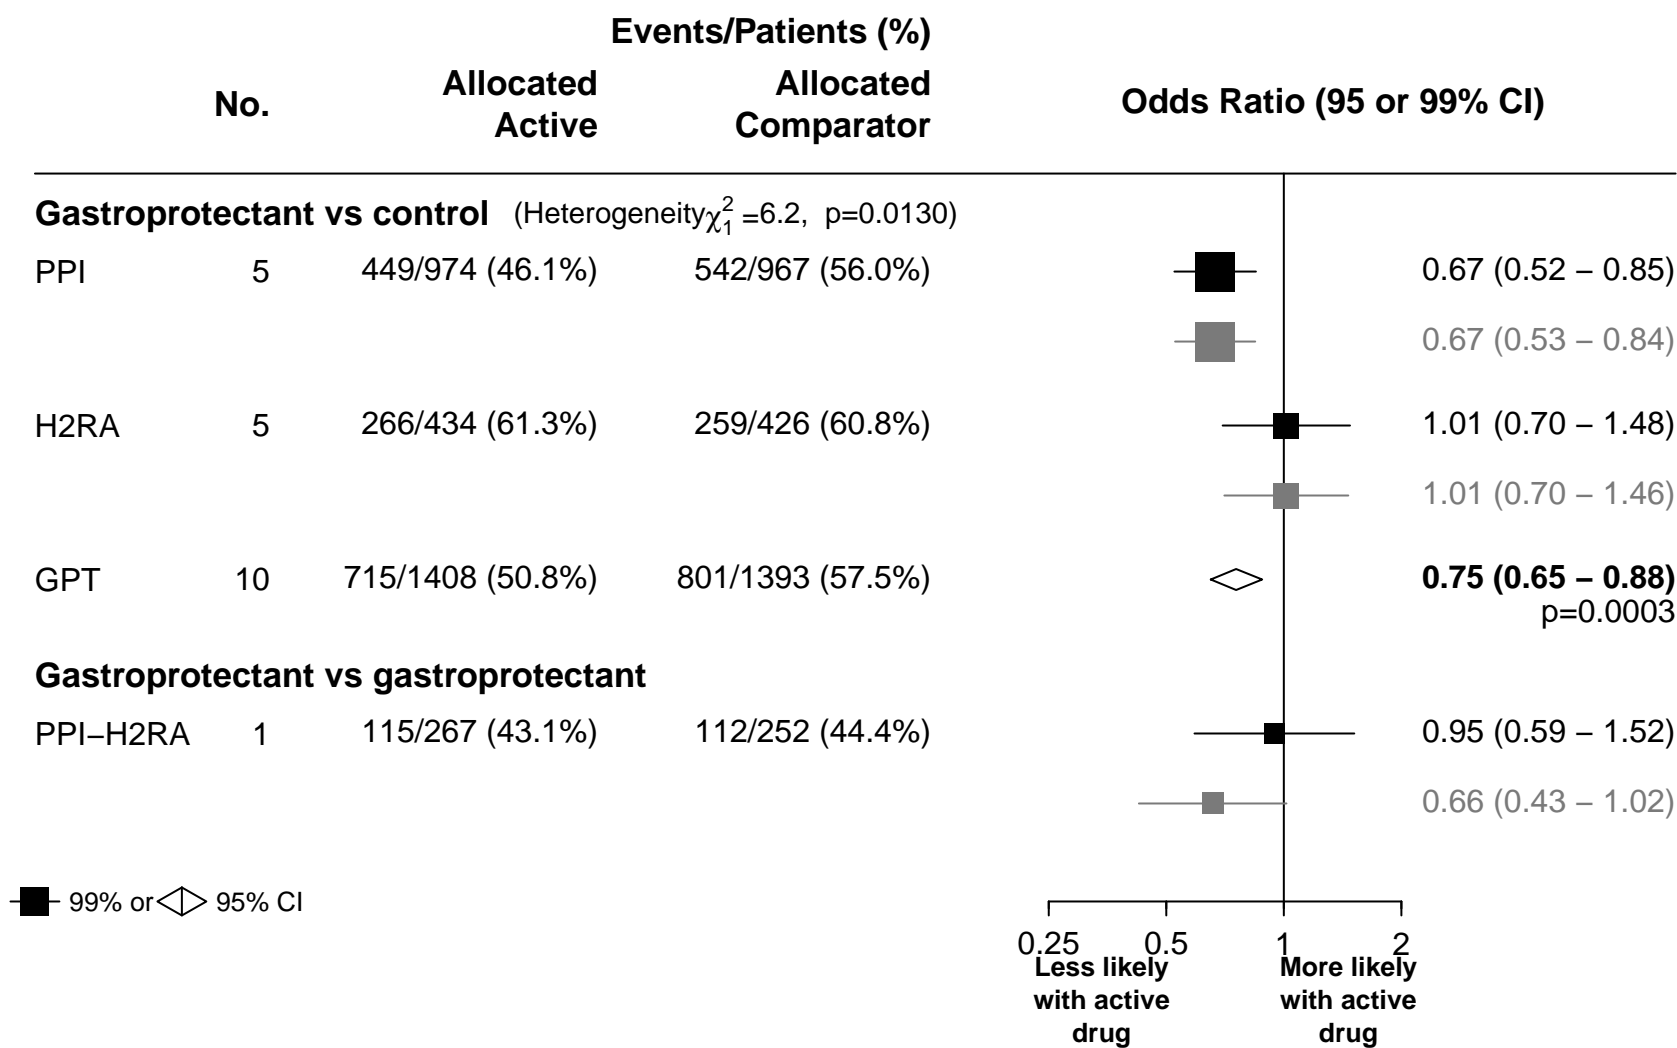

PPI=Proton pump inhibitors, H2RA=Histamine–2 receptor antagonists, GPT=Any gastroprotectant drug

Black squares and lines correspond to the direct treatment comparisons and grey squares and lines to the network meta–analysis estimates.



**Webfigure 16h: Acute UGI bleeding treatment trials – effects of gastroprotectants on surgery (direct vs network meta-analytic effect estimates)**

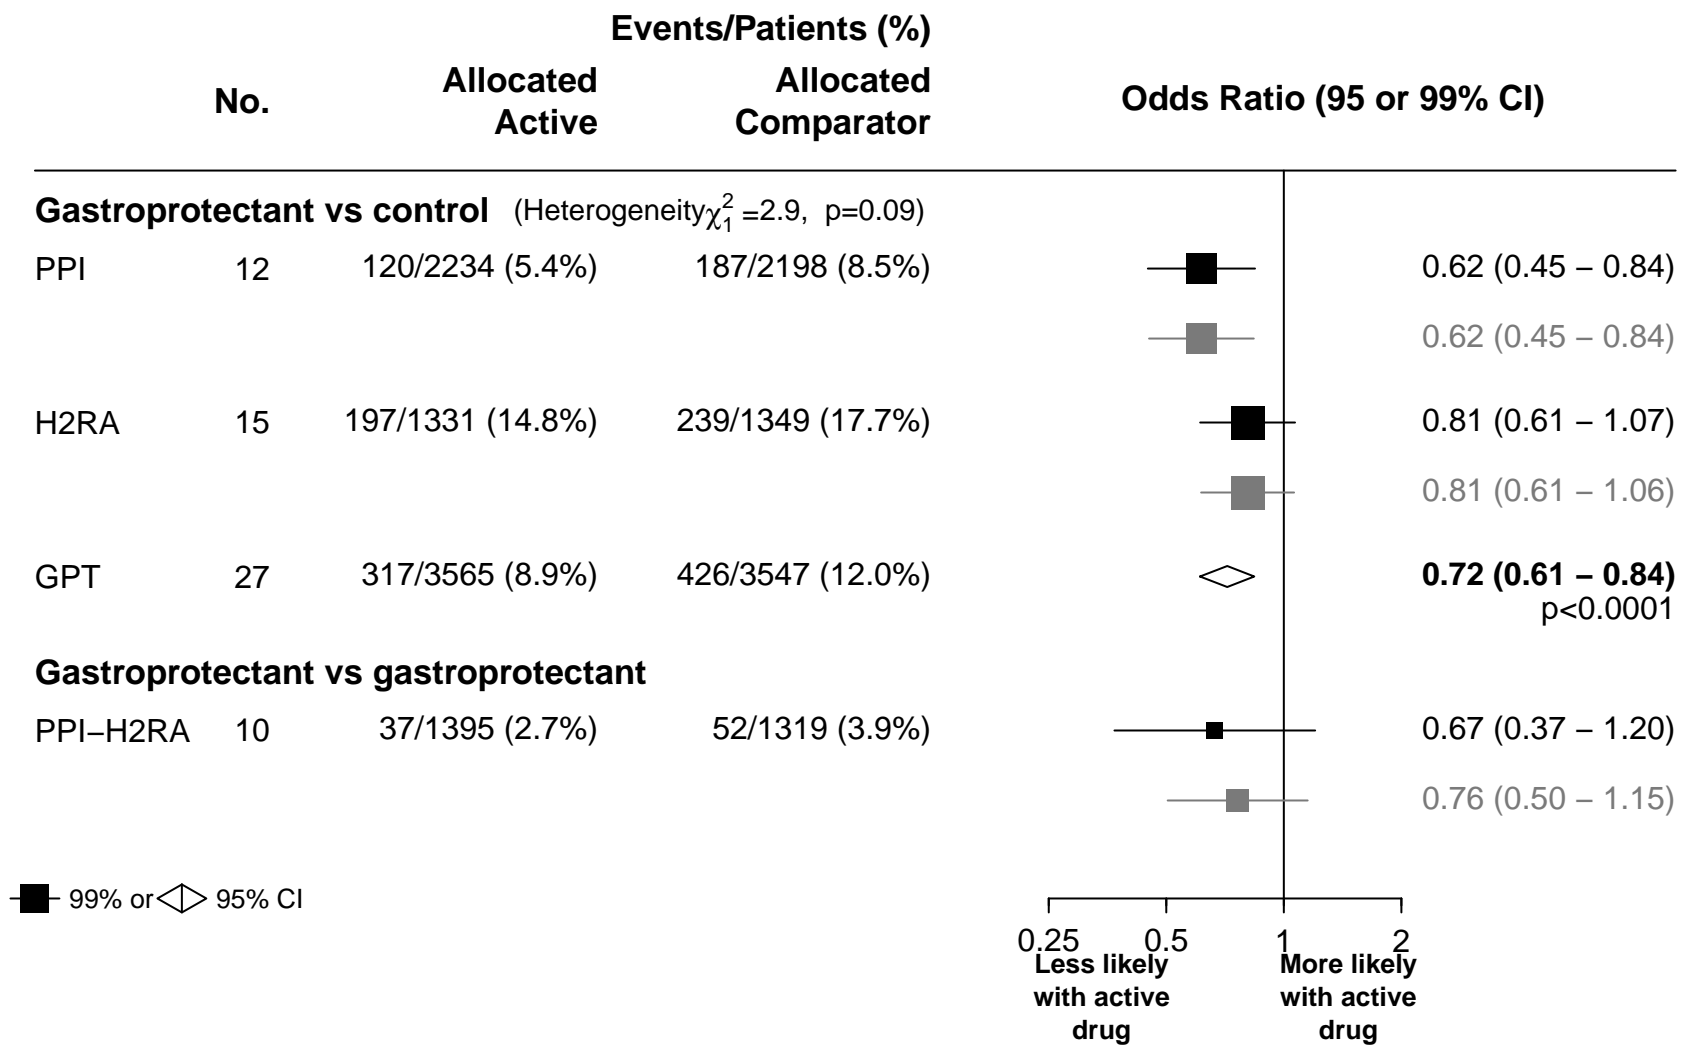

PPI=Proton pump inhibitors, H2RA=Histamine-2 receptor antagonists, GPT=Any gastroprotectant drug

Black squares and lines correspond to the direct treatment comparisons and grey squares and lines to the network meta-analysis estimates.

**Webfigure 16i: Acute UGI bleeding treatment trials – effects of gastroprotectants on all-cause mortality (direct vs network meta-analytic effect estimates)**

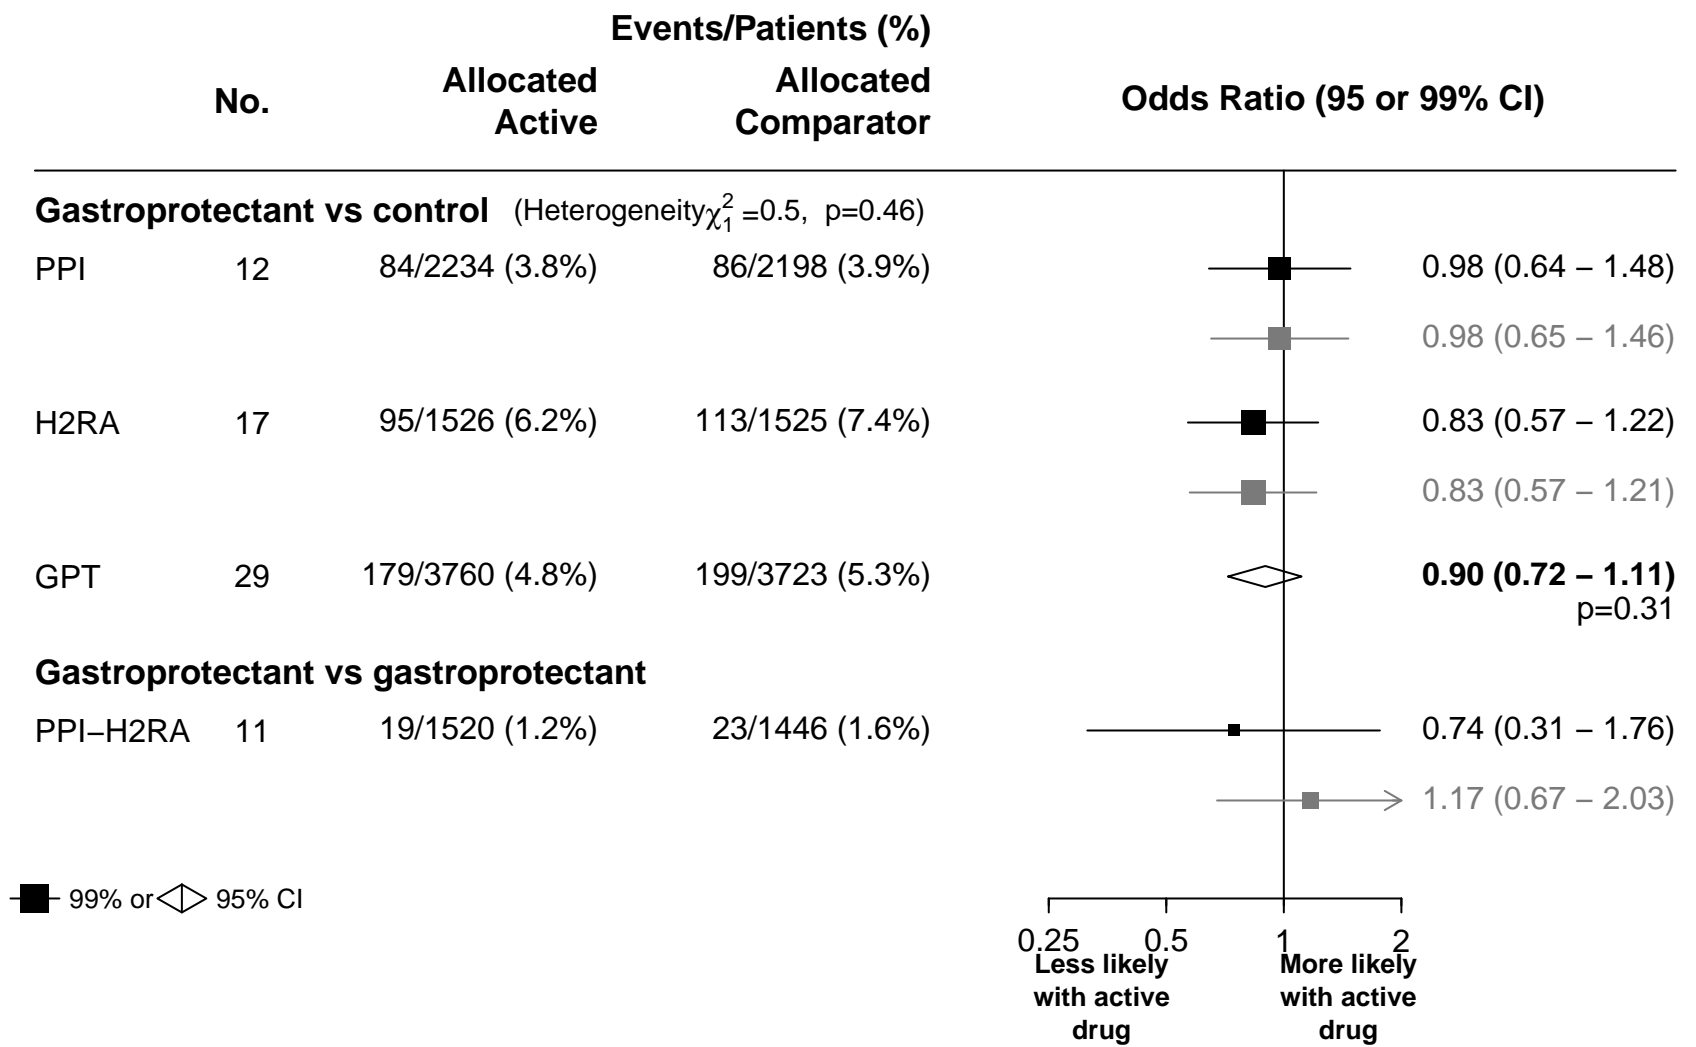

PPI=Proton pump inhibitors, H2RA=Histamine–2 receptor antagonists, GPT=Any gastroprotectant drug

Black squares and lines correspond to the direct treatment comparisons and grey squares and lines to the network meta-analysis estimates.

## Electronic Search Strategy

Medline and EMBASE were searched using OVID SP for all trial publications (including protocols, results papers, abstracts, conferences proceedings and reviews) by adapting the first Cochrane Search Strategy Design (Higgins & Green 2008<sup>1</sup>). No language restriction was applied to the search. The search was completed by LH and results were downloaded into EndNote X7 where duplicates were removed. The remaining references were initially screened on the basis of title with abstracts and full papers obtained where further information was required. Reasons for exclusion were recorded in custom fields in EndNote. The review of search results and extraction from eligible studies of pre-specified outcomes and key trial characteristics was done independently by two authors (always two of KD, HH, LH and KW). The extracted information was then entered directly into a customised database.

All eligibility criteria were decided *a priori*. Acceptable methods of concealment of allocation at the point of randomisation were: IVRS (Interactive Voice Response System); telephone central office; pharmacy coded containers administered sequentially; onsite computer accessible only after entering patient details; sealed envelopes sequentially numbered or opaque; sealed envelopes (no further information); closed list of random numbers and 'randomised', but method not specified. Acceptable methods of blinding were: double blind (subject and investigators unaware of allocation); single blind (subject only unaware of allocation); open (subjects and investigators aware of allocation) and not described (unknown).

**Medline Search** (Ovid MEDLINE(R) In-Process & Other Non-Indexed Citations and Ovid MEDLINE(R) 1950 to January Week 3 2016

1. proton pump inhibitor.mp.
2. (proton AND pump AND inhibitor).mp.
3. (proton AND pump AND inhibitors).mp.
4. Proton pump inhibitors/ OR proton pump inhibitors.mp.
5. PPI.mp.
6. PPIs.mp.
7. dexlansoprazole.mp.
8. esomeprazole.mp.
9. tenatoprazole.mp.
10. benatoprazole.mp.
11. rabeprazole.mp.
12. omeprazole.mp or omeprazole/
13. lansoprazole.mp.
14. pantoprazole.mp.
15. ilaprazole.mp.
16. AZD0865.mp.
17. histamine H2 receptor antagonist.mp.
18. histamine H2 receptor antagonists.mp.
19. (histamine AND H2 receptor AND antagonist).mp.
20. (histamine AND H2 receptor AND antagonist).mp.
21. histamine h2 antagonists/ OR histamine H2 antagonists.mp.
22. (histamine AND H2 AND antagonist).mp.
23. (histamine AND H2 AND antagonists).mp.
24. H2RA.mp.
25. H2RAs.mp.
26. cimetidine/ OR cimetidine.mp.
27. famotidine/ OR famotidine.mp.
28. ranitidine/ OR ranitidine.mp.
29. nizatidine/ OR nizatidine.mp.
30. lafutidine.mp.
31. roxatidine.mp.
32. prostaglandin E2 analogues.mp. OR Prostaglandin E2 analogue.mp.
33. Prostaglandins E, Synthetic/
34. (prostaglandin AND analogue AND E2).mp.
35. (prostaglandin AND analogues AND E2).mp.
36. PGE2 analogue.mp.
37. prostaglandin E2 derivative.mp.
38. (prostaglandin AND E2 AND derivative).mp.

39. (prostaglandin AND E2 AND derivatives).mp.
40. misoprostol/ OR misoprostol.mp.
41. rioprostil.mp. OR rioprostil/
42. arbaprostil/ OR arbaprostil.mp.
43. enprostil/ OR enprostil.mp.
44. rebamipide.mp.
45. /or 1-44
46. randomized controlled trial.pt.
47. controlled clinical trial.pt.
48. randomized.ab.
49. placebo.ab.
50. clinical trials as topic.sh.
51. randomly.ab.
52. trial.ti.
53. /or 46-52
54. exp animals/ not humans.sh.
55. 53 not 54
56. 45 and 55

**EMBASE** via OVID SP 1980 to 2016 Week 05

1. Proton pump inhibitor.mp. OR proton pump inhibitor/
2. Proton pump inhibitors.mp.
3. (proton AND pump AND inhibitor).mp.
4. (proton AND pump AND inhibitors).mp
5. PPI.mp.
6. PPIs.mp.
7. dexlansoprazole/ OR dexlansoprazole.mp.
8. esomeprazole.mp. OR esomeprazole/
9. tenatoprazole/ OR tenatoprazole.mp.
10. benatoprazole/ OR benatoprazole.mp.
11. rabeprazole/ OR rabeprazole.mp.
12. omeprazole/ OR omeprazole.mp.
13. lansoprazole/ OR lansoprazole.mp.
14. pantoprazole/ OR pantoprazole.mp.
15. ilaprazole.mp.
16. AZD0865.mp.
17. histamine H2 receptor antagonist.mp. OR histamine H2 receptor antagonist/
18. histamine H2 receptor antagonists.mp.
19. histamine H2 antagonists.mp. OR Histamine H2 Antagonists/
20. histamine H2 antagonist.mp. OR Histamine H2 Antagonist/
21. (histamine AND H2 receptor AND antagonist).mp.
22. (histamine AND H2 receptor AND antagonists).mp.
23. (histamine AND H2 AND antagonist).mp.
24. (histamine AND H2 AND antagonists).mp.
25. H2RA.mp.
26. H2RAs.mp.
27. cimetidine/ OR cimetidine.mp.
28. famotidine/ OR famotidine.mp.
29. ranitidine/ OR ranitidine.mp.
30. nizatidine/ OR nizatidine.mp.
31. lafutidine.mp.
32. roxatidine.mp.
33. prostaglandin E2 analogues.mp.
34. prostaglandin E2 analogue.mp.
35. (prostaglandin AND E2 AND analogue).mp.
36. (prostaglandin AND E2 AND analogues).mp.
37. PGE2 analogue.mp.
38. prostaglandin E2 derivative.mp. or prostaglandin E2 derivative/
39. (prostaglandin AND E2 AND derivative).mp.
40. (prostaglandin AND E2 AND derivatives).mp.

41. misoprostol/ OR misoprostol.mp.
42. rioprostil.mp. OR rioprostil/
43. arbaprostil/ OR arbaprostil.mp.
44. enprostil/ OR enprostil.mp.
45. rebamipide.mp.
46. /or 1-45
47. random\$.mp.
48. factorial\$.mp.
49. crossover\$.mp.
50. cross over\$.mp.
51. cross-over\$.mp.
52. placebo\$.mp.
53. (doubl\$ adj blind\$.mp.
54. (singl\$ adj blind\$.mp.
55. assign\$.mp
56. allocat\$.mp.
57. volunteer\$.mp. OR volunteer/
58. crossover procedure/
59. double-blind procedure/
60. randomized controlled trial/
61. single blind procedure/
62. /or 47-61
63. 62 and 46

Further suitable drugs were identified during publication processing. These were oxmetidine and ramixotidine and eligible trials using these drugs were included.

<sup>1</sup> Higgins JPT & Green S (editors). Cochrane Handbook for Systematic Reviews of Interventions Version 5.0.1 [updated September 2008]. The Cochrane Collaboration, 2008. Available from [www.cochrane-handbook.org](http://www.cochrane-handbook.org).

**Webtable 1: Details of trials involving a randomised comparison of a proton pump inhibitor (X) versus control (Y)**

| Trial name                          | Regimen | Ref. | Indication for treatment                          | Design    | Allocation Concealment | Blinding of investigators and patients | Availability of data | No. of patients |     |
|-------------------------------------|---------|------|---------------------------------------------------|-----------|------------------------|----------------------------------------|----------------------|-----------------|-----|
|                                     |         |      |                                                   |           |                        |                                        |                      | NX              | NY  |
| <b>Prevention Trials</b>            |         |      |                                                   |           |                        |                                        |                      |                 |     |
| <i>Dexlansoprazole vs Control</i>   |         |      |                                                   |           |                        |                                        |                      |                 |     |
| Metz 2009                           | 30 mg   | w1   | Gastro-oesophageal reflux                         | Parallel  | Telephone              | Double                                 | Yes                  | 140             | 147 |
| Fass 2011                           | 30 mg   | w2   | Gastro-oesophageal reflux                         | Parallel  | IVRS                   | Double                                 | Yes                  | 152             | 153 |
| Howden 2009                         | 60 mg   | w3   | Gastro-oesophageal reflux                         | Parallel  | IVRS                   | Double                                 | Yes                  | 159             | 140 |
| Metz 2009                           | 60 mg   | w1   | Gastro-oesophageal reflux                         | Parallel  | Telephone              | Double                                 | Yes                  | 158             | 147 |
| Howden 2009                         | 90 mg   | w3   | Gastro-oesophageal reflux                         | Parallel  | IVRS                   | Double                                 | Yes                  | 152             | 140 |
| <i>Esomeprazole vs Control</i>      |         |      |                                                   |           |                        |                                        |                      |                 |     |
| Johnson 2001                        | 10 mg   | w4   | Gastro-oesophageal reflux                         | Parallel  | Sealed envelopes       | Double                                 | Yes                  | 77              | 77  |
| Vakil 2001                          | 10 mg   | w5   | Gastro-oesophageal reflux                         | Parallel  | Sealed envelopes       | Double                                 | No                   | 91              | 94  |
| PLUTO                               | 20 mg   | w6   | Arthritis, rheumatic or musculoskeletal disorders | Parallel  | Closed list            | Double                                 | Yes                  | 195             | 192 |
| ASTERIX                             | 20 mg   | w7   | Antiplatelet therapy                              | Parallel  | Onsite computer        | Double                                 | Yes                  | 494             | 498 |
| VENUS                               | 20 mg   | w6   | Arthritis, rheumatic or musculoskeletal disorders | Parallel  | Other method           | Double                                 | Yes                  | 281             | 281 |
| NASA1                               | 20 mg   | w8   | Antiplatelet therapy                              | Parallel  | Unspecified method     | Double                                 | No                   | 195             | 207 |
| SPACE1                              | 20 mg   | w8   | Antiplatelet therapy                              | Parallel  | Unspecified method     | Double                                 | Yes                  | 187             | 189 |
| Johnson 2005                        | 20 mg   | w9   | Gastro-oesophageal reflux                         | Parallel  | Closed list            | Double                                 | No                   | 226             | 229 |
| Johnson 2001                        | 20 mg   | w4   | Gastro-oesophageal reflux                         | Parallel  | Sealed envelopes       | Double                                 | Yes                  | 82              | 77  |
| NASA2 and SPACE2                    | 20 mg   | w10  | Antiplatelet therapy                              | Parallel  | Closed list            | Double                                 | Yes                  | 202             | 212 |
| Katz 2003 A                         | 20 mg   | w11  | Gastro-oesophageal reflux                         | Parallel  | Sealed envelopes       | Double                                 | No                   | 121             | 124 |
| Vakil 2001                          | 20 mg   | w5   | Gastro-oesophageal reflux                         | Parallel  | Sealed envelopes       | Double                                 | No                   | 98              | 94  |
| Katz 2003 B                         | 20 mg   | w11  | Gastro-oesophageal reflux                         | Parallel  | Sealed envelopes       | Double                                 | No                   | 113             | 118 |
| Cheung 2013                         | 20 mg   | w12  | Gastro-oesophageal reflux                         | Parallel  | Unspecified method     | Double                                 | No                   | -               | -   |
| Hsu 2010                            | 20 mg   | w13  | Antiplatelet therapy                              | Parallel  | Unspecified method     | Unknown                                | Yes                  | 79              | 75  |
| Yu 2013 A                           | 20 mg   | w14  | Cardiovascular disease                            | Parallel  | Unspecified method     | Unknown                                | No                   | 122             | 148 |
| Tan 2011                            | 20 mg   | w15  | Gastro-oesophageal reflux                         | Parallel  | Sealed envelopes       | Double                                 | No                   | 85              | 90  |
| Esomeprazole NSAID Preventive Study | 20 mg   | w16  | Recently healed ulcers                            | Parallel  | Onsite computer        | Double                                 | Yes                  | 175             | 168 |
| Hsu 2012                            | 20 mg   | w17  | Recently healed ulcers                            | Parallel  | Unspecified method     | Unknown                                | Yes                  | 157             | 161 |
| LAVENDER                            | 20 mg   | w18  | Recently healed ulcers                            | Parallel  | Onsite computer        | Double                                 | Yes                  | 215             | 215 |
| Peura 2014 A                        | 20 mg   | w19  | Gastro-oesophageal reflux                         | Parallel  | Unspecified method     | Double                                 | Yes                  | 171             | 169 |
| Peura 2014 B                        | 20 mg   | w19  | Gastro-oesophageal reflux                         | Parallel  | Unspecified method     | Double                                 | Yes                  | 170             | 171 |
| Pilichiewicz 2013                   | 20 mg   | w20  | Gastro-oesophageal reflux                         | Factorial | Unspecified method     | Double                                 | No                   | -               | -   |
| Hsu 2011                            | 20 mg   | w21  | Recently healed ulcers                            | Parallel  | Sealed envelopes       | Open                                   | Yes                  | 83              | 82  |
| Faruqi 2011                         | 20 mg   | w22  | Chronic cough                                     | Parallel  | Unspecified method     | Double                                 | Yes                  | 26              | 25  |
| OBERON                              | 20 mg   | w23  | Antiplatelet therapy                              | Parallel  | Sealed envelopes       | Double                                 | Yes                  | 804             | 805 |
| Johnson 2010                        | 20 mg   | w24  | Gastro-oesophageal reflux                         | Parallel  | Unspecified method     | Double                                 | Yes                  | 143             | 133 |
| Reimer 2009                         | 40 mg   | w25  | Healthy volunteers                                | Parallel  | Sealed envelopes       | Double                                 | No                   | 60              | 60  |
| Wilder-Smith 2009                   | 40 mg   | w26  | Dental                                            | Parallel  | Closed list            | Double                                 | Yes                  | 15              | 15  |
| PLUTO                               | 40 mg   | w6   | Arthritis, rheumatic or musculoskeletal disorders | Parallel  | Closed list            | Double                                 | Yes                  | 198             | 192 |
| VENUS                               | 40 mg   | w6   | Arthritis, rheumatic or musculoskeletal disorders | Parallel  | Other method           | Double                                 | Yes                  | 282             | 281 |
| Chan 2007                           | 40 mg   | w27  | Arthritis, rheumatic or musculoskeletal disorders | Parallel  | Pharmacy               | Double                                 | Yes                  | 137             | 136 |
| NASA1                               | 40 mg   | w8   | Antiplatelet therapy                              | Parallel  | Unspecified method     | Double                                 | No                   | 206             | 207 |
| SPACE1                              | 40 mg   | w8   | Antiplatelet therapy                              | Parallel  | Unspecified method     | Double                                 | Yes                  | 180             | 189 |
| Johnson 2005                        | 40 mg   | w9   | Gastro-oesophageal reflux                         | Parallel  | Closed list            | Double                                 | No                   | 220             | 229 |
| Johnson 2001                        | 40 mg   | w4   | Gastro-oesophageal reflux                         | Parallel  | Sealed envelopes       | Double                                 | Yes                  | 82              | 77  |
| Fass 2010                           | 40 mg   | w28  | Gastro-oesophageal reflux                         | Parallel  | Unspecified method     | Double                                 | No                   | 24              | 17  |
| Johnsson 2003                       | 40 mg   | w29  | Gastro-oesophageal reflux                         | Parallel  | Unspecified method     | Double                                 | No                   | 176             | 92  |
| Johnsson 2003                       | 40 mg   | w29  | Gastro-oesophageal reflux                         | Parallel  | Unspecified method     | Double                                 | No                   | 172             | 92  |
| NASA2 and SPACE2                    | 40 mg   | w10  | Antiplatelet therapy                              | Parallel  | Closed list            | Double                                 | Yes                  | 196             | 212 |
| Katz 2003 A                         | 40 mg   | w11  | Gastro-oesophageal reflux                         | Parallel  | Sealed envelopes       | Double                                 | No                   | 123             | 124 |
| Van Zanten 2006                     | 40 mg   | w30  | Gastro-oesophageal reflux                         | Parallel  | Unspecified method     | Double                                 | Yes                  | 109             | 115 |
| Vakil 2001                          | 40 mg   | w5   | Gastro-oesophageal reflux                         | Parallel  | Sealed envelopes       | Double                                 | No                   | 92              | 94  |

**Webtable 1 (cont.): Details of trials involving a randomized comparison of a proton pump inhibitor (X) versus control (Y)**

| Trial name                                                | Regimen | Ref. | Indication for treatment  | Design    | Allocation Concealment | Blinding of investigators and patients | Availability of data | No. of patients |     |
|-----------------------------------------------------------|---------|------|---------------------------|-----------|------------------------|----------------------------------------|----------------------|-----------------|-----|
|                                                           |         |      |                           |           |                        |                                        |                      | NX              | NY  |
| Reichel 2008                                              | 40 mg   | w31  | Gastro-oesophageal reflux | Parallel  | Unspecified method     | Double                                 | Yes                  | 32              | 30  |
| Talley 2007                                               | 40 mg   | w32  | Gastro-oesophageal reflux | Parallel  | Other method           | Double                                 | Yes                  | 1065            | 524 |
| Yi 2008                                                   | 40 mg   | w33  | Gastro-oesophageal reflux | Parallel  | Unspecified method     | Unknown                                | No                   | 15              | 13  |
| Kiljander 2010                                            | 40 mg   | w34  | Asthma                    | Parallel  | Unspecified method     | Double                                 | Yes                  | 313             | 328 |
| Katz 2003 B                                               | 40 mg   | w11  | Gastro-oesophageal reflux | Parallel  | Sealed envelopes       | Double                                 | No                   | 118             | 118 |
| Hove 2013                                                 | 40 mg   | w35  | Diabetes                  | Factorial | Sealed envelopes       | Double                                 | Yes                  | 20              | 21  |
| Fernando 2011                                             | 40 mg   | w36  | Acute coronary syndrome   | Crossover | Pharmacy               | Double                                 | No                   | 16              | 16  |
| Liuzzo 2011                                               | 40 mg   | w37  | Cardiovascular disease    | Parallel  | Pharmacy               | Double                                 | No                   | 78              | 84  |
| Meineche-Schmidt 2011                                     | 40 mg   | w38  | Gastro-oesophageal reflux | Parallel  | Sealed envelopes       | Double                                 | No                   | 410             | 397 |
| OBERON                                                    | 40 mg   | w23  | Antiplatelet therapy      | Parallel  | Sealed envelopes       | Double                                 | Yes                  | 817             | 805 |
| PN400-301                                                 | 40 mg   | w39  | Antiplatelet therapy      | Parallel  | IVRS                   | Double                                 | Yes                  | 218             | 220 |
| Study PN400-302                                           | 40 mg   | w40  | Antiplatelet therapy      | Parallel  | IVRS                   | Double                                 | Yes                  | 212             | 211 |
| Andersson 2014                                            | 40 mg   | w41  | Healthy volunteers        | Crossover | Onsite computer        | Unknown                                | Yes                  | 27              | 27  |
| Jiang 2013                                                | 40 mg   | w42  | Gastro-oesophageal reflux | Parallel  | Unspecified method     | Unknown                                | Yes                  | 60              | 60  |
| America Lung Association Asthma Clinical Research Centers | 80 mg   | w43  | Asthma                    | Parallel  | Unspecified method     | Double                                 | Yes                  | 208             | 204 |
| Vaezi 2006                                                | 80 mg   | w44  | Gastro-oesophageal reflux | Parallel  | Unspecified method     | Double                                 | No                   | 95              | 51  |
| Kiljander 2006                                            | 80 mg   | w45  | Asthma                    | Parallel  | Unspecified method     | Unknown                                | Yes                  | 387             | 383 |
| Kiljander 2010                                            | 80 mg   | w34  | Asthma                    | Parallel  | Unspecified method     | Double                                 | Yes                  | 320             | 328 |
| DiMango 2014                                              | 80 mg   | w46  | Gastro-oesophageal reflux | Parallel  | Unspecified method     | Double                                 | No                   | 9               | 8   |
| Shaheen 2011                                              | 80 mg   | w47  | Chronic cough             | Parallel  | Unspecified method     | Double                                 | Yes                  | 22              | 18  |
| STARS II                                                  | 160 mg  | w48  | Gastro-oesophageal reflux | Parallel  | Closed list            | Double                                 | Yes                  | 822             | 428 |
| Byun 2015                                                 | Unknown | w49  | Chronic cough             | Parallel  | Unspecified method     | Double                                 | No                   | -               | -   |
| Byun 2015                                                 | Unknown | w49  | Chronic cough             | Parallel  | Unspecified method     | Double                                 | No                   | -               | -   |
| <b>Lansoprazole vs Control</b>                            |         |      |                           |           |                        |                                        |                      |                 |     |
| Peura 2009 A                                              | 15 mg   | w50  | Gastro-oesophageal reflux | Parallel  | Other method           | Double                                 | Yes                  | 291             | 284 |
| Graham 2002                                               | 15 mg   | w51  | Recently healed ulcers    | Parallel  | Other method           | Double                                 | Yes                  | 136             | 134 |
| Wong 2002                                                 | 15 mg   | w52  | Gastro-oesophageal reflux | Parallel  | Sealed envelopes       | Double                                 | No                   | 152             | 152 |
| Hongo 2008 B                                              | 15 mg   | w53  | Gastro-oesophageal reflux | Parallel  | Unspecified method     | Double                                 | No                   | 70              | 72  |
| Kushner 2009                                              | 15 mg   | w54  | Gastro-oesophageal reflux | Parallel  | Unspecified method     | Double                                 | No                   | 570             | 564 |
| Peura 2004                                                | 15 mg   | w55  | Gastro-oesophageal reflux | Parallel  | Onsite computer        | Double                                 | No                   | 305             | 308 |
| Sasaki 2009                                               | 15 mg   | w56  | COPD                      | Parallel  | Closed list            | Single                                 | No                   | 51              | 52  |
| Kovacs 1999                                               | 15 mg   | w57  | Recently healed ulcers    | Parallel  | Unspecified method     | Double                                 | Yes                  | 15              | 19  |
| Müller 1997                                               | 15 mg   | w58  | Healthy volunteers        | Parallel  | Unspecified method     | Double                                 | No                   | 10              | 10  |
| Earnest 1998                                              | 15 mg   | w59  | Gastro-oesophageal reflux | Parallel  | Unspecified method     | Double                                 | No                   | 72              | 66  |
| Castell 1996                                              | 15 mg   | w60  | Gastro-oesophageal reflux | Parallel  | Unspecified method     | Double                                 | Yes                  | 218             | 213 |
| Lanza 1997                                                | 15 mg   | w61  | Recently healed ulcers    | Parallel  | Unspecified method     | Double                                 | Yes                  | 92              | 88  |
| Kovacs 1998                                               | 15 mg   | w62  | Recently healed ulcers    | Parallel  | Unspecified method     | Double                                 | Yes                  | 19              | 15  |
| Sontag 1996                                               | 15 mg   | w63  | Gastro-oesophageal reflux | Parallel  | Unspecified method     | Double                                 | No                   | 53              | 56  |
| Robinson 1996                                             | 15 mg   | w64  | Gastro-oesophageal reflux | Parallel  | Unspecified method     | Double                                 | No                   | 60              | 57  |
| Richter 1999                                              | 15 mg   | w65  | Gastro-oesophageal reflux | Parallel  | Unspecified method     | Double                                 | No                   | 82              | 44  |
| Russo 1997 X3                                             | 15 mg   | w66  | Recently healed ulcers    | Extension | Closed list            | Double                                 | Yes                  | 30              | 28  |
| Richter 2000 C                                            | 15 mg   | w67  | Gastro-oesophageal reflux | Parallel  | Unspecified method     | Double                                 | No                   | 284             | 70  |
| ELF Study                                                 | 15 mg   | w68  | Gastro-oesophageal reflux | Parallel  | Onsite computer        | Double                                 | No                   | 24              | 30  |
| Peura 2009 A                                              | 30 mg   | w50  | Gastro-oesophageal reflux | Parallel  | Closed list            | Double                                 | Yes                  | 277             | 284 |
| Graham 2002                                               | 30 mg   | w51  | Recently healed ulcers    | Parallel  | Other method           | Double                                 | Yes                  | 133             | 134 |
| Wong 2002                                                 | 30 mg   | w52  | Gastro-oesophageal reflux | Parallel  | Sealed envelopes       | Double                                 | No                   | 149             | 152 |
| Hongo 2008 B                                              | 30 mg   | w53  | Gastro-oesophageal reflux | Parallel  | Unspecified method     | Double                                 | No                   | 78              | 72  |
| Petite 1991 A                                             | 30 mg   | w69  | Healthy volunteers        | Crossover | Unspecified method     | Double                                 | Yes                  | 5               | 5   |
| Peura 2004                                                | 30 mg   | w55  | Gastro-oesophageal reflux | Parallel  | Onsite computer        | Double                                 | No                   | 308             | 308 |
| Kovacs 1999                                               | 30 mg   | w57  | Recently healed ulcers    | Parallel  | Unspecified method     | Double                                 | Yes                  | 18              | 19  |
| Earnest 1998                                              | 30 mg   | w59  | Gastro-oesophageal reflux | Parallel  | Unspecified method     | Double                                 | No                   | 71              | 66  |
| Bell 2000                                                 | 30 mg   | w70  | Healthy volunteers        | Parallel  | Unspecified method     | Double                                 | No                   | 7               | 8   |

**Webtable 1 (cont.): Details of trials involving a randomized comparison of a proton pump inhibitor (X) versus control (Y)**

| Trial name                          | Regimen | Ref. | Indication for treatment                          | Design    | Allocation Concealment | Blinding of investigators and patients | Availability of data | No. of patients |      |
|-------------------------------------|---------|------|---------------------------------------------------|-----------|------------------------|----------------------------------------|----------------------|-----------------|------|
|                                     |         |      |                                                   |           |                        |                                        |                      | NX              | NY   |
| Castell 1996                        | 30 mg   | w60  | Gastro-oesophageal reflux                         | Parallel  | Unspecified method     | Double                                 | Yes                  | 422             | 213  |
| Brummer 1997                        | 30 mg   | w71  | Healthy volunteers                                | Crossover | Unspecified method     | Double                                 | No                   | 5               | 5    |
| Dumper J 2008                       | 30 mg   | w72  | Globus                                            | Parallel  | Other method           | Double                                 | No                   | 19              | 21   |
| Gaetani 1995                        | 30 mg   | w73  | Healthy volunteers                                | Crossover | Unspecified method     | Double                                 | No                   | 6               | 6    |
| Jang 2003                           | 30 mg   | w74  | Pancreaticoduodenectomy (Whipple's procedure)     | Parallel  | Unspecified method     | Unknown                                | No                   | 18              | 19   |
| Lai 2003                            | 30 mg   | w75  | Recently healed ulcers                            | Parallel  | Closed list            | Open                                   | Yes                  | 22              | 21   |
| Pakozdi 2009                        | 30 mg   | w76  | Multiple sclerosis                                | Parallel  | Unspecified method     | Double                                 | Yes                  | 11              | 10   |
| Kovacs 1998                         | 30 mg   | w62  | Recently healed ulcers                            | Parallel  | Unspecified method     | Double                                 | Yes                  | 15              | 15   |
| Sontag 1996                         | 30 mg   | w63  | Gastro-oesophageal reflux                         | Parallel  | Unspecified method     | Double                                 | No                   | 54              | 56   |
| Robinson 1996                       | 30 mg   | w64  | Gastro-oesophageal reflux                         | Parallel  | Unspecified method     | Double                                 | No                   | 56              | 57   |
| Richter 1999                        | 30 mg   | w65  | Gastro-oesophageal reflux                         | Parallel  | Unspecified method     | Double                                 | No                   | 88              | 44   |
| Richter 2000 C                      | 30 mg   | w67  | Gastro-oesophageal reflux                         | Parallel  | Unspecified method     | Double                                 | No                   | 288             | 70   |
| Xia 2003                            | 30 mg   | w77  | Gastro-oesophageal reflux                         | Parallel  | Unspecified method     | Single                                 | No                   | 36              | 34   |
| Leung 2007                          | 30 mg   | w78  | Gastro-oesophageal reflux                         | Parallel  | Sealed envelopes       | Double                                 | No                   | 78              | 79   |
| Lai 2002                            | 30 mg   | w79  | Antiplatelet therapy                              | Parallel  | Closed list            | Double                                 | Yes                  | 62              | 61   |
| DOSAPI                              | 30 mg   | w80  | Cardiovascular disease                            | Parallel  | Unspecified method     | Double                                 | No                   | 40              | 42   |
| Talwar 2010                         | 30 mg   | w81  | Cardiovascular disease                            | Crossover | Unspecified method     | Double                                 | No                   | 57              | 51   |
| Zhang 2015                          | 30 mg   | w82  | Antiplatelet therapy                              | Parallel  | Unspecified method     | Open                                   | Yes                  | 27              | 26   |
| Feng 2014                           | 30 mg   | w83  | Gastro-oesophageal reflux                         | Parallel  | Unspecified method     | Unknown                                | Yes                  | 59              | 59   |
| Fletcher 2011                       | 30 mg   | w84  | Gastro-oesophageal reflux                         | Parallel  | Unspecified method     | Unknown                                | No                   | 70              | 35   |
| Jones 2010                          | 30 mg   | w85  | Gastro-oesophageal reflux                         | Parallel  | Unspecified method     | Double                                 | No                   | 69              | 33   |
| Adamopoulos 2009                    | 40 mg   | w86  | Antiplatelet therapy                              | Crossover | Unspecified method     | Open                                   | No                   | 16              | 16   |
| Littner 2005                        | 60 mg   | w87  | Asthma                                            | Parallel  | Unspecified method     | Double                                 | No                   | 99              | 108  |
| Havas 1999                          | 60 mg   | w88  | Sore throat                                       | Parallel  | Unspecified method     | Double                                 | Yes                  | 8               | 7    |
| Earnest 1998                        | 60 mg   | w59  | Gastro-oesophageal reflux                         | Parallel  | Unspecified method     | Double                                 | No                   | 79              | 66   |
| El-Serag 2001                       | 60 mg   | w89  | Sore throat                                       | Parallel  | Onsite computer        | Double                                 | No                   | 12              | 10   |
| Borjesson 2003                      | 60 mg   | w90  | Nutcracker oesophagus                             | Crossover | Unspecified method     | Double                                 | No                   | 7               | 12   |
| Fuchs 1994                          | 60 mg   | w91  | Healthy volunteers                                | Crossover | Unspecified method     | Single                                 | No                   | 12              | 12   |
| Meikle 1994                         | 60 mg   | w92  | Healthy volunteers                                | Parallel  | Unspecified method     | Double                                 | No                   | 18              | 16   |
| Vaezi 2010                          | 60 mg   | w93  | Post nasal drip                                   | Parallel  | Unspecified method     | Double                                 | Yes                  | 36              | 39   |
| Andersson 2014                      | 60 mg   | w41  | Healthy volunteers                                | Crossover | Onsite computer        | Unknown                                | Yes                  | 27              | 27   |
| Takahiko 2011                       | Unknown | w94  | COPD                                              | Parallel  | Unspecified method     | Open                                   | No                   | 50              | 50   |
| Takebayashi 2014                    | Unknown | w95  | Diabetes                                          | Parallel  | Onsite computer        | Open                                   | No                   | 50              | 50   |
| Inukai 2015                         | Unknown | w96  | Diabetes                                          | Parallel  | Unspecified method     | Open                                   | No                   | 46              | 43   |
| <b><i>Omeprazole vs Control</i></b> |         |      |                                                   |           |                        |                                        |                      |                 |      |
| Farup 1999                          | 10 mg   | w97  | Gastro-oesophageal reflux                         | Parallel  | Unspecified method     | Double                                 | No                   | 6               | 10   |
| Bardhan 1998                        | 10 mg   | w98  | Gastro-oesophageal reflux                         | Extension | Closed list            | Double                                 | No                   | 130             | 133  |
| Talley 1998 A                       | 10 mg   | w99  | Gastro-oesophageal reflux                         | Parallel  | Closed list            | Double                                 | No                   | 409             | 426  |
| Lauritsen 1991                      | 10 mg   | w100 | Recently healed ulcers                            | Parallel  | Closed list            | Double                                 | Yes                  | 64              | 66   |
| Carlsson 1998 (no oesophagitis)     | 10 mg   | w101 | Gastro-oesophageal reflux                         | Parallel  | Unspecified method     | Double                                 | No                   | 86              | 88   |
| Bate 1995                           | 10 mg   | w102 | Gastro-oesophageal reflux                         | Parallel  | Unspecified method     | Double                                 | Yes                  | 61              | 63   |
| Allgood 2005                        | 10 mg   | w103 | Gastro-oesophageal reflux                         | Parallel  | Unspecified method     | Double                                 | Yes                  | 1038            | 1053 |
| Blum 2000                           | 10 mg   | w104 | Gastro-oesophageal reflux                         | Parallel  | Unspecified method     | Double                                 | Yes                  | 202             | 203  |
| Richter 2000 B                      | 10 mg   | w105 | Gastro-oesophageal reflux                         | Parallel  | Unspecified method     | Double                                 | Yes                  | 118             | 123  |
| Venables 1997 B                     | 10 mg   | w106 | Gastro-oesophageal reflux                         | Parallel  | Unspecified method     | Double                                 | Yes                  | 242             | 253  |
| Laursen 1995 X2                     | 10 mg   | w107 | Gastro-oesophageal reflux                         | Extension | Onsite computer        | Double                                 | Yes                  | 64              | 29   |
| Lind 1997                           | 10 mg   | w108 | Gastro-oesophageal reflux                         | Parallel  | Other method           | Double                                 | Yes                  | 199             | 105  |
| Uemura 2008                         | 10 mg   | w109 | Gastro-oesophageal reflux                         | Parallel  | Unspecified method     | Double                                 | Yes                  | 96              | 95   |
| OPPULENT                            | 20 mg   | w110 | Antiplatelet therapy                              | Parallel  | Unspecified method     | Double                                 | Yes                  | 83              | 86   |
| Ekström 1996                        | 20 mg   | w111 | Arthritis, rheumatic or musculoskeletal disorders | Parallel  | Unspecified method     | Double                                 | Yes                  | 86              | 91   |
| Bianchi Porro 1998                  | 20 mg   | w112 | Osteoarthritis                                    | Parallel  | Unspecified method     | Double                                 | Yes                  | 57              | 57   |



**Webtable 1 (cont.): Details of trials involving a randomized comparison of a proton pump inhibitor (X) versus control (Y)**

| Trial name                      | Regimen | Ref. | Indication for treatment                         | Design    | Allocation Concealment | Blinding of investigators and patients | Availability of data | No. of patients |      |
|---------------------------------|---------|------|--------------------------------------------------|-----------|------------------------|----------------------------------------|----------------------|-----------------|------|
|                                 |         |      |                                                  |           |                        |                                        |                      | NX              | NY   |
| OMNIUM 1998 X2                  | 20 mg   | w113 | Recently healed ulcers                           | Extension | Unspecified method     | Double                                 | Yes                  | 274             | 155  |
| Brun 2000                       | 20 mg   | w114 | Gastro-oesophageal reflux                        | Parallel  | Unspecified method     | Double                                 | No                   | -               | -    |
| Sgouros 2005                    | 20 mg   | w115 | Schatzki's rings                                 | Parallel  | Sealed envelopes       | Unknown                                | No                   | 15              | 15   |
| Meineche-Schmidt 2004           | 20 mg   | w116 | Gastro-oesophageal reflux                        | Parallel  | Closed list            | Double                                 | No                   | 273             | 272  |
| Veldhuyzen van Zanten 1998      | 20 mg   | w117 | Gastritis or duodenitis                          | Parallel  | Unspecified method     | Double                                 | No                   | 45              | 47   |
| Farup 1999                      | 20 mg   | w97  | Gastro-oesophageal reflux                        | Parallel  | Unspecified method     | Double                                 | No                   | 8               | 10   |
| COGENT                          | 20 mg   | w118 | Dual antiplatelet therapy                        | Parallel  | Other method           | Double                                 | Yes                  | 1938            | 1935 |
| Talley 1998 A                   | 20 mg   | w99  | Gastro-oesophageal reflux                        | Parallel  | Closed list            | Double                                 | No                   | 427             | 426  |
| Ishizaki 1995                   | 20 mg   | w119 | Healthy volunteers                               | Crossover | Unspecified method     | Single                                 | Yes                  | 5               | 5    |
| Marzio 1995 X2                  | 20 mg   | w120 | Recently healed ulcers                           | Extension | Unspecified method     | Unknown                                | Yes                  | 36              | 25   |
| Castell 1996                    | 20 mg   | w60  | Gastro-oesophageal reflux                        | Parallel  | Unspecified method     | Double                                 | Yes                  | 431             | 213  |
| Brummer 1997                    | 20 mg   | w71  | Healthy volunteers                               | Crossover | Unspecified method     | Double                                 | No                   | 5               | 5    |
| Carlsson 1998 (no oesophagitis) | 20 mg   | w101 | Gastro-oesophageal reflux                        | Parallel  | Unspecified method     | Double                                 | No                   | 87              | 88   |
| Hetzel 1988 B                   | 20 mg   | w121 | Gastro-oesophageal reflux                        | Parallel  | Unspecified method     | Double                                 | No                   | 82              | 32   |
| Goh 1995                        | 20 mg   | w122 | Recently healed ulcers                           | Parallel  | Closed list            | Double                                 | Yes                  | 60              | 63   |
| Bate 1995                       | 20 mg   | w102 | Gastro-oesophageal reflux                        | Parallel  | Unspecified method     | Double                                 | Yes                  | 69              | 63   |
| Ford 1994                       | 20 mg   | w123 | Asthma                                           | Crossover | Unspecified method     | Double                                 | No                   | 6               | 6    |
| Allgood 2005                    | 20 mg   | w103 | Gastro-oesophageal reflux                        | Parallel  | Unspecified method     | Double                                 | Yes                  | 1047            | 1053 |
| Blohme 1993                     | 20 mg   | w124 | Renal transplant                                 | Crossover | Unspecified method     | Double                                 | No                   | 5               | 5    |
| Blum 2000                       | 20 mg   | w104 | Gastro-oesophageal reflux                        | Parallel  | Unspecified method     | Double                                 | Yes                  | 193             | 203  |
| Guslandi 1992                   | 20 mg   | w125 | Gastro-oesophageal reflux                        | Parallel  | Unspecified method     | Double                                 | No                   | 12              | 12   |
| Garg 1995                       | 20 mg   | w126 | Varices                                          | Parallel  | Unspecified method     | Double                                 | No                   | 23              | 24   |
| Gerson 2005                     | 20 mg   | w127 | Gastro-oesophageal reflux                        | Parallel  | Pharmacy               | Double                                 | Yes                  | 21              | 19   |
| Hatlebakk 1999                  | 20 mg   | w128 | Gastro-oesophageal reflux                        | Parallel  | Pharmacy               | Double                                 | No                   | 161             | 159  |
| Sutfin 1989                     | 20 mg   | w129 | Healthy volunteers                               | Crossover | Unspecified method     | Double                                 | Yes                  | 10              | 10   |
| Unge 1992                       | 20 mg   | w130 | Anticoagulation                                  | Crossover | Unspecified method     | Double                                 | Yes                  | 13              | 15   |
| Sartori 2000                    | 20 mg   | w131 | Cancer or palliative care (non gastrointestinal) | Parallel  | Unspecified method     | Unknown                                | Yes                  | 76              | 75   |
| Sontag 1992                     | 20 mg   | w132 | Gastro-oesophageal reflux                        | Parallel  | Unspecified method     | Double                                 | No                   | 93              | 46   |
| Richter 2000 B                  | 20 mg   | w105 | Gastro-oesophageal reflux                        | Parallel  | Unspecified method     | Double                                 | Yes                  | 118             | 123  |
| Simon 1995 A                    | 20 mg   | w133 | Healthy volunteers                               | Parallel  | Unspecified method     | Double                                 | No                   | 12              | 12   |
| Sontag 1997 A                   | 20 mg   | w134 | Gastro-oesophageal reflux                        | Parallel  | Unspecified method     | Double                                 | No                   | 138             | 131  |
| Howard 1994                     | 20 mg   | w135 | Gastro-oesophageal reflux                        | Parallel  | Unspecified method     | Double                                 | No                   | 18              | 17   |
| Rokkas 2001                     | 20 mg   | w136 | Gastro-oesophageal reflux                        | Parallel  | Onsite computer        | Open                                   | Yes                  | 40              | 40   |
| Laursen 1995 X2                 | 20 mg   | w107 | Gastro-oesophageal reflux                        | Extension | Onsite computer        | Double                                 | Yes                  | 65              | 29   |
| Bate 1996                       | 20 mg   | w137 | Gastro-oesophageal reflux                        | Parallel  | Unspecified method     | Double                                 | Yes                  | 98              | 111  |
| Heijerman 1993                  | 20 mg   | w138 | Cystic fibrosis                                  | Crossover | Unspecified method     | Double                                 | Yes                  | 6               | 6    |
| Lind 1997                       | 20 mg   | w108 | Gastro-oesophageal reflux                        | Parallel  | Other method           | Double                                 | Yes                  | 205             | 105  |
| Levin 1998                      | 20 mg   | w139 | Asthma                                           | Crossover | Other method           | Double                                 | No                   | 5               | 4    |
| Uemura 2008                     | 20 mg   | w109 | Gastro-oesophageal reflux                        | Parallel  | Unspecified method     | Double                                 | Yes                  | 93              | 95   |
| Meineche-Schmidt 1997 (healthy) | 20 mg   | w140 | Healthy volunteers                               | Parallel  | Closed list            | Double                                 | No                   | 278             | 270  |
| Houben 1995                     | 20 mg   | w141 | Healthy volunteers                               | Crossover | Unspecified method     | Double                                 | No                   | 3               | 3    |
| Ostovaneh 2014                  | 20 mg   | w142 | Gastro-oesophageal reflux                        | Parallel  | Closed list            | Double                                 | No                   | 48              | 48   |
| Aimi 2014                       | 20 mg   | w143 | Insomnia                                         | Parallel  | Pharmacy               | Double                                 | No                   | 89              | 86   |
| Stephenson 2015                 | 20 mg   | w144 | Laryngeal cancer                                 | Parallel  | Onsite computer        | Double                                 | No                   | 21              | 19   |
| Ren 2011                        | 20 mg   | w145 | Percutaneous coronary intervention               | Parallel  | Unspecified method     | Unknown                                | Yes                  | 86              | 86   |
| Dammann 1985 C                  | 30 mg   | w146 | Healthy volunteers                               | Parallel  | Unspecified method     | Double                                 | Yes                  | 10              | 5    |
| Hetzel 1988 A                   | 30 mg   | w121 | Gastro-oesophageal reflux                        | Parallel  | Unspecified method     | Double                                 | Yes                  | 32              | 32   |
| Maev 2002                       | 40 mg   | w147 | Asthma                                           | Parallel  | Unspecified method     | Unknown                                | No                   | 64              | 53   |
| Bolling-Sternevald 2002         | 40 mg   | w148 | Gastro-oesophageal reflux                        | Parallel  | Closed list            | Double                                 | Yes                  | 100             | 97   |
| Laine 1998 C                    | 40 mg   | w149 | Recently healed ulcers                           | Parallel  | Unspecified method     | Double                                 | No                   | 48              | 50   |
| Meineche-Schmidt 2004           | 40 mg   | w116 | Gastro-oesophageal reflux                        | Parallel  | Closed list            | Double                                 | No                   | 283             | 272  |

**Webtable 1 (cont.): Details of trials involving a randomized comparison of a proton pump inhibitor (X) versus control (Y)**

| Trial name                            | Regimen | Ref. | Indication for treatment                          | Design    | Allocation Concealment | Blinding of investigators and patients | Availability of data | No. of patients |     |
|---------------------------------------|---------|------|---------------------------------------------------|-----------|------------------------|----------------------------------------|----------------------|-----------------|-----|
|                                       |         |      |                                                   |           |                        |                                        |                      | NX              | NY  |
| Rabeneck 2002                         | 40 mg   | w150 | Gastro-oesophageal reflux                         | Parallel  | Onsite computer        | Double                                 | Yes                  | 71              | 69  |
| Kiljander 1999                        | 40 mg   | w151 | Asthma                                            | Crossover | Unspecified method     | Double                                 | No                   | 27              | 25  |
| Scheiman 1994                         | 40 mg   | w152 | Healthy volunteers                                | Crossover | Unspecified method     | Double                                 | No                   | 11              | 9   |
| Achem 1997                            | 40 mg   | w153 | Gastro-oesophageal reflux                         | Parallel  | Onsite computer        | Double                                 | No                   | 17              | 19  |
| Caraco 1995                           | 40 mg   | w154 | Healthy volunteers                                | Crossover | Unspecified method     | Double                                 | No                   | 8               | 8   |
| Hetzel 1988 B                         | 40 mg   | w121 | Gastro-oesophageal reflux                         | Parallel  | Unspecified method     | Double                                 | No                   | 82              | 32  |
| Bortolotti 2006                       | 40 mg   | w155 | Gastro-oesophageal reflux                         | Parallel  | Unspecified method     | Double                                 | No                   | 10              | 10  |
| Dorta 2000                            | 40 mg   | w156 | Healthy volunteers                                | Crossover | Sealed envelopes       | Double                                 | Yes                  | 6               | 6   |
| Kiljander 2000                        | 40 mg   | w157 | Gastro-oesophageal reflux                         | Crossover | Unspecified method     | Double                                 | No                   | 14              | 14  |
| Fallahi 2008                          | 40 mg   | w158 | Gastro-oesophageal reflux                         | Parallel  | Unspecified method     | Double                                 | No                   | 18              | 18  |
| Meier 1994                            | 40 mg   | w159 | Asthma                                            | Crossover | Unspecified method     | Double                                 | Yes                  | 10              | 5   |
| Sharma 1987                           | 40 mg   | w160 | Healthy volunteers                                | Parallel  | Unspecified method     | Unknown                                | Yes                  | 8               | 8   |
| Teichtahl 1996                        | 40 mg   | w161 | Gastro-oesophageal reflux                         | Crossover | Unspecified method     | Double                                 | No                   | 12              | 12  |
| Sontag 1992                           | 40 mg   | w132 | Gastro-oesophageal reflux                         | Parallel  | Unspecified method     | Double                                 | No                   | 91              | 46  |
| Rabeneck 2001                         | 40 mg   | w162 | Gastro-oesophageal reflux                         | Parallel  | Unspecified method     | Double                                 | No                   | -               | -   |
| Simon 1995 A                          | 40 mg   | w133 | Healthy volunteers                                | Parallel  | Unspecified method     | Double                                 | No                   | 12              | 12  |
| Unge 1989 B                           | 40 mg   | w163 | Gastritis or duodenitis                           | Parallel  | Unspecified method     | Double                                 | No                   | 10              | 7   |
| Watson 1997                           | 40 mg   | w164 | Oesophageal disorders                             | Crossover | Unspecified method     | Double                                 | Yes                  | 10              | 10  |
| Serfaty-Lacrosniere 1995              | 40 mg   | w165 | Healthy volunteers                                | Parallel  | Unspecified method     | Unknown                                | No                   | 8               | 5   |
| Budzynski 2008                        | 40 mg   | w166 | Cardiovascular disease                            | Crossover | Pharmacy               | Double                                 | No                   | 24              | 24  |
| Houben 1995                           | 40 mg   | w141 | Healthy volunteers                                | Crossover | Unspecified method     | Double                                 | No                   | 3               | 3   |
| Chen 2013                             | 40 mg   | w167 | Gastro-oesophageal reflux                         | Parallel  | Unspecified method     | Unknown                                | Yes                  | 30              | 30  |
| Emami 2014                            | 40 mg   | w168 | Chronic cough                                     | Crossover | Unspecified method     | Double                                 | No                   | 23              | 22  |
| Poh 2011                              | 40 mg   | w169 | Gastro-oesophageal reflux                         | Parallel  | Unspecified method     | Unknown                                | No                   | 31              | 16  |
| Study 301                             | 40 mg   | w170 | Cardiovascular disease                            | Parallel  | Unspecified method     | Double                                 | Yes                  | 265             | 265 |
| Study 302                             | 40 mg   | w170 | Cardiovascular disease                            | Parallel  | Unspecified method     | Double                                 | Yes                  | 259             | 260 |
| Goldstein 2013                        | 40 mg   | w171 | Antiplatelet therapy                              | Parallel  | Unspecified method     | Double                                 | Yes                  | 521             | 522 |
| Cai 2010                              | 40 mg   | w172 | Percutaneous coronary intervention                | Parallel  | Unspecified method     | Unknown                                | Yes                  | 20              | 20  |
| Boeree 1998                           | 80 mg   | w173 | Gastro-oesophageal reflux                         | Parallel  | Unspecified method     | Double                                 | No                   | 18              | 18  |
| Noordzij 2001                         | 80 mg   | w174 | Gastro-oesophageal reflux                         | Parallel  | Unspecified method     | Double                                 | Yes                  | 15              | 15  |
| Pandak 2002                           | 80 mg   | w175 | Gastro-oesophageal reflux                         | Crossover | Unspecified method     | Double                                 | Yes                  | 22              | 20  |
| Ours 1999                             | 80 mg   | w176 | Chronic cough                                     | Parallel  | Unspecified method     | Double                                 | Yes                  | 8               | 9   |
| Freedberg 2015                        | 80 mg   | w177 | Healthy volunteers                                | Crossover | Unspecified method     | Unknown                                | No                   | 6               | 6   |
| Andersson 2014                        | 80 mg   | w41  | Healthy volunteers                                | Crossover | Onsite computer        | Unknown                                | Yes                  | 27              | 27  |
| Dabirmoghadam 2012                    | Unknown | w178 | Gastro-oesophageal reflux                         | Parallel  | Unspecified method     | Unknown                                | No                   | 30              | 30  |
| <b><i>Pantoprazole vs Control</i></b> |         |      |                                                   |           |                        |                                        |                      |                 |     |
| Richter 2000 A                        | 10 mg   | w179 | Gastro-oesophageal reflux                         | Parallel  | Unspecified method     | Double                                 | No                   | 174             | 82  |
| Pilotto 2003                          | 20 mg   | w180 | Gastro-oesophageal reflux                         | Parallel  | Unspecified method     | Double                                 | No                   | 49              | 56  |
| Richter 2000 A                        | 20 mg   | w179 | Gastro-oesophageal reflux                         | Parallel  | Unspecified method     | Double                                 | No                   | 174             | 82  |
| van Rensburg 2008                     | 20 mg   | w181 | Gastro-oesophageal reflux                         | Parallel  | Unspecified method     | Double                                 | Yes                  | 207             | 212 |
| Holtmann 2011                         | 20 mg   | w182 | Antiplatelet therapy                              | Parallel  | Unspecified method     | Double                                 | Yes                  | 404             | 396 |
| van der Velden 2010                   | 20 mg   | w183 | Gastro-oesophageal reflux                         | Parallel  | Closed list            | Double                                 | No                   | 62              | 141 |
| Bianchi Porro 2000                    | 40 mg   | w184 | Arthritis, rheumatic or musculoskeletal disorders | Parallel  | Other method           | Double                                 | Yes                  | 70              | 34  |
| Richter 2000 A                        | 40 mg   | w179 | Gastro-oesophageal reflux                         | Parallel  | Unspecified method     | Double                                 | No                   | 173             | 82  |
| Dammann 1994                          | 40 mg   | w185 | Healthy volunteers                                | Crossover | Unspecified method     | Double                                 | No                   | 6               | 8   |
| Santos 2006                           | 40 mg   | w186 | Asthma                                            | Parallel  | Unspecified method     | Double                                 | No                   | 22              | 22  |
| Dabos 2010                            | 40 mg   | w187 | Gastritis or duodenitis                           | Parallel  | Unspecified method     | Unknown                                | No                   | 13              | 13  |
| Wo 2006                               | 40 mg   | w188 | Gastro-oesophageal reflux                         | Parallel  | Closed list            | Double                                 | Yes                  | 20              | 19  |
| Schwartz 2001                         | 40 mg   | w189 | Gastro-oesophageal reflux                         | Parallel  | Unspecified method     | Double                                 | No                   | 10              | 10  |
| Müller 1998                           | 40 mg   | w190 | Healthy volunteers                                | Parallel  | Unspecified method     | Double                                 | Yes                  | 16              | 8   |
| Suurna 2008                           | 40 mg   | w191 | Gastro-oesophageal reflux                         | Crossover | Sealed envelopes       | Double                                 | No                   | 30              | 30  |

**Webtable 1 (cont.): Details of trials involving a randomized comparison of a proton pump inhibitor (X) versus control (Y)**

| Trial name                             | Regimen | Ref. | Indication for treatment                          | Design    | Allocation Concealment | Blinding of investigators and patients | Availability of data | No. of patients |     |
|----------------------------------------|---------|------|---------------------------------------------------|-----------|------------------------|----------------------------------------|----------------------|-----------------|-----|
|                                        |         |      |                                                   |           |                        |                                        |                      | NX              | NY  |
| Cervelli 2012                          | 40 mg   | w192 | Haemodialysis                                     | Crossover | Unspecified method     | Double                                 | No                   | 13              | 13  |
| Niklasson 2010                         | 40 mg   | w193 | Healthy volunteers                                | Parallel  | Closed list            | Double                                 | No                   | 25              | 25  |
| Baysal 2015                            | 40 mg   | w194 | Gastro-oesophageal reflux                         | Parallel  | Onsite computer        | Double                                 | Yes                  | 132             | 132 |
| Yu 2013 A                              | 40 mg   | w14  | Cardiovascular disease                            | Parallel  | Unspecified method     | Unknown                                | No                   | 100             | 148 |
| Gonzalez-Ortiz 2015                    | 40 mg   | w195 | Diabetes                                          | Parallel  | Unspecified method     | Double                                 | No                   | 7               | 7   |
| Lai 2012                               | 40 mg   | w196 | Haemodialysis                                     | Crossover | Unspecified method     | Double                                 | Yes                  | 5               | 5   |
| Yu 2013 B                              | 40 mg   | w197 | Dual antiplatelet therapy                         | Parallel  | Unspecified method     | Unknown                                | No                   | 35              | 35  |
| Yang 2014                              | 40 mg   | w198 | Gastro-oesophageal reflux                         | Parallel  | Unspecified method     | Unknown                                | Yes                  | 75              | 74  |
| Cai 2010                               | 40 mg   | w172 | Percutaneous coronary intervention                | Parallel  | Unspecified method     | Unknown                                | Yes                  | 20              | 20  |
| Zhao 2015                              | 75 mg   | w199 | Percutaneous coronary intervention                | Parallel  | Unspecified method     | Unknown                                | Yes                  | 150             | 150 |
| Eherer 2003                            | 80 mg   | w200 | Gastro-oesophageal reflux                         | Crossover | Unspecified method     | Double                                 | Yes                  | 10              | 10  |
| Singh 2012                             | 80 mg   | w201 | Diabetes                                          | Parallel  | Closed list            | Double                                 | Yes                  | 16              | 15  |
| <b><i>Rabeprazole vs Control</i></b>   |         |      |                                                   |           |                        |                                        |                      |                 |     |
| Japan Rabeprazole Study Group for NERD | 5 mg    | w202 | Gastro-oesophageal reflux                         | Parallel  | Unspecified method     | Double                                 | Yes                  | 93              | 93  |
| Caos 2005                              | 10 mg   | w203 | Gastro-oesophageal reflux                         | Parallel  | Onsite computer        | Double                                 | No                   | 165             | 169 |
| Caos 2000                              | 10 mg   | w204 | Gastro-oesophageal reflux                         | Parallel  | Unspecified method     | Double                                 | Yes                  | 70              | 70  |
| Cloud 1998 C                           | 10 mg   | w205 | Gastro-oesophageal reflux                         | Parallel  | Unspecified method     | Double                                 | No                   | 27              | 25  |
| Birbara 2000                           | 10 mg   | w206 | Gastro-oesophageal reflux                         | Parallel  | Unspecified method     | Double                                 | No                   | 95              | 99  |
| Miner 2006 B                           | 10 mg   | w207 | Gastro-oesophageal reflux                         | Parallel  | Unspecified method     | Double                                 | Yes                  | 65              | 70  |
| CAESAR                                 | 10 mg   | w208 | Gastro-oesophageal reflux                         | Parallel  | Unspecified method     | Double                                 | No                   | 49              | 49  |
| Tanaka 2014                            | 10 mg   | w209 | Osteoporosis                                      | Parallel  | Unspecified method     | Unknown                                | No                   | 49              | 47  |
| Munesue 2012                           | 10 mg   | w210 | Gastro-oesophageal reflux                         | Parallel  | Unspecified method     | Double                                 | No                   | -               | -   |
| Hidaka 2012                            | 10 mg   | w211 | Varices                                           | Parallel  | Onsite computer        | Open                                   | Yes                  | 21              | 22  |
| Itoh 2013                              | 10 mg   | w212 | Osteoporosis                                      | Parallel  | Unspecified method     | Unknown                                | Yes                  | 94              | 86  |
| SAMURAI                                | 10 mg   | w213 | Gastro-oesophageal reflux                         | Parallel  | Unspecified method     | Double                                 | Yes                  | 84              | 85  |
| Japan Rabeprazole Study Group for NERD | 10 mg   | w202 | Gastro-oesophageal reflux                         | Parallel  | Unspecified method     | Double                                 | Yes                  | 102             | 93  |
| Chen H 2010                            | 20 mg   | w214 | Cholecystectomy                                   | Parallel  | Sealed envelopes       | Unknown                                | No                   | 61              | 59  |
| Caos 2005                              | 20 mg   | w203 | Gastro-oesophageal reflux                         | Parallel  | Onsite computer        | Double                                 | No                   | 163             | 169 |
| Caos 2000                              | 20 mg   | w204 | Gastro-oesophageal reflux                         | Parallel  | Unspecified method     | Double                                 | Yes                  | 69              | 70  |
| Dammann 1999                           | 20 mg   | w215 | Healthy volunteers                                | Crossover | Unspecified method     | Double                                 | Yes                  | 6               | 6   |
| Cloud 1998 C                           | 20 mg   | w205 | Gastro-oesophageal reflux                         | Parallel  | Unspecified method     | Double                                 | No                   | 25              | 25  |
| Birbara 2000                           | 20 mg   | w206 | Gastro-oesophageal reflux                         | Parallel  | Unspecified method     | Double                                 | No                   | 94              | 99  |
| Laheij 2003                            | 20 mg   | w216 | Antiplatelet therapy                              | Parallel  | Closed list            | Double                                 | Yes                  | 76              | 74  |
| Miner 2006 B                           | 20 mg   | w207 | Gastro-oesophageal reflux                         | Parallel  | Unspecified method     | Double                                 | Yes                  | 68              | 70  |
| van Rossum 2004                        | 20 mg   | w217 | Antiplatelet therapy                              | Parallel  | Closed list            | Double                                 | No                   | 73              | 69  |
| Santarelli 2003                        | 20 mg   | w218 | Gastro-oesophageal reflux                         | Parallel  | Closed list            | Open                                   | No                   | 20              | 20  |
| Johanson 2001                          | 20 mg   | w219 | Gastro-oesophageal reflux                         | Parallel  | Unspecified method     | Double                                 | No                   | 59              | 58  |
| Chan 2014 A                            | 20 mg   | w220 | Arthritis, rheumatic or musculoskeletal disorders | Parallel  | Closed list            | Double                                 | No                   | 58              | 55  |
| Munesue 2012                           | 20 mg   | w210 | Gastro-oesophageal reflux                         | Parallel  | Unspecified method     | Double                                 | No                   | -               | -   |
| SAMURAI                                | 20 mg   | w213 | Gastro-oesophageal reflux                         | Parallel  | Unspecified method     | Double                                 | Yes                  | 85              | 85  |
| Katare 2013                            | 20 mg   | w221 | Gastritis or duodenitis                           | Parallel  | Unspecified method     | Unknown                                | No                   | 30              | 30  |
| Sun 2014                               | 20 mg   | w222 | Gastro-oesophageal reflux                         | Parallel  | Unspecified method     | Unknown                                | No                   | 30              | 30  |
| Peterson 2008                          | 30 mg   | w223 | Asthma                                            | Parallel  | Onsite computer        | Double                                 | No                   | 23              | 8   |
| Pawar 2007                             | 40 mg   | w224 | Post nasal drip                                   | Parallel  | Unspecified method     | Double                                 | No                   | 21              | 26  |
| Cloud 1998 C                           | 40 mg   | w205 | Gastro-oesophageal reflux                         | Parallel  | Unspecified method     | Double                                 | No                   | 26              | 25  |
| Steward 2004                           | 40 mg   | w225 | Gastro-oesophageal reflux                         | Parallel  | Sealed envelopes       | Double                                 | Yes                  | 21              | 21  |
| Lam 2010                               | 40 mg   | w226 | Gastro-oesophageal reflux                         | Parallel  | Closed list            | Double                                 | No                   | 43              | 43  |
| Leelayuthachai 2012                    | 40 mg   | w227 | Gastro-oesophageal reflux                         | Parallel  | Unspecified method     | Unknown                                | No                   | -               | -   |
| Munesue 2012                           | 40 mg   | w210 | Gastro-oesophageal reflux                         | Parallel  | Unspecified method     | Double                                 | No                   | -               | -   |
| SAMURAI                                | 40 mg   | w213 | Gastro-oesophageal reflux                         | Parallel  | Unspecified method     | Double                                 | Yes                  | 84              | 85  |

**Webtable 1 (cont.): Details of trials involving a randomized comparison of a proton pump inhibitor (X) versus control (Y)**

| Trial name                                 | Regimen  | Ref. | Indication for treatment  | Design   | Allocation Concealment | Blinding of investigators and patients | Availability of data | No. of patients |     |
|--------------------------------------------|----------|------|---------------------------|----------|------------------------|----------------------------------------|----------------------|-----------------|-----|
|                                            |          |      |                           |          |                        |                                        |                      | NX              | NY  |
| <b>Other PPI vs Control</b>                |          |      |                           |          |                        |                                        |                      |                 |     |
| Johansson 2009                             | 40-60 mg | w228 | Oesophagectomy            | Parallel | Sealed envelopes       | Open                                   | Yes                  | 40              | 40  |
| Holtmann 2013 (without herbal preparation) | Unknown  | w229 | Gastro-oesophageal reflux | Parallel | Unspecified method     | Double                                 | No                   | 30              | 25  |
| Holtmann 2013 (with herbal preparation)    | Unknown  | w229 | Gastro-oesophageal reflux | Parallel | Unspecified method     | Double                                 | No                   | 28              | 27  |
| <b>Healing Trials</b>                      |          |      |                           |          |                        |                                        |                      |                 |     |
| <b>Esomeprazole vs Control</b>             |          |      |                           |          |                        |                                        |                      |                 |     |
| Tulassay 2008                              | 20 mg    | w230 | Peptic ulcers             | Parallel | Closed list            | Double                                 | Yes                  | 164             | 152 |
| <b>Lansoprazole vs Control</b>             |          |      |                           |          |                        |                                        |                      |                 |     |
| Avner 1995 B                               | 15 mg    | w231 | Peptic ulcers             | Parallel | Unspecified method     | Double                                 | Yes                  | 73              | 75  |
| Avner 1995 A                               | 15 mg    | w232 | Peptic ulcers             | Parallel | Unspecified method     | Double                                 | Yes                  | 64              | 60  |
| Jhala 1995                                 | 15 mg    | w233 | Peptic ulcers             | Parallel | Unspecified method     | Double                                 | Yes                  | 34              | 19  |
| Lanza 1994                                 | 15 mg    | w234 | Peptic ulcers             | Parallel | Unspecified method     | Double                                 | Yes                  | 87              | 44  |
| Avner 1995 B                               | 30 mg    | w231 | Peptic ulcers             | Parallel | Unspecified method     | Double                                 | Yes                  | 75              | 75  |
| Avner 1995 A                               | 30 mg    | w232 | Peptic ulcers             | Parallel | Unspecified method     | Double                                 | Yes                  | 62              | 60  |
| Jhala 1995                                 | 30 mg    | w233 | Peptic ulcers             | Parallel | Unspecified method     | Double                                 | Yes                  | 33              | 19  |
| Lanza 1994                                 | 30 mg    | w234 | Peptic ulcers             | Parallel | Unspecified method     | Double                                 | Yes                  | 84              | 44  |
| Fu 2012                                    | 30 mg    | w235 | Peptic ulcers             | Parallel | Unspecified method     | Unknown                                | Yes                  | 56              | 56  |
| Avner 1995 B                               | 60 mg    | w231 | Peptic ulcers             | Parallel | Unspecified method     | Double                                 | Yes                  | 73              | 75  |
| Avner 1995 A                               | 60 mg    | w232 | Peptic ulcers             | Parallel | Unspecified method     | Double                                 | Yes                  | 59              | 60  |
| Harford 1996                               | 60 mg    | w236 | Peptic ulcers             | Parallel | Unspecified method     | Double                                 | Yes                  | 68              | 67  |
| Harford 1996                               | 90 mg    | w236 | Peptic ulcers             | Parallel | Unspecified method     | Double                                 | Yes                  | 72              | 67  |
| <b>Omeprazole vs Control</b>               |          |      |                           |          |                        |                                        |                      |                 |     |
| Hsu 2003                                   | 20 mg    | w237 | Peptic ulcers             | Parallel | Unspecified method     | Open                                   | Yes                  | 40              | 39  |
| D'Imperio 1994                             | 20 mg    | w238 | Post-endoscopic ulcers    | Parallel | Unspecified method     | Open                                   | No                   | 73              | 73  |
| Jung 2008                                  | 20 mg    | w239 | Peptic ulcers             | Parallel | Unspecified method     | Open                                   | Yes                  | 14              | 12  |
| Dotto 1993                                 | 20 mg    | w240 | Peptic ulcers             | Parallel | Unspecified method     | Unknown                                | Yes                  | 12              | 10  |
| Valenzuela 1996                            | 20 mg    | w241 | Peptic ulcers             | Parallel | Unspecified method     | Double                                 | Yes                  | 202             | 104 |
| Sezer 1995 (with ciprofloxacin)            | 20 mg    | w242 | Peptic ulcers             | Parallel | Unspecified method     | Double                                 | Yes                  | 24              | 21  |
| Sezer 1995 (no ciprofloxacin)              | 20 mg    | w242 | Peptic ulcers             | Parallel | Unspecified method     | Double                                 | Yes                  | 23              | 24  |
| Graham 1990                                | 20 mg    | w243 | Peptic ulcers             | Parallel | Unspecified method     | Double                                 | Yes                  | 102             | 51  |
| Hepylog Investigator Study Group           | 20 mg    | w244 | Peptic ulcers             | Parallel | Sealed envelopes       | Double                                 | Yes                  | 76              | 74  |
| Marzio 2003                                | 20 mg    | w245 | Peptic ulcers             | Parallel | Unspecified method     | Double                                 | Yes                  | 50              | 53  |
| Tepes 2001                                 | 20 mg    | w246 | Peptic ulcers             | Parallel | Unspecified method     | Double                                 | Yes                  | 38              | 39  |
| Labenz 1997 C                              | 20 mg    | w247 | Peptic ulcers             | Parallel | Unspecified method     | Double                                 | Yes                  | 21              | 20  |
| Laine 1998 B                               | 40 mg    | w149 | Peptic ulcers             | Parallel | Unspecified method     | Double                                 | Yes                  | 62              | 59  |
| Valenzuela 1996                            | 40 mg    | w241 | Peptic ulcers             | Parallel | Unspecified method     | Double                                 | Yes                  | 214             | 104 |
| Uygurer 1998                               | 40 mg    | w248 | Peptic ulcers             | Parallel | Unspecified method     | Unknown                                | Yes                  | 25              | 25  |
| Zafar 2012                                 | 40 mg    | w249 | Peptic ulcers             | Parallel | Unspecified method     | Unknown                                | No                   | -               | -   |
| Laine 1998 A                               | 80 mg    | w149 | Peptic ulcers             | Parallel | Unspecified method     | Double                                 | Yes                  | 72              | 37  |
| Neil 1998 A                                | 80 mg    | w250 | Peptic ulcers             | Parallel | Unspecified method     | Double                                 | No                   | 36              | 13  |
| <b>Pantoprazole vs Control</b>             |          |      |                           |          |                        |                                        |                      |                 |     |
| Bago 1998                                  | 80 mg    | w251 | Peptic ulcers             | Parallel | Unspecified method     | Unknown                                | Yes                  | 44              | 50  |
| <b>Rabeprazole vs Control</b>              |          |      |                           |          |                        |                                        |                      |                 |     |
| Takeuchi 2012                              | 10 mg    | w252 | Peptic ulcers             | Parallel | Closed list            | Open                                   | Yes                  | 40              | 38  |
| Cloud 1998 A                               | 20 mg    | w253 | Peptic ulcers             | Parallel | Unspecified method     | Double                                 | Yes                  | 32              | 31  |
| Cloud 1998 B                               | 20 mg    | w253 | Peptic ulcers             | Parallel | Unspecified method     | Double                                 | Yes                  | 34              | 33  |
| Cloud 1998 A                               | 40 mg    | w253 | Peptic ulcers             | Parallel | Unspecified method     | Double                                 | Yes                  | 31              | 31  |
| Cloud 1998 B                               | 40 mg    | w253 | Peptic ulcers             | Parallel | Unspecified method     | Double                                 | Yes                  | 33              | 33  |

**Webtable 1 (cont.): Details of trials involving a randomized comparison of a proton pump inhibitor (X) versus control (Y)**

| Trial name                            | Regimen | Ref. | Indication for treatment  | Design    | Allocation Concealment | Blinding of investigators and patients | Availability of data | No. of patients |     |
|---------------------------------------|---------|------|---------------------------|-----------|------------------------|----------------------------------------|----------------------|-----------------|-----|
|                                       |         |      |                           |           |                        |                                        |                      | NX              | NY  |
| <b>Acute Bleeding Trials</b>          |         |      |                           |           |                        |                                        |                      |                 |     |
| <b><i>Esomeprazole vs Control</i></b> |         |      |                           |           |                        |                                        |                      |                 |     |
| Peptic Ulcer Bleed Study              | 192 mg  | w254 | Bleeding Peptic Ulcer     | Parallel  | Onsite computer        | Double                                 | Yes                  | 376             | 391 |
| <b><i>Lansoprazole vs Control</i></b> |         |      |                           |           |                        |                                        |                      |                 |     |
| Hawkey 2001                           | 120 mg  | w255 | UGI bleeding of any cause | Factorial | Unspecified method     | Double                                 | Yes                  | 102             | 103 |
| <b><i>Omeprazole vs Control</i></b>   |         |      |                           |           |                        |                                        |                      |                 |     |
| Khuroo 1997                           | 80 mg   | w256 | Bleeding Peptic Ulcer     | Parallel  | Sealed envelopes       | Double                                 | Yes                  | 110             | 110 |
| Javid 2001                            | 80 mg   | w257 | Bleeding Peptic Ulcer     | Parallel  | Sealed envelopes       | Double                                 | Yes                  | 82              | 84  |
| Sofia 2000                            | 120 mg  | w258 | Bleeding Peptic Ulcer     | Parallel  | Other method           | Open                                   | Yes                  | 40              | 44  |
| Lau 2000                              | 192 mg  | w259 | Bleeding Peptic Ulcer     | Parallel  | Pharmacy               | Single                                 | Yes                  | 120             | 120 |
| Hasselgren 1997                       | 192 mg  | w260 | Bleeding Peptic Ulcer     | Parallel  | Unspecified method     | Double                                 | Yes                  | 159             | 163 |
| Lau 2007                              | 192 mg  | w261 | UGI bleeding of any cause | Parallel  | Pharmacy               | Double                                 | Yes                  | 319             | 319 |
| Schaffalitzky de Muckadell 1997       | 192 mg  | w262 | Bleeding Peptic Ulcer     | Parallel  | Onsite computer        | Double                                 | Yes                  | 134             | 140 |
| Daneshmend 1992                       | 200 mg  | w263 | UGI bleeding of any cause | Parallel  | Unspecified method     | Double                                 | Yes                  | 578             | 569 |
| <b><i>Pantoprazole vs Control</i></b> |         |      |                           |           |                        |                                        |                      |                 |     |
| Zargar 2006                           | 192 mg  | w264 | Bleeding Peptic Ulcer     | Parallel  | Sealed envelopes       | Double                                 | Yes                  | 102             | 101 |
| Hung 2007                             | 192 mg  | w265 | Bleeding Peptic Ulcer     | Parallel  | Closed list            | Open                                   | Yes                  | 56              | 54  |
| Hung 2007                             | 197 mg  | w265 | Bleeding Peptic Ulcer     | Parallel  | Closed list            | Open                                   | Yes                  | 56              | 54  |

Design: Parallel=parallel trial. Factorial=Factorial trial. 'Extension' studies are studies in which patients are randomised more than once during the trial (only the parts of the trial that involve a valid randomised comparison for this meta-analysis, labelled X1, X2 etc., are shown in this table). Data shown for crossover trials reflect only events during the first phase of the trial. The suffixes A, B, C, D are used to distinguish different trials published by the same author in the same year.

Allocation concealment: IVRS (Interactive Voice Response System); Telephone (telephone central office); Pharmacy (pharmacy coded containers administered sequentially); Onsite computer (onsite computer accessible only after entering patient details); Sealed envelopes (sequentially numbered, opaque or without further specification); Closed list (closed list of random numbers); Other (other specified method); Unspecified (stated as being 'randomised' but with no other details).

Blinding of investigators and patients: Single=single-blind; Double=double-blind; Open=open label.

Availability of data: Data available for at least one endpoint of interest in the meta-analyses.

In cases where the number randomised was not reported, the number evaluated was used instead. In addition, for crossover trials, where neither the number randomised nor the number evaluated was reported, the total number of participants divided by number of arms was used.

**Webtable 2: Details of trials involving a randomised comparison of a prostaglandin analogue (X) versus control (Y)**

| Trial name                    | Regimen | Ref. | Indication for treatment                          | Design    | Allocation Concealment | Blinding of investigators and patients | Availability of data | No. of patients |     |
|-------------------------------|---------|------|---------------------------------------------------|-----------|------------------------|----------------------------------------|----------------------|-----------------|-----|
|                               |         |      |                                                   |           |                        |                                        |                      | NX              | NY  |
| <b>Prevention Trials</b>      |         |      |                                                   |           |                        |                                        |                      |                 |     |
| <i>Arbaprostil vs Control</i> |         |      |                                                   |           |                        |                                        |                      |                 |     |
| Reele 1982                    | 400 ug  | w266 | Healthy volunteers                                | Parallel  | Unspecified method     | Double                                 | No                   | 6               | 6   |
| <i>Enprostil vs Control</i>   |         |      |                                                   |           |                        |                                        |                      |                 |     |
| Lanza 1990                    | 70 ug   | w267 | Healthy volunteers                                | Parallel  | Closed list            | Double                                 | Yes                  | 33              | 34  |
| Davis 1989                    | 105 ug  | w268 | Diabetes                                          | Crossover | Unspecified method     | Double                                 | No                   | 6               | 6   |
| Lanza 1990                    | 140 ug  | w267 | Healthy volunteers                                | Parallel  | Closed list            | Double                                 | Yes                  | 36              | 34  |
| <i>Misoprostol vs Control</i> |         |      |                                                   |           |                        |                                        |                      |                 |     |
| Santillan 1999                | 50 ug   | w269 | Antiplatelet therapy                              | Parallel  | Unspecified method     | Double                                 | Yes                  | 19              | 19  |
| Donnelly 2000                 | 100 ug  | w270 | Antiplatelet therapy                              | Parallel  | Unspecified method     | Double                                 | Yes                  | 16              | 16  |
| Delmas 1994                   | 400 ug  | w271 | Arthritis, rheumatic or musculoskeletal disorders | Parallel  | Unspecified method     | Double                                 | Yes                  | 73              | 103 |
| Graham 1988                   | 400 ug  | w272 | Osteoarthritis                                    | Parallel  | Unspecified method     | Double                                 | Yes                  | 143             | 138 |
| Spaggiari 1993                | 400 ug  | w273 | Post-operative                                    | Parallel  | Unspecified method     | Open                                   | No                   | 50              | 45  |
| OMNIUM 1998 X2                | 400 ug  | w113 | Recently healed ulcers                            | Extension | Unspecified method     | Double                                 | Yes                  | 296             | 155 |
| Bocanegra 1998                | 400 ug  | w274 | Osteoarthritis                                    | Parallel  | Unspecified method     | Double                                 | Yes                  | 175             | 154 |
| Van Beusekom 1995             | 400 ug  | w275 | Rheumatoid arthritis                              | Parallel  | Unspecified method     | Double                                 | No                   | 38              | 38  |
| Munger 2008                   | 400 ug  | w276 | Hypertension                                      | Crossover | Unspecified method     | Double                                 | Yes                  | 10              | 10  |
| Ahmed 1991 B                  | 400 ug  | w277 | Antiplatelet therapy                              | Parallel  | Unspecified method     | Double                                 | No                   | 18              | 19  |
| Goldin 1991                   | 400 ug  | w278 | Recently healed ulcers                            | Parallel  | Closed list            | Double                                 | Yes                  | 25              | 12  |
| Bach 1991                     | 400 ug  | w279 | Arthritis, rheumatic or musculoskeletal disorders | Parallel  | Unspecified method     | Double                                 | Yes                  | 68              | 70  |
| Curtis 1993                   | 400 ug  | w280 | Renal transplant                                  | Parallel  | Unspecified method     | Double                                 | No                   | 58              | 100 |
| Raskin 1995                   | 400 ug  | w281 | Arthritis, rheumatic or musculoskeletal disorders | Parallel  | Sealed envelopes       | Double                                 | Yes                  | 344             | 308 |
| Pazzi 1994                    | 400 ug  | w282 | Gastritis or duodenitis                           | Parallel  | Unspecified method     | Double                                 | Yes                  | 22              | 26  |
| De Melo Gomes 1992 A          | 455 ug  | w283 | Osteoarthritis                                    | Parallel  | Unspecified method     | Double                                 | Yes                  | 178             | 183 |
| Doherty 1992                  | 460 ug  | w284 | Osteoarthritis                                    | Parallel  | Unspecified method     | Double                                 | No                   | 228             | 227 |
| Agrawal 1995                  | 500 ug  | w285 | Arthritis, rheumatic or musculoskeletal disorders | Parallel  | Unspecified method     | Unknown                                | Yes                  | 193             | 191 |
| De Melo Gomes 1992 B          | 500 ug  | w283 | Rheumatoid arthritis                              | Parallel  | Unspecified method     | Double                                 | Yes                  | 164             | 175 |
| Hannequin 1992                | 500 mg  | w286 | Rheumatoid arthritis                              | Parallel  | Unspecified method     | Double                                 | No                   | 177             | 169 |
| Akkuzu 2004                   | 540 ug  | w287 | Tinnitus                                          | Parallel  | Unspecified method     | Double                                 | No                   | 28              | 14  |
| Zuinen 1993                   | 541 ug  | w288 | Arthritis, rheumatic or musculoskeletal disorders | Parallel  | Unspecified method     | Double                                 | No                   | 185             | 187 |
| Chandrasekaran 1991           | 600 ug  | w289 | Arthritis, rheumatic or musculoskeletal disorders | Parallel  | Unspecified method     | Double                                 | Yes                  | 45              | 45  |
| Henriksson 1993               | 600 ug  | w290 | Rheumatoid arthritis                              | Parallel  | Unspecified method     | Double                                 | Yes                  | 20              | 20  |
| Spaziani 1994                 | 600 mg  | w291 | Gastritis or duodenitis                           | Parallel  | Unspecified method     | Unknown                                | No                   | 16              | 14  |
| Bardhan 1993                  | 600 ug  | w292 | Arthritis, rheumatic or musculoskeletal disorders | Parallel  | Unspecified method     | Double                                 | Yes                  | 144             | 157 |
| Boers 1991                    | 600 ug  | w293 | Rheumatoid arthritis                              | Crossover | Unspecified method     | Double                                 | No                   | 12              | 12  |
| Briner 1993                   | 600 ug  | w294 | Tinnitus                                          | Parallel  | Unspecified method     | Unknown                                | Yes                  | 12              | 12  |
| Fujimori 2009                 | 600 ug  | w295 | Antiplatelet therapy                              | Parallel  | Unspecified method     | Single                                 | Yes                  | 16              | 16  |
| Kelly 1994                    | 600 ug  | w296 | Antiplatelet therapy                              | Parallel  | Unspecified method     | Double                                 | Yes                  | 5               | 10  |
| Evers 1998                    | 600 ug  | w297 | Chronic cluster headache                          | Crossover | Unspecified method     | Double                                 | Yes                  | 4               | 4   |
| Raskin 1995                   | 600 ug  | w281 | Arthritis, rheumatic or musculoskeletal disorders | Parallel  | Sealed envelopes       | Double                                 | Yes                  | 332             | 308 |
| Levi 1992                     | 600 ug  | w298 | Arthritis, rheumatic or musculoskeletal disorders | Parallel  | Unspecified method     | Unknown                                | Yes                  | 10              | 10  |
| Elliott 1994                  | 625 ug  | w299 | Arthritis, rheumatic or musculoskeletal disorders | Parallel  | Unspecified method     | Double                                 | Yes                  | 40              | 43  |
| Duenas-Gonzalez 1995          | 750 ug  | w300 | Cancer or palliative care (non gastrointestinal)  | Parallel  | Unspecified method     | Double                                 | No                   | 9               | 7   |
| Roth 1993                     | 800 ug  | w301 | Osteoarthritis                                    | Parallel  | Unspecified method     | Unknown                                | Yes                  | 60              | 53  |
| Delmas 1994                   | 800 ug  | w271 | Arthritis, rheumatic or musculoskeletal disorders | Parallel  | Unspecified method     | Double                                 | Yes                  | 80              | 103 |
| Graham 1993                   | 800 ug  | w302 | Arthritis, rheumatic or musculoskeletal disorders | Parallel  | Unspecified method     | Double                                 | Yes                  | 320             | 323 |
| Graham 2002                   | 800 ug  | w51  | Recently healed ulcers                            | Parallel  | Other method           | Double                                 | Yes                  | 134             | 134 |

**Webtable 2 (cont.): Details of trials involving a randomised comparison of a prostaglandin analogue (X) versus control (Y)**

| Trial name                     | Regimen   | Ref. | Indication for treatment                          | Design    | Allocation Concealment | Blinding of investigators and patients | Availability of data | No. of patients |      |
|--------------------------------|-----------|------|---------------------------------------------------|-----------|------------------------|----------------------------------------|----------------------|-----------------|------|
|                                |           |      |                                                   |           |                        |                                        |                      | NX              | NY   |
| Graham 1988                    | 800 ug    | w272 | Osteoarthritis                                    | Parallel  | Unspecified method     | Double                                 | Yes                  | 140             | 138  |
| MUCOSA                         | 800 ug    | w303 | Rheumatoid arthritis                              | Parallel  | Pharmacy               | Double                                 | Yes                  | 4404            | 4439 |
| Shiokawa 1991                  | 800 ug    | w304 | Rheumatoid arthritis                              | Parallel  | Unspecified method     | Double                                 | Yes                  | 133             | 130  |
| Saggioro 1991                  | 800 ug    | w305 | Arthritis, rheumatic or musculoskeletal disorders | Parallel  | Unspecified method     | Double                                 | Yes                  | 82              | 84   |
| Fullerton 1993                 | 800 ug    | w306 | Osteoarthritis                                    | Crossover | Closed list            | Double                                 | No                   | 6               | 6    |
| Bolten 1989                    | 800 ug    | w307 | Rheumatoid arthritis                              | Parallel  | Unspecified method     | Double                                 | Yes                  | 31              | 36   |
| Bennett 1991                   | 800 ug    | w308 | Healthy volunteers                                | Crossover | Unspecified method     | Double                                 | No                   | 6               | 6    |
| Hilbrands 1996                 | 800 ug    | w309 | Renal transplant                                  | Parallel  | Unspecified method     | Double                                 | Yes                  | 22              | 18   |
| Goodwin 1987                   | 800 ug    | w310 | Healthy volunteers                                | Parallel  | Unspecified method     | Double                                 | No                   | 25              | 25   |
| Curtis 1993                    | 800 ug    | w280 | Renal transplant                                  | Parallel  | Unspecified method     | Double                                 | No                   | 99              | 100  |
| Moran 1990                     | 800 ug    | w311 | Renal transplant                                  | Parallel  | Other method           | Double                                 | No                   | 38              | 39   |
| Weinblatt 1994                 | 800 ug    | w312 | Rheumatoid arthritis                              | Parallel  | Unspecified method     | Double                                 | No                   | 23              | 27   |
| Raskin 1995                    | 800 ug    | w281 | Arthritis, rheumatic or musculoskeletal disorders | Parallel  | Sealed envelopes       | Double                                 | Yes                  | 148             | 308  |
| Mavligit 1987                  | 800 ug    | w313 | Colorectal cancer                                 | Parallel  | Unspecified method     | Unknown                                | Yes                  | 11              | 10   |
| Kim 1996                       | 800 ug    | w314 | Renal transplant                                  | Parallel  | Unspecified method     | Unknown                                | No                   | 10              | 10   |
| Hausken 1990                   | 800 ug    | w315 | Gastro-oesophageal reflux                         | Parallel  | Unspecified method     | Double                                 | No                   | 68              | 69   |
| Yilmaz 2004                    | 800 ug    | w316 | Tinnitus                                          | Parallel  | Unspecified method     | Double                                 | No                   | 28              | 12   |
| Wasiak 1999                    | 1200 ug   | w317 | Asthma                                            | Crossover | Unspecified method     | Double                                 | No                   | 8               | 8    |
| <b>Rebamipide vs Control</b>   |           |      |                                                   |           |                        |                                        |                      |                 |      |
| Nishida 2011                   | 100 mg    | w318 | Healthy volunteers                                | Crossover | Closed list            | Double                                 | Yes                  | 5               | 5    |
| Han 2015                       | 300 mg    | w319 | Gastritis or duodenitis                           | Parallel  | Unspecified method     | Unknown                                | No                   | 89              | 88   |
| Mizukami 2012                  | 300 mg    | w320 | Healthy volunteers                                | Crossover | Unspecified method     | Double                                 | No                   | 6               | 6    |
| Tozawa 2014 (ASA)              | 300 mg    | w321 | Antiplatelet therapy                              | Parallel  | Unspecified method     | Double                                 | Yes                  | 8               | 8    |
| Tozawa 2014 (ASA+clopidogrel)  | 300 mg    | w321 | Dual antiplatelet therapy                         | Parallel  | Unspecified method     | Double                                 | Yes                  | 8               | 8    |
| Fujimori 2011                  | 300 mg    | w322 | Healthy volunteers                                | Parallel  | Unspecified method     | Double                                 | No                   | 34              | 38   |
| Kato 2011 A                    | 300 mg    | w323 | Healthy volunteers                                | Crossover | Unspecified method     | Double                                 | Yes                  | 5               | 5    |
| Kamada 2014                    | 300 mg    | w324 | Gastritis or duodenitis                           | Parallel  | Unspecified method     | Open                                   | No                   | 82              | 87   |
| Kurokawa 2014                  | 300 mg    | w325 | Antiplatelet therapy                              | Parallel  | Closed list            | Double                                 | Yes                  | 31              | 31   |
| Horiki 2012                    | 300 mg    | w326 | Arthritis, rheumatic or musculoskeletal disorders | Parallel  | Unspecified method     | Open                                   | Yes                  | 31              | 34   |
| Adachi 2012                    | 300 mg    | w327 | Gastro-oesophageal reflux                         | Parallel  | Onsite computer        | Double                                 | No                   | 31              | 29   |
| Abou-Raya 2013                 | 300 mg    | w328 | Osteoarthritis                                    | Parallel  | Unspecified method     | Unknown                                | No                   | 178             | 89   |
| Watanabe 2015                  | 900 mg    | w329 | Antiplatelet therapy                              | Parallel  | Unspecified method     | Double                                 | Yes                  | 29              | 14   |
| <b>Rioprostil vs Control</b>   |           |      |                                                   |           |                        |                                        |                      |                 |      |
| Paladini 1989                  | 400 ug    | w330 | Antiplatelet therapy                              | Parallel  | Unspecified method     | Double                                 | Yes                  | 11              | 9    |
| Paladini 1989                  | 450 ug    | w330 | Antiplatelet therapy                              | Parallel  | Unspecified method     | Double                                 | Yes                  | 10              | 9    |
| Purushotham 1991               | 600 ug    | w331 | Gastro-oesophageal reflux                         | Parallel  | Unspecified method     | Double                                 | Yes                  | 14              | 12   |
| <b>Healing Trials</b>          |           |      |                                                   |           |                        |                                        |                      |                 |      |
| <b>Arbaprostil vs Control</b>  |           |      |                                                   |           |                        |                                        |                      |                 |      |
| Karim 1976 B                   | 4 mg      | w332 | Peptic ulcers                                     | Parallel  | Unspecified method     | Double                                 | Yes                  | 10              | 10   |
| Gibinski 1977 (gastric ulcer)  | 4.5 ug/kg | w333 | Peptic ulcers                                     | Parallel  | Unspecified method     | Double                                 | Yes                  | 12              | 7    |
| Gibinski 1977 (duodenal ulcer) | 4.5 ug/kg | w333 | Peptic ulcers                                     | Parallel  | Unspecified method     | Double                                 | Yes                  | 39              | 19   |
| Jaszewski 1988                 | 40 ug     | w334 | Peptic ulcers                                     | Parallel  | Unspecified method     | Double                                 | Yes                  | 10              | 15   |
| Euler 1989 B                   | 40 ug     | w335 | Peptic ulcers                                     | Parallel  | Unspecified method     | Double                                 | Yes                  | 64              | 60   |
| Euler 1987                     | 40 ug     | w336 | Peptic ulcers                                     | Parallel  | Sealed envelopes       | Double                                 | Yes                  | 40              | 44   |
| Euler 1990 A                   | 40 ug     | w337 | Peptic ulcers                                     | Parallel  | Unspecified method     | Double                                 | Yes                  | 8               | 24   |
| Euler 1990 C                   | 40 ug     | w337 | Peptic ulcers                                     | Parallel  | Unspecified method     | Double                                 | Yes                  | 32              | 34   |
| Jaszewski 1987                 | 40 ug     | w338 | Peptic ulcers                                     | Parallel  | Unspecified method     | Double                                 | No                   | 15              | 16   |
| Euler 1989 A                   | 50 ug     | w339 | Peptic ulcers                                     | Parallel  | Unspecified method     | Double                                 | Yes                  | 23              | 20   |
| Euler 1990 D                   | 100 ug    | w340 | Peptic ulcers                                     | Parallel  | Unspecified method     | Double                                 | Yes                  | 211             | 207  |

**Webtable 2 (cont.): Details of trials involving a randomised comparison of a prostaglandin analogue (X) versus control (Y)**

| Trial name                           | Regimen | Ref. | Indication for treatment         | Design   | Allocation Concealment | Blinding of investigators and patients | Availability of data | No. of patients |     |
|--------------------------------------|---------|------|----------------------------------|----------|------------------------|----------------------------------------|----------------------|-----------------|-----|
|                                      |         |      |                                  |          |                        |                                        |                      | NX              | NY  |
| Euler 1989 A                         | 100 ug  | w339 | Peptic ulcers                    | Parallel | Unspecified method     | Double                                 | Yes                  | 21              | 20  |
| Euler 1990 B                         | 100 ug  | w337 | Peptic ulcers                    | Parallel | Unspecified method     | Double                                 | Yes                  | 31              | 30  |
| Euler 1990 C                         | 100 ug  | w337 | Peptic ulcers                    | Parallel | Unspecified method     | Double                                 | Yes                  | 28              | 34  |
| Euler 1990 D                         | 200 ug  | w340 | Peptic ulcers                    | Parallel | Unspecified method     | Double                                 | Yes                  | 212             | 207 |
| Euler 1990 C                         | 200 ug  | w337 | Peptic ulcers                    | Parallel | Unspecified method     | Double                                 | Yes                  | 23              | 34  |
| Chen 1980 B                          | 300 ug  | w341 | Peptic ulcers                    | Parallel | Unspecified method     | Double                                 | Yes                  | 17              | 16  |
| Vantrappen 1982                      | 400 ug  | w342 | Peptic ulcers                    | Parallel | Unspecified method     | Double                                 | Yes                  | 89              | 92  |
| Karim 1976 A                         | 600 ug  | w332 | Peptic ulcers                    | Parallel | Unspecified method     | Double                                 | Yes                  | 10              | 10  |
| <b><i>Enprostil vs Control</i></b>   |         |      |                                  |          |                        |                                        |                      |                 |     |
| Dal Monte 1988                       | 70 ug   | w343 | Peptic ulcers                    | Parallel | Unspecified method     | Double                                 | Yes                  | 21              | 21  |
| Schubert 1989                        | 70 ug   | w344 | Peptic ulcers                    | Parallel | Other method           | Double                                 | Yes                  | 63              | 64  |
| Bright-Asare 1986 A                  | 70 ug   | w345 | Peptic ulcers                    | Parallel | Unspecified method     | Double                                 | Yes                  | 43              | 44  |
| Navert 1986                          | 70 ug   | w346 | Peptic ulcers                    | Parallel | Unspecified method     | Double                                 | Yes                  | 44              | 42  |
| Thomson 1986                         | 70 ug   | w347 | Peptic ulcers                    | Parallel | Unspecified method     | Double                                 | Yes                  | 40              | 36  |
| Sontag 1994                          | 70 ug   | w348 | Peptic ulcers                    | Parallel | Closed list            | Double                                 | No                   | 37              | 43  |
| Sontag 1994                          | 105 ug  | w348 | Peptic ulcers                    | Parallel | Closed list            | Double                                 | No                   | 39              | 43  |
| Navert 1986                          | 140 ug  | w346 | Peptic ulcers                    | Parallel | Unspecified method     | Double                                 | Yes                  | 43              | 42  |
| Thomson 1986                         | 140 ug  | w347 | Peptic ulcers                    | Parallel | Unspecified method     | Double                                 | Yes                  | 36              | 36  |
| <b><i>Misoprostol vs Control</i></b> |         |      |                                  |          |                        |                                        |                      |                 |     |
| Agrawal 1985                         | 100 ug  | w349 | Peptic ulcers                    | Parallel | Unspecified method     | Double                                 | Yes                  | 107             | 103 |
| Lam 1986                             | 200 ug  | w350 | Peptic ulcers                    | Parallel | Unspecified method     | Double                                 | No                   | 77              | 76  |
| Brand 1985                           | 200 ug  | w351 | Peptic ulcers                    | Parallel | Unspecified method     | Double                                 | Yes                  | 101             | 100 |
| Lam 1986                             | 300 ug  | w350 | Peptic ulcers                    | Parallel | Unspecified method     | Double                                 | No                   | 76              | 76  |
| Agrawal 1985                         | 400 ug  | w349 | Peptic ulcers                    | Parallel | Unspecified method     | Double                                 | Yes                  | 94              | 103 |
| Bright-Asare 1986 B                  | 400 ug  | w352 | Peptic ulcers                    | Parallel | Unspecified method     | Double                                 | Yes                  | 118             | 111 |
| Sontag 1985                          | 400 ug  | w353 | Peptic ulcers                    | Parallel | Unspecified method     | Double                                 | Yes                  | 142             | 144 |
| Mazure 1985                          | 400 ug  | w354 | Peptic ulcers                    | Parallel | Pharmacy               | Double                                 | Yes                  | 16              | 19  |
| Brand 1985                           | 800 ug  | w351 | Peptic ulcers                    | Parallel | Unspecified method     | Double                                 | Yes                  | 107             | 100 |
| Ahmed 1991 A                         | 800 ug  | w355 | Peptic ulcers                    | Parallel | Unspecified method     | Double                                 | Yes                  | 25              | 25  |
| Bright-Asare 1986 B                  | 800 ug  | w352 | Peptic ulcers                    | Parallel | Unspecified method     | Double                                 | Yes                  | 101             | 111 |
| Jaszewski 1992                       | 800 ug  | w356 | Peptic ulcers                    | Parallel | Unspecified method     | Double                                 | Yes                  | 77              | 85  |
| Newman 1987                          | 800 ug  | w357 | Peptic ulcers                    | Parallel | Unspecified method     | Double                                 | Yes                  | 117             | 108 |
| Roth 1989                            | 800 ug  | w358 | Peptic ulcers                    | Parallel | Unspecified method     | Double                                 | Yes                  | 123             | 116 |
| Barakat 1984 B                       | Unknown | w359 | Peptic ulcers                    | Parallel | Unspecified method     | Double                                 | Yes                  | 35              | 16  |
| <b><i>Rebamipide vs Control</i></b>  |         |      |                                  |          |                        |                                        |                      |                 |     |
| Terano 2007                          | 300 mg  | w360 | Peptic ulcers                    | Parallel | Unspecified method     | Double                                 | Yes                  | 157             | 152 |
| Hahm 1998                            | 300 mg  | w361 | Peptic ulcers                    | Parallel | Unspecified method     | Unknown                                | Yes                  | 36              | 21  |
| Fujioka 2003                         | 300 mg  | w362 | Peptic ulcers                    | Parallel | Unspecified method     | Double                                 | Yes                  | 104             | 102 |
| Sawaguchi 2011                       | 300 mg  | w363 | Endoscopic submucosal dissection | Parallel | Unspecified method     | Unknown                                | No                   | 30              | 30  |
| Kato 2010 A                          | 300 mg  | w364 | Endoscopic submucosal dissection | Parallel | Other method           | Unknown                                | Yes                  | 31              | 31  |
| Fujiwara 2011                        | 300 mg  | w365 | Endoscopic submucosal dissection | Parallel | Closed list            | Open                                   | Yes                  | 30              | 34  |
| Nebiki 1998                          | 900 mg  | w366 | Peptic ulcers                    | Parallel | Sealed envelopes       | Unknown                                | Yes                  | 60              | 60  |
| Higuchi 1998                         | 900 mg  | w367 | Peptic ulcers                    | Parallel | Unspecified method     | Unknown                                | Yes                  | 20              | 20  |
| <b><i>Rioprostil vs Control</i></b>  |         |      |                                  |          |                        |                                        |                      |                 |     |
| Caldwell 1989                        | 400 ug  | w368 | Peptic ulcers                    | Parallel | Unspecified method     | Double                                 | Yes                  | 30              | 26  |
| Boucekkine 1989                      | 600 ug  | w369 | Peptic ulcers                    | Parallel | Sealed envelopes       | Double                                 | Yes                  | 57              | 58  |
| Benvestito 1988                      | 600 ug  | w370 | Peptic ulcers                    | Parallel | Unspecified method     | Double                                 | Yes                  | 16              | 16  |
| Caldwell 1989                        | 1200 ug | w368 | Peptic ulcers                    | Parallel | Unspecified method     | Double                                 | Yes                  | 26              | 26  |



**Webtable 2 (cont.): Details of trials involving a randomised comparison of a prostaglandin analogue (X) versus control (Y)**

| Trial name                 | Regimen | Ref. | Indication for treatment | Design   | Allocation Concealment | Blinding of investigators and patients | Availability of data | No. of patients |    |
|----------------------------|---------|------|--------------------------|----------|------------------------|----------------------------------------|----------------------|-----------------|----|
|                            |         |      |                          |          |                        |                                        |                      | NX              | NY |
| <i>Other PA vs Control</i> |         |      |                          |          |                        |                                        |                      |                 |    |
| Chen 1980 B                | 1.5 mg  | w341 | Peptic ulcers            | Parallel | Unspecified method     | Double                                 | Yes                  | 19              | 16 |

Design: Parallel=parallel trial. Factorial=Factorial trial. 'Extension' studies are studies in which patients are randomised more than once during the trial (only the parts of the trial that involve a valid randomised comparison for this meta-analysis, labelled X1, X2 etc., are shown in this table). Data shown for crossover trials reflect only events during the first phase of the trial. The suffixes A, B, C, D are used to distinguish different trials published by the same author in the same year.

Allocation concealment: IVRS (Interactive Voice Response System); Telephone (telephone central office); Pharmacy (pharmacy coded containers administered sequentially); Onsite computer (onsite computer accessible only after entering patient details); Sealed envelopes (sequentially numbered, opaque or without further specification); Closed list (closed list of random numbers); Other (other specified method); Unspecified (stated as being 'randomised' but with no other details).

Blinding of investigators and patients: Single=single-blind; Double=double-blind; Open=open label.

Availability of data: Data available for at least one endpoint of interest in the meta-analyses.

In cases where the number randomised was not reported, the number evaluated was used instead. In addition, for crossover trials, where neither the number randomised nor the number evaluated was reported, the total number of participants divided by number of arms was used.

**Webtable 3: Details of trials involving a randomised comparison of a histamine-2 receptor antagonists (X) versus control (Y)**

| Trial name                            | Regimen    | Ref. | Indication for treatment                          | Design    | Allocation Concealment | Blinding of investigators and patients | Availability of data | No. of patients |     |
|---------------------------------------|------------|------|---------------------------------------------------|-----------|------------------------|----------------------------------------|----------------------|-----------------|-----|
|                                       |            |      |                                                   |           |                        |                                        |                      | NX              | NY  |
| <b>Prevention Trials</b>              |            |      |                                                   |           |                        |                                        |                      |                 |     |
| <i>Cimetidine vs Control</i>          |            |      |                                                   |           |                        |                                        |                      |                 |     |
| Yilmaz 1996                           | 32.5 mg/kg | w371 | Warts                                             | Parallel  | Unspecified method     | Double                                 | No                   | 35              | 35  |
| Bergstrand 1985                       | 100 mg     | w372 | Asthma                                            | Parallel  | Unspecified method     | Double                                 | No                   | 13              | 7   |
| Hui 1992                              | 200 mg     | w373 | Recently healed ulcers                            | Parallel  | Unspecified method     | Single                                 | Yes                  | 98              | 103 |
| Furman 1982                           | 300 mg     | w374 | Gastro-oesophageal reflux                         | Parallel  | Unspecified method     | Double                                 | No                   | -               | -   |
| Kibblewhite 1990                      | 300 mg     | w375 | Post nasal drip                                   | Parallel  | Unspecified method     | Double                                 | No                   | 9               | 11  |
| Welch 1978                            | 300 mg     | w376 | Antiplatelet therapy                              | Crossover | Unspecified method     | Double                                 | No                   | 13              | 13  |
| Roth 1987 X2                          | 400 mg     | w377 | Arthritis, rheumatic or musculoskeletal disorders | Extension | Unspecified method     | Double                                 | Yes                  | 12              | 14  |
| Wu 2008                               | 400 mg     | w378 | Urticaria                                         | Parallel  | Unspecified method     | Open                                   | No                   | 33              | 34  |
| Sonnenberg 1979 X2                    | 400 mg     | w379 | Recently healed ulcers                            | Extension | Unspecified method     | Double                                 | Yes                  | 24              | 23  |
| Kokron 1993                           | 400 mg     | w380 | Renal cell cancer                                 | Parallel  | Unspecified method     | Unknown                                | Yes                  | 25              | 19  |
| Löf 1987                              | 400 mg     | w381 | Recently healed ulcers                            | Parallel  | Unspecified method     | Double                                 | Yes                  | 49              | 50  |
| Becker 1984                           | 400 mg     | w382 | Recently healed ulcers                            | Parallel  | Unspecified method     | Double                                 | Yes                  | 30              | 26  |
| Sontag 1984                           | 400 mg     | w383 | Recently healed ulcers                            | Parallel  | Unspecified method     | Double                                 | Yes                  | 76              | 81  |
| Sontag 1984                           | 400 mg     | w383 | Recently healed ulcers                            | Parallel  | Unspecified method     | Double                                 | Yes                  | 91              | 81  |
| Kinloch 1984                          | 400 mg     | w384 | Recently healed ulcers                            | Parallel  | Unspecified method     | Double                                 | Yes                  | 24              | 27  |
| Visconti 1983                         | 400 mg     | w385 | Recently healed ulcers                            | Parallel  | Unspecified method     | Unknown                                | Yes                  | 20              | 20  |
| Moshal 1982                           | 400 mg     | w386 | Recently healed ulcers                            | Parallel  | Unspecified method     | Double                                 | Yes                  | 20              | 20  |
| Bardhan 1988 A                        | 400 mg     | w387 | Recently healed ulcers                            | Parallel  | Unspecified method     | Double                                 | Yes                  | 64              | 62  |
| Eichenberger 1982 X2                  | 400 mg     | w388 | Recently healed ulcers                            | Extension | Unspecified method     | Double                                 | Yes                  | 13              | 12  |
| Ubilluz 1982                          | 400 mg     | w389 | Recently healed ulcers                            | Parallel  | Unspecified method     | Double                                 | Yes                  | 15              | 15  |
| Sontag 1981                           | 400 mg     | w390 | Recently healed ulcers                            | Parallel  | Unspecified method     | Double                                 | Yes                  | 46              | 49  |
| Sontag 1981                           | 400 mg     | w390 | Recently healed ulcers                            | Parallel  | Unspecified method     | Double                                 | Yes                  | 68              | 49  |
| Da Silva 1981                         | 400 mg     | w391 | Recently healed ulcers                            | Parallel  | Unspecified method     | Double                                 | Yes                  | 9               | 7   |
| Salera 1979                           | 400 mg     | w392 | Recently healed ulcers                            | Parallel  | Unspecified method     | Double                                 | Yes                  | 67              | 66  |
| Cocco 1981                            | 400 mg     | w393 | Recently healed ulcers                            | Parallel  | Unspecified method     | Unknown                                | No                   | -               | -   |
| Bianchi Porro 1979                    | 400 mg     | w394 | Recently healed ulcers                            | Parallel  | Unspecified method     | Double                                 | Yes                  | 25              | 25  |
| Massarrat 1982                        | 400 mg     | w395 | Recently healed ulcers                            | Parallel  | Unspecified method     | Unknown                                | Yes                  | 29              | 14  |
| Massarrat 1982                        | 400 mg     | w395 | Recently healed ulcers                            | Parallel  | Unspecified method     | Unknown                                | Yes                  | 23              | 14  |
| Dew 1984                              | 400 mg     | w396 | Recently healed ulcers                            | Parallel  | Onsite computer        | Double                                 | Yes                  | 22              | 22  |
| Fitzpatrick 1982                      | 400 mg     | w397 | Recently healed ulcers                            | Parallel  | Unspecified method     | Double                                 | Yes                  | 19              | 17  |
| Berstad 1979 B                        | 400 mg     | w398 | Recently healed ulcers                            | Parallel  | Unspecified method     | Double                                 | Yes                  | 20              | 24  |
| Broor 1983                            | 400 mg     | w399 | Recently healed ulcers                            | Parallel  | Unspecified method     | Double                                 | Yes                  | 15              | 15  |
| Hentschel 1983                        | 400 mg     | w400 | Recently healed ulcers                            | Parallel  | Unspecified method     | Double                                 | Yes                  | 54              | 54  |
| Hui 1992                              | 400 mg     | w373 | Recently healed ulcers                            | Parallel  | Unspecified method     | Single                                 | Yes                  | 94              | 103 |
| Piper 1986                            | 400 mg     | w401 | Recently healed ulcers                            | Parallel  | Unspecified method     | Double                                 | Yes                  | 88              | 82  |
| Pym 1990 (gastric ulcer)              | 400 mg     | w402 | Recently healed ulcers                            | Parallel  | Other method           | Double                                 | Yes                  | 97              | 87  |
| Pym 1990 (duodenal ulcer)             | 400 mg     | w402 | Recently healed ulcers                            | Parallel  | Other method           | Double                                 | Yes                  | 60              | 67  |
| Sonnenberg 1981 X2                    | 400 mg     | w403 | Recently healed ulcers                            | Extension | Closed list            | Double                                 | Yes                  | 34              | 32  |
| Marks 1989                            | 400 mg     | w404 | Recently healed ulcers                            | Parallel  | Unspecified method     | Single                                 | Yes                  | 39              | 39  |
| Murray 1991                           | 400 mg     | w405 | Gastro-oesophageal reflux                         | Parallel  | Unspecified method     | Double                                 | No                   | 20              | 17  |
| Kaul 1986                             | 400 mg     | w406 | Gastro-oesophageal reflux                         | Parallel  | Unspecified method     | Double                                 | Yes                  | 14              | 10  |
| Kumar 1990                            | 400 mg     | w407 | Recently healed ulcers                            | Parallel  | Unspecified method     | Double                                 | Yes                  | 50              | 50  |
| Salim 1993 A                          | 400 mg     | w408 | Recently healed ulcers                            | Parallel  | Unspecified method     | Double                                 | Yes                  | 75              | 76  |
| Salim 1993 B                          | 400 mg     | w409 | Recently healed ulcers                            | Parallel  | Sealed envelopes       | Unknown                                | Yes                  | 37              | 35  |
| Young 1989 B                          | 400 mg     | w410 | Recently healed ulcers                            | Parallel  | Unspecified method     | Unknown                                | Yes                  | 45              | 43  |
| Takemoto 1987 (healed gastric ulcer)  | 400 mg     | w411 | Recently healed ulcers                            | Parallel  | Unspecified method     | Double                                 | Yes                  | 48              | 39  |
| Takemoto 1987 (healed duodenal ulcer) | 400 mg     | w411 | Recently healed ulcers                            | Parallel  | Unspecified method     | Double                                 | Yes                  | 36              | 35  |
| Rohner 1985                           | 400 mg     | w412 | Recently healed ulcers                            | Parallel  | Unspecified method     | Double                                 | No                   | -               | -   |
| Burland 1980                          | 400 mg     | w413 | Recently healed ulcers                            | Parallel  | Unspecified method     | Double                                 | Yes                  | 179             | 333 |
| Gray 1978 (completely healed ulcers)  | 400 mg     | w414 | Recently healed ulcers                            | Parallel  | Unspecified method     | Double                                 | Yes                  | 27              | 27  |

**Webtable 3 (cont.): Details of trials involving a randomised comparison of a histamine-2 receptor antagonists (X) versus control (Y)**

| Trial name                           | Regimen | Ref. | Indication for treatment  | Design    | Allocation Concealment | Blinding of investigators and patients | Availability of data | No. of patients |     |
|--------------------------------------|---------|------|---------------------------|-----------|------------------------|----------------------------------------|----------------------|-----------------|-----|
|                                      |         |      |                           |           |                        |                                        |                      | NX              | NY  |
| Salim 1990                           | 400 mg  | w415 | Recently healed ulcers    | Parallel  | Sealed envelopes       | Unknown                                | Yes                  | 77              | 74  |
| Jean 1985 (healed duodenal ulcer)    | 600 mg  | w416 | Recently healed ulcers    | Parallel  | Unspecified method     | Unknown                                | Yes                  | 25              | 24  |
| Jean 1985 (healed gastric ulcer)     | 600 mg  | w416 | Recently healed ulcers    | Parallel  | Unspecified method     | Double                                 | Yes                  | 11              | 9   |
| Sontag 1984                          | 600 mg  | w383 | Recently healed ulcers    | Parallel  | Unspecified method     | Double                                 | Yes                  | 172             | 81  |
| Leão 1980                            | 600 mg  | w417 | Recently healed ulcers    | Parallel  | Unspecified method     | Double                                 | Yes                  | 6               | 3   |
| Sontag 1981                          | 600 mg  | w390 | Recently healed ulcers    | Parallel  | Unspecified method     | Double                                 | Yes                  | 115             | 49  |
| Aubia 1980                           | 600 mg  | w418 | Pruritis                  | Parallel  | Unspecified method     | Unknown                                | No                   | 6               | 7   |
| Lai 1982                             | 600 mg  | w419 | End stage renal disease   | Parallel  | Unspecified method     | Open                                   | No                   | 9               | 6   |
| Paoluzi 1985                         | 600 mg  | w420 | Recently healed ulcers    | Parallel  | Unspecified method     | Double                                 | Yes                  | 30              | 26  |
| Libeskind 1983                       | 600 mg  | w421 | Recently healed ulcers    | Parallel  | Unspecified method     | Single                                 | Yes                  | 35              | 31  |
| Stoa-Birketvedt 1993                 | 600 mg  | w422 | Weight loss               | Parallel  | Unspecified method     | Double                                 | No                   | 30              | 30  |
| Rasmussen 1993                       | 600 mg  | w423 | Weight loss               | Parallel  | Unspecified method     | Double                                 | No                   | 30              | 30  |
| Langman 1999                         | 600 mg  | w424 | Gastric cancer            | Parallel  | IVRS                   | Double                                 | Yes                  | 218             | 224 |
| Huang 2007                           | 800 mg  | w425 | Rectal cancer             | Parallel  | Unspecified method     | Open                                   | No                   | 30              | 30  |
| Macphee 1984                         | 800 mg  | w426 | Healthy volunteers        | Crossover | Unspecified method     | Unknown                                | No                   | 4               | 4   |
| Thilagarajah 2001                    | 800 mg  | w427 | Painful bladder disease   | Parallel  | Unspecified method     | Double                                 | No                   | 17              | 17  |
| La Brooy 1980                        | 800 mg  | w428 | Recently healed ulcers    | Parallel  | Unspecified method     | Double                                 | Yes                  | 15              | 14  |
| Farup 1990                           | 800 mg  | w429 | Gastro-oesophageal reflux | Parallel  | Unspecified method     | Double                                 | Yes                  | 29              | 29  |
| Danielsson 1981 X2                   | 800 mg  | w430 | Recently healed ulcers    | Extension | Unspecified method     | Double                                 | Yes                  | 23              | 25  |
| Frank 1989 C                         | 800 mg  | w431 | Healthy volunteers        | Parallel  | Unspecified method     | Double                                 | Yes                  | 18              | 21  |
| Frank 1989 C                         | 800 mg  | w431 | Healthy volunteers        | Parallel  | Unspecified method     | Double                                 | Yes                  | 18              | 21  |
| Barr 1983                            | 800 mg  | w432 | Recently healed ulcers    | Parallel  | Other method           | Double                                 | Yes                  | 27              | 30  |
| Korman 1980                          | 800 mg  | w433 | Recently healed ulcers    | Parallel  | Unspecified method     | Double                                 | Yes                  | 15              | 26  |
| Jensen 1980                          | 800 mg  | w434 | Recently healed ulcers    | Parallel  | Closed list            | Double                                 | Yes                  | 35              | 35  |
| Kang 1980                            | 800 mg  | w435 | Recently healed ulcers    | Parallel  | Unspecified method     | Double                                 | No                   | 16              | 15  |
| Nyren 1986                           | 800 mg  | w436 | Gastro-oesophageal reflux | Parallel  | Unspecified method     | Double                                 | No                   | 51              | 54  |
| Bardhan 1979 (healed duodenal ulcer) | 800 mg  | w437 | Recently healed ulcers    | Parallel  | Unspecified method     | Double                                 | Yes                  | 32              | 33  |
| Dronfield 1979                       | 800 mg  | w438 | Recently healed ulcers    | Parallel  | Pharmacy               | Double                                 | Yes                  | 22              | 22  |
| Bijlsma 1988                         | 800 mg  | w439 | Antiplatelet therapy      | Parallel  | Unspecified method     | Double                                 | No                   | 64              | 63  |
| Anderson 1985                        | 800 mg  | w440 | Bronchiectasis            | Crossover | Unspecified method     | Double                                 | No                   | 6               | 6   |
| Blackwood 1978                       | 800 mg  | w441 | Recently healed ulcers    | Parallel  | Unspecified method     | Double                                 | Yes                  | 28              | 27  |
| Bodemar 1979 A                       | 800 mg  | w442 | Recently healed ulcers    | Parallel  | Unspecified method     | Double                                 | Yes                  | 32              | 36  |
| Hetzel 1978 B                        | 800 mg  | w443 | Recently healed ulcers    | Parallel  | Unspecified method     | Double                                 | Yes                  | 36              | 31  |
| Gudmand-Høyer 1978                   | 800 mg  | w444 | Recently healed ulcers    | Parallel  | Unspecified method     | Double                                 | Yes                  | 29              | 28  |
| Frost 1979 X2                        | 800 mg  | w445 | Recently healed ulcers    | Extension | Unspecified method     | Double                                 | Yes                  | 11              | 12  |
| Colle 1988                           | 800 mg  | w446 | Healthy volunteers        | Parallel  | Closed list            | Double                                 | No                   | 8               | 8   |
| Matsumoto 1996                       | 800 mg  | w447 | Colorectal cancer         | Parallel  | Unspecified method     | Unknown                                | Yes                  | 34              | 30  |
| Johnsson 1993                        | 800 mg  | w448 | Gastro-oesophageal reflux | Parallel  | Unspecified method     | Double                                 | Yes                  | 124             | 127 |
| Hetzel 1979                          | 800 mg  | w449 | Recently healed ulcers    | Parallel  | Unspecified method     | Double                                 | Yes                  | 28              | 28  |
| Hansky 1979                          | 800 mg  | w450 | Recently healed ulcers    | Parallel  | Unspecified method     | Double                                 | Yes                  | 20              | 20  |
| Mekel 1978                           | 800 mg  | w451 | Recently healed ulcers    | Parallel  | Unspecified method     | Double                                 | Yes                  | 33              | 14  |
| Nesland 1985                         | 800 mg  | w452 | Gastro-oesophageal reflux | Parallel  | Unspecified method     | Double                                 | No                   | 50              | 50  |
| Svendsen 1995                        | 800 mg  | w453 | Colorectal cancer         | Parallel  | Unspecified method     | Double                                 | No                   | 98              | 91  |
| Talley 1986                          | 800 mg  | w454 | Gastro-oesophageal reflux | Crossover | Unspecified method     | Double                                 | No                   | 29              | 29  |
| Singal 1989                          | 800 mg  | w455 | Gastro-oesophageal reflux | Parallel  | Unspecified method     | Double                                 | No                   | 33              | 34  |
| Riemann 1991                         | 800 mg  | w456 | Gastro-oesophageal reflux | Parallel  | Unspecified method     | Double                                 | Yes                  | 80              | 82  |
| Burland 1980                         | 800 mg  | w413 | Recently healed ulcers    | Parallel  | Unspecified method     | Double                                 | Yes                  | 184             | 333 |
| Rugstad 1994                         | 800 mg  | w457 | Antiplatelet therapy      | Parallel  | Unspecified method     | Double                                 | No                   | 285             | 285 |
| Gotthard 1988                        | 800 mg  | w458 | Gastro-oesophageal reflux | Parallel  | Unspecified method     | Double                                 | Yes                  | 73              | 75  |
| Lee 2001                             | 800 mg  | w459 | Planar warts              | Parallel  | Unspecified method     | Unknown                                | No                   | 9               | 8   |
| Tonnesen 1988                        | 800 mg  | w460 | Gastric cancer            | Parallel  | Telephone              | Double                                 | Yes                  | 68              | 77  |

**Webtable 3 (cont.): Details of trials involving a randomised comparison of a histamine-2 receptor antagonists (X) versus control (Y)**

| Trial name                     | Regimen | Ref. | Indication for treatment                          | Design    | Allocation Concealment | Blinding of investigators and patients | Availability of data | No. of patients |     |
|--------------------------------|---------|------|---------------------------------------------------|-----------|------------------------|----------------------------------------|----------------------|-----------------|-----|
|                                |         |      |                                                   |           |                        |                                        |                      | NX              | NY  |
| Carpenter 1983                 | 900 mg  | w461 | Allergic rhinitis                                 | Crossover | Unspecified method     | Double                                 | No                   | 12              | 12  |
| Mackinnon 1982                 | 1000 mg | w462 | Gastritis or duodenitis                           | Parallel  | Unspecified method     | Double                                 | No                   | 14              | 12  |
| Niv 1990                       | 1000 mg | w463 | Gastritis or duodenitis                           | Parallel  | Unspecified method     | Double                                 | Yes                  | 10              | 7   |
| Rune 1980                      | 1000 mg | w464 | Recently healed ulcers                            | Parallel  | Unspecified method     | Double                                 | Yes                  | 25              | 20  |
| Bennett 1980                   | 1000 mg | w465 | Gastro-oesophageal reflux                         | Parallel  | Unspecified method     | Unknown                                | No                   | -               | -   |
| Willing 1980                   | 1000 mg | w466 | Gastritis or duodenitis                           | Parallel  | Unspecified method     | Double                                 | No                   | 11              | 10  |
| Camari 1980                    | 1000 mg | w467 | Rheumatoid arthritis                              | Crossover | Unspecified method     | Double                                 | No                   | 4               | 4   |
| Breen 1983                     | 1000 mg | w468 | Gastro-oesophageal reflux                         | Parallel  | Sealed envelopes       | Double                                 | No                   | 14              | 13  |
| Hamid 1983                     | 1000 mg | w469 | Crohn's disease                                   | Parallel  | Unspecified method     | Double                                 | No                   | 18              | 18  |
| Kelbaek 1985                   | 1000 mg | w470 | Gastro-oesophageal reflux                         | Parallel  | Unspecified method     | Double                                 | No                   | 24              | 26  |
| Machell 1979                   | 1000 mg | w471 | Recently healed ulcers                            | Parallel  | Unspecified method     | Double                                 | Yes                  | 12              | 14  |
| Brown 1979                     | 1000 mg | w472 | Gastro-oesophageal reflux                         | Parallel  | Unspecified method     | Double                                 | No                   | 11              | 11  |
| Bardhan 1982                   | 1000 mg | w473 | Recently healed ulcers                            | Parallel  | Unspecified method     | Double                                 | Yes                  | 66              | 65  |
| Popoola 1978 (antrodoodenitis) | 1000 mg | w474 | Gastritis or duodenitis                           | Parallel  | Unspecified method     | Double                                 | Yes                  | 5               | 4   |
| Sillero 1981                   | 1053 mg | w475 | Acute pancreatitis                                | Parallel  | Sealed envelopes       | Double                                 | Yes                  | 30              | 30  |
| Perez De Oteyza 1980           | 1067 mg | w476 | Acute pancreatitis                                | Parallel  | Unspecified method     | Double                                 | Yes                  | 20              | 20  |
| Roth 1987 X1                   | 1200 mg | w377 | Arthritis, rheumatic or musculoskeletal disorders | Extension | Unspecified method     | Double                                 | Yes                  | 54              | 50  |
| Støa-Birketvedt 1998           | 1200 mg | w477 | Diabetes                                          | Parallel  | Unspecified method     | Double                                 | No                   | 31              | 31  |
| Bendayan 1993                  | 1200 mg | w478 | Healthy volunteers                                | Crossover | Unspecified method     | Double                                 | No                   | 23              | 23  |
| Bright-Asare 1980              | 1200 mg | w479 | Gastro-oesophageal reflux                         | Parallel  | Unspecified method     | Double                                 | No                   | 20              | 10  |
| Cocco 1981                     | 1200 mg | w393 | Recently healed ulcers                            | Parallel  | Unspecified method     | Unknown                                | No                   | -               | -   |
| Layne 1981                     | 1200 mg | w480 | Neurological diseases                             | Parallel  | Unspecified method     | Double                                 | Yes                  | 16              | 20  |
| Cohen 1996                     | 1200 mg | w481 | HIV                                               | Parallel  | Unspecified method     | Double                                 | Yes                  | 94              | 88  |
| Ferguson 1979                  | 1200 mg | w482 | Gastro-oesophageal reflux                         | Crossover | Unspecified method     | Double                                 | No                   | 10              | 10  |
| Monroe 1981                    | 1200 mg | w483 | Urticaria                                         | Crossover | Unspecified method     | Double                                 | Yes                  | 9               | 9   |
| Behar 1978                     | 1200 mg | w484 | Gastro-oesophageal reflux                         | Parallel  | Unspecified method     | Double                                 | No                   | 49              | 45  |
| Greenblatt 1984                | 1200 mg | w485 | Insomnia                                          | Crossover | Unspecified method     | Double                                 | No                   | 5               | 5   |
| Hoogwerf 1984                  | 1200 mg | w486 | Healthy volunteers                                | Crossover | Unspecified method     | Double                                 | Yes                  | 12              | 12  |
| Yan 1999                       | 1200 mg | w487 | Gastrointestinal cancer                           | Parallel  | Unspecified method     | Open                                   | No                   | 25              | 24  |
| Augusto Larrain 1991           | 1200 mg | w488 | Gastro-oesophageal reflux                         | Parallel  | Unspecified method     | Unknown                                | No                   | 30              | 30  |
| Diller 1983                    | 1200 mg | w489 | Urticaria                                         | Crossover | Unspecified method     | Double                                 | No                   | 8               | 8   |
| Shanehsaz 2015                 | 1200 mg | w490 | Cutaneous leishmaniasis                           | Parallel  | Unspecified method     | Double                                 | Yes                  | 30              | 30  |
| Lissak 1989                    | 1500 mg | w491 | Healthy volunteers                                | Parallel  | Unspecified method     | Unknown                                | No                   | 12              | 8   |
| Lepsien 1979                   | 1600 mg | w492 | Gastro-oesophageal reflux                         | Parallel  | Unspecified method     | Double                                 | Yes                  | 16              | 20  |
| Wallach 1982                   | 1600 mg | w493 | Psoriasis                                         | Parallel  | Unspecified method     | Double                                 | No                   | 18              | 18  |
| Fiasse 1980                    | 1600 mg | w494 | Gastro-oesophageal reflux                         | Parallel  | Unspecified method     | Double                                 | Yes                  | 23              | 21  |
| Festen 1980                    | 1600 mg | w495 | Gastro-oesophageal reflux                         | Parallel  | Unspecified method     | Double                                 | No                   | 13              | 7   |
| Bleeheh 1987                   | 1600 mg | w496 | Urticaria                                         | Parallel  | Unspecified method     | Double                                 | No                   | 21              | 19  |
| Commens 1978                   | 1600 mg | w497 | Urticaria                                         | Crossover | Unspecified method     | Double                                 | No                   | -               | -   |
| Cook 1979                      | 1600 mg | w498 | Urticaria                                         | Parallel  | Unspecified method     | Double                                 | No                   | -               | -   |
| Palmer 1993                    | 1600 mg | w499 | Gastro-oesophageal reflux                         | Parallel  | Unspecified method     | Double                                 | No                   | 85              | 82  |
| Palmer 1993                    | 1600 mg | w499 | Gastro-oesophageal reflux                         | Parallel  | Unspecified method     | Double                                 | No                   | 83              | 82  |
| Sitsen 2000                    | 1600 mg | w500 | Healthy volunteers                                | Crossover | Unspecified method     | Double                                 | Yes                  | 6               | 6   |
| Powell-Jackson 1978            | 1600 mg | w501 | Gastro-oesophageal reflux                         | Crossover | Unspecified method     | Double                                 | No                   | 14              | 14  |
| Wesdorp 1978                   | 1600 mg | w502 | Gastro-oesophageal reflux                         | Parallel  | Unspecified method     | Double                                 | Yes                  | 13              | 13  |
| Palmer 1990                    | 1600 mg | w503 | Gastro-oesophageal reflux                         | Parallel  | Unspecified method     | Double                                 | Yes                  | 93              | 86  |
| Fitzpatrick 1986               | 1600 mg | w504 | Ileal resection                                   | Crossover | Unspecified method     | Unknown                                | No                   | 5               | 5   |
| Matthews 1979                  | 1600 mg | w505 | Demographism                                      | Crossover | Unspecified method     | Double                                 | No                   | 8               | 8   |
| Jameson 2014                   | 1600 mg | w506 | Colorectal cancer                                 | Parallel  | Unspecified method     | Double                                 | No                   | 65              | 63  |
| Bennett 1980                   | 2000 mg | w465 | Gastro-oesophageal reflux                         | Parallel  | Unspecified method     | Unknown                                | No                   | -               | -   |
| <b>Famotidine vs Control</b>   |         |      |                                                   |           |                        |                                        |                      |                 |     |
| Baglioni 1985                  | 20 mg   | w507 | Recently healed ulcers                            | Parallel  | Unspecified method     | Double                                 | Yes                  | 167             | 177 |

**Webtable 3 (cont.): Details of trials involving a randomised comparison of a histamine-2 receptor antagonists (X) versus control (Y)**

| Trial name                   | Regimen | Ref. | Indication for treatment                          | Design    | Allocation Concealment | Blinding of investigators and patients | Availability of data | No. of patients |     |
|------------------------------|---------|------|---------------------------------------------------|-----------|------------------------|----------------------------------------|----------------------|-----------------|-----|
|                              |         |      |                                                   |           |                        |                                        |                      | NX              | NY  |
| Berlin 1991                  | 20 mg   | w508 | Recently healed ulcers                            | Parallel  | Unspecified method     | Double                                 | Yes                  | 102             | 100 |
| Texter 1986                  | 20 mg   | w509 | Recently healed ulcers                            | Parallel  | Unspecified method     | Double                                 | Yes                  | 97              | 99  |
| Zaterka 1988 X2              | 20 mg   | w510 | Recently healed ulcers                            | Extension | Unspecified method     | Single                                 | Yes                  | 20              | 19  |
| Hongo 2008 A                 | 20 mg   | w511 | Gastro-oesophageal reflux                         | Parallel  | Closed list            | Double                                 | No                   | 177             | 178 |
| FAMOUS                       | 40 mg   | w512 | Antiplatelet therapy                              | Parallel  | Sealed envelopes       | Double                                 | Yes                  | 204             | 200 |
| Taha 1996                    | 40 mg   | w513 | Arthritis, rheumatic or musculoskeletal disorders | Parallel  | Closed list            | Double                                 | Yes                  | 95              | 93  |
| Kato 2005                    | 40 mg   | w514 | Gastro-oesophageal reflux                         | Crossover | Unspecified method     | Double                                 | No                   | 9               | 10  |
| Poyurovsky 2003              | 40 mg   | w515 | Acute psychosis                                   | Parallel  | Unspecified method     | Double                                 | Yes                  | 7               | 7   |
| Schwartz 1995                | 40 mg   | w516 | Healthy volunteers                                | Parallel  | Unspecified method     | Double                                 | Yes                  | 64              | 64  |
| Texter 1986                  | 40 mg   | w509 | Recently healed ulcers                            | Parallel  | Unspecified method     | Double                                 | Yes                  | 107             | 99  |
| Robinson 1991 B              | 40 mg   | w517 | Gastro-oesophageal reflux                         | Parallel  | Unspecified method     | Double                                 | No                   | 158             | 76  |
| Robinson 1991 B              | 40 mg   | w517 | Gastro-oesophageal reflux                         | Parallel  | Unspecified method     | Double                                 | No                   | 155             | 76  |
| Simon 1994 B                 | 40 mg   | w518 | Gastro-oesophageal reflux                         | Parallel  | Unspecified method     | Double                                 | No                   | 125             | 66  |
| Simon 1995 B                 | 40 mg   | w519 | Gastro-oesophageal reflux                         | Parallel  | Unspecified method     | Double                                 | No                   | 69              | 31  |
| Simon 1996                   | 40 mg   | w520 | Gastro-oesophageal reflux                         | Parallel  | Unspecified method     | Double                                 | Yes                  | 110             | 49  |
| Hongo 2008 A                 | 40 mg   | w511 | Gastro-oesophageal reflux                         | Parallel  | Closed list            | Double                                 | No                   | 174             | 178 |
| Liu 2003                     | 40 mg   | w521 | Recently healed ulcers                            | Parallel  | Closed list            | Unknown                                | Yes                  | 18              | 26  |
| Sabesin 1991                 | 40 mg   | w522 | Gastro-oesophageal reflux                         | Parallel  | Unspecified method     | Double                                 | Yes                  | 137             | 66  |
| Sabesin 1991                 | 40 mg   | w522 | Gastro-oesophageal reflux                         | Parallel  | Unspecified method     | Double                                 | Yes                  | 135             | 66  |
| Ohara 2010 A                 | 40 mg   | w523 | Gastro-oesophageal reflux                         | Parallel  | Unspecified method     | Unknown                                | No                   | 136             | 65  |
| Ohara 2010 B                 | 40 mg   | w524 | Gastro-oesophageal reflux                         | Parallel  | Closed list            | Double                                 | No                   | 163             | 169 |
| Hsu 2015                     | 40 mg   | w525 | Antiplatelet therapy                              | Parallel  | Unspecified method     | Double                                 | Yes                  | 115             | 123 |
| Hsu 2013                     | 40 mg   | w526 | Antiplatelet therapy                              | Parallel  | Unspecified method     | Unknown                                | Yes                  | 91              | 90  |
| REDUCE-1 and REDUCE-2        | 79.8 mg | w527 | Antiplatelet therapy                              | Parallel  | IVRS                   | Double                                 | Yes                  | 1022            | 513 |
| Hudson 1997                  | 80 mg   | w528 | Arthritis, rheumatic or musculoskeletal disorders | Parallel  | Unspecified method     | Double                                 | Yes                  | 39              | 39  |
| Taha 1996                    | 80 mg   | w513 | Arthritis, rheumatic or musculoskeletal disorders | Parallel  | Closed list            | Double                                 | Yes                  | 97              | 93  |
| Marrero 1994                 | 80 mg   | w529 | Gastro-oesophageal reflux                         | Parallel  | Unspecified method     | Double                                 | No                   | 14              | 13  |
| Schwartz 1995                | 80 mg   | w516 | Healthy volunteers                                | Parallel  | Unspecified method     | Double                                 | Yes                  | 64              | 64  |
| Simon 1994 B                 | 80 mg   | w518 | Gastro-oesophageal reflux                         | Parallel  | Unspecified method     | Double                                 | No                   | 127             | 66  |
| Simon 1995 B                 | 80 mg   | w519 | Gastro-oesophageal reflux                         | Parallel  | Unspecified method     | Double                                 | No                   | 72              | 31  |
| Simon 1996                   | 80 mg   | w520 | Gastro-oesophageal reflux                         | Parallel  | Unspecified method     | Double                                 | Yes                  | 108             | 49  |
| Mestre 2014                  | 80 mg   | w530 | Parkinson's disease                               | Crossover | Unspecified method     | Double                                 | No                   | 2               | 2   |
| Mestre 2014                  | 120 mg  | w530 | Parkinson's disease                               | Crossover | Unspecified method     | Double                                 | No                   | 2               | 2   |
| Mestre 2014                  | 160 mg  | w530 | Parkinson's disease                               | Crossover | Unspecified method     | Double                                 | No                   | 2               | 2   |
| Meskanen 2013                | 200 mg  | w531 | Schizophrenia                                     | Parallel  | Closed list            | Double                                 | Yes                  | 16              | 14  |
| <b>Lafutidine vs Control</b> |         |      |                                                   |           |                        |                                        |                      |                 |     |
| Namikawa 2014                | 10 mg   | w532 | Gastric cancer                                    | Parallel  | Sealed envelopes       | Unknown                                | No                   | 10              | 12  |
| Ohara 2010 A                 | 20 mg   | w523 | Gastro-oesophageal reflux                         | Parallel  | Unspecified method     | Unknown                                | No                   | 135             | 65  |
| Ohara 2010 B                 | 20 mg   | w524 | Gastro-oesophageal reflux                         | Parallel  | Closed list            | Double                                 | No                   | 169             | 169 |
| Kato 2010 B                  | 20 mg   | w533 | Antiplatelet therapy                              | Crossover | Unspecified method     | Double                                 | Yes                  | 8               | 8   |
| <b>Nizatidine vs Control</b> |         |      |                                                   |           |                        |                                        |                      |                 |     |
| Carlson 2002                 | 150 mg  | w534 | Alzheimer's Disease                               | Parallel  | Unspecified method     | Double                                 | No                   | 25              | 26  |
| Cerulli 1987                 | 150 mg  | w535 | Recently healed ulcers                            | Parallel  | Unspecified method     | Double                                 | Yes                  | 257             | 256 |
| Rampal 1994                  | 150 mg  | w536 | Recently healed ulcers                            | Parallel  | Other method           | Open                                   | Yes                  | 286             | 295 |
| GISU 1993                    | 150 mg  | w537 | Recently healed ulcers                            | Parallel  | Unspecified method     | Double                                 | Yes                  | 123             | 118 |
| Levine 1993                  | 300 mg  | w538 | Osteoarthritis                                    | Parallel  | Unspecified method     | Double                                 | Yes                  | 248             | 248 |
| Cavazzoni 2003               | 300 mg  | w539 | Schizophrenia                                     | Parallel  | Unspecified method     | Double                                 | No                   | 57              | 60  |
| Dammann 1990                 | 300 mg  | w540 | Healthy volunteers                                | Crossover | Unspecified method     | Single                                 | Yes                  | 4               | 4   |
| Hansen 1998                  | 300 mg  | w541 | Gastro-oesophageal reflux                         | Parallel  | Onsite computer        | Double                                 | No                   | 111             | 110 |
| Cloud 1991                   | 300 mg  | w542 | Gastro-oesophageal reflux                         | Parallel  | Onsite computer        | Double                                 | Yes                  | 151             | 160 |
| Cloud 1991                   | 300 mg  | w542 | Gastro-oesophageal reflux                         | Parallel  | Onsite computer        | Double                                 | Yes                  | 155             | 160 |

**Webtable 3 (cont.): Details of trials involving a randomised comparison of a histamine-2 receptor antagonists (X) versus control (Y)**

| Trial name                           | Regimen | Ref. | Indication for treatment                          | Design    | Allocation Concealment | Blinding of investigators and patients | Availability of data | No. of patients |     |
|--------------------------------------|---------|------|---------------------------------------------------|-----------|------------------------|----------------------------------------|----------------------|-----------------|-----|
|                                      |         |      |                                                   |           |                        |                                        |                      | NX              | NY  |
| Atmaca 2003 A                        | 300 mg  | w543 | Schizophrenia                                     | Parallel  | Unspecified method     | Double                                 | No                   | 18              | 17  |
| Atmaca 2004 B                        | 300 mg  | w544 | Schizophrenia                                     | Parallel  | Unspecified method     | Double                                 | No                   | 14              | 14  |
| Cloud 1992 A                         | 300 mg  | w545 | Gastro-oesophageal reflux                         | Parallel  | Closed list            | Double                                 | Yes                  | 168             | 178 |
| Dobrilla 1992                        | 300 mg  | w546 | Gastro-oesophageal reflux                         | Parallel  | Unspecified method     | Double                                 | No                   | 58              | 59  |
| Koskenpato 2008                      | 300 mg  | w547 | Gastro-oesophageal reflux                         | Crossover | Unspecified method     | Double                                 | No                   | 8               | 8   |
| Quik 1990                            | 300 mg  | w548 | Osteoarthritis                                    | Parallel  | Unspecified method     | Double                                 | No                   | 109             | 107 |
| Cloud 1989 B X4                      | 300 mg  | w549 | Recently healed ulcers                            | Extension | Unspecified method     | Double                                 | Yes                  | 198             | 95  |
| Cavazzoni 2003                       | 600 mg  | w539 | Schizophrenia                                     | Parallel  | Unspecified method     | Double                                 | No                   | 58              | 60  |
| Dammann 1990                         | 600 mg  | w540 | Healthy volunteers                                | Crossover | Unspecified method     | Single                                 | Yes                  | 4               | 4   |
| Assuncao 2005                        | 600 mg  | w550 | Schizophrenia                                     | Parallel  | Unspecified method     | Double                                 | Yes                  | 27              | 27  |
| Cloud 1992 A                         | 600 mg  | w545 | Gastro-oesophageal reflux                         | Parallel  | Closed list            | Double                                 | Yes                  | 169             | 178 |
| Quik 1990                            | 600 mg  | w548 | Osteoarthritis                                    | Parallel  | Unspecified method     | Double                                 | No                   | 109             | 107 |
| <b>Other H2RA vs Control</b>         |         |      |                                                   |           |                        |                                        |                      |                 |     |
| Guerreiro 1991 X2                    | Unknown | w551 | Recently healed ulcers                            | Extension | Unspecified method     | Unknown                                | Yes                  | 61              | 76  |
| Murakami 2006                        | Unknown | w552 | Recently healed ulcers                            | Parallel  | Sealed envelopes       | Open                                   | Yes                  | 156             | 153 |
| Murakami 2006                        | Unknown | w552 | Recently healed ulcers                            | Parallel  | Sealed envelopes       | Open                                   | Yes                  | 158             | 153 |
| <b>Ranitidine vs Control</b>         |         |      |                                                   |           |                        |                                        |                      |                 |     |
| Vakil 2006                           | 75 mg   | w553 | Gastro-oesophageal reflux                         | Parallel  | Sealed envelopes       | Double                                 | No                   | 17              | 16  |
| Mignon 1990                          | 150 mg  | w554 | Recently healed ulcers                            | Parallel  | Closed list            | Double                                 | Yes                  | 197             | 202 |
| Andrade 1997                         | 150 mg  | w555 | Recently healed ulcers                            | Parallel  | Unspecified method     | Double                                 | Yes                  | 25              | 25  |
| Kang 1988                            | 150 mg  | w556 | Recently healed ulcers                            | Parallel  | Unspecified method     | Double                                 | Yes                  | 35              | 35  |
| Piai 1990                            | 150 mg  | w557 | Recently healed ulcers                            | Parallel  | Sealed envelopes       | Open                                   | Yes                  | 29              | 31  |
| Van Deventer 1989                    | 150 mg  | w558 | Recently healed ulcers                            | Parallel  | Unspecified method     | Double                                 | Yes                  | 70              | 70  |
| Kozarek 1985                         | 150 mg  | w559 | Recently healed ulcers                            | Parallel  | Unspecified method     | Double                                 | Yes                  | 138             | 139 |
| Alstead 1983 (healed gastric ulcer)  | 150 mg  | w560 | Recently healed ulcers                            | Parallel  | Unspecified method     | Double                                 | Yes                  | 15              | 16  |
| Koelz 1986                           | 150 mg  | w561 | Gastro-oesophageal reflux                         | Parallel  | Unspecified method     | Double                                 | Yes                  | 32              | 37  |
| Boyd 1984                            | 150 mg  | w562 | Recently healed ulcers                            | Parallel  | Unspecified method     | Double                                 | Yes                  | 21              | 26  |
| Di Mario 1982                        | 150 mg  | w563 | Recently healed ulcers                            | Parallel  | Unspecified method     | Open                                   | Yes                  | 31              | 30  |
| Dawson 1984 X2                       | 150 mg  | w564 | Recently healed ulcers                            | Extension | Unspecified method     | Double                                 | Yes                  | 24              | 24  |
| Goldin 1991                          | 150 mg  | w278 | Recently healed ulcers                            | Parallel  | Closed list            | Double                                 | Yes                  | 24              | 12  |
| GISU 1994                            | 150 mg  | w565 | Recently healed ulcers                            | Parallel  | Unspecified method     | Open                                   | Yes                  | 105             | 95  |
| Jensen 1994                          | 150 mg  | w566 | Recently healed ulcers                            | Parallel  | Unspecified method     | Double                                 | Yes                  | 32              | 33  |
| Blum 2000                            | 150 mg  | w104 | Gastro-oesophageal reflux                         | Parallel  | Unspecified method     | Double                                 | Yes                  | 194             | 203 |
| Hui 1992                             | 150 mg  | w373 | Recently healed ulcers                            | Parallel  | Unspecified method     | Single                                 | Yes                  | 100             | 103 |
| Monés 2001                           | 150 mg  | w567 | Recently healed ulcers                            | Parallel  | Unspecified method     | Double                                 | Yes                  | 36              | 37  |
| Murray 1987                          | 150 mg  | w568 | Recently healed ulcers                            | Parallel  | Unspecified method     | Double                                 | Yes                  | 20              | 20  |
| Mekel 1985                           | 150 mg  | w569 | Recently healed ulcers                            | Parallel  | Unspecified method     | Double                                 | Yes                  | 22              | 21  |
| Sue 1996                             | 150 mg  | w570 | Recently healed ulcers                            | Parallel  | Unspecified method     | Double                                 | Yes                  | 117             | 109 |
| Jorde 1987                           | 150 mg  | w571 | Recently healed ulcers                            | Parallel  | Unspecified method     | Double                                 | Yes                  | 25              | 25  |
| Ruszniewski 1993                     | 150 mg  | w572 | Recently healed ulcers                            | Parallel  | Unspecified method     | Double                                 | Yes                  | 197             | 202 |
| Manes 1998                           | 150 mg  | w573 | Recently healed ulcers                            | Parallel  | Unspecified method     | Open                                   | Yes                  | 33              | 33  |
| Zdrengea 2004                        | 150 mg  | w574 | Dyslipidaemia                                     | Parallel  | Unspecified method     | Unknown                                | No                   | 20              | 20  |
| Hovdenak 1987                        | 150 mg  | w575 | Recently healed ulcers                            | Parallel  | Unspecified method     | Double                                 | Yes                  | 29              | 30  |
| Russo 1997 X2                        | 150 mg  | w66  | Recently healed ulcers                            | Extension | Closed list            | Double                                 | Yes                  | 24              | 26  |
| Villalobos 1991                      | 150 mg  | w576 | Recently healed ulcers                            | Parallel  | Unspecified method     | Double                                 | Yes                  | 24              | 27  |
| Alstead 1983 (healed duodenal ulcer) | 150 mg  | w560 | Recently healed ulcers                            | Parallel  | Unspecified method     | Double                                 | Yes                  | 20              | 17  |
| Mehta 2014                           | 150 mg  | w577 | Schizophrenia                                     | Parallel  | Other method           | Unknown                                | No                   | 25              | 25  |
| Tamura 1991                          | 200 mg  | w578 | Varices                                           | Parallel  | Sealed envelopes       | Unknown                                | Yes                  | 18              | 17  |
| Penston 1993                         | 225 mg  | w579 | Recently healed ulcers                            | Parallel  | Unspecified method     | Double                                 | Yes                  | 46              | 46  |
| Ehsanullah 1988                      | 300 mg  | w580 | Arthritis, rheumatic or musculoskeletal disorders | Parallel  | Other method           | Double                                 | Yes                  | 151             | 146 |

**Webtable 3 (cont.): Details of trials involving a randomised comparison of a histamine-2 receptor antagonists (X) versus control (Y)**

| Trial name                   | Regimen | Ref. | Indication for treatment                          | Design    | Allocation Concealment | Blinding of investigators and patients | Availability of data | No. of patients |     |
|------------------------------|---------|------|---------------------------------------------------|-----------|------------------------|----------------------------------------|----------------------|-----------------|-----|
|                              |         |      |                                                   |           |                        |                                        |                      | NX              | NY  |
| Robinson 1989                | 300 mg  | w581 | Arthritis, rheumatic or musculoskeletal disorders | Parallel  | Unspecified method     | Double                                 | Yes                  | 72              | 72  |
| Van Groenendael 1996         | 300 mg  | w582 | Arthritis, rheumatic or musculoskeletal disorders | Parallel  | Closed list            | Double                                 | Yes                  | 47              | 47  |
| Robinson 1991 A              | 300 mg  | w583 | Arthritis, rheumatic or musculoskeletal disorders | Parallel  | Unspecified method     | Double                                 | Yes                  | 112             | 115 |
| Swift 1989                   | 300 mg  | w584 | Arthritis, rheumatic or musculoskeletal disorders | Crossover | Pharmacy               | Double                                 | Yes                  | 8               | 8   |
| Berkowitz 1987               | 300 mg  | w585 | Healthy volunteers                                | Parallel  | Unspecified method     | Double                                 | Yes                  | 25              | 25  |
| Nielsen 1998                 | 300 mg  | w586 | Colorectal cancer                                 | Parallel  | Unspecified method     | Double                                 | No                   | -               | -   |
| Müller 1997                  | 300 mg  | w58  | Healthy volunteers                                | Parallel  | Unspecified method     | Double                                 | No                   | 10              | 10  |
| Müller 1992 B                | 300 mg  | w587 | Healthy volunteers                                | Parallel  | Unspecified method     | Double                                 | No                   | 11              | 11  |
| Müller 1991                  | 300 mg  | w588 | Healthy volunteers                                | Crossover | Unspecified method     | Double                                 | No                   | 5               | 5   |
| Nervi 1989                   | 300 mg  | w589 | Gastro-oesophageal reflux                         | Parallel  | Unspecified method     | Unknown                                | No                   | 20              | 20  |
| Rush 1995                    | 300 mg  | w590 | Gastro-oesophageal reflux                         | Parallel  | Onsite computer        | Double                                 | Yes                  | 408             | 404 |
| Kar 1990                     | 300 mg  | w591 | Gastro-oesophageal reflux                         | Parallel  | Unspecified method     | Double                                 | No                   | 15              | 15  |
| Yanagawa 1991                | 300 mg  | w592 | Arthritis, rheumatic or musculoskeletal disorders | Parallel  | Sealed envelopes       | Unknown                                | Yes                  | 43              | 37  |
| Alberts 1991                 | 300 mg  | w593 | Cancer or palliative care (non gastrointestinal)  | Crossover | Unspecified method     | Double                                 | No                   | 4               | 3   |
| Yanagawa 1990                | 300 mg  | w594 | Arthritis, rheumatic or musculoskeletal disorders | Parallel  | Sealed envelopes       | Double                                 | Yes                  | 31              | 29  |
| Müller 1992 A                | 300 mg  | w595 | Healthy volunteers                                | Parallel  | Unspecified method     | Double                                 | No                   | 14              | 14  |
| Simon 1988                   | 300 mg  | w596 | Arthritis, rheumatic or musculoskeletal disorders | Parallel  | Unspecified method     | Double                                 | Yes                  | 23              | 23  |
| Primrose 1998                | 300 mg  | w597 | Gastric cancer                                    | Parallel  | Unspecified method     | Double                                 | Yes                  | 112             | 110 |
| Berenson 1987                | 300 mg  | w598 | Gastro-oesophageal reflux                         | Parallel  | Unspecified method     | Double                                 | Yes                  | 134             | 150 |
| Robinson 1987                | 300 mg  | w599 | Gastro-oesophageal reflux                         | Parallel  | Unspecified method     | Unknown                                | No                   | -               | -   |
| Saunders 1986                | 300 mg  | w600 | Gastro-oesophageal reflux                         | Parallel  | Pharmacy               | Double                                 | No                   | 243             | 253 |
| Hendel 1986                  | 300 mg  | w601 | Gastro-oesophageal reflux                         | Parallel  | Unspecified method     | Double                                 | No                   | 10              | 8   |
| Johansson 1986               | 300 mg  | w602 | Gastro-oesophageal reflux                         | Crossover | Unspecified method     | Double                                 | No                   | 20              | 22  |
| Müller 1994 C                | 300 mg  | w603 | Gastro-oesophageal reflux                         | Parallel  | Unspecified method     | Double                                 | No                   | 254             | 244 |
| Hegarty 1997                 | 300 mg  | w604 | Gastro-oesophageal reflux                         | Parallel  | Unspecified method     | Double                                 | No                   | 92              | 92  |
| Gustavsson 1987              | 300 mg  | w605 | Gastro-oesophageal reflux                         | Parallel  | Closed list            | Double                                 | No                   | 15              | 15  |
| Fullarton 1992               | 300 mg  | w606 | Hypergastrinaemia                                 | Crossover | Unspecified method     | Double                                 | No                   | 4               | 4   |
| Hallerback 1998 B            | 300 mg  | w607 | Gastro-oesophageal reflux                         | Parallel  | Unspecified method     | Double                                 | Yes                  | 210             | 213 |
| Orlowski 1986                | 300 mg  | w608 | Renal transplant                                  | Parallel  | Unspecified method     | Double                                 | Yes                  | 21              | 21  |
| Olubuyide 1986               | 300 mg  | w609 | Gastro-oesophageal reflux                         | Parallel  | Unspecified method     | Double                                 | No                   | 23              | 22  |
| Sherbaniuk 1984              | 300 mg  | w610 | Gastro-oesophageal reflux                         | Parallel  | Unspecified method     | Double                                 | No                   | 37              | 36  |
| Nielsen 1999                 | 300 mg  | w611 | Colorectal cancer                                 | Parallel  | Unspecified method     | Double                                 | Yes                  | 455             | 450 |
| Wotherspoon 1997             | 300 mg  | w612 | Gastric cancer                                    | Parallel  | Unspecified method     | Unknown                                | Yes                  | 79              | 80  |
| Tan 1996                     | 300 mg  | w613 | End stage renal disease                           | Crossover | Unspecified method     | Double                                 | Yes                  | 6               | 9   |
| Sartori 2000                 | 300 mg  | w131 | Cancer or palliative care (non gastrointestinal)  | Parallel  | Unspecified method     | Unknown                                | Yes                  | 77              | 75  |
| Smith 1999                   | 300 mg  | w614 | Healthy volunteers                                | Parallel  | Unspecified method     | Double                                 | No                   | 17              | 14  |
| Singh 1999                   | 300 mg  | w615 | Post-operative                                    | Parallel  | Sealed envelopes       | Unknown                                | No                   | 90              | 84  |
| Goy 1983                     | 300 mg  | w616 | Gastro-oesophageal reflux                         | Parallel  | Closed list            | Double                                 | No                   | 18              | 19  |
| Wallace 2001                 | 300 mg  | w617 | Familial adenomatous polyposis                    | Parallel  | Closed list            | Double                                 | Yes                  | 13              | 13  |
| Czapla 1992                  | 300 mg  | w618 | End stage renal disease                           | Crossover | Unspecified method     | Double                                 | Yes                  | 7               | 8   |
| Hadi 1989                    | 300 mg  | w619 | Gastritis or duodenitis                           | Parallel  | Unspecified method     | Double                                 | Yes                  | 26              | 26  |
| Farup 1997                   | 300 mg  | w620 | Gastro-oesophageal reflux                         | Parallel  | Unspecified method     | Double                                 | No                   | 103             | 103 |
| Wesdorp 1983                 | 300 mg  | w621 | Gastro-oesophageal reflux                         | Parallel  | Unspecified method     | Double                                 | No                   | 19              | 17  |
| Müller 1989                  | 300 mg  | w622 | Healthy volunteers                                | Parallel  | Unspecified method     | Double                                 | No                   | 10              | 10  |
| Müller 1998                  | 300 mg  | w190 | Healthy volunteers                                | Parallel  | Unspecified method     | Double                                 | Yes                  | 16              | 8   |
| Simon 1992                   | 300 mg  | w623 | Healthy volunteers                                | Crossover | Unspecified method     | Double                                 | Yes                  | 3               | 3   |
| Elizalde 1983 (oesophagitis) | 300 mg  | w624 | Gastro-oesophageal reflux                         | Parallel  | Unspecified method     | Double                                 | No                   | -               | -   |
| Metzenroth 1991              | 300 mg  | w625 | Hip replacement                                   | Parallel  | Unspecified method     | Unknown                                | No                   | 20              | 20  |

**Webtable 3 (cont.): Details of trials involving a randomised comparison of a histamine-2 receptor antagonists (X) versus control (Y)**

| Trial name                                            | Regimen | Ref. | Indication for treatment                          | Design    | Allocation Concealment | Blinding of investigators and patients | Availability of data | No. of patients |     |
|-------------------------------------------------------|---------|------|---------------------------------------------------|-----------|------------------------|----------------------------------------|----------------------|-----------------|-----|
|                                                       |         |      |                                                   |           |                        |                                        |                      | NX              | NY  |
| Richter 2000 C                                        | 300 mg  | w67  | Gastro-oesophageal reflux                         | Parallel  | Unspecified method     | Double                                 | No                   | 283             | 70  |
| Rovner 2003                                           | 300 mg  | w626 | Weight loss                                       | Parallel  | Unspecified method     | Open                                   | No                   | 28              | 29  |
| Zonneveld 1997                                        | 300 mg  | w627 | Psoriasis                                         | Parallel  | Unspecified method     | Double                                 | No                   | -               | -   |
| Grove 1985                                            | 300 mg  | w628 | Gastro-oesophageal reflux                         | Crossover | Unspecified method     | Double                                 | No                   | 28              | 28  |
| Corinaldesi 1991                                      | 300 mg  | w629 | Dental                                            | Parallel  | Unspecified method     | Double                                 | Yes                  | 23              | 25  |
| Hine 1984                                             | 300 mg  | w630 | Gastro-oesophageal reflux                         | Parallel  | Unspecified method     | Double                                 | No                   | 21              | 25  |
| Ideo 1988                                             | 300 mg  | w631 | Varices                                           | Parallel  | Closed list            | Single                                 | Yes                  | 22              | 27  |
| Farup 1992                                            | 300 mg  | w632 | Oesophageal stricture                             | Parallel  | Unspecified method     | Double                                 | Yes                  | 37              | 34  |
| Mehta 2014                                            | 300 mg  | w577 | Schizophrenia                                     | Parallel  | Other method           | Unknown                                | No                   | 25              | 25  |
| Lehtola 1986                                          | 450 mg  | w633 | Gastro-oesophageal reflux                         | Parallel  | Unspecified method     | Double                                 | No                   | 21              | 20  |
| Wilder-Smith 1990 B                                   | 525 mg  | w634 | Healthy volunteers                                | Crossover | Unspecified method     | Double                                 | No                   | 6               | 6   |
| ten Wolde 1996                                        | 600 mg  | w635 | Rheumatoid arthritis                              | Parallel  | Closed list            | Double                                 | Yes                  | 15              | 15  |
| Swift 1989                                            | 600 mg  | w584 | Arthritis, rheumatic or musculoskeletal disorders | Crossover | Pharmacy               | Double                                 | Yes                  | 8               | 8   |
| Müller 1992 B                                         | 600 mg  | w587 | Healthy volunteers                                | Parallel  | Unspecified method     | Double                                 | No                   | 9               | 11  |
| King 2002                                             | 600 mg  | w636 | Colorectal cancer                                 | Parallel  | Unspecified method     | Double                                 | Yes                  | 60              | 57  |
| Veien 1995                                            | 600 mg  | w637 | Eczema                                            | Parallel  | Unspecified method     | Double                                 | No                   | 23              | 24  |
| Euler 1993 B                                          | 600 mg  | w638 | Gastro-oesophageal reflux                         | Parallel  | Unspecified method     | Double                                 | No                   | 106             | 116 |
| Hegarty 1997                                          | 600 mg  | w604 | Gastro-oesophageal reflux                         | Parallel  | Unspecified method     | Double                                 | No                   | 95              | 92  |
| Cetin 1997                                            | 600 mg  | w639 | Psoriasis                                         | Parallel  | Unspecified method     | Double                                 | No                   | 25              | 25  |
| Jurlander 1995                                        | 600 mg  | w640 | Leukaemia                                         | Parallel  | Unspecified method     | Open                                   | No                   | 15              | 16  |
| Nielson 1991                                          | 600 mg  | w641 | HIV                                               | Parallel  | Unspecified method     | Double                                 | Yes                  | 9               | 9   |
| Nielsen 1990                                          | 600 mg  | w642 | Multiple myeloma                                  | Parallel  | Unspecified method     | Double                                 | No                   | 10              | 10  |
| Roufail 1992                                          | 600 mg  | w643 | Gastro-oesophageal reflux                         | Parallel  | Unspecified method     | Double                                 | No                   | 109             | 113 |
| Silver 1996                                           | 600 mg  | w644 | Gastro-oesophageal reflux                         | Parallel  | Unspecified method     | Double                                 | No                   | 261             | 251 |
| Silver 1996                                           | 600 mg  | w644 | Gastro-oesophageal reflux                         | Parallel  | Unspecified method     | Double                                 | No                   | 260             | 251 |
| Bartlett 1998                                         | 600 mg  | w645 | HIV                                               | Parallel  | Unspecified method     | Double                                 | Yes                  | 38              | 43  |
| Vendelbo Johansen 1997                                | 600 mg  | w646 | Infectious mononucleosis                          | Parallel  | Unspecified method     | Double                                 | No                   | 50              | 41  |
| Tefera 1996 (healed duodenal ulcer+ metronizadole)    | 600 mg  | w647 | Gastritis or duodenitis                           | Parallel  | Closed list            | Double                                 | No                   | 9               | 15  |
| Tefera 1996 (healed duodenal ulcer+ no metronizadole) | 600 mg  | w647 | Gastritis or duodenitis                           | Parallel  | Closed list            | Double                                 | No                   | 11              | 6   |
| Simon 1992                                            | 600 mg  | w623 | Healthy volunteers                                | Crossover | Unspecified method     | Double                                 | Yes                  | 3               | 3   |
| Rovner 2003                                           | 600 mg  | w626 | Weight loss                                       | Parallel  | Unspecified method     | Open                                   | No                   | 28              | 29  |
| Zonneveld 1997                                        | 600 mg  | w627 | Psoriasis                                         | Parallel  | Unspecified method     | Double                                 | No                   | -               | -   |
| Houben 1995                                           | 600 mg  | w141 | Healthy volunteers                                | Crossover | Unspecified method     | Double                                 | No                   | 3               | 3   |
| Ranjbar 2013                                          | 600 mg  | w648 | Schizophrenia                                     | Parallel  | Unspecified method     | Double                                 | No                   | 25              | 27  |
| Wilder-Smith 1990 C                                   | 900 mg  | w634 | Healthy volunteers                                | Crossover | Unspecified method     | Double                                 | No                   | 7               | 7   |
| Euler 1993 B                                          | 1200 mg | w638 | Gastro-oesophageal reflux                         | Parallel  | Unspecified method     | Double                                 | No                   | 106             | 116 |
| Roufail 1992                                          | 1200 mg | w643 | Gastro-oesophageal reflux                         | Parallel  | Unspecified method     | Double                                 | No                   | 120             | 113 |
| Chen ZQ 2010                                          | Unknown | w649 | Dual antiplatelet therapy                         | Parallel  | Unspecified method     | Unknown                                | Yes                  | 100             | 100 |
| <b>Ramixotidine vs Control</b>                        |         |      |                                                   |           |                        |                                        |                      |                 |     |
| Colle 1988                                            | 750 mg  | w446 | Healthy volunteers                                | Parallel  | Closed list            | Double                                 | No                   | 8               | 8   |
| <b>Roxatidine vs Control</b>                          |         |      |                                                   |           |                        |                                        |                      |                 |     |
| Simon 1991                                            | 75 mg   | w650 | Healthy volunteers                                | Parallel  | Unspecified method     | Double                                 | No                   | 10              | 10  |
| European Cooperative Roxatidine (duodenal ulcer)      | 75 mg   | w651 | Recently healed ulcers                            | Parallel  | Unspecified method     | Double                                 | Yes                  | 211             | 209 |
| European Cooperative Roxatidine (gastric ulcer)       | 75 mg   | w651 | Recently healed ulcers                            | Parallel  | Unspecified method     | Double                                 | Yes                  | 153             | 152 |
| Damman 1995                                           | 75 mg   | w652 | Healthy volunteers                                | Crossover | Unspecified method     | Single                                 | No                   | 4               | 4   |
| Müller 1994 A                                         | 150 mg  | w653 | Healthy volunteers                                | Crossover | Unspecified method     | Double                                 | Yes                  | 10              | 10  |
| Lassman 1988                                          | 150 mg  | w654 | Healthy volunteers                                | Parallel  | Unspecified method     | Double                                 | No                   | 10              | 4   |
| Damman 1995                                           | 150 mg  | w652 | Healthy volunteers                                | Crossover | Unspecified method     | Single                                 | No                   | 4               | 4   |



**Webtable 3 (cont.): Details of trials involving a randomised comparison of a histamine-2 receptor antagonists (X) versus control (Y)**

| Trial name                             | Regimen | Ref. | Indication for treatment | Design    | Allocation Concealment | Blinding of investigators and patients | Availability of data | No. of patients |     |
|----------------------------------------|---------|------|--------------------------|-----------|------------------------|----------------------------------------|----------------------|-----------------|-----|
|                                        |         |      |                          |           |                        |                                        |                      | NX              | NY  |
| <b>Healing Trials</b>                  |         |      |                          |           |                        |                                        |                      |                 |     |
| <i>Cimetidine vs Control</i>           |         |      |                          |           |                        |                                        |                      |                 |     |
| Braverman 1986                         | 400 mg  | w655 | Peptic ulcers            | Parallel  | Unspecified method     | Double                                 | Yes                  | 182             | 168 |
| Young 1989 A                           | 400 mg  | w656 | Peptic ulcers            | Parallel  | Unspecified method     | Double                                 | Yes                  | 182             | 168 |
| Gray 1978 (incompletely healed ulcers) | 400 mg  | w414 | Peptic ulcers            | Parallel  | Unspecified method     | Double                                 | Yes                  | 3               | 3   |
| Domschke 1976                          | 800 mg  | w657 | Peptic ulcers            | Parallel  | Unspecified method     | Double                                 | No                   | -               | -   |
| Frank 1989 B                           | 800 mg  | w658 | Peptic ulcers            | Parallel  | Pharmacy               | Double                                 | Yes                  | 83              | 80  |
| Braverman 1986                         | 800 mg  | w655 | Peptic ulcers            | Parallel  | Unspecified method     | Double                                 | Yes                  | 165             | 168 |
| Bodemar 1976                           | 800 mg  | w659 | Peptic ulcers            | Parallel  | Unspecified method     | Double                                 | No                   | 15              | 15  |
| Frank 1989 A                           | 800 mg  | w660 | Peptic ulcers            | Parallel  | Unspecified method     | Double                                 | Yes                  | 92              | 94  |
| Bodemar 1979 B                         | 800 mg  | w442 | Peptic ulcers            | Parallel  | Unspecified method     | Double                                 | Yes                  | 15              | 14  |
| Mosci 1989                             | 800 mg  | w661 | Peptic ulcers            | Parallel  | Unspecified method     | Double                                 | Yes                  | 26              | 26  |
| Tay 1988                               | 800 mg  | w662 | Peptic ulcers            | Parallel  | Other method           | Double                                 | Yes                  | 17              | 15  |
| Young 1989 A                           | 800 mg  | w656 | Peptic ulcers            | Parallel  | Unspecified method     | Double                                 | Yes                  | 165             | 168 |
| Moshal 1977                            | 800 mg  | w663 | Peptic ulcers            | Parallel  | Unspecified method     | Double                                 | Yes                  | 19              | 19  |
| Hoffenberg 1985                        | 800 mg  | w664 | Peptic ulcers            | Parallel  | Pharmacy               | Double                                 | Yes                  | 24              | 22  |
| Isenberg 1982                          | 900 mg  | w665 | Peptic ulcers            | Parallel  | Unspecified method     | Double                                 | No                   | 35              | 31  |
| Hentschel 1979                         | 1000 mg | w666 | Peptic ulcers            | Parallel  | Unspecified method     | Double                                 | Yes                  | 32              | 31  |
| Garbøl 1979                            | 1000 mg | w667 | Peptic ulcers            | Parallel  | Closed list            | Double                                 | Yes                  | 23              | 25  |
| Tárnok 1980                            | 1000 mg | w668 | Peptic ulcers            | Parallel  | Unspecified method     | Unknown                                | Yes                  | 22              | 20  |
| Sonnenberg 1979 X1                     | 1000 mg | w379 | Peptic ulcers            | Extension | Unspecified method     | Double                                 | Yes                  | 31              | 32  |
| Peter 1978                             | 1000 mg | w669 | Peptic ulcers            | Parallel  | Unspecified method     | Double                                 | Yes                  | 38              | 40  |
| Fica 1987                              | 1000 mg | w670 | Peptic ulcers            | Parallel  | Unspecified method     | Unknown                                | Yes                  | 20              | 20  |
| Bongiorno 1983                         | 1000 mg | w671 | Peptic ulcers            | Parallel  | Unspecified method     | Double                                 | Yes                  | 30              | 30  |
| Marini 1980                            | 1000 mg | w672 | Peptic ulcers            | Parallel  | Pharmacy               | Double                                 | Yes                  | 18              | 18  |
| Mazure 1980                            | 1000 mg | w673 | Peptic ulcers            | Parallel  | Unspecified method     | Double                                 | Yes                  | 20              | 20  |
| Lam 1983                               | 1000 mg | w674 | Peptic ulcers            | Parallel  | Unspecified method     | Open                                   | Yes                  | 40              | 20  |
| Eichenberger 1982 X1                   | 1000 mg | w388 | Peptic ulcers            | Extension | Unspecified method     | Double                                 | Yes                  | 23              | 23  |
| Dobrilla 1980                          | 1000 mg | w675 | Peptic ulcers            | Parallel  | Unspecified method     | Double                                 | Yes                  | 17              | 15  |
| Danielsson 1980 X1                     | 1000 mg | w676 | Peptic ulcers            | Parallel  | Unspecified method     | Double                                 | Yes                  | 25              | 25  |
| Ström 1981                             | 1000 mg | w677 | Peptic ulcers            | Parallel  | Unspecified method     | Double                                 | Yes                  | 24              | 24  |
| Corinaldesi 1980                       | 1000 mg | w678 | Peptic ulcers            | Parallel  | Unspecified method     | Unknown                                | No                   | 12              | 12  |
| Johannessen 1986                       | 1000 mg | w679 | Peptic ulcers            | Parallel  | Unspecified method     | Double                                 | Yes                  | 24              | 24  |
| Barakat 1984 A                         | 1000 mg | w359 | Peptic ulcers            | Parallel  | Unspecified method     | Double                                 | Yes                  | 40              | 39  |
| Dawson 1984 X1                         | 1000 mg | w564 | Peptic ulcers            | Extension | Unspecified method     | Single                                 | Yes                  | 20              | 20  |
| Frost 1977 X1                          | 1000 mg | w680 | Peptic ulcers            | Extension | Unspecified method     | Double                                 | Yes                  | 27              | 24  |
| Giger 1979                             | 1000 mg | w681 | Peptic ulcers            | Parallel  | Unspecified method     | Double                                 | Yes                  | 16              | 18  |
| Ciclitira 1977                         | 1000 mg | w682 | Peptic ulcers            | Parallel  | Unspecified method     | Double                                 | Yes                  | 35              | 27  |
| Bianchi Porro 1982                     | 1000 mg | w683 | Peptic ulcers            | Parallel  | Pharmacy               | Double                                 | Yes                  | 30              | 30  |
| Buligescu 1985                         | 1000 mg | w684 | Peptic ulcers            | Parallel  | Unspecified method     | Double                                 | Yes                  | 20              | 20  |
| Gotthard 1982 (prepyloric ulcer)       | 1000 mg | w685 | Peptic ulcers            | Parallel  | Unspecified method     | Double                                 | Yes                  | 12              | 12  |
| Gray 1977                              | 1000 mg | w686 | Peptic ulcers            | Parallel  | Unspecified method     | Double                                 | Yes                  | 20              | 20  |
| Gotthard 1982 (duodenal ulcer)         | 1000 mg | w685 | Peptic ulcers            | Parallel  | Unspecified method     | Double                                 | Yes                  | 18              | 18  |
| Grewal 1979                            | 1000 mg | w687 | Peptic ulcers            | Parallel  | Unspecified method     | Double                                 | Yes                  | 25              | 25  |
| Marini 1981                            | 1000 mg | w688 | Peptic ulcers            | Parallel  | Unspecified method     | Double                                 | Yes                  | 10              | 10  |
| Gotlieb-Jensen 1983                    | 1000 mg | w689 | Peptic ulcers            | Parallel  | Unspecified method     | Double                                 | Yes                  | 21              | 21  |
| Kennedy 1978                           | 1000 mg | w690 | Peptic ulcers            | Parallel  | Unspecified method     | Double                                 | Yes                  | 12              | 12  |
| Giacosa 1982                           | 1000 mg | w691 | Peptic ulcers            | Parallel  | Unspecified method     | Open                                   | Yes                  | 30              | 29  |
| Monnis 1988                            | 1000 mg | w692 | Peptic ulcers            | Parallel  | Unspecified method     | Double                                 | Yes                  | 12              | 11  |
| Mukhtar 1982                           | 1000 mg | w693 | Peptic ulcers            | Parallel  | Unspecified method     | Double                                 | Yes                  | 19              | 19  |
| Guha Mazumdar 1981                     | 1000 mg | w694 | Peptic ulcers            | Parallel  | Unspecified method     | Double                                 | No                   | 24              | 26  |
| Popoola 1978 (duodenal ulcer)          | 1000 mg | w474 | Peptic ulcers            | Parallel  | Unspecified method     | Double                                 | Yes                  | 12              | 9   |

**Webtable 3 (cont.): Details of trials involving a randomised comparison of a histamine-2 receptor antagonists (X) versus control (Y)**

| Trial name                             | Regimen | Ref. | Indication for treatment | Design    | Allocation Concealment | Blinding of investigators and patients | Availability of data | No. of patients |     |
|----------------------------------------|---------|------|--------------------------|-----------|------------------------|----------------------------------------|----------------------|-----------------|-----|
|                                        |         |      |                          |           |                        |                                        |                      | NX              | NY  |
| Sonnenberg 1981 X1                     | 1000 mg | w403 | Peptic ulcers            | Extension | Closed list            | Double                                 | Yes                  | 59              | 62  |
| Manousos 1978 (gastric ulcer)          | 1000 mg | w695 | Peptic ulcers            | Parallel  | Unspecified method     | Double                                 | Yes                  | 9               | 9   |
| Falaiye 1979                           | 1000 mg | w696 | Peptic ulcers            | Parallel  | Unspecified method     | Double                                 | Yes                  | 16              | 11  |
| Vantini 1978                           | 1000 mg | w697 | Peptic ulcers            | Parallel  | Unspecified method     | Double                                 | Yes                  | 21              | 18  |
| Tytgat 1982                            | 1000 mg | w698 | Peptic ulcers            | Parallel  | Other method           | Double                                 | Yes                  | 30              | 24  |
| Chen 1979                              | 1000 mg | w699 | Peptic ulcers            | Parallel  | Unspecified method     | Double                                 | Yes                  | 46              | 40  |
| Zespolowa 1980 (gastric ulcer)         | 1000 mg | w700 | Peptic ulcers            | Parallel  | Pharmacy               | Double                                 | Yes                  | 36              | 44  |
| Villalobos 1978                        | 1000 mg | w701 | Peptic ulcers            | Parallel  | Unspecified method     | Double                                 | Yes                  | 24              | 21  |
| Bardhan 1979 (duodenal ulcer)          | 1000 mg | w702 | Peptic ulcers            | Parallel  | Unspecified method     | Double                                 | Yes                  | 78              | 50  |
| Patty 1988                             | 1000 mg | w703 | Peptic ulcers            | Parallel  | Unspecified method     | Double                                 | Yes                  | 18              | 19  |
| Chen 1980 A                            | 1000 mg | w704 | Peptic ulcers            | Parallel  | Unspecified method     | Double                                 | Yes                  | 25              | 25  |
| Jensen 1979                            | 1000 mg | w705 | Peptic ulcers            | Parallel  | Unspecified method     | Double                                 | Yes                  | 24              | 26  |
| Manousos 1978 (duodenal ulcer)         | 1000 mg | w695 | Peptic ulcers            | Parallel  | Unspecified method     | Double                                 | Yes                  | 13              | 9   |
| Gudmand-Höyer 1977                     | 1000 mg | w706 | Peptic ulcers            | Parallel  | Unspecified method     | Unknown                                | Yes                  | 30              | 30  |
| Villalobos 1979                        | 1000 mg | w707 | Peptic ulcers            | Parallel  | Unspecified method     | Double                                 | Yes                  | 10              | 10  |
| Alcala-Santaella 1980 (gastric ulcer)  | 1000 mg | w708 | Peptic ulcers            | Parallel  | Unspecified method     | Double                                 | Yes                  | 8               | 6   |
| Alcala-Santaella 1980 (duodenal ulcer) | 1000 mg | w708 | Peptic ulcers            | Parallel  | Unspecified method     | Double                                 | Yes                  | 12              | 14  |
| Guelrud 1978                           | 1000 mg | w709 | Peptic ulcers            | Parallel  | Unspecified method     | Double                                 | Yes                  | 30              | 30  |
| Matos-Villalobos 1979                  | 1000 mg | w710 | Peptic ulcers            | Parallel  | Unspecified method     | Double                                 | Yes                  | 15              | 15  |
| Gugler 1979                            | 1000 mg | w711 | Anastomotic ulcers       | Parallel  | Unspecified method     | Double                                 | Yes                  | 7               | 8   |
| Festen 1979                            | 1000 mg | w712 | Anastomotic ulcers       | Parallel  | Unspecified method     | Double                                 | Yes                  | 12              | 9   |
| Zespolowa 1980 (duodenal ulcer)        | 1000 mg | w700 | Peptic ulcers            | Parallel  | Pharmacy               | Double                                 | Yes                  | 66              | 63  |
| O'Laughlin 1982                        | 1200 mg | w713 | Peptic ulcers            | Parallel  | Unspecified method     | Double                                 | Yes                  | 9               | 9   |
| Graham 1985                            | 1200 mg | w714 | Peptic ulcers            | Parallel  | Unspecified method     | Unknown                                | Yes                  | 87              | 85  |
| Akdamar 1981                           | 1200 mg | w715 | Peptic ulcers            | Parallel  | Unspecified method     | Unknown                                | Yes                  | 65              | 67  |
| Bodemar 1976                           | 1200 mg | w659 | Peptic ulcers            | Parallel  | Unspecified method     | Double                                 | No                   | 15              | 15  |
| Binder 1978 A                          | 1200 mg | w716 | Peptic ulcers            | Parallel  | Unspecified method     | Double                                 | Yes                  | 45              | 53  |
| Binder 1978 B                          | 1200 mg | w716 | Peptic ulcers            | Parallel  | Unspecified method     | Double                                 | Yes                  | 30              | 30  |
| Binder 1978 C                          | 1200 mg | w716 | Peptic ulcers            | Parallel  | Unspecified method     | Double                                 | Yes                  | 41              | 37  |
| Binder 1978 D                          | 1200 mg | w716 | Peptic ulcers            | Parallel  | Unspecified method     | Double                                 | Yes                  | 36              | 36  |
| Barbezat 1978                          | 1200 mg | w717 | Peptic ulcers            | Parallel  | Unspecified method     | Double                                 | No                   | 6               | 7   |
| Bank 1976                              | 1200 mg | w718 | Peptic ulcers            | Parallel  | Unspecified method     | Double                                 | Yes                  | 8               | 19  |
| Döller 1978                            | 1200 mg | w719 | Peptic ulcers            | Parallel  | Unspecified method     | Double                                 | Yes                  | 33              | 34  |
| Collen 1980 B                          | 1200 mg | w720 | Peptic ulcers            | Parallel  | Sealed envelopes       | Double                                 | Yes                  | 11              | 12  |
| Clarke 1980                            | 1200 mg | w721 | Peptic ulcers            | Parallel  | Unspecified method     | Double                                 | Yes                  | 15              | 15  |
| Van Deventer 1985                      | 1200 mg | w722 | Peptic ulcers            | Parallel  | Pharmacy               | Double                                 | No                   | 21              | 20  |
| Bodemar 1979 B                         | 1200 mg | w442 | Peptic ulcers            | Parallel  | Unspecified method     | Double                                 | Yes                  | 15              | 14  |
| Hetzel 1978 A                          | 1200 mg | w443 | Peptic ulcers            | Parallel  | Unspecified method     | Double                                 | Yes                  | 43              | 42  |
| Khanna 1989                            | 1200 mg | w723 | Peptic ulcers            | Parallel  | Unspecified method     | Double                                 | Yes                  | 20              | 20  |
| Collen 1980 A                          | 1200 mg | w724 | Peptic ulcers            | Parallel  | Sealed envelopes       | Double                                 | Yes                  | 12              | 15  |
| Englert 1978                           | 1200 mg | w725 | Peptic ulcers            | Parallel  | Other method           | Double                                 | Yes                  | 60              | 62  |
| Dyck 1978                              | 1200 mg | w726 | Peptic ulcers            | Parallel  | Unspecified method     | Double                                 | Yes                  | 31              | 32  |
| Loludice 1981                          | 1200 mg | w727 | Peptic ulcers            | Parallel  | Unspecified method     | Unknown                                | Yes                  | 38              | 32  |
| Moshal 1977                            | 1200 mg | w663 | Peptic ulcers            | Parallel  | Unspecified method     | Double                                 | Yes                  | 17              | 19  |
| Gaon 1981                              | 1200 mg | w728 | Peptic ulcers            | Parallel  | Unspecified method     | Unknown                                | No                   | 10              | 10  |
| Isenberg 1983                          | 1200 mg | w729 | Peptic ulcers            | Parallel  | Other method           | Double                                 | Yes                  | 45              | 46  |
| Landecker 1979                         | 1200 mg | w730 | Peptic ulcers            | Parallel  | Unspecified method     | Double                                 | Yes                  | 25              | 23  |
| Sewing 1978                            | 1200 mg | w731 | Peptic ulcers            | Parallel  | Unspecified method     | Double                                 | Yes                  | 20              | 20  |
| Braverman 1986                         | 1600 mg | w655 | Peptic ulcers            | Parallel  | Unspecified method     | Double                                 | Yes                  | 188             | 168 |
| Barbezat 1978                          | 1600 mg | w717 | Peptic ulcers            | Parallel  | Unspecified method     | Double                                 | No                   | 10              | 7   |
| Bank 1976                              | 1600 mg | w718 | Peptic ulcers            | Parallel  | Unspecified method     | Double                                 | Yes                  | 11              | 19  |

**Webtable 3 (cont.): Details of trials involving a randomised comparison of a histamine-2 receptor antagonists (X) versus control (Y)**

| Trial name                                      | Regimen | Ref. | Indication for treatment | Design    | Allocation Concealment | Blinding of investigators and patients | Availability of data | No. of patients |     |
|-------------------------------------------------|---------|------|--------------------------|-----------|------------------------|----------------------------------------|----------------------|-----------------|-----|
|                                                 |         |      |                          |           |                        |                                        |                      | NX              | NY  |
| Davies 1986 (gastric ulcer)                     | 1600 mg | w732 | Peptic ulcers            | Parallel  | Unspecified method     | Double                                 | Yes                  | 11              | 10  |
| Blackwood 1976                                  | 1600 mg | w733 | Peptic ulcers            | Parallel  | Unspecified method     | Double                                 | No                   | -               | -   |
| Young 1989 A                                    | 1600 mg | w656 | Peptic ulcers            | Parallel  | Unspecified method     | Double                                 | Yes                  | 188             | 168 |
| Davies 1986 (duodenal ulcer)                    | 1600 mg | w732 | Peptic ulcers            | Parallel  | Unspecified method     | Double                                 | Yes                  | 3               | 3   |
| Bardhan 1979 (duodenal ulcer)                   | 2000 mg | w702 | Peptic ulcers            | Parallel  | Unspecified method     | Double                                 | Yes                  | 72              | 50  |
| Machado 1978                                    | Unknown | w734 | Peptic ulcers            | Parallel  | Unspecified method     | Double                                 | Yes                  | 18              | 17  |
| <b>Famotidine vs Control</b>                    |         |      |                          |           |                        |                                        |                      |                 |     |
| Simon 1987 B                                    | 40 mg   | w735 | Peptic ulcers            | Parallel  | Unspecified method     | Double                                 | Yes                  | 149             | 145 |
| Dammann 1985 A                                  | 40 mg   | w736 | Peptic ulcers            | Parallel  | Unspecified method     | Double                                 | Yes                  | 34              | 39  |
| McCullough 1989                                 | 40 mg   | w737 | Peptic ulcers            | Parallel  | Unspecified method     | Double                                 | Yes                  | 79              | 78  |
| Dammann 1987 B                                  | 40 mg   | w738 | Peptic ulcers            | Parallel  | Other method           | Double                                 | Yes                  | 167             | 169 |
| Gitlin 1987                                     | 40 mg   | w739 | Peptic ulcers            | Parallel  | Telephone              | Double                                 | Yes                  | 96              | 100 |
| Gitlin 1987                                     | 40 mg   | w739 | Peptic ulcers            | Parallel  | Telephone              | Double                                 | Yes                  | 89              | 100 |
| Dammann 1985 B                                  | 40 mg   | w740 | Peptic ulcers            | Parallel  | Unspecified method     | Double                                 | Yes                  | 71              | 73  |
| Gitlin 1987                                     | 80 mg   | w739 | Peptic ulcers            | Parallel  | Telephone              | Double                                 | Yes                  | 99              | 100 |
| <b>Nizatidine vs Control</b>                    |         |      |                          |           |                        |                                        |                      |                 |     |
| Dyck 1987 X1                                    | 50 mg   | w741 | Peptic ulcers            | Extension | Unspecified method     | Double                                 | Yes                  | 103             | 101 |
| Cloud 1989 A                                    | 100 mg  | w742 | Peptic ulcers            | Parallel  | Unspecified method     | Double                                 | Yes                  | 94              | 98  |
| Cloud 1992 B                                    | 300 mg  | w743 | Peptic ulcers            | Parallel  | Other method           | Double                                 | Yes                  | 153             | 152 |
| Cloud 1992 B                                    | 300 mg  | w743 | Peptic ulcers            | Parallel  | Other method           | Double                                 | Yes                  | 151             | 152 |
| Eliakim 1994                                    | 300 mg  | w744 | Peptic ulcers            | Parallel  | Unspecified method     | Double                                 | Yes                  | 27              | 28  |
| Cloud 1989 A                                    | 300 mg  | w742 | Peptic ulcers            | Parallel  | Unspecified method     | Double                                 | Yes                  | 92              | 98  |
| Levendoglu 1986                                 | 300 mg  | w745 | Peptic ulcers            | Parallel  | Unspecified method     | Double                                 | Yes                  | 23              | 19  |
| Dyck 1987 X2                                    | 300 mg  | w741 | Peptic ulcers            | Extension | Unspecified method     | Double                                 | Yes                  | 84              | 82  |
| Dyck 1987 X1                                    | 300 mg  | w741 | Peptic ulcers            | Extension | Unspecified method     | Double                                 | Yes                  | 106             | 101 |
| Dyck 1987 X1                                    | 300 mg  | w741 | Peptic ulcers            | Extension | Unspecified method     | Double                                 | Yes                  | 108             | 101 |
| Cloud 1989 B X1                                 | 300 mg  | w549 | Peptic ulcers            | Extension | Unspecified method     | Double                                 | Yes                  | 276             | 279 |
| Cloud 1989 B X2                                 | 300 mg  | w549 | Peptic ulcers            | Extension | Unspecified method     | Double                                 | Yes                  | 28              | 26  |
| Cloud 1989 B X3                                 | 300 mg  | w549 | Peptic ulcers            | Extension | Unspecified method     | Double                                 | Yes                  | 66              | 72  |
| <b>Oxmetidine vs Control</b>                    |         |      |                          |           |                        |                                        |                      |                 |     |
| Lam 1985 B                                      | 600 mg  | w746 | Peptic ulcers            | Parallel  | Unspecified method     | Double                                 | Yes                  | 40              | 38  |
| <b>Ranitidine vs Control</b>                    |         |      |                          |           |                        |                                        |                      |                 |     |
| Forssell 1983 (gastric ulcer)                   | 200 mg  | w747 | Peptic ulcers            | Parallel  | Unspecified method     | Double                                 | No                   | 15              | 14  |
| Dobrilla 1981 A                                 | 200 mg  | w748 | Peptic ulcers            | Parallel  | Other method           | Double                                 | Yes                  | 20              | 20  |
| Forssell 1983 (duodenal ulcer)                  | 200 mg  | w747 | Peptic ulcers            | Parallel  | Unspecified method     | Double                                 | Yes                  | 9               | 10  |
| Berstad 1980                                    | 200 mg  | w749 | Peptic ulcers            | Parallel  | Unspecified method     | Double                                 | Yes                  | 25              | 25  |
| Darle 1984 B (gastric ulcer + prepyloric ulcer) | 200 mg  | w750 | Peptic ulcers            | Parallel  | Other method           | Double                                 | Yes                  | 9               | 13  |
| Darle 1984 B (duodenal ulcer)                   | 200 mg  | w751 | Peptic ulcers            | Parallel  | Other method           | Double                                 | Yes                  | 16              | 12  |
| Pan 1987                                        | 300 mg  | w752 | Peptic ulcers            | Parallel  | Unspecified method     | Double                                 | Yes                  | 27              | 28  |
| Martinez 1988                                   | 300 mg  | w753 | Peptic ulcers            | Parallel  | Unspecified method     | Double                                 | No                   | 10              | 10  |
| Fica 1987                                       | 300 mg  | w670 | Peptic ulcers            | Parallel  | Unspecified method     | Unknown                                | Yes                  | 20              | 20  |
| Schulz 1984                                     | 300 mg  | w754 | Peptic ulcers            | Parallel  | Unspecified method     | Double                                 | Yes                  | 25              | 20  |
| Hirschowitz 1986 A                              | 300 mg  | w755 | Peptic ulcers            | Parallel  | Unspecified method     | Double                                 | Yes                  | 103             | 103 |
| Marks 1982                                      | 300 mg  | w756 | Peptic ulcers            | Parallel  | Closed list            | Double                                 | Yes                  | 40              | 40  |
| Lee 1982                                        | 300 mg  | w757 | Peptic ulcers            | Parallel  | Closed list            | Double                                 | Yes                  | 62              | 67  |
| Hirschowitz 1986 B X1                           | 300 mg  | w758 | Peptic ulcers            | Extension | Unspecified method     | Double                                 | Yes                  | 195             | 187 |
| Hirschowitz 1986 B X2                           | 300 mg  | w758 | Peptic ulcers            | Extension | Unspecified method     | Double                                 | Yes                  | 57              | 67  |
| Guo-zong 1988                                   | 300 mg  | w759 | Peptic ulcers            | Parallel  | Unspecified method     | Double                                 | Yes                  | 10              | 13  |
| Hirschowitz 1983 X1                             | 300 mg  | w760 | Peptic ulcers            | Extension | Unspecified method     | Unknown                                | Yes                  | 195             | 187 |
| Hirschowitz 1983 X2                             | 300 mg  | w760 | Peptic ulcers            | Extension | Unspecified method     | Unknown                                | Yes                  | 58              | 66  |
| Chatterji 1980                                  | 300 mg  | w761 | Peptic ulcers            | Parallel  | Unspecified method     | Double                                 | Yes                  | 15              | 15  |
| Ashton 1982                                     | 300 mg  | w762 | Peptic ulcers            | Parallel  | Unspecified method     | Double                                 | Yes                  | 22              | 20  |

**Webtable 3 (cont.): Details of trials involving a randomised comparison of a histamine-2 receptor antagonists (X) versus control (Y)**

| Trial name                                 | Regimen | Ref. | Indication for treatment | Design    | Allocation Concealment | Blinding of investigators and patients | Availability of data | No. of patients |     |
|--------------------------------------------|---------|------|--------------------------|-----------|------------------------|----------------------------------------|----------------------|-----------------|-----|
|                                            |         |      |                          |           |                        |                                        |                      | NX              | NY  |
| Dobrilla 1981 B                            | 300 mg  | w763 | Peptic ulcers            | Parallel  | Unspecified method     | Double                                 | Yes                  | 63              | 59  |
| Dawson 1984 X1                             | 300 mg  | w564 | Peptic ulcers            | Extension | Unspecified method     | Single                                 | Yes                  | 18              | 20  |
| Gibinski 1982 (gastric ulcer)              | 300 mg  | w764 | Peptic ulcers            | Parallel  | Unspecified method     | Double                                 | Yes                  | 40              | 41  |
| Gibinski 1982 (duodenal ulcer)             | 300 mg  | w764 | Peptic ulcers            | Parallel  | Unspecified method     | Double                                 | Yes                  | 90              | 87  |
| Jhala 1995                                 | 300 mg  | w233 | Peptic ulcers            | Parallel  | Unspecified method     | Double                                 | Yes                  | 33              | 19  |
| Nair 1990                                  | 300 mg  | w765 | Peptic ulcers            | Parallel  | Unspecified method     | Double                                 | Yes                  | 28              | 32  |
| Nelis 1982                                 | 300 mg  | w766 | Peptic ulcers            | Parallel  | Other method           | Double                                 | Yes                  | 14              | 13  |
| Giacosa 1982                               | 300 mg  | w691 | Peptic ulcers            | Parallel  | Unspecified method     | Open                                   | Yes                  | 31              | 29  |
| Moshal 1981                                | 300 mg  | w767 | Peptic ulcers            | Parallel  | Unspecified method     | Double                                 | Yes                  | 25              | 25  |
| Murray 1986                                | 300 mg  | w768 | Peptic ulcers            | Parallel  | Unspecified method     | Double                                 | Yes                  | 20              | 20  |
| Pasquali 1981                              | 300 mg  | w769 | Peptic ulcers            | Parallel  | Unspecified method     | Double                                 | Yes                  | 15              | 15  |
| Johnson 1993                               | 300 mg  | w770 | Peptic ulcers            | Parallel  | Unspecified method     | Double                                 | Yes                  | 152             | 116 |
| Tildesley 1993 (gastric ulcer)             | 300 mg  | w771 | Peptic ulcers            | Parallel  | Other method           | Double                                 | Yes                  | 28              | 15  |
| Tildesley 1993 (duodenal ulcer)            | 300 mg  | w771 | Peptic ulcers            | Parallel  | Other method           | Double                                 | Yes                  | 36              | 12  |
| Korman 1982                                | 300 mg  | w772 | Peptic ulcers            | Parallel  | Unspecified method     | Double                                 | Yes                  | 25              | 25  |
| Makalinao 1984 (gastric ulcer)             | 300 mg  | w773 | Peptic ulcers            | Parallel  | Unspecified method     | Double                                 | Yes                  | 21              | 23  |
| Leroux 1983 (gastric ulcer)                | 300 mg  | w774 | Peptic ulcers            | Parallel  | Unspecified method     | Double                                 | Yes                  | 17              | 13  |
| Mach 1995 B                                | 300 mg  | w775 | Peptic ulcers            | Parallel  | Unspecified method     | Open                                   | Yes                  | 21              | 18  |
| Mach 1995 A                                | 300 mg  | w776 | Peptic ulcers            | Parallel  | Unspecified method     | Double                                 | Yes                  | 46              | 38  |
| Yap 1985                                   | 300 mg  | w777 | Peptic ulcers            | Parallel  | Other method           | Double                                 | Yes                  | 23              | 24  |
| Roberts 1982                               | 300 mg  | w778 | Peptic ulcers            | Parallel  | Unspecified method     | Double                                 | Yes                  | 39              | 41  |
| Mach 1992                                  | 300 mg  | w779 | Peptic ulcers            | Parallel  | Unspecified method     | Double                                 | Yes                  | 30              | 26  |
| Dupas 2000                                 | 300 mg  | w780 | Peptic ulcers            | Parallel  | Unspecified method     | Double                                 | Yes                  | 180             | 163 |
| Mach 1991                                  | 300 mg  | w781 | Peptic ulcers            | Unknown   | Unspecified method     | Unknown                                | No                   | 24              | 20  |
| Lanza 1994                                 | 300 mg  | w234 | Peptic ulcers            | Parallel  | Unspecified method     | Double                                 | Yes                  | 86              | 44  |
| Makalinao 1984 (duodenal ulcer)            | 300 mg  | w773 | Peptic ulcers            | Parallel  | Unspecified method     | Double                                 | Yes                  | 24              | 27  |
| Leroux 1983 (duodenal ulcer)               | 300 mg  | w774 | Peptic ulcers            | Parallel  | Unspecified method     | Double                                 | Yes                  | 20              | 21  |
| Elizalde 1983 (duodenal ulcer)             | 300 mg  | w624 | Peptic ulcers            | Parallel  | Unspecified method     | Double                                 | Yes                  | 20              | 15  |
| Elizalde 1983 (gastric and duodenal ulcer) | 300 mg  | w624 | Peptic ulcers            | Parallel  | Unspecified method     | Double                                 | Yes                  | 3               | 5   |
| Elizalde 1983 (gastric ulcer)              | 300 mg  | w624 | Peptic ulcers            | Parallel  | Unspecified method     | Double                                 | No                   | -               | -   |
| Robins 1984                                | 300 mg  | w782 | Peptic ulcers            | Parallel  | Unspecified method     | Double                                 | Yes                  | 25              | 28  |
| Sheers 1982                                | 400 mg  | w783 | Peptic ulcers            | Parallel  | Unspecified method     | Double                                 | Yes                  | 25              | 23  |
| Massarrat 1998                             | 600 mg  | w784 | Peptic ulcers            | Parallel  | Unspecified method     | Double                                 | Yes                  | 78              | 78  |
| Tefera 1996 (no metronizadole)             | 600 mg  | w647 | Peptic ulcers            | Parallel  | Closed list            | Double                                 | Yes                  | 34              | 39  |
| Tefera 1996 (metronizadole)                | 600 mg  | w647 | Peptic ulcers            | Parallel  | Closed list            | Double                                 | Yes                  | 36              | 30  |
| Lanza 1998                                 | 800 mg  | w785 | Peptic ulcers            | Parallel  | Unspecified method     | Double                                 | No                   | 115             | 89  |
| Trautman 1981                              | Unknown | w786 | Peptic ulcers            | Parallel  | Unspecified method     | Double                                 | No                   | -               | -   |
| Witzel 1981                                | Unknown | w787 | Peptic ulcers            | Parallel  | Unspecified method     | Double                                 | No                   | 25              | 25  |
| <b>Roxatidine vs Control</b>               |         |      |                          |           |                        |                                        |                      |                 |     |
| Gilinsky 1992                              | 150 mg  | w788 | Peptic ulcers            | Parallel  | Unspecified method     | Double                                 | Yes                  | 177             | 179 |

### Acute Bleeding Trials

#### Cimetidine vs Control

|                 |         |      |                           |           |                    |        |     |     |     |
|-----------------|---------|------|---------------------------|-----------|--------------------|--------|-----|-----|-----|
| Darle 1984 A    | 800 mg  | w789 | Bleeding Peptic Ulcer     | Parallel  | Unspecified method | Double | Yes | 33  | 39  |
| Siddiqi 1979    | 800 mg  | w790 | UGI bleeding of any cause | Parallel  | Unspecified method | Open   | Yes | 58  | 55  |
| Stiel 1984      | 800 mg  | w791 | Bleeding Peptic Ulcer     | Parallel  | Unspecified method | Double | Yes | 29  | 26  |
| Zuckerman 1984  | 900 mg  | w792 | UGI bleeding of any cause | Extension | Onsite computer    | Double | Yes | 153 | 132 |
| Terés 1980 X2   | 1000 mg | w793 | UGI bleeding of any cause | Extension | Unspecified method | Double | Yes | 20  | 20  |
| Carstensen 1980 | 1200 mg | w794 | Bleeding Peptic Ulcer     | Parallel  | Closed list        | Double | Yes | 40  | 48  |
| Hoare 1979      | 1200 mg | w795 | Bleeding Peptic Ulcer     | Parallel  | Closed list        | Double | Yes | 38  | 33  |
| Terés 1980 X1   | 1200 mg | w796 | UGI bleeding of any cause | Extension | Pharmacy           | Double | Yes | 20  | 20  |
| Olivero 1981    | 1200 mg | w797 | Bleeding Peptic Ulcer     | Parallel  | Unspecified method | Double | No  | 20  | 20  |

**Webtable 3 (cont.): Details of trials involving a randomised comparison of a histamine-2 receptor antagonists (X) versus control (Y)**

| Trial name                          | Regimen | Ref. | Indication for treatment  | Design   | Allocation Concealment | Blinding of investigators and patients | Availability of data | No. of patients |     |
|-------------------------------------|---------|------|---------------------------|----------|------------------------|----------------------------------------|----------------------|-----------------|-----|
|                                     |         |      |                           |          |                        |                                        |                      | NX              | NY  |
| Baltas 1984                         | 1200 mg | w798 | UGI bleeding of any cause | Parallel | Other method           | Double                                 | Yes                  | 36              | 36  |
| Kang 1977                           | 1200 mg | w799 | UGI bleeding of any cause | Parallel | Unspecified method     | Double                                 | Yes                  | 32              | 33  |
| Stadler 1985 (pirenzipine)          | 1200 mg | w800 | Bleeding Peptic Ulcer     | Parallel | Unspecified method     | Unknown                                | Yes                  | 18              | 20  |
| Barer 1983                          | 1600 mg | w801 | UGI bleeding of any cause | Parallel | Pharmacy               | Double                                 | Yes                  | 259             | 260 |
| Galmiche 1978                       | 1600 mg | w802 | Bleeding Peptic Ulcer     | Parallel | Unspecified method     | Double                                 | Yes                  | 24              | 24  |
| Birnie 1984                         | 1600 mg | w803 | UGI bleeding of any cause | Parallel | Unspecified method     | Double                                 | Yes                  | 106             | 107 |
| La Brooy 1979                       | 1600 mg | w804 | UGI bleeding of any cause | Parallel | Unspecified method     | Double                                 | Yes                  | 51              | 50  |
| <b><i>Famotidine vs Control</i></b> |         |      |                           |          |                        |                                        |                      |                 |     |
| Fullarton 1991 B                    | 70.4 mg | w805 | Bleeding Peptic Ulcer     | Parallel | Unspecified method     | Double                                 | Yes                  | 10              | 10  |
| Walt 1992                           | 76.8 mg | w806 | Bleeding Peptic Ulcer     | Parallel | Other method           | Double                                 | Yes                  | 497             | 508 |
| <b><i>Ranitidine vs Control</i></b> |         |      |                           |          |                        |                                        |                      |                 |     |
| Gray 1986                           | 150 mg  | w807 | Bleeding Peptic Ulcer     | Parallel | Unspecified method     | Double                                 | Yes                  | 50              | 52  |
| Ermolov 1995                        | 150 mg  | w808 | Bleeding Peptic Ulcer     | Parallel | Unspecified method     | Unknown                                | Yes                  | 31              | 33  |
| Stadler 1985 (pirenzipine)          | 150 mg  | w800 | Bleeding Peptic Ulcer     | Parallel | Unspecified method     | Unknown                                | Yes                  | 20              | 20  |
| Coraggio 1984                       | 300 mg  | w809 | UGI bleeding of any cause | Parallel | Unspecified method     | Unknown                                | Yes                  | 20              | 20  |
| Basso 1986                          | 300 mg  | w810 | UGI bleeding of any cause | Parallel | Unspecified method     | Double                                 | Yes                  | 33              | 33  |
| Stave 1986                          | 300 mg  | w811 | Bleeding Peptic Ulcer     | Parallel | Unspecified method     | Double                                 | No                   | 32              | 34  |
| Dawson 1982                         | 450 mg  | w812 | UGI bleeding of any cause | Parallel | Unspecified method     | Double                                 | Yes                  | 76              | 75  |

Design: Parallel=parallel trial. Factorial=Factorial trial. 'Extension' studies are studies in which patients are randomised more than once during the trial (only the parts of the trial that involve a valid randomised comparison for this meta-analysis, labelled X1, X2 etc., are shown in this table). Data shown for crossover trials reflect only events during the first phase of the trial. The suffixes A, B, C, D are used to distinguish different trials published by the same author in the same year.

Allocation concealment: IVRS (Interactive Voice Response System); Telephone (telephone central office); Pharmacy (pharmacy coded containers administered sequentially); Onsite computer (onsite computer accessible only after entering patient details); Sealed envelopes (sequentially numbered, opaque or without further specification); Closed list (closed list of random numbers); Other (other specified method); Unspecified (stated as being 'randomised' but with no other details).

Blinding of investigators and patients: Single=single-blind; Double=double-blind; Open=open label.

Availability of data: Data available for at least one endpoint of interest in the meta-analyses.

In cases where the number randomised was not reported, the number evaluated was used instead. In addition, for crossover trials, where neither the number randomised nor the number evaluated was reported, the total number of participants divided by number of arms was used.

**Webtable 4: Details of trials involving a randomised comparison of a proton pump inhibitor (X) versus a prostaglandin analogue (Y)**

| Trial name                         | Regimen            | Ref. | Indication for treatment                          | Design    | Allocation Concealment | Blinding of investigators and patients | Availability of data | No. of patients |     |
|------------------------------------|--------------------|------|---------------------------------------------------|-----------|------------------------|----------------------------------------|----------------------|-----------------|-----|
|                                    |                    |      |                                                   |           |                        |                                        |                      | NX              | NY  |
| <b>Prevention Trials</b>           |                    |      |                                                   |           |                        |                                        |                      |                 |     |
| <i>Lansoprazole vs Misoprostol</i> |                    |      |                                                   |           |                        |                                        |                      |                 |     |
| Graham 2002                        | 15 mg vs 800 ug    | w51  | Recently healed ulcers                            | Parallel  | Other method           | Double                                 | Yes                  | 136             | 134 |
| Graham 2002                        | 30 mg vs 800 ug    | w51  | Recently healed ulcers                            | Parallel  | Other method           | Double                                 | Yes                  | 133             | 134 |
| <i>Lansoprazole vs Rebamipide</i>  |                    |      |                                                   |           |                        |                                        |                      |                 |     |
| Murakami 2003                      | 30 mg vs 300 mg    | w813 | Gastritis or duodenitis                           | Crossover | Unspecified method     | Unknown                                | No                   | 8               | 8   |
| <i>Omeprazole vs Misoprostol</i>   |                    |      |                                                   |           |                        |                                        |                      |                 |     |
| OMNIUM 1998 X2                     | 20 mg vs 400 ug    | w113 | Recently healed ulcers                            | Extension | Unspecified method     | Double                                 | Yes                  | 274             | 296 |
| OMNIUM 1998 X1 (erosions)          | 20 mg vs 800 ug    | w113 | Antiplatelet therapy                              | Extension | Unspecified method     | Double                                 | No                   | 118             | 97  |
| OMNIUM 1998 X1 (erosions)          | 40 mg vs 800 ug    | w113 | Antiplatelet therapy                              | Extension | Unspecified method     | Double                                 | No                   | 109             | 97  |
| <i>Omeprazole vs Rebamipide</i>    |                    |      |                                                   |           |                        |                                        |                      |                 |     |
| Thong-Ngam 2010                    | 20 mg vs 300 mg    | w814 | Gastro-oesophageal reflux                         | Parallel  | Unspecified method     | Unknown                                | Yes                  | 25              | 18  |
| Kojima 2012                        | Unknown vs Unknown | w815 | Healthy volunteers                                | Parallel  | Unspecified method     | Unknown                                | No                   | -               | -   |
| Kojima 2012                        | Unknown vs Unknown | w815 | Healthy volunteers                                | Parallel  | Unspecified method     | Unknown                                | No                   | -               | -   |
| <i>Pantoprazole vs Misoprostol</i> |                    |      |                                                   |           |                        |                                        |                      |                 |     |
| Stupnicki 2003                     | 20 mg vs 400 ug    | w816 | Arthritis, rheumatic or musculoskeletal disorders | Parallel  | Closed list            | Double                                 | Yes                  | 257             | 258 |
| <i>Rabeprazole vs Rebamipide</i>   |                    |      |                                                   |           |                        |                                        |                      |                 |     |
| Thong-Ngam 2010                    | 20 mg vs 300 mg    | w814 | Gastro-oesophageal reflux                         | Parallel  | Unspecified method     | Unknown                                | Yes                  | 13              | 18  |
| <b>Healing Trials</b>              |                    |      |                                                   |           |                        |                                        |                      |                 |     |
| <i>Lansoprazole vs Rebamipide</i>  |                    |      |                                                   |           |                        |                                        |                      |                 |     |
|                                    |                    |      |                                                   |           |                        | Unspecified method                     |                      |                 |     |
| Takayama 2012                      | 60 mg vs 600 mg    | w817 | Endoscopic submucosal dissection                  | Parallel  | Unspecified method     | Unknown                                | Yes                  | 31              | 29  |
| Matsui 2012                        | 60 mg vs 600 mg    | w818 | Endoscopic submucosal dissection                  | Parallel  | Unspecified method     | Unknown                                | Yes                  | 27              | 27  |
| Nakamura 1995                      | 120 mg vs 900 mg   | w819 | Peptic ulcers                                     | Parallel  | Unspecified method     | Unknown                                | Yes                  | 5               | 5   |
| <i>Omeprazole vs Misoprostol</i>   |                    |      |                                                   |           |                        |                                        |                      |                 |     |
| OMNIUM 1998 X1 GU+DU               | 20 mg vs 800 ug    | w113 | Peptic ulcers                                     | Extension | Unspecified method     | Double                                 | Yes                  | 190             | 201 |
| OMNIUM 1998 X1 GU+DU               | 40 mg vs 800 ug    | w113 | Peptic ulcers                                     | Extension | Unspecified method     | Double                                 | Yes                  | 205             | 201 |
| <i>Omeprazole vs Rebamipide</i>    |                    |      |                                                   |           |                        |                                        |                      |                 |     |
| Song 2011                          | 20 mg vs 300 mg    | w820 | Peptic ulcers                                     | Parallel  | Unspecified method     | Double                                 | Yes                  | 63              | 65  |

DU=duodenal ulcer; GU=gastric ulcer.

Design: Parallel=parallel trial. Factorial=Factorial trial. 'Extension' studies are studies in which patients are randomised more than once during the trial (only the parts of the trial that involve a valid randomised comparison for this meta-analysis, labelled X1, X2 etc., are shown in this table). Data shown for crossover trials reflect only events during the first phase of the trial. The suffixes A, B, C, D are used to distinguish different trials published by the same author in the same year.

Allocation concealment: IVRS (Interactive Voice Response System); Telephone (telephone central office); Pharmacy (pharmacy coded containers administered sequentially); Onsite computer (onsite computer accessible only after entering patient details); Sealed envelopes (sequentially numbered, opaque or without further specification); Closed list (closed list of random numbers); Other (other specified method); Unspecified (stated as being 'randomised' but with no other details).

Blinding of investigators and patients: Single=single-blind; Double=double-blind; Open=open label.

Availability of data: Data available for at least one endpoint of interest in the meta-analyses.

In cases where the number randomised was not reported, the number evaluated was used instead. In addition, for crossover trials, where neither the number randomised nor the number evaluated was reported, the total number of participants divided by number of arms was used.

**Webtable 5: Details of trials involving a randomised comparison of a proton pump inhibitor (X) versus a histamine-2 receptor antagonist (Y)**

| Trial name                               | Regimen            | Ref. | Indication for treatment           | Design    | Allocation Concealment | Blinding of investigators and patients | Availability of data | No. of patients |     |
|------------------------------------------|--------------------|------|------------------------------------|-----------|------------------------|----------------------------------------|----------------------|-----------------|-----|
|                                          |                    |      |                                    |           |                        |                                        |                      | NX              | NY  |
| <b>Prevention Trials</b>                 |                    |      |                                    |           |                        |                                        |                      |                 |     |
| <b><i>Esomeprazole vs Famotidine</i></b> |                    |      |                                    |           |                        |                                        |                      |                 |     |
| Tunggal 2011                             | 20 mg vs 40 mg     | w821 | Acute coronary syndrome            | Parallel  | Sealed envelopes       | Double                                 | Yes                  | 55              | 52  |
| Ng 2012                                  | 20 mg vs 40 mg     | w822 | Acute coronary syndrome            | Parallel  | Sealed envelopes       | Double                                 | Yes                  | 164             | 149 |
| <b><i>Esomeprazole vs Ranitidine</i></b> |                    |      |                                    |           |                        |                                        |                      |                 |     |
| Norman Hansen 2005                       | 20 mg vs 300 mg    | w823 | Gastro-oesophageal reflux          | Parallel  | Onsite computer        | Open                                   | No                   | 658             | 610 |
| Hansen 2006                              | 20 mg vs 300 mg    | w824 | Gastro-oesophageal reflux          | Parallel  | Unspecified method     | Open                                   | No                   | 658             | 610 |
| Kilic 2008 (amoxicillin+moxifloxacin)    | 80 mg vs 800 mg    | w825 | Gastritis or duodenitis            | Parallel  | Unspecified method     | Open                                   | Yes                  | 30              | 30  |
| Kilic 2008 (amoxicillin+clarithromycin)  | 80 mg vs 800 mg    | w825 | Gastritis or duodenitis            | Parallel  | Unspecified method     | Open                                   | Yes                  | 30              | 30  |
| Nadeau 2012                              | Unknown vs Unknown | w826 | Percutaneous coronary intervention | Parallel  | Unspecified method     | Unknown                                | No                   | -               | -   |
| <b><i>Lansoprazole vs Famotidine</i></b> |                    |      |                                    |           |                        |                                        |                      |                 |     |
| Miyake 2005                              | 15 mg vs 40 mg     | w827 | Rheumatoid arthritis               | Parallel  | Sealed envelopes       | Unknown                                | Yes                  | 13              | 13  |
| Endo 2000                                | 15 mg vs 40 mg     | w828 | Gastro-oesophageal reflux          | Parallel  | Unspecified method     | Double                                 | No                   | 23              | 25  |
| Endo 2000                                | 30 mg vs 40 mg     | w828 | Gastro-oesophageal reflux          | Parallel  | Unspecified method     | Double                                 | No                   | 22              | 25  |
| Mine 2000                                | 30 mg vs 40 mg     | w829 | Gastro-oesophageal reflux          | Crossover | Unspecified method     | Double                                 | No                   | 9               | 8   |
| <b><i>Lansoprazole vs Lafutidine</i></b> |                    |      |                                    |           |                        |                                        |                      |                 |     |
| Kim 2008                                 | 60 mg vs 40 mg     | w830 | Gastritis or duodenitis            | Parallel  | Unspecified method     | Double                                 | Yes                  | 112             | 119 |
| <b><i>Lansoprazole vs Nizatidine</i></b> |                    |      |                                    |           |                        |                                        |                      |                 |     |
| Murakami 2003                            | 30 mg vs 300 mg    | w813 | Gastritis or duodenitis            | Crossover | Unspecified method     | Unknown                                | No                   | 8               | 8   |
| <b><i>Lansoprazole vs Ranitidine</i></b> |                    |      |                                    |           |                        |                                        |                      |                 |     |
| Petite 1991 B                            | 15 mg vs 300 mg    | w831 | Gastro-oesophageal reflux          | Parallel  | Unspecified method     | Double                                 | Yes                  | 63              | 55  |
| Bardhan 1999 A X2                        | 15 mg vs 150 mg    | w832 | Recently healed ulcers             | Extension | Unspecified method     | Double                                 | Yes                  | 121             | 116 |
| Müller 1997                              | 15 mg vs 300 mg    | w58  | Healthy volunteers                 | Parallel  | Unspecified method     | Double                                 | No                   | 10              | 10  |
| Meining 1998                             | 15 mg vs 150 mg    | w833 | Gastritis or duodenitis            | Parallel  | Unspecified method     | Unknown                                | No                   | 72              | 71  |
| Gough 1996                               | 15 mg vs 600 mg    | w834 | Gastro-oesophageal reflux          | Parallel  | Unspecified method     | Double                                 | Yes                  | 96              | 81  |
| Peura 2009 B                             | 15 mg vs 300 mg    | w835 | Gastro-oesophageal reflux          | Parallel  | Unspecified method     | Double                                 | No                   | 100             | 106 |
| Richter 2000 C                           | 15 mg vs 300 mg    | w67  | Gastro-oesophageal reflux          | Parallel  | Unspecified method     | Double                                 | No                   | 284             | 283 |
| Spadaccini 1998 (healed duodenal ulcer)  | 15 mg vs 800 ug    | w836 | Recently healed ulcers             | Parallel  | Unspecified method     | Open                                   | No                   | 18              | 13  |
| Spadaccini 1998 (healed gastric ulcer)   | 15 mg vs 800 mg    | w836 | Recently healed ulcers             | Parallel  | Unspecified method     | Open                                   | Yes                  | 2               | 2   |
| Spadaccini 1998                          | 15 mg vs 800 mg    | w836 | Gastritis and/or duodenitis        | Parallel  | Unspecified method     | Open                                   | No                   | 18              | 25  |
| Petite 1991 B                            | 30 mg vs 300 mg    | w831 | Gastro-oesophageal reflux          | Parallel  | Unspecified method     | Double                                 | Yes                  | 59              | 55  |
| Plein 1997                               | 30 mg vs 300 mg    | w837 | Gastro-oesophageal reflux          | Parallel  | Onsite computer        | Double                                 | No                   | 107             | 58  |
| Bardhan 1999 A X2                        | 30 mg vs 150 mg    | w832 | Recently healed ulcers             | Extension | Unspecified method     | Double                                 | Yes                  | 122             | 116 |
| Robinson 1995 A                          | 30 mg vs 300 mg    | w838 | Gastro-oesophageal reflux          | Parallel  | Unspecified method     | Double                                 | Yes                  | 119             | 128 |
| Bardhan 1995 A                           | 30 mg vs 300 mg    | w839 | Gastro-oesophageal reflux          | Parallel  | Closed list            | Double                                 | Yes                  | 77              | 77  |
| Feldman 1993                             | 30 mg vs 300 mg    | w840 | Gastro-oesophageal reflux          | Parallel  | Unspecified method     | Double                                 | Yes                  | 62              | 33  |
| Jansen 1999                              | 30 mg vs 600 mg    | w841 | Gastro-oesophageal reflux          | Parallel  | Unspecified method     | Double                                 | No                   | 68              | 65  |
| Jones 1997                               | 30 mg vs 300 mg    | w842 | Gastro-oesophageal reflux          | Parallel  | Other method           | Double                                 | No                   | 213             | 219 |
| Howden 2001                              | 30 mg vs 300 mg    | w843 | Gastro-oesophageal reflux          | Parallel  | Sealed envelopes       | Double                                 | No                   | 297             | 296 |
| Gough 1996                               | 30 mg vs 600 mg    | w834 | Gastro-oesophageal reflux          | Parallel  | Unspecified method     | Double                                 | Yes                  | 89              | 81  |
| Sontag 1997 B X1                         | 30 mg vs 300 mg    | w844 | Gastro-oesophageal reflux          | Parallel  | Unspecified method     | Double                                 | No                   | 69              | 36  |
| Richter 2000 C                           | 30 mg vs 300 mg    | w67  | Gastro-oesophageal reflux          | Parallel  | Unspecified method     | Double                                 | No                   | 288             | 283 |
| Sontag 1997                              | 30 mg vs 300 mg    | w845 | Gastro-oesophageal reflux          | Parallel  | Unspecified method     | Double                                 | No                   | 105             | 54  |
| Swarbrick 1996                           | 30 mg vs 600 mg    | w846 | Oesophageal stricture              | Parallel  | Pharmacy               | Double                                 | Yes                  | 78              | 80  |
| Bardhan 1995 A                           | 60 mg vs 300 mg    | w839 | Gastro-oesophageal reflux          | Parallel  | Closed list            | Double                                 | Yes                  | 75              | 77  |
| Treiber 1997                             | 60 mg vs 600 mg    | w847 | Gastritis or duodenitis            | Parallel  | Unspecified method     | Single                                 | No                   | 20              | 20  |
| <b><i>Lansoprazole vs Roxatidine</i></b> |                    |      |                                    |           |                        |                                        |                      |                 |     |
| Shimizu 2006                             | 30 mg vs 150 mg    | w848 | Asthma                             | Parallel  | Unspecified method     | Double                                 | Yes                  | 15              | 15  |
| <b><i>Omeprazole vs Cimetidine</i></b>   |                    |      |                                    |           |                        |                                        |                      |                 |     |
| Bate 1998                                | 10 mg vs 800 mg    | w849 | Gastro-oesophageal reflux          | Parallel  | Unspecified method     | Double                                 | Yes                  | 77              | 79  |

**Webtable 5 (cont.): Details of trials involving a randomised comparison of a proton pump inhibitor (X) versus histamine-2 receptor antagonist (Y)**

| Trial name                        | Regimen           | Ref. | Indication for treatment                         | Design    | Allocation Concealment | Blinding of investigators and patients | Availability of data | No. of patients |     |
|-----------------------------------|-------------------|------|--------------------------------------------------|-----------|------------------------|----------------------------------------|----------------------|-----------------|-----|
|                                   |                   |      |                                                  |           |                        |                                        |                      | NX              | NY  |
| Bate 1990                         | 20 mg vs 1600 mg  | w850 | Gastro-oesophageal reflux                        | Parallel  | Unspecified method     | Double                                 | Yes                  | 138             | 134 |
| Meineche-Schmidt 1997 (dyspepsia) | 20 mg vs 800 mg   | w140 | Gastro-oesophageal reflux                        | Parallel  | Unspecified method     | Double                                 | No                   | 225             | 244 |
| Thorens 1996                      | 20 mg vs 800 mg   | w851 | Gastro-oesophageal reflux                        | Parallel  | Unspecified method     | Double                                 | No                   | 19              | 18  |
| Dehn 1990                         | 40 mg vs 1600 mg  | w852 | Gastro-oesophageal reflux                        | Parallel  | Unspecified method     | Double                                 | No                   | 31              | 36  |
| Bate 1997                         | 1600 mg vs 400 mg | w853 | Gastro-oesophageal reflux                        | Parallel  | Unspecified method     | Double                                 | Yes                  | 112             | 109 |
| <b>Omeprazole vs Famotidine</b>   |                   |      |                                                  |           |                        |                                        |                      |                 |     |
| Shimatani 2007                    | 10 mg vs 40 mg    | w854 | Healthy volunteers                               | Crossover | Unspecified method     | Unknown                                | No                   | 4               | 4   |
| Yano 2012                         | 10 mg vs 20 mg    | w855 | Acute coronary syndrome                          | Parallel  | Other method           | Open                                   | Yes                  | 90              | 90  |
| J-FOCUS                           | 10 mg vs 20 mg    | w856 | Gastro-oesophageal reflux                        | Parallel  | Closed list            | Open                                   | No                   | 142             | 132 |
| Fujiwara 2005                     | 20 mg vs 40 mg    | w857 | Gastro-oesophageal reflux                        | Parallel  | Unspecified method     | Unknown                                | Yes                  | 53              | 53  |
| Wada 2005                         | 20 mg vs 40 mg    | w858 | Gastro-oesophageal reflux                        | Parallel  | Unspecified method     | Open                                   | No                   | 27              | 27  |
| Hu 2003                           | 20 mg vs 20 mg    | w859 | Gastritis or duodenitis                          | Parallel  | Unspecified method     | Unknown                                | Yes                  | 39              | 38  |
| Kawano 2002                       | 20 mg vs 40 mg    | w860 | Gastro-oesophageal reflux                        | Parallel  | Sealed envelopes       | Unknown                                | Yes                  | 29              | 27  |
| Miner 2006 A                      | 20 mg vs 40 mg    | w861 | Healthy volunteers                               | Crossover | Unspecified method     | Double                                 | Yes                  | 11              | 11  |
| Miner 2006 A                      | 20 mg vs 20 mg    | w861 | Healthy volunteers                               | Crossover | Unspecified method     | Double                                 | Yes                  | 11              | 11  |
| Soga 1999                         | 20 mg vs 40 mg    | w862 | Gastro-oesophageal reflux                        | Parallel  | Sealed envelopes       | Unknown                                | No                   | 36              | 35  |
| Guslandi 1994                     | 20 mg vs 40 mg    | w863 | Gastro-oesophageal reflux                        | Parallel  | Unspecified method     | Unknown                                | Yes                  | 6               | 6   |
| Kim 2015                          | 20 mg vs 40 mg    | w864 | Gastro-oesophageal reflux                        | Parallel  | Unspecified method     | Double                                 | Yes                  | 167             | 162 |
| Arbel 2013                        | 40 mg vs 80 mg    | w865 | Antiplatelet therapy                             | Crossover | Sealed envelopes       | Single                                 | Yes                  | 21              | 21  |
| <b>Omeprazole vs other H2RA</b>   |                   |      |                                                  |           |                        |                                        |                      |                 |     |
| Marks 1994                        | 20 mg vs Unknown  | w866 | Gastro-oesophageal reflux                        | Parallel  | Unspecified method     | Open                                   | Yes                  | 19              | 18  |
| <b>Omeprazole vs Ranitidine</b>   |                   |      |                                                  |           |                        |                                        |                      |                 |     |
| Kim 2004                          | 10 mg vs 300 mg   | w867 | Gastro-oesophageal reflux                        | Parallel  | Unspecified method     | Unknown                                | No                   | 50              | 50  |
| Hallerback 1994                   | 10 mg vs 300 mg   | w868 | Gastro-oesophageal reflux                        | Parallel  | Unspecified method     | Double                                 | Yes                  | 133             | 128 |
| Blum 2000                         | 10 mg vs 150 mg   | w104 | Gastro-oesophageal reflux                        | Parallel  | Unspecified method     | Double                                 | Yes                  | 202             | 194 |
| Karnes 1990                       | 10 mg vs 300 mg   | w869 | Healthy volunteers                               | Parallel  | Closed list            | Double                                 | No                   | 12              | 12  |
| Bardhan 1999 B                    | 10 mg vs 300 mg   | w870 | Gastro-oesophageal reflux                        | Parallel  | Onsite computer        | Double                                 | No                   | 227             | 229 |
| Jaspersen 1999                    | 10 mg vs 300 mg   | w871 | Gastro-oesophageal reflux                        | Parallel  | Unspecified method     | Unknown                                | No                   | 10              | 10  |
| Lauritsen 1999                    | 10 mg vs 150 mg   | w872 | Recently healed ulcers                           | Parallel  | Closed list            | Double                                 | Yes                  | 308             | 312 |
| Venables 1997 A                   | 10 mg vs 300 mg   | w873 | Gastro-oesophageal reflux                        | Parallel  | Unspecified method     | Double                                 | Yes                  | 338             | 326 |
| ASTRONAUT X2                      | 20 mg vs 300 mg   | w874 | Recently healed ulcers                           | Extension | Unspecified method     | Double                                 | Yes                  | 210             | 215 |
| Zeitoun 1989                      | 20 mg vs 300 mg   | w875 | Gastro-oesophageal reflux                        | Parallel  | Unspecified method     | Double                                 | Yes                  | 76              | 80  |
| Kaplan-Machlis 2000               | 20 mg vs 300 mg   | w876 | Gastro-oesophageal reflux                        | Parallel  | Sealed envelopes       | Open                                   | No                   | 138             | 130 |
| Diaz de Rojas 1998                | 20 mg vs 150 mg   | w877 | Recently healed ulcers                           | Parallel  | Unspecified method     | Double                                 | Yes                  | 215             | 219 |
| Annibale 1998                     | 20 mg vs 300 mg   | w878 | Gastro-oesophageal reflux                        | Parallel  | Unspecified method     | Double                                 | No                   | 106             | 111 |
| Maton 1999                        | 20 mg vs 300 mg   | w879 | Gastro-oesophageal reflux                        | Parallel  | Unspecified method     | Double                                 | Yes                  | 156             | 161 |
| Angelini 1993                     | 20 mg vs 300 mg   | w880 | Gastro-oesophageal reflux                        | Parallel  | Unspecified method     | Double                                 | No                   | 51              | 51  |
| Hungin 1993                       | 20 mg vs 300 mg   | w881 | Gastro-oesophageal reflux                        | Parallel  | Unspecified method     | Open                                   | Yes                  | 215             | 209 |
| Di Mario 1994                     | 20 mg vs 150 mg   | w882 | Recently healed ulcers                           | Parallel  | Unspecified method     | Open                                   | Yes                  | 30              | 12  |
| Armstrong 2005                    | 20 mg vs 300 mg   | w883 | Gastro-oesophageal reflux                        | Parallel  | Onsite computer        | Double                                 | Yes                  | 196             | 194 |
| Bianchi Porro 1992 B              | 20 mg vs 300 mg   | w884 | Gastro-oesophageal reflux                        | Parallel  | Unspecified method     | Double                                 | No                   | 30              | 30  |
| Frame 1991                        | 20 mg vs 300 mg   | w885 | Gastro-oesophageal reflux                        | Parallel  | Unspecified method     | Double                                 | Yes                  | 86              | 86  |
| Festen1999                        | 20 mg vs 600 mg   | w886 | Gastro-oesophageal reflux                        | Parallel  | Unspecified method     | Double                                 | No                   | 222             | 224 |
| Hallerback 1994                   | 20 mg vs 300 mg   | w868 | Gastro-oesophageal reflux                        | Parallel  | Unspecified method     | Double                                 | Yes                  | 131             | 128 |
| Blum 2000                         | 20 mg vs 150 mg   | w104 | Gastro-oesophageal reflux                        | Parallel  | Unspecified method     | Double                                 | Yes                  | 193             | 194 |
| Karnes 1990                       | 20 mg vs 300 mg   | w869 | Healthy volunteers                               | Parallel  | Closed list            | Double                                 | No                   | 12              | 12  |
| Savarino 2000                     | 20 mg vs 300 mg   | w887 | Gastro-oesophageal reflux                        | Parallel  | Closed list            | Open                                   | Yes                  | 30              | 30  |
| Bardhan 1999 B                    | 20 mg vs 300 mg   | w870 | Gastro-oesophageal reflux                        | Parallel  | Onsite computer        | Double                                 | No                   | 221             | 229 |
| Sartori 2000                      | 20 mg vs 300 mg   | w131 | Cancer or palliative care (non gastrointestinal) | Parallel  | Unspecified method     | Unknown                                | Yes                  | 76              | 77  |
| Smith 1994                        | 20 mg vs 150 mg   | w888 | Oesophageal stricture                            | Parallel  | Unspecified method     | Double                                 | No                   | 180             | 185 |



**Webtable 5 (cont.): Details of trials involving a randomised comparison of a proton pump inhibitor (X) versus histamine-2 receptor antagonist (Y)**

| Trial name                        | Regimen            | Ref. | Indication for treatment           | Design    | Allocation Concealment | Blinding of investigators and patients | Availability of data | No. of patients |     |
|-----------------------------------|--------------------|------|------------------------------------|-----------|------------------------|----------------------------------------|----------------------|-----------------|-----|
|                                   |                    |      |                                    |           |                        |                                        |                      | NX              | NY  |
| Zeitoun 1987                      | 20 mg vs 300 mg    | w889 | Gastro-oesophageal reflux          | Parallel  | Unspecified method     | Double                                 | No                   | 76              | 80  |
| Tham 1996                         | 20 mg vs 1200 mg   | w890 | Gastro-oesophageal reflux          | Parallel  | Unspecified method     | Single                                 | No                   | 20              | 20  |
| Richter 1996                      | 20 mg vs 300 mg    | w891 | Gastro-oesophageal reflux          | Parallel  | Unspecified method     | Open                                   | Yes                  | 100             | 97  |
| Revicki 1998                      | 20 mg vs 300 mg    | w892 | Gastro-oesophageal reflux          | Parallel  | Unspecified method     | Double                                 | Yes                  | 156             | 161 |
| Dent 1994                         | 20 mg vs 300 mg    | w893 | Gastro-oesophageal reflux          | Parallel  | Closed list            | Double                                 | Yes                  | 53              | 51  |
| Vigneri 1995                      | 20 mg vs 450 mg    | w894 | Gastro-oesophageal reflux          | Parallel  | Closed list            | Single                                 | No                   | 70              | 70  |
| Sandmark 1988                     | 20 mg vs 300 mg    | w895 | Gastro-oesophageal reflux          | Parallel  | Onsite computer        | Double                                 | Yes                  | 75              | 77  |
| Lauritsen 1999                    | 20 mg vs 150 mg    | w872 | Recently healed ulcers             | Parallel  | Closed list            | Double                                 | Yes                  | 308             | 312 |
| Venables 1997 A                   | 20 mg vs 300 mg    | w873 | Gastro-oesophageal reflux          | Parallel  | Unspecified method     | Double                                 | Yes                  | 330             | 326 |
| Figura 1995                       | 20 mg vs 150 mg    | w896 | Recently healed ulcers             | Parallel  | Unspecified method     | Unknown                                | Yes                  | 14              | 13  |
| Cavaljuga 2003                    | 20 mg vs 150 mg    | w897 | Gastritis or duodenitis            | Parallel  | Unspecified method     | Unknown                                | No                   | -               | -   |
| Bianchi Porro 1991 B              | 20 mg vs 300 mg    | w898 | Gastro-oesophageal reflux          | Parallel  | Unspecified method     | Double                                 | Yes                  | 27              | 17  |
| Ruth 1988                         | 20 mg vs 300 mg    | w899 | Gastro-oesophageal reflux          | Parallel  | Unspecified method     | Double                                 | Yes                  | 12              | 10  |
| Bate 1991                         | 20 mg vs 300 mg    | w900 | Gastro-oesophageal reflux          | Parallel  | Unspecified method     | Double                                 | Yes                  | 143             | 140 |
| Archambault 1996                  | 20 mg vs 450 mg    | w901 | Gastro-oesophageal reflux          | Parallel  | Closed list            | Single                                 | No                   | 1001            | 480 |
| Silvis 1996                       | 20 mg vs 300 mg    | w902 | Oesophageal stricture              | Parallel  | Unspecified method     | Unknown                                | No                   | 15              | 18  |
| Houben 1995                       | 20 mg vs 600 mg    | w141 | Healthy volunteers                 | Crossover | Unspecified method     | Double                                 | No                   | 3               | 3   |
| Green 1995                        | 35 mg vs 525 mg    | w903 | Gastro-oesophageal reflux          | Parallel  | Unspecified method     | Open                                   | Yes                  | 101             | 97  |
| Bergmann 1995 B                   | 40 mg vs 300 mg    | w904 | Gastro-oesophageal reflux          | Parallel  | Unspecified method     | Unknown                                | No                   | 294             | 136 |
| Prewett 1991                      | 40 mg vs 300 mg    | w905 | Healthy volunteers                 | Parallel  | Unspecified method     | Double                                 | No                   | 12              | 12  |
| Blum 1986                         | 40 mg vs 300 mg    | w906 | Gastro-oesophageal reflux          | Parallel  | Unspecified method     | Double                                 | No                   | 82              | 82  |
| Havelund 1988                     | 40 mg vs 300 mg    | w907 | Gastro-oesophageal reflux          | Parallel  | Closed list            | Double                                 | No                   | 80              | 82  |
| Jaspersen 1996                    | 40 mg vs 300 mg    | w908 | Gastro-oesophageal reflux          | Parallel  | Unspecified method     | Unknown                                | No                   | 20              | 18  |
| Karnes 1990                       | 40 mg vs 300 mg    | w869 | Healthy volunteers                 | Parallel  | Closed list            | Double                                 | No                   | 12              | 12  |
| Pellegrini 2005 G                 | 40 mg vs 600 mg    | w909 | Gastro-oesophageal reflux          | Parallel  | Unspecified method     | Open                                   | No                   | 48              | 47  |
| Vantrappen 1988                   | 40 mg vs 300 mg    | w910 | Gastro-oesophageal reflux          | Parallel  | Unspecified method     | Double                                 | Yes                  | 31              | 30  |
| Treiber 1997                      | 40 mg vs 600 mg    | w847 | Gastritis or duodenitis            | Parallel  | Unspecified method     | Single                                 | No                   | 20              | 20  |
| Hurlimann 1994                    | 40 mg vs 1200 mg   | w911 | Healthy volunteers                 | Parallel  | Unspecified method     | Double                                 | No                   | -               | -   |
| Dammann 1986 B                    | 40 mg vs 300 mg    | w912 | Gastro-oesophageal reflux          | Parallel  | Sealed envelopes       | Double                                 | No                   | 89              | 89  |
| Lundell 1991                      | 40 mg vs 600 mg    | w913 | Gastro-oesophageal reflux          | Parallel  | Closed list            | Double                                 | Yes                  | 51              | 47  |
| Houben 1995                       | 40 mg vs 600 mg    | w141 | Healthy volunteers                 | Crossover | Unspecified method     | Double                                 | No                   | 3               | 3   |
| Klinkenberg-Knol 1988             | 60 mg vs 300 mg    | w914 | Gastro-oesophageal reflux          | Crossover | Unspecified method     | Double                                 | Yes                  | 3               | 4   |
| Klinkenberg-Knol 1987             | 60 mg vs 300 mg    | w915 | Gastro-oesophageal reflux          | Parallel  | Unspecified method     | Double                                 | Yes                  | 25              | 26  |
| Ofman 2000                        | Unknown vs Unknown | w916 | Barrett's oesophagus               | Parallel  | Unspecified method     | Double                                 | No                   | -               | -   |
| Peters 1999 A                     | 80 mg vs 300 mg    | w917 | Barrett's oesophagus               | Parallel  | Closed list            | Double                                 | No                   | 33              | 35  |
| Peters 1999 B                     | 80 mg vs 300 mg    | w918 | Barrett's oesophagus               | Parallel  | Closed list            | Double                                 | No                   | 33              | 35  |
| Nadeau 2012                       | Unknown vs Unknown | w826 | Percutaneous coronary intervention | Parallel  | Unspecified method     | Unknown                                | No                   | -               | -   |
| Ahmad 2012                        | Unknown vs Unknown | w919 | Gastritis or duodenitis            | Parallel  | Unspecified method     | Unknown                                | No                   | 26              | 20  |
| <b>Omeprazole vs Roxatidine</b>   |                    |      |                                    |           |                        |                                        |                      |                 |     |
| Guslandi 1994                     | 20 mg vs 150 mg    | w863 | Gastro-oesophageal reflux          | Parallel  | Unspecified method     | Unknown                                | Yes                  | 6               | 6   |
| Nakamura 2010                     | 20 mg vs 150 mg    | w920 | Gastro-oesophageal reflux          | Parallel  | Unspecified method     | Unknown                                | Yes                  | 17              | 16  |
| Goh 1994                          | 40 mg vs 300 mg    | w921 | Gastritis or duodenitis            | Parallel  | Unspecified method     | Unknown                                | No                   | 11              | 14  |
| <b>Pantoprazole vs Famotidine</b> |                    |      |                                    |           |                        |                                        |                      |                 |     |
| Ng 2010                           | 20 mg vs 80 mg     | w922 | Recently healed ulcers             | Parallel  | Pharmacy               | Double                                 | Yes                  | 65              | 65  |
| Arbel 2013                        | 40 mg vs 80 mg     | w865 | Antiplatelet therapy               | Crossover | Sealed envelopes       | Single                                 | Yes                  | 21              | 21  |
| <b>Pantoprazole vs Lafutidine</b> |                    |      |                                    |           |                        |                                        |                      |                 |     |
| Maity 2014                        | 40 mg vs 10 mg     | w923 | Gastro-oesophageal reflux          | Parallel  | Unspecified method     | Open                                   | Yes                  | 61              | 61  |
| <b>Pantoprazole vs Nizatidine</b> |                    |      |                                    |           |                        |                                        |                      |                 |     |
| Kovacs 2002                       | 20 mg vs 300 mg    | w924 | Gastro-oesophageal reflux          | Parallel  | Unspecified method     | Double                                 | Yes                  | 80              | 82  |
| Armstrong 2001                    | 40 mg vs 300 mg    | w925 | Gastro-oesophageal reflux          | Parallel  | Closed list            | Double                                 | Yes                  | 111             | 109 |

**Webtable 5 (cont.): Details of trials involving a randomised comparison of a proton pump inhibitor (X) versus histamine-2 receptor antagonist (Y)**

| Trial name                        | Regimen            | Ref. | Indication for treatment           | Design    | Allocation Concealment | Blinding of investigators and patients | Availability of data | No. of patients |     |
|-----------------------------------|--------------------|------|------------------------------------|-----------|------------------------|----------------------------------------|----------------------|-----------------|-----|
|                                   |                    |      |                                    |           |                        |                                        |                      | NX              | NY  |
| Kovacs 2002                       | 40 mg vs 300 mg    | w924 | Gastro-oesophageal reflux          | Parallel  | Unspecified method     | Double                                 | Yes                  | 81              | 82  |
| Pare 2003                         | 40 mg vs 300 mg    | w926 | Gastro-oesophageal reflux          | Parallel  | Unspecified method     | Double                                 | No                   | 111             | 109 |
| <b>Pantoprazole vs Ranitidine</b> |                    |      |                                    |           |                        |                                        |                      |                 |     |
| Metz 2003                         | 10 mg vs 300 mg    | w927 | Gastro-oesophageal reflux          | Parallel  | Unspecified method     | Double                                 | Yes                  | 89              | 95  |
| Richter 2004                      | 10 mg vs 300 mg    | w928 | Gastro-oesophageal reflux          | Parallel  | Other method           | Double                                 | No                   | 88              | 88  |
| Talley 2002                       | 20 mg vs 300 mg    | w929 | Gastro-oesophageal reflux          | Parallel  | Closed list            | Double                                 | No                   | 154             | 153 |
| Van Zyl 2004                      | 20 mg vs 300 mg    | w930 | Gastro-oesophageal reflux          | Parallel  | Closed list            | Double                                 | No                   | 167             | 171 |
| Ramirez-Barba 1999                | 20 mg vs 300 mg    | w931 | Gastro-oesophageal reflux          | Parallel  | Unspecified method     | Double                                 | No                   | 184             | 89  |
| Metz 2003                         | 20 mg vs 300 mg    | w927 | Gastro-oesophageal reflux          | Parallel  | Unspecified method     | Double                                 | Yes                  | 93              | 95  |
| Adamek 2001                       | 20 mg vs 150 mg    | w932 | Gastro-oesophageal reflux          | Parallel  | Unspecified method     | Double                                 | No                   | 199             | 104 |
| Detmer 1998                       | 20 mg vs 300 mg    | w933 | Gastro-oesophageal reflux          | Parallel  | Unspecified method     | Double                                 | No                   | 105             | 104 |
| Kaspari 2001                      | 20 mg vs 300 mg    | w934 | Gastro-oesophageal reflux          | Parallel  | Unspecified method     | Double                                 | No                   | 181             | 175 |
| Van Zyl 2000                      | 20 mg vs 300 mg    | w935 | Gastro-oesophageal reflux          | Parallel  | Closed list            | Double                                 | No                   | 101             | 100 |
| Richter 2004                      | 20 mg vs 300 mg    | w928 | Gastro-oesophageal reflux          | Parallel  | Other method           | Double                                 | No                   | 88              | 88  |
| Dulbecco 2003                     | 40 mg vs 30 mg     | w936 | Gastro-oesophageal reflux          | Parallel  | Unspecified method     | Open                                   | No                   | 30              | 30  |
| Duvnjak 2002                      | 40 mg vs 300 mg    | w937 | Gastro-oesophageal reflux          | Parallel  | Unspecified method     | Open                                   | No                   | 100             | 84  |
| Metz 2003                         | 40 mg vs 300 mg    | w927 | Gastro-oesophageal reflux          | Parallel  | Unspecified method     | Double                                 | Yes                  | 94              | 95  |
| Awad 2001                         | 40 mg vs 300 mg    | w938 | Gastro-oesophageal reflux          | Parallel  | Onsite computer        | Double                                 | Yes                  | 12              | 10  |
| Teyssen 2001                      | 40 mg vs 300 mg    | w939 | Healthy volunteers                 | Crossover | Closed list            | Open                                   | Yes                  | 10              | 10  |
| Koop 1995                         | 40 mg vs 300 mg    | w940 | Gastro-oesophageal reflux          | Parallel  | Unspecified method     | Double                                 | No                   | 166             | 83  |
| Meneghelli 2002                   | 40 mg vs 300 mg    | w941 | Gastro-oesophageal reflux          | Parallel  | Onsite computer        | Double                                 | No                   | 128             | 128 |
| Armbrecht 1997                    | 40 mg vs 300 mg    | w942 | Gastro-oesophageal reflux          | Parallel  | Unspecified method     | Double                                 | Yes                  | 11              | 13  |
| Richter 2004                      | 40 mg vs 300 mg    | w928 | Gastro-oesophageal reflux          | Parallel  | Other method           | Double                                 | No                   | 85              | 88  |
| Gallo 1998                        | 40 mg vs 300 mg    | w943 | Gastro-oesophageal reflux          | Parallel  | Unspecified method     | Double                                 | No                   | 211             | 104 |
| Müller 1998                       | 40 mg vs 300 mg    | w190 | Healthy volunteers                 | Parallel  | Unspecified method     | Double                                 | Yes                  | 16              | 16  |
| Parri 2011                        | 40 mg vs 150 mg    | w944 | Antiplatelet therapy               | Parallel  | Unspecified method     | Open                                   | No                   | 54              | 51  |
| Demir 2009 (diabetes mellitus)    | 80 mg vs 800 mg    | w945 | Diabetes                           | Parallel  | Unspecified method     | Unknown                                | Yes                  | 49              | 49  |
| Demir 2009 (no diabetes mellitus) | 80 mg vs 800 mg    | w945 | Gastro-oesophageal reflux          | Parallel  | Unspecified method     | Unknown                                | Yes                  | 58              | 58  |
| Nadeau 2012                       | Unknown vs Unknown | w826 | Percutaneous coronary intervention | Parallel  | Unspecified method     | Unknown                                | No                   | -               | -   |
| <b>Rabeprazole vs Famotidine</b>  |                    |      |                                    |           |                        |                                        |                      |                 |     |
| Chan 2014 B                       | 20 mg vs 40 mg     | w946 | Antiplatelet therapy               | Parallel  | Unspecified method     | Double                                 | Yes                  | 84              | 79  |
| ACCEL-PROTECT                     | 20 mg vs 40 mg     | w947 | Percutaneous coronary intervention | Parallel  | Unspecified method     | Unknown                                | No                   | 40              | 40  |
| <b>Rabeprazole vs Lafutidine</b>  |                    |      |                                    |           |                        |                                        |                      |                 |     |
| Dewan 2011                        | 20 mg vs 10 mg     | w948 | Gastro-oesophageal reflux          | Parallel  | Unspecified method     | Open                                   | Yes                  | 101             | 101 |
| <b>Rabeprazole vs Ranitidine</b>  |                    |      |                                    |           |                        |                                        |                      |                 |     |
| Jee 2005                          | 10 mg vs 300 mg    | w949 | Gastro-oesophageal reflux          | Parallel  | Unspecified method     | Unknown                                | No                   | 42              | 42  |
| Jeong 2006                        | 20 mg vs 600 mg    | w950 | Gastro-oesophageal reflux          | Parallel  | Unspecified method     | Open                                   | Yes                  | 53              | 57  |
| Farley 2000                       | 20 mg vs 600 mg    | w951 | Gastro-oesophageal reflux          | Parallel  | Unspecified method     | Double                                 | No                   | 169             | 169 |
| Dai 2015                          | 20 mg vs 300 mg    | w952 | Gastro-oesophageal reflux          | Parallel  | Unspecified method     | Unknown                                | Yes                  | 65              | 65  |
| <b>Healing Trials</b>             |                    |      |                                    |           |                        |                                        |                      |                 |     |
| <b>Esomeprazole vs Ranitidine</b> |                    |      |                                    |           |                        |                                        |                      |                 |     |
| Astra Zeneca 285                  | 20 mg vs 300 mg    | w953 | Peptic ulcers                      | Parallel  | Sealed envelopes       | Double                                 | Yes                  | 140             | 134 |
| Astra Zeneca 286                  | 20 mg vs 300 mg    | w954 | Peptic ulcers                      | Parallel  | Sealed envelopes       | Double                                 | Yes                  | 150             | 149 |
| Astra Zeneca 285                  | 40 mg vs 300 mg    | w953 | Peptic ulcers                      | Parallel  | Sealed envelopes       | Double                                 | Yes                  | 132             | 134 |
| Astra Zeneca 286                  | 40 mg vs 300 mg    | w954 | Peptic ulcers                      | Parallel  | Sealed envelopes       | Double                                 | Yes                  | 141             | 149 |
| <b>Lansoprazole vs Cimetidine</b> |                    |      |                                    |           |                        |                                        |                      |                 |     |
| Aoyama 1995                       | 30 mg vs 800 mg    | w955 | Peptic ulcers                      | Parallel  | Unspecified method     | Unknown                                | Yes                  | 70              | 23  |
| <b>Lansoprazole vs Famotidine</b> |                    |      |                                    |           |                        |                                        |                      |                 |     |
| Tsuji 1995                        | 30 mg vs 40 mg     | w956 | Peptic ulcers                      | Parallel  | Unspecified method     | Unknown                                | Yes                  | 8               | 8   |

**Webtable 5 (cont.): Details of trials involving a randomised comparison of a proton pump inhibitor (X) versus histamine-2 receptor antagonist (Y)**

| Trial name                        | Regimen          | Ref. | Indication for treatment         | Design    | Allocation Concealment | Blinding of investigators and patients | Availability of data | No. of patients |     |
|-----------------------------------|------------------|------|----------------------------------|-----------|------------------------|----------------------------------------|----------------------|-----------------|-----|
|                                   |                  |      |                                  |           |                        |                                        |                      | NX              | NY  |
| Sakaguchi 1995                    | 30 mg vs 40 mg   | w957 | Peptic ulcers                    | Parallel  | Sealed envelopes       | Unknown                                | Yes                  | 10              | 10  |
| Okai 1995                         | 30 mg vs 40 mg   | w958 | Peptic ulcers                    | Parallel  | Unspecified method     | Unknown                                | Yes                  | 12              | 12  |
| Hotz 1992                         | 30 mg vs 40 mg   | w959 | Peptic ulcers                    | Parallel  | Other method           | Double                                 | Yes                  | 174             | 90  |
| Nema 2010                         | 30 mg vs 40 mg   | w960 | Peptic ulcers                    | Parallel  | Onsite computer        | Unknown                                | Yes                  | 30              | 30  |
| Nakamura 1995                     | 120 mg vs 40 mg  | w819 | Peptic ulcers                    | Parallel  | Unspecified method     | Unknown                                | Yes                  | 5               | 5   |
| <b>Lansoprazole vs other H2RA</b> |                  |      |                                  |           |                        |                                        |                      |                 |     |
| Nema 2008                         | 30 mg vs Unknown | w961 | Peptic ulcers                    | Parallel  | Onsite computer        | Unknown                                | Yes                  | 16              | 14  |
| <b>Lansoprazole vs Ranitidine</b> |                  |      |                                  |           |                        |                                        |                      |                 |     |
| Londong 1991                      | 7.5 mg vs 300 mg | w962 | Peptic ulcers                    | Parallel  | Other method           | Double                                 | Yes                  | 77              | 79  |
| Licht 1990                        | 7.5 mg vs 300 mg | w963 | Peptic ulcers                    | Parallel  | Unspecified method     | Double                                 | Yes                  | 45              | 48  |
| Londong 1991                      | 15 mg vs 300 mg  | w962 | Peptic ulcers                    | Parallel  | Other method           | Double                                 | Yes                  | 80              | 79  |
| Licht 1990                        | 15 mg vs 300 mg  | w963 | Peptic ulcers                    | Parallel  | Unspecified method     | Double                                 | Yes                  | 45              | 48  |
| Agrawal 2000                      | 15 mg vs 300 mg  | w964 | Peptic ulcers                    | Parallel  | Unspecified method     | Double                                 | Yes                  | 119             | 117 |
| Jhala 1995                        | 15 mg vs 300 mg  | w233 | Peptic ulcers                    | Parallel  | Unspecified method     | Double                                 | Yes                  | 34              | 33  |
| Spadaccini 1998 (duodenal ulcer)  | 15 mg vs 800 mg  | w836 | Peptic ulcers                    | Parallel  | Unspecified method     | Open                                   | Yes                  | 13              | 12  |
| Lanza 1994                        | 15 mg vs 300 mg  | w234 | Peptic ulcers                    | Parallel  | Unspecified method     | Double                                 | Yes                  | 87              | 86  |
| Goldstein 2000                    | 15 mg vs 300 mg  | w965 | Peptic ulcers                    | Parallel  | Unspecified method     | Double                                 | Yes                  | 114             | 116 |
| Spadaccini 1998 (gastric ulcer)   | 15 mg vs 800 mg  | w836 | Peptic ulcers                    | Parallel  | Unspecified method     | Open                                   | Yes                  | 5               | 4   |
| Michel 1994                       | 30 mg vs 300 mg  | w966 | Peptic ulcers                    | Parallel  | Unspecified method     | Double                                 | Yes                  | 79              | 79  |
| Londong 1991                      | 30 mg vs 300 mg  | w962 | Peptic ulcers                    | Parallel  | Other method           | Double                                 | Yes                  | 78              | 79  |
| Licht 1990                        | 30 mg vs 300 mg  | w963 | Peptic ulcers                    | Parallel  | Unspecified method     | Double                                 | Yes                  | 45              | 48  |
| Agrawal 2000                      | 30 mg vs 300 mg  | w964 | Peptic ulcers                    | Parallel  | Unspecified method     | Double                                 | Yes                  | 117             | 117 |
| Bardhan 1999 A X1                 | 30 mg vs 300 mg  | w832 | Peptic ulcers                    | Extension | Unspecified method     | Double                                 | Yes                  | 219             | 217 |
| Capurso 1995 A                    | 30 mg vs 300 mg  | w967 | Peptic ulcers                    | Parallel  | Other method           | Double                                 | Yes                  | 29              | 34  |
| Jhala 1995                        | 30 mg vs 300 mg  | w233 | Peptic ulcers                    | Parallel  | Unspecified method     | Double                                 | Yes                  | 33              | 33  |
| Hawkey 1993                       | 30 mg vs 300 mg  | w968 | Peptic ulcers                    | Parallel  | Unspecified method     | Double                                 | Yes                  | 95              | 98  |
| Lazzaroni 1997                    | 30 mg vs 300 mg  | w969 | Peptic ulcers                    | Parallel  | Unspecified method     | Single                                 | Yes                  | 40              | 40  |
| Bardhan 1994                      | 30 mg vs 300 mg  | w970 | Peptic ulcers                    | Parallel  | Closed list            | Double                                 | Yes                  | 82              | 83  |
| Lanza 1994                        | 30 mg vs 300 mg  | w234 | Peptic ulcers                    | Parallel  | Unspecified method     | Double                                 | Yes                  | 84              | 86  |
| Russo 1997 X1                     | 30 mg vs 300 mg  | w66  | Peptic ulcers                    | Extension | Other method           | Double                                 | Yes                  | 68              | 64  |
| Goldstein 2000                    | 30 mg vs 300 mg  | w965 | Peptic ulcers                    | Parallel  | Unspecified method     | Double                                 | Yes                  | 112             | 116 |
| Vreer 1999                        | 30 mg vs 300 mg  | w971 | Peptic ulcers                    | Parallel  | Unspecified method     | Double                                 | Yes                  | 42              | 45  |
| Hawkey 1993                       | 60 mg vs 300 mg  | w968 | Peptic ulcers                    | Parallel  | Unspecified method     | Double                                 | Yes                  | 96              | 98  |
| Bardhan 1994                      | 60 mg vs 300 mg  | w970 | Peptic ulcers                    | Parallel  | Closed list            | Double                                 | Yes                  | 85              | 83  |
| <b>Lansoprazole vs Roxatidine</b> |                  |      |                                  |           |                        |                                        |                      |                 |     |
| Fujino 1995                       | 30 mg vs 150 mg  | w972 | Peptic ulcers                    | Parallel  | Sealed envelopes       | Unknown                                | Yes                  | 66              | 66  |
| Imaeda 2011                       | 30 mg vs 150 mg  | w973 | Endoscopic submucosal dissection | Parallel  | Other method           | Unknown                                | Yes                  | 65              | 64  |
| <b>Omeprazole vs Cimetidine</b>   |                  |      |                                  |           |                        |                                        |                      |                 |     |
| Bigard 1987                       | 20 mg vs 800 mg  | w974 | Peptic ulcers                    | Parallel  | Unspecified method     | Double                                 | Yes                  | 144             | 154 |
| Archambault 1988                  | 20 mg vs 1200 mg | w975 | Peptic ulcers                    | Parallel  | Unspecified method     | Double                                 | Yes                  | 85              | 84  |
| Wilairatana 1989                  | 20 mg vs 800 mg  | w976 | Peptic ulcers                    | Parallel  | Unspecified method     | Double                                 | Yes                  | 129             | 128 |
| Crowe 1989                        | 20 mg vs 800 mg  | w977 | Peptic ulcers                    | Parallel  | Unspecified method     | Double                                 | Yes                  | 98              | 91  |
| Pan 1994                          | 20 mg vs 800 mg  | w978 | Peptic ulcers                    | Parallel  | Unspecified method     | Single                                 | Yes                  | 44              | 64  |
| Kim 1994                          | 20 mg vs 900 mg  | w979 | Peptic ulcers                    | Parallel  | Unspecified method     | Unknown                                | Yes                  | 13              | 12  |
| Bate 1989                         | 20 mg vs 800 mg  | w980 | Peptic ulcers                    | Parallel  | Unspecified method     | Double                                 | Yes                  | 105             | 92  |
| Lauritsen 1985                    | 30 mg vs 1000 mg | w981 | Peptic ulcers                    | Parallel  | Unspecified method     | Double                                 | Yes                  | 67              | 65  |
| Danish Omeprazole Study           | 30 mg vs 1000 mg | w982 | Peptic ulcers                    | Parallel  | Closed list            | Double                                 | Yes                  | 79              | 82  |
| Dahlgren 1988                     | 30 mg vs 800 mg  | w983 | Peptic ulcers                    | Parallel  | Unspecified method     | Double                                 | Yes                  | 79              | 75  |
| Lauritsen 1989 B                  | 30 mg vs 1000 mg | w984 | Peptic ulcers                    | Parallel  | Unspecified method     | Double                                 | Yes                  | 90              | 86  |

**Webtable 5 (cont.): Details of trials involving a randomised comparison of a proton pump inhibitor (X) versus histamine-2 receptor antagonist (Y)**

| Trial name                              | Regimen          | Ref.  | Indication for treatment         | Design    | Allocation Concealment | Blinding of investigators and patients | Availability of data | No. of patients |     |
|-----------------------------------------|------------------|-------|----------------------------------|-----------|------------------------|----------------------------------------|----------------------|-----------------|-----|
|                                         |                  |       |                                  |           |                        |                                        |                      | NX              | NY  |
| <b>Omeprazole vs Famotidine</b>         |                  |       |                                  |           |                        |                                        |                      |                 |     |
| Popovic 1990                            | 20 mg vs 40 mg   | w985  | Peptic ulcers                    | Parallel  | Unspecified method     | Double                                 | Yes                  | 70              | 69  |
| Lin 1994                                | 20 mg vs 40 mg   | w986  | Peptic ulcers                    | Parallel  | Closed list            | Unknown                                | Yes                  | 30              | 30  |
| Esaki 2002                              | 20 mg vs 40 mg   | w987  | Endoscopic mucosal resection     | Parallel  | Unspecified method     | Single                                 | Yes                  | 8               | 8   |
| Delle Fave 1992                         | 20 mg vs 40 mg   | w988  | Peptic ulcers                    | Parallel  | Unspecified method     | Double                                 | Yes                  | 116             | 125 |
| Ramesh Kumar 1992                       | 20 mg vs 40 mg   | w989  | Peptic ulcers                    | Parallel  | Other method           | Double                                 | Yes                  | 73              | 67  |
| Misra 1993                              | 20 mg vs 40 mg   | w990  | Peptic ulcers                    | Parallel  | Unspecified method     | Double                                 | Yes                  | 30              | 30  |
| Yamaguchi 2005                          | 20 mg vs 40 mg   | w991  | Endoscopic mucosal resection     | Parallel  | Unspecified method     | Unknown                                | No                   | 29              | 28  |
| Ye 2006                                 | 20 mg vs 40 mg   | w992  | Endoscopic mucosal resection     | Parallel  | Unspecified method     | Double                                 | Yes                  | 50              | 50  |
| Tomita 2012                             | 20 mg vs 40 mg   | w993  | Endoscopic submucosal dissection | Parallel  | Unspecified method     | Single                                 | Yes                  | 79              | 79  |
| Di Mario 1993 A                         | 40 mg vs 40 mg   | w994  | Peptic ulcers                    | Parallel  | Unspecified method     | Unknown                                | Yes                  | 12              | 7   |
| Goh 1996                                | 40 mg vs 80 mg   | w995  | Peptic ulcers                    | Parallel  | Unspecified method     | Single                                 | Yes                  | 33              | 33  |
| Hsu 2001                                | 40 mg vs 80 mg   | w996  | Peptic ulcers                    | Parallel  | Unspecified method     | Unknown                                | Yes                  | 60              | 60  |
| <b>Omeprazole vs H2RA</b>               |                  |       |                                  |           |                        |                                        |                      |                 |     |
| Wang 1996 (no amoxicillin)              | 20 mg vs Unknown | w997  | Peptic ulcers                    | Extension | Unspecified method     | Unknown                                | Yes                  | 22              | 21  |
| <b>Omeprazole vs Ranitidine</b>         |                  |       |                                  |           |                        |                                        |                      |                 |     |
| Hui 1989 A                              | 10 mg vs 300 mg  | w998  | Peptic ulcers                    | Parallel  | Unspecified method     | Double                                 | Yes                  | 90              | 90  |
| Hui 1989 B                              | 10 mg vs 300 mg  | w999  | Peptic ulcers                    | Parallel  | Unspecified method     | Double                                 | Yes                  | 3               | 3   |
| ASTRONAUT X1                            | 20 mg vs 300 mg  | w874  | Peptic ulcers                    | Extension | Unspecified method     | Double                                 | Yes                  | 113             | 117 |
| Marks 1991                              | 20 mg vs 300 mg  | w1000 | Peptic ulcers                    | Parallel  | Unspecified method     | Double                                 | Yes                  | 104             | 106 |
| Valenzuela 1991                         | 20 mg vs 300 mg  | w1001 | Peptic ulcers                    | Parallel  | Unspecified method     | Double                                 | Yes                  | 151             | 158 |
| Walan 1989                              | 20 mg vs 300 mg  | w1002 | Peptic ulcers                    | Parallel  | Unspecified method     | Double                                 | Yes                  | 203             | 205 |
| Bergmann 1995 A                         | 20 mg vs 300 mg  | w1003 | Peptic ulcers                    | Parallel  | Unspecified method     | Unknown                                | Yes                  | 373             | 172 |
| Miszputen 1997                          | 20 mg vs 300 mg  | w1004 | Peptic ulcers                    | Parallel  | Unspecified method     | Double                                 | Yes                  | 92              | 88  |
| Lee 1991 A (gastric ulcer)              | 20 mg vs 300 mg  | w1005 | Peptic ulcers                    | Parallel  | Unspecified method     | Double                                 | Yes                  | 10              | 6   |
| Classen 1985 A                          | 20 mg vs 300 mg  | w1006 | Peptic ulcers                    | Parallel  | Unspecified method     | Double                                 | Yes                  | 168             | 166 |
| Hotz 1995 B (gastric ulcer)             | 20 mg vs 300 mg  | w1007 | Peptic ulcers                    | Parallel  | Onsite computer        | Unknown                                | Yes                  | 15              | 13  |
| Hallerbäck 1998 A                       | 20 mg vs 300 mg  | w1008 | Peptic ulcers                    | Parallel  | Unspecified method     | Double                                 | Yes                  | 195             | 198 |
| Arber 1994                              | 20 mg vs 300 mg  | w1009 | Peptic ulcers                    | Parallel  | Unspecified method     | Double                                 | Yes                  | 103             | 100 |
| Al Karawi 1996                          | 20 mg vs 300 mg  | w1010 | Peptic ulcers                    | Parallel  | Unspecified method     | Double                                 | Yes                  | 67              | 67  |
| Barbara 1987                            | 20 mg vs 300 mg  | w1011 | Peptic ulcers                    | Parallel  | Unspecified method     | Double                                 | Yes                  | 64              | 64  |
| Ahmed 1995                              | 20 mg vs 300 mg  | w1012 | Peptic ulcers                    | Parallel  | Unspecified method     | Open                                   | Yes                  | 21              | 20  |
| Bardhan 1986                            | 20 mg vs 300 mg  | w1013 | Peptic ulcers                    | Parallel  | Unspecified method     | Double                                 | Yes                  | 34              | 35  |
| Lysy 1992                               | 20 mg vs 300 mg  | w1014 | Peptic ulcers                    | Parallel  | Unspecified method     | Double                                 | Yes                  | 30              | 30  |
| Chelvam 1989                            | 20 mg vs 300 mg  | w1015 | Peptic ulcers                    | Parallel  | Unspecified method     | Double                                 | Yes                  | 109             | 111 |
| Archimandritis 1995                     | 20 mg vs 300 mg  | w1016 | Peptic ulcers                    | Parallel  | Unspecified method     | Unknown                                | No                   | 126             | 119 |
| Italian Cooperative Group on Omeprazole | 20 mg vs 300 mg  | w1017 | Peptic ulcers                    | Parallel  | Unspecified method     | Double                                 | Yes                  | 84              | 83  |
| Zaterka 1993                            | 20 mg vs 300 mg  | w1018 | Peptic ulcers                    | Parallel  | Unspecified method     | Double                                 | Yes                  | 120             | 121 |
| Crowe 1994                              | 20 mg vs 300 mg  | w1019 | Peptic ulcers                    | Parallel  | Unspecified method     | Double                                 | Yes                  | 117             | 121 |
| Delchier 1989                           | 20 mg vs 300 mg  | w1020 | Peptic ulcers                    | Parallel  | Unspecified method     | Double                                 | Yes                  | 75              | 76  |
| Choi 1994                               | 20 mg vs 300 mg  | w1021 | Peptic ulcers                    | Parallel  | Other method           | Double                                 | Yes                  | 126             | 124 |
| Catalano 1991                           | 20 mg vs 300 mg  | w1022 | Peptic ulcers                    | Parallel  | Unspecified method     | Double                                 | Yes                  | 22              | 21  |
| Pare 1990                               | 20 mg vs 300 mg  | w1023 | Peptic ulcers                    | Parallel  | Unspecified method     | Double                                 | Yes                  | 39              | 41  |
| Hui 1989 A                              | 20 mg vs 300 mg  | w998  | Peptic ulcers                    | Parallel  | Unspecified method     | Double                                 | Yes                  | 90              | 90  |
| Mulder 1989                             | 20 mg vs 300 mg  | w1024 | Peptic ulcers                    | Parallel  | Onsite computer        | Double                                 | Yes                  | 91              | 90  |
| Hui 1989 B                              | 20 mg vs 300 mg  | w999  | Peptic ulcers                    | Parallel  | Unspecified method     | Double                                 | Yes                  | 2               | 3   |
| Rossini 1989                            | 20 mg vs 300 mg  | w1025 | Peptic ulcers                    | Parallel  | Unspecified method     | Double                                 | Yes                  | 9               | 9   |
| Wang 1992                               | 20 mg vs 300 mg  | w1026 | Peptic ulcers                    | Parallel  | Unspecified method     | Double                                 | Yes                  | 118             | 108 |
| McFarland 1990                          | 20 mg vs 300 mg  | w1027 | Peptic ulcers                    | Parallel  | Unspecified method     | Double                                 | Yes                  | 126             | 122 |
| Classen 1985 B                          | 20 mg vs 300 mg  | w1028 | Peptic ulcers                    | Parallel  | Unspecified method     | Double                                 | Yes                  | 84              | 74  |
| Glise 1991                              | 20 mg vs 300 mg  | w1029 | Peptic ulcers                    | Parallel  | Unspecified method     | Double                                 | No                   | 234             | 240 |

**Webtable 5 (cont.): Details of trials involving a randomised comparison of a proton pump inhibitor (X) versus histamine-2 receptor antagonist (Y)**

| Trial name                              | Regimen            | Ref.  | Indication for treatment         | Design    | Allocation Concealment | Blinding of investigators and patients | Availability of data | No. of patients |     |
|-----------------------------------------|--------------------|-------|----------------------------------|-----------|------------------------|----------------------------------------|----------------------|-----------------|-----|
|                                         |                    |       |                                  |           |                        |                                        |                      | NX              | NY  |
| Sonnenberg 1999                         | 20 mg vs 300 mg    | w1030 | Peptic ulcers                    | Parallel  | Unspecified method     | Double                                 | No                   | 279             | 263 |
| Hotz 1995 B (duodenal ulcer)            | 20 mg vs 300 mg    | w1007 | Peptic ulcers                    | Parallel  | Closed list            | Unknown                                | Yes                  | 13              | 12  |
| Diaz Rubio 1991                         | 20 mg vs 300 mg    | w1031 | Peptic ulcers                    | Parallel  | Unspecified method     | Double                                 | Yes                  | 79              | 79  |
| Parodi 1992                             | 20 mg vs 300 mg    | w1032 | Peptic ulcers                    | Parallel  | Unspecified method     | Unknown                                | Yes                  | 10              | 10  |
| Lee 1991 A (duodenal ulcer)             | 20 mg vs 300 mg    | w1005 | Peptic ulcers                    | Parallel  | Unspecified method     | Double                                 | Yes                  | 21              | 16  |
| Cataldo 1996                            | 27 mg vs 400 mg    | w1033 | Peptic ulcers                    | Parallel  | Unspecified method     | Unknown                                | Yes                  | 20              | 20  |
| Kager 1991                              | 30 mg vs 300 mg    | w1034 | Peptic ulcers                    | Parallel  | Unspecified method     | Double                                 | Yes                  | 74              | 73  |
| ASTRONAUT X1                            | 40 mg vs 300 mg    | w874  | Peptic ulcers                    | Extension | Unspecified method     | Double                                 | Yes                  | 114             | 117 |
| Walan 1989                              | 40 mg vs 300 mg    | w1002 | Peptic ulcers                    | Parallel  | Unspecified method     | Double                                 | Yes                  | 194             | 205 |
| Sonnenberg 1998                         | 40 mg vs 300 mg    | w1035 | Peptic ulcers                    | Parallel  | Onsite computer        | Double                                 | No                   | 279             | 263 |
| Bardhan 1986                            | 40 mg vs 300 mg    | w1013 | Peptic ulcers                    | Parallel  | Unspecified method     | Double                                 | Yes                  | 36              | 35  |
| Di Mario 1993 A                         | 40 mg vs 300 mg    | w994  | Peptic ulcers                    | Parallel  | Unspecified method     | Unknown                                | Yes                  | 12              | 23  |
| Pare 1990                               | 40 mg vs 300 mg    | w1023 | Peptic ulcers                    | Parallel  | Unspecified method     | Double                                 | Yes                  | 38              | 41  |
| Tulassay 1992                           | 40 mg vs 300 mg    | w1036 | Peptic ulcers                    | Parallel  | Unspecified method     | Unknown                                | Yes                  | 22              | 23  |
| Michopoulos 2000                        | 40 mg vs 600 mg    | w1037 | Peptic ulcers                    | Parallel  | Unspecified method     | Open                                   | No                   | 78              | 78  |
| Pellegrini 2005 U                       | 40 mg vs 600 mg    | w909  | Peptic ulcers                    | Parallel  | Other method           | Open                                   | Yes                  | 27              | 28  |
| Cooperative Study 1990 (gastric ulcer)  | 40 mg vs 300 mg    | w1038 | Peptic ulcers                    | Parallel  | Unspecified method     | Double                                 | Yes                  | 21              | 25  |
| Cooperative Study 1990 (duodenal ulcer) | 40 mg vs 300 mg    | w1038 | Peptic ulcers                    | Parallel  | Unspecified method     | Double                                 | Yes                  | 96              | 98  |
| <b>Omeprazole vs Nizatidine</b>         |                    |       |                                  |           |                        |                                        |                      |                 |     |
| Russo 1994                              | 20 mg vs 600 mg    | w1039 | Peptic ulcers                    | Parallel  | Unspecified method     | Open                                   | Yes                  | 15              | 16  |
| Brummer 1996                            | 20 mg vs 300 mg    | w1040 | Peptic ulcers                    | Parallel  | Unspecified method     | Open                                   | Yes                  | 11              | 12  |
| Di Mario 1993 A                         | 40 mg vs 300 mg    | w994  | Peptic ulcers                    | Parallel  | Unspecified method     | Unknown                                | Yes                  | 12              | 12  |
| <b>Other PPI vs Famotidine</b>          |                    |       |                                  |           |                        |                                        |                      |                 |     |
| Nakashima 2009                          | Unknown vs 40 mg   | w1041 | Peptic ulcers                    | Parallel  | Unspecified method     | Unknown                                | Yes                  | 20              | 20  |
| <b>Other PPI vs other H2RA</b>          |                    |       |                                  |           |                        |                                        |                      |                 |     |
| Sasaki 1999                             | Unknown vs Unknown | w1042 | Peptic ulcers                    | Parallel  | Unspecified method     | Open                                   | Yes                  | 116             | 196 |
| Noh 2013                                | Unknown vs Unknown | w1043 | Endoscopic submucosal dissection | Parallel  | Unspecified method     | Unknown                                | No                   | 92              | 98  |
| Kang 2011                               | Unknown vs Unknown | w1044 | Endoscopic submucosal dissection | Parallel  | Unspecified method     | Unknown                                | No                   | -               | -   |
| <b>Pantoprazole vs Famotidine</b>       |                    |       |                                  |           |                        |                                        |                      |                 |     |
| Jeon 2010                               | 40 mg vs 40 mg     | w1045 | Endoscopic submucosal dissection | Parallel  | Unspecified method     | Unknown                                | No                   | 11              | 13  |
| Oh 2010                                 | 40 mg vs 40 mg     | w1046 | Endoscopic submucosal dissection | Parallel  | Unspecified method     | Unknown                                | No                   | 31              | 31  |
| Seo 2011                                | 40 mg vs 40 mg     | w1047 | Endoscopic submucosal dissection | Parallel  | Unspecified method     | Unknown                                | No                   | 74              | 74  |
| <b>Pantoprazole vs Ranitidine</b>       |                    |       |                                  |           |                        |                                        |                      |                 |     |
| Papp 1997                               | 40 mg vs 300 mg    | w1048 | Peptic ulcers                    | Parallel  | Unspecified method     | Double                                 | Yes                  | 160             | 166 |
| Schepp 1995                             | 40 mg vs 300 mg    | w1049 | Peptic ulcers                    | Parallel  | Unspecified method     | Double                                 | Yes                  | 177             | 89  |
| Cremer 1995                             | 40 mg vs 300 mg    | w1050 | Peptic ulcers                    | Parallel  | Unspecified method     | Double                                 | Yes                  | 137             | 139 |
| Chen 1999                               | 40 mg vs 300 mg    | w1051 | Peptic ulcers                    | Parallel  | Unspecified method     | Double                                 | Yes                  | 80              | 80  |
| Meneghelli 2000                         | 40 mg vs 300 mg    | w1052 | Peptic ulcers                    | Parallel  | Unspecified method     | Double                                 | Yes                  | 111             | 111 |
| Judmaier 1994                           | 40 mg vs 300 mg    | w1053 | Peptic ulcers                    | Parallel  | Unspecified method     | Double                                 | Yes                  | 98              | 104 |
| Fric 1996                               | 40 mg vs 300 mg    | w1054 | Peptic ulcers                    | Parallel  | Unspecified method     | Double                                 | Yes                  | 47              | 48  |
| Hotz 1995 A                             | 40 mg vs 300 mg    | w1055 | Peptic ulcers                    | Parallel  | Unspecified method     | Double                                 | Yes                  | 166             | 82  |
| van Rensburg 1994                       | 40 mg vs 300 mg    | w1056 | Peptic ulcers                    | Parallel  | Closed list            | Double                                 | Yes                  | 102             | 97  |
| Dibildox 1996                           | 40 mg vs 300 mg    | w1057 | Peptic ulcers                    | Parallel  | Unspecified method     | Double                                 | Yes                  | 89              | 89  |
| <b>Rabeprazole vs other H2RA</b>        |                    |       |                                  |           |                        |                                        |                      |                 |     |
| Saigenji 2002                           | 10 mg vs Unknown   | w1058 | Peptic ulcers                    | Parallel  | Unspecified method     | Open                                   | Yes                  | 77              | 76  |
| <b>Rabeprazole vs Ranitidine</b>        |                    |       |                                  |           |                        |                                        |                      |                 |     |
| Breiter 2000                            | 20 mg vs 300 mg    | w1059 | Peptic ulcers                    | Parallel  | Unspecified method     | Double                                 | Yes                  | 188             | 188 |

**Webtable 5 (cont.): Details of trials involving a randomised comparison of a proton pump inhibitor (X) versus histamine-2 receptor antagonist (Y)**

| Trial name                        | Regimen            | Ref.  | Indication for treatment         | Design   | Allocation Concealment | Blinding of investigators and patients | Availability of data | No. of patients |     |
|-----------------------------------|--------------------|-------|----------------------------------|----------|------------------------|----------------------------------------|----------------------|-----------------|-----|
|                                   |                    |       |                                  |          |                        |                                        |                      | NX              | NY  |
| <b>Rabeprazole vs Roxatidine</b>  |                    |       |                                  |          |                        |                                        |                      |                 |     |
| Takeuchi 2011                     | 10 mg vs 150 mg    | w1060 | Endoscopic submucosal dissection | Parallel | Sealed envelopes       | Unknown                                | No                   | 30              | 30  |
| <b>Acute Bleeding Trials</b>      |                    |       |                                  |          |                        |                                        |                      |                 |     |
| <b>Esomeprazole vs Cimetidine</b> |                    |       |                                  |          |                        |                                        |                      |                 |     |
| Bai 2015                          | 192 mg vs 1440 mg  | w1061 | Bleeding Peptic Ulcer            | Parallel | Closed list            | Double                                 | Yes                  | 111             | 111 |
| <b>Lansoprazole vs Roxatidine</b> |                    |       |                                  |          |                        |                                        |                      |                 |     |
| Ashida 2007                       | 60 mg vs 150 mg    | w1062 | UGI bleeding of any cause        | Parallel | Unspecified method     | Double                                 | Yes                  | 135             | 135 |
| <b>Omeprazole vs Cimetidine</b>   |                    |       |                                  |          |                        |                                        |                      |                 |     |
| Chua 1996                         | 40 mg vs 1200 mg   | w1063 | Bleeding Peptic Ulcer            | Parallel | Sealed envelopes       | Unknown                                | Yes                  | 10              | 10  |
| Chua 1996                         | 80 mg vs 1200 mg   | w1063 | Bleeding Peptic Ulcer            | Parallel | Sealed envelopes       | Unknown                                | Yes                  | 10              | 10  |
| Lin 2006                          | 80 mg vs 800 mg    | w1064 | Bleeding Peptic Ulcer            | Parallel | Sealed envelopes       | Open                                   | Yes                  | 66              | 67  |
| Lin 2006                          | 160 mg vs 800 mg   | w1064 | Bleeding Peptic Ulcer            | Parallel | Sealed envelopes       | Open                                   | Yes                  | 67              | 67  |
| Lin 1998                          | 160 mg vs 1200 mg  | w1065 | Bleeding Peptic Ulcer            | Parallel | Sealed envelopes       | Unknown                                | Yes                  | 50              | 50  |
| <b>Omeprazole vs Ranitidine</b>   |                    |       |                                  |          |                        |                                        |                      |                 |     |
| Fasseas 2001                      | 40 mg vs 200 mg    | w1066 | Bleeding Peptic Ulcer            | Parallel | Unspecified method     | Single                                 | Yes                  | 45              | 47  |
| Artal 1996                        | 79.2 mg vs 300 mg  | w1067 | Bleeding Peptic Ulcer            | Parallel | Unspecified method     | Unknown                                | No                   | -               | -   |
| Artal 1996                        | 79.2 mg vs 300 mg  | w1067 | Bleeding Peptic Ulcer            | Parallel | Unspecified method     | Unknown                                | No                   | -               | -   |
| Lanas 1995                        | 80 mg vs 300 mg    | w1068 | Bleeding Peptic Ulcer            | Parallel | Unspecified method     | Open                                   | Yes                  | 28              | 23  |
| Sheu 2002                         | 80 mg vs 150 mg    | w1069 | Bleeding Peptic Ulcer            | Parallel | Unspecified method     | Unknown                                | Yes                  | 86              | 89  |
| Cardi 1997                        | 80 mg vs 400 mg    | w1070 | Bleeding Peptic Ulcer            | Parallel | Sealed envelopes       | Double                                 | Yes                  | 21              | 24  |
| Coraggio 1998                     | 80 mg vs 200 mg    | w1071 | Bleeding Peptic Ulcer            | Parallel | Unspecified method     | Unknown                                | Yes                  | 24              | 24  |
| Artal 1996                        | 80 mg vs 300 mg    | w1067 | Bleeding Peptic Ulcer            | Parallel | Unspecified method     | Unknown                                | No                   | -               | -   |
| Artal 1996                        | 80 mg vs 300 mg    | w1067 | Bleeding Peptic Ulcer            | Parallel | Unspecified method     | Unknown                                | No                   | -               | -   |
| Orti 1995                         | 96 mg vs 200 mg    | w1072 | Bleeding Peptic Ulcer            | Parallel | Unspecified method     | Open                                   | Yes                  | 267             | 252 |
| Villanueva 1995                   | 120 mg vs 200 mg   | w1073 | Bleeding Peptic Ulcer            | Parallel | Sealed envelopes       | Unknown                                | Yes                  | 48              | 48  |
| Artal 1996                        | 120 mg vs 300 mg   | w1067 | Bleeding Peptic Ulcer            | Parallel | Unspecified method     | Unknown                                | No                   | -               | -   |
| Artal 1996                        | 120 mg vs 300 mg   | w1067 | Bleeding Peptic Ulcer            | Parallel | Unspecified method     | Unknown                                | No                   | -               | -   |
| Labenz 1997 A                     | 272 mg vs 530 mg   | w1074 | Bleeding Peptic Ulcer            | Parallel | Sealed envelopes       | Unknown                                | Yes                  | 20              | 20  |
| <b>Pantoprazole vs Ranitidine</b> |                    |       |                                  |          |                        |                                        |                      |                 |     |
| Hsu 2004                          | 80 mg vs 150 mg    | w1075 | Bleeding Peptic Ulcer            | Parallel | Sealed envelopes       | Unknown                                | Yes                  | 52              | 50  |
| van Rensburg 2009                 | 192 mg vs 312 mg   | w1076 | Bleeding Peptic Ulcer            | Parallel | Other method           | Double                                 | Yes                  | 625             | 631 |
| Jensen 2006                       | 192 mg vs 150 mg   | w1077 | Bleeding Peptic Ulcer            | Parallel | Onsite computer        | Double                                 | Yes                  | 72              | 77  |
| Gashi 2012                        | Unknown vs Unknown | w1078 | Bleeding Peptic Ulcer            | Parallel | Unspecified method     | Double                                 | No                   | 60              | 62  |

Design: Parallel=parallel trial. Factorial=Factorial trial. 'Extension' studies are studies in which patients are randomised more than once during the trial (only the parts of the trial that involve a valid randomised comparison for this meta-analysis, labelled X1, X2 etc., are shown in this table). Data shown for crossover trials reflect only events during the first phase of the trial. The suffixes A, B, C, D are used to distinguish different trials published by the same author in the same year.

Allocation concealment: IVRS (Interactive Voice Response System); Telephone (telephone central office); Pharmacy (pharmacy coded containers administered sequentially); Onsite computer (onsite computer accessible only after entering patient details); Sealed envelopes (sequentially numbered, opaque or without further specification); Closed list (closed list of random numbers); Other (other specified method); Unspecified (stated as being 'randomised' but with no other details).

Blinding of investigators and patients: Single=single-blind; Double=double-blind; Open=open label.

Availability of data: Data available for at least one endpoint of interest in the meta-analyses.

In cases where the number randomised was not reported, the number evaluated was used instead. In addition, for crossover trials, where neither the number randomised nor the number evaluated was reported, the total number of participants divided by number of arms was used.

**Webtable 6: Details of trials involving a randomised comparison of a histamine-2 receptor antagonist (X) versus a prostaglandin analogue (Y)**

| Trial name                       | Regimen           | Ref.  | Indication for treatment                          | Design    | Allocation Concealment | Blinding of investigators and patients | Availability of data | No. of patients |     |
|----------------------------------|-------------------|-------|---------------------------------------------------|-----------|------------------------|----------------------------------------|----------------------|-----------------|-----|
|                                  |                   |       |                                                   |           |                        |                                        |                      | NX              | NY  |
| <b>Prevention Trials</b>         |                   |       |                                                   |           |                        |                                        |                      |                 |     |
| <i>Famotidine vs Misoprostol</i> |                   |       |                                                   |           |                        |                                        |                      |                 |     |
| Yildiz 1996                      | 40 mg vs 400 ug   | w1079 | Antiplatelet therapy                              | Parallel  | Unspecified method     | Unknown                                | No                   | 16              | 16  |
| <i>Famotidine vs Rebamipide</i>  |                   |       |                                                   |           |                        |                                        |                      |                 |     |
| FORCE                            | 20 mg vs 300 mg   | w1080 | Antiplatelet therapy                              | Parallel  | Unspecified method     | Single                                 | Yes                  | 66              | 63  |
| <i>Ranitidine vs Enprostil</i>   |                   |       |                                                   |           |                        |                                        |                      |                 |     |
| Lauritsen 1987                   | 150 mg vs 35 ug   | w1081 | Recently healed ulcers                            | Parallel  | Closed list            | Double                                 | Yes                  | 71              | 71  |
| Bardhan 1989                     | 150 mg vs 35 ug   | w1082 | Recently healed ulcers                            | Parallel  | Unspecified method     | Single                                 | Yes                  | 64              | 64  |
| Heijerman 1990                   | 300 mg vs 70 ug   | w1083 | Cystic fibrosis                                   | Crossover | Unspecified method     | Double                                 | No                   | 4               | 4   |
| <i>Ranitidine vs Misoprostol</i> |                   |       |                                                   |           |                        |                                        |                      |                 |     |
| Goldin 1991                      | 150 mg vs 400 ug  | w278  | Recently healed ulcers                            | Parallel  | Closed list            | Double                                 | Yes                  | 24              | 25  |
| Raskin 1996                      | 300 mg vs 800 ug  | w1084 | Arthritis, rheumatic or musculoskeletal disorders | Parallel  | Unspecified method     | Double                                 | Yes                  | 269             | 269 |
| Valentini 1995                   | 300 mg vs 400 ug  | w1085 | Cancer pain                                       | Parallel  | Unspecified method     | Unknown                                | Yes                  | 31              | 30  |
| Bianchi Porro 1997               | 300 mg vs 600 ug  | w1086 | Arthritis, rheumatic or musculoskeletal disorders | Parallel  | Closed list            | Double                                 | Yes                  | 24              | 23  |
| Bianchi Porro 1997               | 300 mg vs 400 ug  | w1086 | Arthritis, rheumatic or musculoskeletal disorders | Parallel  | Closed list            | Double                                 | Yes                  | 24              | 23  |
| <i>Ranitidine vs Rioprostil</i>  |                   |       |                                                   |           |                        |                                        |                      |                 |     |
| Rampal 1989                      | 150 mg vs 300 ug  | w1087 | Recently healed ulcers                            | Parallel  | Unspecified method     | Double                                 | No                   | 95              | 95  |
| Businger 1989 B                  | 150 mg vs 600 ug  | w1088 | Recently healed ulcers                            | Parallel  | Unspecified method     | Double                                 | Yes                  | 110             | 97  |
| <i>Roxatidine vs Misoprostol</i> |                   |       |                                                   |           |                        |                                        |                      |                 |     |
| Müller 1994 B                    | 150 mg vs 400 ug  | w653  | Healthy volunteers                                | Parallel  | Unspecified method     | Single                                 | Yes                  | 12              | 12  |
| <b>Healing Trials</b>            |                   |       |                                                   |           |                        |                                        |                      |                 |     |
| <i>Cimetidine vs Enprostil</i>   |                   |       |                                                   |           |                        |                                        |                      |                 |     |
| Frexinos 1989                    | 800 mg vs 70 ug   | w1089 | Peptic ulcers                                     | Parallel  | Closed list            | Double                                 | Yes                  | 39              | 41  |
| Winters 1986                     | 800 mg vs 70 ug   | w1090 | Peptic ulcers                                     | Parallel  | Other method           | Double                                 | Yes                  | 181             | 188 |
| Jazrawi 1988                     | 800 mg vs 70 ug   | w1091 | Peptic ulcers                                     | Parallel  | Unspecified method     | Double                                 | Yes                  | 59              | 61  |
| Carling 1987                     | 800 mg vs 70 mg   | w1092 | Peptic ulcers                                     | Parallel  | Unspecified method     | Double                                 | Yes                  | 52              | 54  |
| Unge 1989 A                      | 1000 mg vs 70 ug  | w1093 | Peptic ulcers                                     | Parallel  | Unspecified method     | Double                                 | Yes                  | 24              | 28  |
| Villalobos 1987                  | 1200 mg vs 70 ug  | w1094 | Peptic ulcers                                     | Parallel  | Closed list            | Single                                 | Yes                  | 19              | 21  |
| <i>Cimetidine vs Misoprostol</i> |                   |       |                                                   |           |                        |                                        |                      |                 |     |
| Wang 1991                        | 800 mg vs 800 ug  | w1095 | Peptic ulcers                                     | Parallel  | Unspecified method     | Double                                 | Yes                  | 106             | 94  |
| Dajani 1992                      | 800 mg vs 800 ug  | w1096 | Peptic ulcers                                     | Parallel  | Unspecified method     | Double                                 | Yes                  | 106             | 94  |
| Aenishänslin 1985                | 1200 mg vs 200 ug | w1097 | Peptic ulcers                                     | Parallel  | Unspecified method     | Double                                 | Yes                  | 39              | 38  |
| Aenishänslin 1985                | 1200 mg vs 800 ug | w1097 | Peptic ulcers                                     | Parallel  | Unspecified method     | Double                                 | Yes                  | 39              | 38  |
| Rachmilewitz 1986                | 1200 mg vs 200 ug | w1098 | Peptic ulcers                                     | Parallel  | Closed list            | Double                                 | Yes                  | 208             | 166 |
| Rachmilewitz 1986                | 1200 mg vs 800 ug | w1098 | Peptic ulcers                                     | Parallel  | Closed list            | Double                                 | Yes                  | 208             | 208 |
| Nicholson 1985                   | 1200 mg vs 200 ug | w1099 | Peptic ulcers                                     | Parallel  | Closed list            | Double                                 | Yes                  | 240             | 228 |
| Nicholson 1985                   | 1200 mg vs 800 ug | w1099 | Peptic ulcers                                     | Parallel  | Closed list            | Double                                 | Yes                  | 240             | 235 |
| Baccaro 1987                     | 1200 mg vs 800 ug | w1100 | Peptic ulcers                                     | Parallel  | Other method           | Double                                 | Yes                  | 45              | 54  |
| Fich 1985 B                      | 1200 mg vs 800 ug | w1101 | Peptic ulcers                                     | Parallel  | Closed list            | Double                                 | Yes                  | 11              | 11  |
| Fich 1985 B                      | 1200 mg vs 200 ug | w1101 | Peptic ulcers                                     | Parallel  | Closed list            | Double                                 | Yes                  | 11              | 10  |
| Fich 1985 A                      | 1200 mg vs 800 ug | w1102 | Peptic ulcers                                     | Parallel  | Closed list            | Double                                 | Yes                  | 24              | 24  |
| Fich 1985 A                      | 1200 mg vs 200 ug | w1102 | Peptic ulcers                                     | Parallel  | Closed list            | Double                                 | Yes                  | 24              | 23  |
| Petersen 1987                    | 1200 mg vs 800 ug | w1103 | Peptic ulcers                                     | Parallel  | Unspecified method     | Double                                 | Yes                  | 21              | 22  |
| O'Keefe 1985                     | 1200 mg vs 200 ug | w1104 | Peptic ulcers                                     | Parallel  | Unspecified method     | Double                                 | Yes                  | 22              | 22  |
| O'Keefe 1985                     | 1200 mg vs 800 ug | w1104 | Peptic ulcers                                     | Parallel  | Unspecified method     | Double                                 | Yes                  | 22              | 22  |
| <i>Cimetidine vs Rioprostil</i>  |                   |       |                                                   |           |                        |                                        |                      |                 |     |
| Bianchi Porro 1989               | 800 mg vs 600 ug  | w1105 | Peptic ulcers                                     | Parallel  | Unspecified method     | Double                                 | Yes                  | 127             | 130 |
| <i>Famotidine vs Rebamipide</i>  |                   |       |                                                   |           |                        |                                        |                      |                 |     |
| Nakamura 1995                    | 40 mg vs 900 mg   | w819  | Peptic ulcers                                     | Parallel  | Unspecified method     | Unknown                                | Yes                  | 5               | 5   |

**Webtable 6 (cont.): Details of trials involving a randomised comparison of a histamine-2 receptor antagonist (X) versus prostaglandin analogue (Y)**

| Trial name                              | Regimen          | Ref.  | Indication for treatment     | Design   | Allocation Concealment | Blinding of investigators and patients | Availability of data | No. of patients |     |
|-----------------------------------------|------------------|-------|------------------------------|----------|------------------------|----------------------------------------|----------------------|-----------------|-----|
|                                         |                  |       |                              |          |                        |                                        |                      | NX              | NY  |
| Kim 2010                                | 40 mg vs 300 mg  | w1106 | Endoscopic mucosal resection | Parallel | Unspecified method     | Unknown                                | Yes                  | 31              | 32  |
| <b><i>Ranitidine vs Enprostil</i></b>   |                  |       |                              |          |                        |                                        |                      |                 |     |
| Lartigue 1994                           | 300 mg vs 70 ug  | w1107 | Peptic ulcers                | Parallel | Unspecified method     | Double                                 | Yes                  | 318             | 324 |
| Bianchi Porro 1992 A                    | 300 mg vs 70 ug  | w1108 | Peptic ulcers                | Parallel | Unspecified method     | Double                                 | Yes                  | 22              | 21  |
| Bunce 1986                              | 300 mg vs 70 ug  | w1109 | Peptic ulcers                | Parallel | Unspecified method     | Double                                 | No                   | 10              | 7   |
| Bardhan 1988 B                          | 300 mg vs 70 ug  | w1110 | Peptic ulcers                | Parallel | Unspecified method     | Double                                 | Yes                  | 155             | 158 |
| Bardhan 1991                            | 300 mg vs 70 ug  | w1111 | Peptic ulcers                | Parallel | Unspecified method     | Double                                 | Yes                  | 85              | 71  |
| Dammann 1986 A                          | 300 mg vs 70 ug  | w1112 | Peptic ulcers                | Parallel | Other method           | Double                                 | Yes                  | 46              | 47  |
| Morgan 1990                             | 300 mg vs 140 ug | w1113 | Peptic ulcers                | Parallel | Closed list            | Double                                 | Yes                  | 49              | 47  |
| Mackinnon 1987                          | 300 mg vs 70 ug  | w1114 | Peptic ulcers                | Parallel | Unspecified method     | Double                                 | Yes                  | 75              | 67  |
| Lauritsen 1986                          | 300 mg vs 70 ug  | w1115 | Peptic ulcers                | Parallel | Unspecified method     | Double                                 | Yes                  | 90              | 90  |
| <b><i>Ranitidine vs Misoprostol</i></b> |                  |       |                              |          |                        |                                        |                      |                 |     |
| Goldin 1988                             | 300 mg vs 800 ug | w1116 | Peptic ulcers                | Parallel | Other method           | Double                                 | Yes                  | 34              | 37  |
| Simjee 1987                             | 300 mg vs 800 ug | w1117 | Peptic ulcers                | Parallel | Unspecified method     | Double                                 | Yes                  | 30              | 30  |
| Gonvers 1987                            | 300 mg vs 800 ug | w1118 | Peptic ulcers                | Parallel | Unspecified method     | Double                                 | Yes                  | 42              | 45  |
| <b><i>Ranitidine vs Rioprostil</i></b>  |                  |       |                              |          |                        |                                        |                      |                 |     |
| Lavignolle 1989                         | 300 mg vs 600 ug | w1119 | Peptic ulcers                | Parallel | Unspecified method     | Double                                 | Yes                  | 80              | 76  |
| Lauritsen 1989 A                        | 300 mg vs 200 ug | w1120 | Peptic ulcers                | Parallel | Closed list            | Double                                 | Yes                  | 30              | 30  |
| Dammann 1989                            | 300 mg vs 600 ug | w1121 | Peptic ulcers                | Parallel | Unspecified method     | Double                                 | Yes                  | 107             | 105 |
| Quinton 1989                            | 300 mg vs 600 ug | w1122 | Peptic ulcers                | Parallel | Other method           | Double                                 | Yes                  | 48              | 43  |
| Dammann 1987 A                          | 300 mg vs 600 ug | w1123 | Peptic ulcers                | Parallel | Unspecified method     | Double                                 | Yes                  | 104             | 104 |
| Coremans 1989                           | 300 mg vs 600 ug | w1124 | Peptic ulcers                | Parallel | Unspecified method     | Double                                 | Yes                  | 153             | 157 |
| Businger 1989 A                         | 300 mg vs 600 ug | w1125 | Peptic ulcers                | Parallel | Unspecified method     | Double                                 | Yes                  | 119             | 118 |
| Rutgeerts 1989                          | 300 mg vs 600 ug | w1126 | Peptic ulcers                | Parallel | Closed list            | Double                                 | Yes                  | 100             | 94  |

Data shown for crossover trials reflect only events during the first phase of the trial. The suffixes A, B are used to distinguish different trials published by the same author in the same year.

Allocation concealment: IVRS (Interactive Voice Response System); Telephone (telephone central office); Pharmacy (pharmacy coded containers administered sequentially); Onsite computer (onsite computer accessible only after entering patient details); Sealed envelopes (sequentially numbered, opaque or without further specification); Closed list (closed list of random numbers); Other (other specified method); Unspecified (stated as being 'randomised' but with no other details).

Blinding of investigators and patients: Single=single-blind; Double=double-blind; Open=open label.

Availability of data: Data available for at least one endpoint of interest in the meta-analyses.

In cases where the number randomised was not reported, the number evaluated was used instead. In addition, for crossover trials, where neither the number randomised nor the number evaluated was reported, the total number of participants divided by number of arms was used.



**Webtable 7: Details of trials involving a randomised comparison of combinations of gastroprotectants**

| Trial name                                               | Regimen            | Ref.  | Indication for treatment         | Design    | Allocation Concealment | Blinding of investigators and patients | Availability of data | No. of patients |    |
|----------------------------------------------------------|--------------------|-------|----------------------------------|-----------|------------------------|----------------------------------------|----------------------|-----------------|----|
|                                                          |                    |       |                                  |           |                        |                                        |                      | NX              | NY |
| <b>Prevention Trials</b>                                 |                    |       |                                  |           |                        |                                        |                      |                 |    |
| <i>Misoprostol + Ranitidine vs Ranitidine</i>            |                    |       |                                  |           |                        |                                        |                      |                 |    |
| Yang 1996                                                | 800 ug vs Unknown  | w1127 | Renal transplant                 | Parallel  | Unspecified method     | Open                                   | Yes                  | 25              | 28 |
| <i>Rebamipide + Lansoprazole vs Lansoprazole</i>         |                    |       |                                  |           |                        |                                        |                      |                 |    |
| Yoshida 2010                                             | 900 mg vs 0        | w1128 | Gastro-oesophageal reflux        | Parallel  | Unspecified method     | Open                                   | Yes                  | 20              | 21 |
| <i>Rebamipide + Omeprazole vs Omeprazole</i>             |                    |       |                                  |           |                        |                                        |                      |                 |    |
| Mizukami 2011                                            | 300 mg vs Unknown  | w1129 | Healthy volunteers               | Crossover | Pharmacy               | Double                                 | Yes                  | 6               | 6  |
| <b>Healing Trials</b>                                    |                    |       |                                  |           |                        |                                        |                      |                 |    |
| <i>Enprostil + Cimetidine vs Cimetidine</i>              |                    |       |                                  |           |                        |                                        |                      |                 |    |
| Murata 2005                                              | 50 ug vs Unknown   | w1130 | Peptic ulcers                    | Parallel  | Sealed envelopes       | Unknown                                | Yes                  | 85              | 86 |
| <i>Rebamipide + Lansoprazole vs Lansoprazole</i>         |                    |       |                                  |           |                        |                                        |                      |                 |    |
| Saita 1996                                               | 300 mg vs Unknown  | w1131 | Peptic ulcers                    | Parallel  | Unspecified method     | Unknown                                | No                   | 33              | 27 |
| <i>Rebamipide + Other PPI vs Rebamipide + Other H2RA</i> |                    |       |                                  |           |                        |                                        |                      |                 |    |
| Jang 2012                                                | Unknown vs Unknown | w1132 | Endoscopic submucosal dissection | Parallel  | Unspecified method     | Unknown                                | No                   | 40              | 37 |
| <i>Rebamipide + Other PPI vs Other PPI</i>               |                    |       |                                  |           |                        |                                        |                      |                 |    |
| Araki 2012                                               | 300 mg vs Unknown  | w1133 | Endoscopic submucosal dissection | Parallel  | Unspecified method     | Unknown                                | Yes                  | 51              | 49 |
| Kobayashi 2012                                           | 300 mg vs Unknown  | w1134 | Endoscopic submucosal dissection | Parallel  | Closed list            | Unknown                                | Yes                  | 85              | 85 |
| Jang 2012                                                | Unknown vs Unknown | w1132 | Endoscopic submucosal dissection | Parallel  | Unspecified method     | Unknown                                | No                   | 40              | 44 |
| <b>Acute Bleeding Trials</b>                             |                    |       |                                  |           |                        |                                        |                      |                 |    |
| <i>Misoprostol + Other PPI vs Other PPI</i>              |                    |       |                                  |           |                        |                                        |                      |                 |    |
| Yilmaz 2007                                              | 600 ug vs Unknown  | w1135 | UGI bleeding of any cause        | Parallel  | Unspecified method     | Unknown                                | Yes                  | 56              | 67 |

Design: Data shown for crossover trials reflect only events during the first phase of the trial.

Allocation concealment: IVRS (Interactive Voice Response System); Telephone (telephone central office); Pharmacy (pharmacy coded containers administered sequentially); Onsite computer (onsite computer accessible only after entering patient details); Sealed envelopes (sequentially numbered, opaque or without further specification); Closed list (closed list of random numbers); Other (other specified method); Unspecified (stated as being 'randomised' but with no other details).

Blinding of investigators and patients: Double=double-blind; Open=open label.

Availability of data: Data available for at least one endpoint of interest in the meta-analyses.

In cases where the number randomised was not reported, the number evaluated was used instead. In addition, for crossover trials, where neither the number randomised nor the number evaluated was reported, the total number of participants divided by number of arms was used.

## References for trials listed in Webtables 1-7

- w1** Metz DC et al. Clinical trial: dexlansoprazole MR, a proton pump inhibitor with dual delayed-release technology, effectively controls symptoms and prevents relapse in patients with healed erosive oesophagitis. *Aliment Pharm Therap* 2009;29(7):742-54.
- w2** Fass R et al. The effect of dexlansoprazole MR on nocturnal heartburn and GERD-related sleep disturbances in patients with symptomatic GERD. *Am J Gastroenterology* 2011;106(3):421-31.
- w3** Howden CW et al. Clinical trial: efficacy and safety of dexlansoprazole MR 60 and 90mg in healed erosive oesophagitis - maintenance of healing and symptom relief. *Aliment Pharm Therap* 2009;30(9):895-907.
- w4** Johnson DA et al. Esomeprazole once daily for 6m is effective therapy for maintaining healed erosive esophagitis and for controlling GERD symptoms: randomized, double-blind, placebo-controlled study of efficacy and safety. *Am J Gast* 2001;96(1):27-34.
- w5** Vakil N et al. The new proton pump inhibitor esomeprazole is effective as a maintenance therapy in GERD patients with healed erosive oesophagitis: a 6-month, randomized, double-blind, placebo-controlled study of efficacy and safety. *Aliment Pharm Therap* 2001;15(7):927-35.
- w6** Scheiman JM et al. Prevention of ulcers by esomeprazole in at-risk patients using non-selective NSAIDs and COX-2 inhibitors. *Am J Gastroenterol* 2006;101(4):701-10.
- w7** Yeomans N et al. Efficacy of esomeprazole (20 mg once daily) for reducing the risk of gastroduodenal ulcers associated with continuous use of low-dose aspirin. *Am J Gastroenterol* 2008;103(10):2465-73.
- w8** Hawkey C et al. Improvements with esomeprazole in patients with upper gastrointestinal symptoms taking non-steroidal anti-inflammatory drugs, including selective COX-2 inhibitors. *Am J Gastroenterol* 2005;100(5):1028-36.
- w9** Johnson DA et al. Effect of esomeprazole on nighttime heartburn and sleep quality in patients with GERD: A randomized, placebo-controlled trial. *Am J Gastroenterol* 2005;100(9):1914-22.
- w10** Hawkey CJ et al. Maintenance treatment with esomeprazole following initial relief of non-steroidal anti-inflammatory drug-associated upper gastrointestinal symptoms: the NASA2 and SPACE2 studies. *Arthritis Res Ther* 2007;9(1):17.
- w11** Katz PO et al. Esomeprazole resolves chronic heartburn in patients without erosive oesophagitis. *Aliment Pharm Therap* 2003;18(9):875-82.
- w12** Cheung CK et al. The effect of proton pump inhibitor (PPI) on plasma 5-hydroxytryptamine (5-HT) levels in patients with functional dyspepsia (FD): A double-blind randomized control trial. *Gastroenterology*. 2013;1:S679.
- w13** Hsu PI et al. Esomeprazole prevents recurrent peptic ulcers in clopidogrel users with ulcer history. *Gastroenterology* 2010;118:S20.
- w14** Yu L et al. Prevention effect of PPIs on induced gastrointestinal injury in CHD patients. *J Gastroen Hepatol*. 2013;28:13.
- w15** Tan VP et al. Treatment of non-erosive reflux disease with a proton pump inhibitor in Chinese patients: a randomized controlled trial. *Gastroenterology* 2011;46(7):906-12.
- w16** Sugano K et al. Randomised clinical trial: esomeprazole for the prevention of nonsteroidal anti-inflammatory drug-related peptic ulcers in Japanese patients. *Aliment Pharm Therap* 2012;36(2):115-25.
- w17** Hsu PI. Proton pump inhibitor prevents clinically significant upper gastrointestinal events in clopidogrel users with ulcer history. *Gastroenterology* 2012;142:S27 (114).
- w18** Sugano K et al. Multinational, double-blind, randomised, placebo-controlled, prospective study of esomeprazole in the prevention of recurrent peptic ulcer in low-dose acetylsalicylic acid users: the LAVENDER study. *Gut* 2014;63(7):1061-8.
- w19** Peura DA et al. Esomeprazole treatment of frequent heartburn: two randomized, double-blind, placebo-controlled trials. *Postgraduate Medicine* 2014;126(4):33-41.
- w20** Pilichiewicz AN et al. Symptoms and disease burden in patients with functional dyspepsia: An observational 12 month follow-up. *J Gastroen Hepatol* 2012;27:133-4.
- w21** Hsu PI et al. Esomeprazole with clopidogrel reduces peptic ulcer recurrence, compared with clopidogrel alone, in patients with atherosclerosis. *Gastroenterology* 2011;140(3):791-8.
- w22** Faruqi S et al. Chronic cough and esomeprazole: a double-blind placebo-controlled parallel study. *Respirology*. 2011;16(7):1150-6.
- w23** Scheiman JM et al. Prevention of peptic ulcers with esomeprazole in patients at risk of ulcer development treated with low-dose acetylsalicylic acid: a randomised, controlled trial (OBERON). *Heart*. 2011;97(10):797-802.
- w24** Johnson D et al. Clinical trial: esomeprazole for moderate-to-severe nighttime heartburn and gastro-oesophageal reflux disease-related sleep disturbances. *Aliment Pharm Therap* 2010;32(2):182-90.
- w25** Reimer C et al. Proton-pump inhibitor therapy induces acid-related symptoms in healthy volunteers after withdrawal of therapy. *Gastroenterology* 2009;137:80-7.
- w26** Wilder-Smith CH et al. Quantification of dental erosions in patients with GERD using optical coherence tomography before and after double-blind, randomized treatment with esomeprazole or placebo. *Am J Gastroenterol* 2009;104:2788-95.
- w27** Chan FK et al. Combination of a cyclo-oxygenase-2 inhibitor and a proton-pump inhibitor for prevention of recurrent ulcer bleeding in patients at very high risk: a double-blind, randomised trial. *Lancet* 2007;369(9573):1621-6.
- w28** Fass R et al. The effect of esomeprazole 20 mg twice daily on acoustic and perception parameters of the voice in laryngopharyngeal reflux. *Neurogastroent Motil* 2010;22(2):134-45.
- w29** Johnsson F et al. Symptom-relieving effect of esomeprazole 40mg daily in patients with heartburn. *Scand J Gastroenterol* 2003;38(4):347-53.
- w30** Van Zanten SV et al. Esomeprazole 40mg once a day in patients with functional dyspepsia: the randomized, placebo-controlled "ENTER" trial.[Erratum appears in *Am J Gastroenterol*. 2006 Sep;101(9):2171]. *Am J Gastroenterol* 2006;101(9):2096-106.
- w31** Reichel O et al. Double-blind, placebo-controlled trial with esomeprazole for symptoms and signs associated with laryngopharyngeal reflux. *Otolaryng Head Neck* 2008;139(3):414-20.
- w32** Talley NJ et al. Randomized-controlled trial of esomeprazole in functional dyspepsia patients with epigastric pain or burning: does a 1-week trial of acid suppression predict symptom response? *Aliment Pharm Therap* 2007;26(5):673-82.
- w33** Yi CH et al. The effect of acid suppression on sleep and cardiac autonomic regulation in GERD. *Hepato-Gastroenterol* 2008;55(86-87):1649-52.
- w34** Kiljander TO et al. Effect of esomeprazole 40mg once or twice daily on asthma: a randomized, placebo-controlled study. *Am J Resp Crit Care* 2010;181(10):1042-8.
- w35** Hove KD et al. Effects of 12 weeks' treatment with a proton pump inhibitor on insulin secretion, glucose metabolism and markers of cardiovascular risk in patients with type 2 diabetes: a randomised double-blind prospective placebo-controlled study. *Diabetologia* 2013;56(1):22-30.
- w36** Fernando H et al. Randomized double-blind placebo-controlled crossover study to determine the effects of esomeprazole on inhibition of platelet function by clopidogrel. *J Thromb Haemost* 2011;9(8):1582-9.
- w37** Liuzzo J et al. Prospective, randomized, placebo-controlled evaluation of esomeprazole in coronary artery disease patients. EPAC: esomeprazole prevention of atypical chest pains. *J Invasive Cardiol* 2011;23(6):222-6.
- w38** Meineche-Schmidt V et al. Randomised clinical trial: identification of responders to short-term treatment with esomeprazole for dyspepsia in primary care - a randomised, placebo-controlled study. *Aliment Pharm Therap* 2011;33(1):41-9.
- w39** Goldstein JL et al. Clinical trial: the incidence of NSAID-associated endoscopic gastric ulcers in patients treated with PN 400 (naproxen plus esomeprazole magnesium) vs. enteric-coated naproxen alone. *Aliment Pharm Therap* 2010;32(3):401-13.
- w40** Goldstein JL et al. Clinical trial: the incidence of NSAID-associated endoscopic gastric ulcers in patients treated with PN 400 (naproxen plus esomeprazole magnesium) vs. enteric-coated naproxen alone. *Aliment Pharm Therap*. 2010;32(3):401-13.
- w41** Andersson T et al. Effect of esomeprazole with/without acetylsalicylic acid, omeprazole and lansoprazole on pharmacokinetics and pharmacodynamics of clopidogrel in healthy volunteers. *Am J Cardiovasc Drugs* 2014;14(3):217-27.
- w42** Jiang QH et al. Efficacy of combined aluminum magnesium carbonate, esomeprazole and dexanit in treatment of gastroesophageal reflux disease in young or middle-aged patients with anxiety: An analysis of 60 cases. *World Chinese Journal of Digestology* 2013;21(23):2331-4. [Chinese]
- w43** Mastrorade JG et al. Efficacy of esomeprazole for treatment of poorly controlled asthma. *New Engl J Med* 2009;360(15):1487-99.
- w44** Vaezi MF et al. Treatment of chronic posterior laryngitis with esomeprazole. *Laryngoscope* 2006;116(2):254-60.
- w45** Kiljander TO et al. Effects of esomeprazole 40mg twice daily on asthma: a randomized placebo-controlled trial. *Am J Resp Crit Care* 2006;173(10):1091-7.
- w46** Dimango E et al. Effect of esomeprazole versus placebo on pulmonary exacerbations in cystic fibrosis. *BMC Pulm Med*. 2014;14:21.
- w47** Shaheen NJ et al. Randomised clinical trial: high-dose acid suppression for chronic cough - a double-blind, placebo-controlled study. *Aliment Pharm Therap* 2011;33(2):225-34.
- w48** Van Zanten SV et al. One-week acid suppression trial in uninvestigated dyspepsia patients with epigastric pain or burning to predict response to 8 weeks' treatment with esomeprazole: A randomized, placebo-controlled study. *Aliment Pharm Therap* 2007; 26:665-72.
- w49** Byun M et al. Efficacy of proton pump inhibitor for chronic cough caused by gastroesophageal reflux: Preliminary results of a double-blind, placebo-controlled, randomized clinical trial. *American Journal of Respiratory and Critical Care Medicine Conference: American Thoracic Society International Conference, ATS 2015*;191.
- w50** Peura DA et al. Clinical trial: Lansoprazole 15 or 30 mg once daily vs. Placebo for treatment of frequent nighttime heartburn in self-treating subjects. *Aliment Pharm Therap* 2009;30(5):459-68.
- w51** Graham DY et al. Ulcer prevention in long-term users of nonsteroidal anti-inflammatory drugs: results of a double-blind, randomized, multicenter, active- and placebo-controlled study of misoprostol vs lansoprazole. *Arch Intern Med* 2002;162(2):169-75.
- w52** Wong WM et al. Double blind, randomised, placebo controlled study of four weeks of lansoprazole for the treatment of functional dyspepsia in Chinese patients. *Gut* 2002;51(4):502-6.
- w53** Hongo M et al. Efficacy and safety of lansoprazole (AG-1749) 15 mg and 30 mg in Japanese patients with non-erosive reflux disease (NERD): A phase III multicenter, double-blind, placebo-controlled trial. *Jpn Pharmacol & Ther* 2008;36:655-71. [Japanese]
- w54** Kushner PR et al. Lansoprazole 15 mg once daily for 14 days is effective for treatment of frequent heartburn: results of 2 randomized, placebo-controlled, double-blind studies. *Postgrad Med* 2009;121(4):67-75.
- w55** Peura DA et al. Lansoprazole in the treatment of functional dyspepsia: Two double-blind, randomized, placebo-controlled trials. *Am J Med* 2004;116(11):740-8.
- w56** Sasaki T et al. A randomized, single-blind study of lansoprazole for the prevention of exacerbations of chronic obstructive pulmonary disease in older patients. *J Am Geriatr Soc* 2009;57(8):1453-7.

## References for trials listed in Webtables 1-7

- w57** Kovacs TOG et al. Double-blind comparison of lansoprazole 15 mg, lansoprazole 30 mg and placebo as maintenance therapy in patients with healed duodenal ulcers resistant to H2- receptor agonists. *Aliment Pharm Therap* 1999;13(7): 959-967.
- w58** Muller P et al. Studies on the protective effect of lansoprazole on human gastric mucosa against low-dose acetylsalicylic acid. An endoscopic controlled double-blind study. *Arzneimittel-Forsch* 1997;47(6):758-60. [German]
- w59** Earnest DL et al. A placebo-controlled dose-ranging study of lansoprazole in the management of reflux esophagitis. *Am J Gastroenterol* 1998;93(2):238-43.
- w60** Castell DO et al. Efficacy and safety of lansoprazole in the treatment of erosive reflux esophagitis. *The Lansoprazole Group. Am J Gastroenterol* 1996;91(9):1749-57.
- w61** Lanza F et al. Prevention of duodenal ulcer recurrence with 15mg lansoprazole: a double-blind placebo-controlled study. *The Lansoprazole Study Group. Digest Dis Sci* 1997;42(12):2529-36.
- w62** Kovacs TO et al. Double-blind comparison of lansoprazole 15mg, lansoprazole 30mg, and placebo in the maintenance of healed gastric ulcer. *Digest Dis Sci* 1998;43(4):779-85.
- w63** Sontag SJ et al. Lansoprazole prevents recurrence of erosive reflux esophagitis previously resistant to H2-RA therapy. *The Lansoprazole Maintenance Study Group. Am J Gastroenterol* 1996;91(9):1758-65.
- w64** Robinson M et al. Effective maintenance treatment of reflux esophagitis with low-dose lansoprazole. A randomized, double-blind, placebo-controlled trial. *Ann Intern Med* 1996;124(10):859-67.
- w65** Richter JE et al. Lansoprazole in the treatment of heartburn in patients without erosive oesophagitis. *Aliment Pharm Therap* 1999;13(6):795-804.
- w66** Russo A et al. Bedtime administration of lansoprazole does not modify its greater efficacy vs ranitidine in the acute and long-term treatment of duodenal ulcer. Results from a multicentre, randomised, double blind clinical trial. *Ital J Gastroenterol Hepatol* 1997;29(4):312-9.
- w67** Richter JE et al. Lansoprazole compared with ranitidine for the treatment of nonerosive gastroesophageal reflux disease. *Arch Intern Med* 2000;160(12):1803-9.
- w68** Suzuki H et al. Effect of lansoprazole on the Epigastric symptoms of functional dyspepsia (ELF study): A multicentre, prospective, randomized, double-blind, placebo-controlled clinical trial. *United European Gastroenterology Journal* 2013;1(6):445-52.
- w69** Petite JP et al. The effects of lansoprazole on the function of the lower esophagus function and esophageal motility in man. *Med Chir Dig* 1991;20(1):58-60. [French]
- w70** Bell N et al. Duration of effect of lansoprazole on gastric pH and acid secretion in normal male volunteers. *Aliment Pharm Therap* 2001;15(1):105-13.
- w71** Brummer RJ et al. Initial and chronic gastric acid inhibition by lansoprazole and omeprazole in relation to meal administration. *Digest Dis Sci* 1997;42(10):2132-7.
- w72** Dumper J et al. Lansoprazole in globus pharyngeus: double-blind, randomized, placebo-controlled trial. *J Otolaryngol-Head N* 2008;37(5):657-63.
- w73** Gaetani M et al. Chronic oral administration of lansoprazole does not affect the hypothalamic pituitary gonadal axis in healthy young men. *Eur J Gastroen Hepat* 1995;7(3):211-3.
- w74** Jang JY et al. Randomized prospective trial of the effect of induced hypergastrinemia on the prevention of pancreatic atrophy after pancreatoduodenectomy in humans. *Ann Surg* 2003;237(4):522-9.
- w75** Lai KC et al. Lansoprazole reduces ulcer relapse after eradication of *Helicobacter pylori* in nonsteroidal anti-inflammatory drug users—a randomized trial. *Aliment Pharm Therap* 2003;18(8):829-36.
- w76** Pakozdi A et al. Does long term therapy with lansoprazole slow progression of oesophageal involvement in systemic sclerosis? *Clin Exp Rheumatol* 2009;27(3)(Suppl.):8.
- w77** Xia HH et al. Symptomatic response to lansoprazole predicts abnormal acid reflux in endoscopy-negative patients with non-cardiac chest pain. *Aliment Pharm Therap* 2003;17(3):369-77.
- w78** Leung WK et al. Initial treatment with lansoprazole in young dyspeptic patients with negative urea breath test result: a randomized controlled trial with 12-month follow-up. *Am J Gastroenterol* 2007;102(7):1483-8.
- w79** Lai KC et al. Lansoprazole for the prevention of recurrences of ulcer complications from long-term low-dose aspirin use. *N Engl J Med* 2002;346(26):2033-8.
- w80** Collet JP et al. Prasugrel but not high dose clopidogrel overcomes the lansoprazole neutralizing effect of P2Y12 inhibition: Results of the randomized DOSAPI study. *Eur J Clin Pharmacol* 2014;70(9):1049-1057.
- w81** Talwar V et al. Clinical trial: chest pain caused by presumed gastro-oesophageal reflux in coronary artery disease - controlled study of lansoprazole vs. placebo. *Alimentary Pharmacology & Therapeutics* 2010;32(2):191-9.
- w82** Zhang J R et al. Efficacy of clopidogrel and clinical outcome when clopidogrel is coadministered with atorvastatin and lansoprazole: A prospective, randomized, controlled trial. *Medicine (United States)* 2015 ;94(50).
- w83** Feng Y et al. Efficacy of lansoprazole combined with conventional treatment in relieving gastrointestinal symptoms in patients with anxiety. *World Chinese J Digestology* 2014;22(26):4012-6. [Chinese]
- w84** Fletcher J et al. BMI is superior to symptoms in predicting response to proton pump inhibitor: randomised trial in patients with upper gastrointestinal symptoms and normal endoscopy. *Gut* 2011;60(4):442-8.
- w85** Jones GR et al. BMI is superior to symptom characteristics or esophageal pH metry in predicting response to PPI therapy in patients with normal endoscopy. *Gastroenterology* 2010;(1):S562.
- w86** Adamopoulos AB et al. Do proton pump inhibitors attenuate the effect of aspirin on platelet aggregation? A randomized crossover study. *J Cardiovasc Pharm* 2009;54(2):163-8.
- w87** Littner MR et al. Effects of 24 weeks of lansoprazole therapy on asthma symptoms, exacerbations, quality of life, and pulmonary function in adult asthmatic patients with acid reflux symptoms. *Chest* 2005;128(3):1128-35.
- w88** Havas T. Posterior pharyngolaryngitis. Double-blind randomised placebo-controlled trial of proton pump inhibitor therapy. *Aust J Otolaryngology* 1999;3(3):243-6.
- w89** El-Serag HB et al. Lansoprazole treatment of patients with chronic idiopathic laryngitis: A placebo-controlled trial. *Am J Gastroenterol* 2001;96(4):979-83.
- w90** Borjesson M et al. Nutcracker oesophagus: a double-blind, placebo-controlled, cross-over study of the effects of lansoprazole. *Aliment Pharm Therap* 2003;18(11-12):1129-35.
- w91** Fuchs W et al. Lansoprazole does not affect the bioavailability of oral contraceptives. *Brit J Clin Pharmacol* 1994;38(4):376-80.
- w92** Meikle AW et al. Effect of lansoprazole on male hormone function. *Drug Invest* 1994;8(4):191-202.
- w93** Vaezi MF et al. Proton pump inhibitor therapy improves symptoms in postnasal drainage. *Gastroenterology* 2010;139(6):1887-93.e1; e11.
- w94** Takahiko S et al. The proton pump inhibitor, lansoprazole, reduces frequency of exacerbations in patients with chronic obstructive pulmonary disease. *Chest Conference: Chest.* 2011;140.
- w95** Takebayashi K et al. Effect of combination therapy with alogliptin and lansoprazole on glycemic control in patients with type 2 diabetes. *Endocr J* 2014;61(10):1031-9.
- w96** Inukai T et al. Effect of combination therapy with alogliptin and lansoprazole on glycemic control in patients with type 2 diabetes. *Diabetes* 2015;64:A657.
- w97** Farup PG et al. Patients with functional dyspepsia responding to omeprazole have a characteristic gastro-oesophageal reflux pattern. *Scand J Gastroentero* 1999;34(6):575-9.
- w98** K D Bardhan Erosive Oesophagitis: outcome of repeated long term maintenance treatment with low dose omeprazole 10 mg or placebo. *Gut* 1998;43:458-64.
- w99** Talley NJ et al. Efficacy of omeprazole in functional dyspepsia: double-blind, randomized, placebo-controlled trials (the Bond and Opera studies). *Aliment Pharm Therap* 1998;12(11):1055-65.
- w100** Lauritsen K et al. Omeprazole 20 mg three days a week and 10 mg daily in prevention of duodenal ulcer relapse: Double-blind comparative trial. *Gastroenterology* 1991;100(3):663-9.
- w101** Carlsson R et al. Gastro-oesophageal reflux disease in primary care: an international study of different treatment strategies with omeprazole. *International GORD Study Group. Eur J Gastroen Hepat* 1998;10(2):119-24.
- w102** Bate CM et al. Omeprazole 10mg or 20mg once daily in the prevention of recurrence of reflux oesophagitis. *Solo Investigator Group. Gut* 1995;36(4):492-8.
- w103** Allgood LD et al. Comparison of Prilosec OTC (omeprazole magnesium 20.6 mg) to placebo for 14 days in the treatment of frequent heartburn. *J Clin Pharm Ther* 2005;30(2):105-12.
- w104** Blum AL et al. Short course acid suppressive treatment for patients with functional dyspepsia: results depend on *Helicobacter pylori* status. *The Frosch Study Group. Gut* 2000;47(4):473-80.
- w105** Richter JE et al. Efficacy of omeprazole for the treatment of symptomatic acid reflux disease without esophagitis. *Arch Intern Med* 2000;160(12):1810-6.
- w106** Venables TL et al. Maintenance treatment for gastro-oesophageal reflux disease: A placebo-controlled evaluation of 10 milligrams omeprazole once daily in general practice. *Scand J Gastroentero* 1997;32(7):627-32.
- w107** Laursen LS et al. Omeprazole in the long-term treatment of gastro-oesophageal reflux disease. A double-blind randomized dose-finding study. *Scand J Gastroentero* 1995;30(9):839-46.
- w108** Lind T et al. Heartburn without oesophagitis: efficacy of omeprazole therapy and features determining therapeutic response. *Scand J Gastroentero* 1997;32(10):974-9.
- w109** Uemura N et al. Efficacy and safety of omeprazole in Japanese patients with nonerosive reflux disease. *J Gastroenterol* 2008;43(9):670-8.
- w110** Cullen D et al. Primary gastroduodenal prophylaxis with omeprazole for non-steroidal anti-inflammatory drug users. *Aliment Pharm Therap* 1998;12:135-40.
- w111** Ekström P et al. Prevention of peptic ulcer and dyspeptic symptoms with omeprazole in patients receiving continuous non-steroidal anti-inflammatory drug therapy. A nordic multicentre study. *Scand J Gastroentero* 1996;31(8):753-8.
- w112** Bianchi Porro G et al. Prevention of gastroduodenal damage with omeprazole in patients receiving continuous NSAIDs treatment. A double blind placebo controlled study. *Ital J Gastroenterol* 1998;30(1):43-7.
- w113** Hawkey CJ et al. Omeprazole compared with misoprostol for ulcers associated with nonsteroidal anti-inflammatory drugs. Omeprazole versus Misoprostol for NSAID-induced Ulcer Management (OMNIUM) Study Group. *New Engl J Med* 1998;338(11):727-34.
- w114** Brun J et al. High dose proton pump inhibitor response as an initial strategy for a clinical diagnosis of gastro-oesophageal reflux disease (GERD). *Fam Pract* 2000;17(5):401-4.
- w115** Sgouros SN et al. Long-term acid suppressive therapy may prevent the relapse of lower esophageal (Schatzki's) rings: A prospective, randomized, placebo-controlled study. *Am J Gastroenterol* 2005;100(9):1929-34.

## References for trials listed in Webtables 1-7

- w116** Meineche-Schmidt V. Empiric treatment with high and standard dose of omeprazole in general practice: Two-week randomized placebo-controlled trial and 12-month follow-up of health-care consumption. *Am J Gastroenterol* 2004;99(6):1050-8.
- w117** Velthuis van ZS et al. Adding once-daily omeprazole 20 mg to metronidazole/amoxicillin treatment for *Helicobacter pylori* gastritis: A randomized, double-blind trial showing the importance of metronidazole resistance. *Am J Gastroenterol* 1998;93(1):5-10.
- w118** Bhatt DL et al. Clopidogrel with or without omeprazole in coronary artery disease. *N Engl J Med* 2010;363:1909-17.
- w119** Ishizaki T et al. Comparison of the interaction potential of a new proton pump inhibitor, E3810, versus omeprazole with diazepam in extensive and poor metabolizers of S-mephenytoin 4'-hydroxylation. *Clin Pharmacol Ther* 1995;58(2):155-64.
- w120** Marzio L et al. Short- and long-term omeprazole for the treatment and prevention of duodenal ulcer, and effect on *Helicobacter pylori*. *Am J Gastroenterol* 1995;90(12):2172-6.
- w121** Hetzel DJ et al. Healing and relapse of severe peptic esophagitis after treatment with omeprazole. *Gastroenterology* 1988;95(4):903-12.
- w122** Goh KL et al. Prevention of duodenal ulcer relapse with omeprazole 20 mg daily: a randomized double-blind, placebo-controlled study. *J Gastroen Hepatol* 1995;10(1):92-7.
- w123** Ford GA et al. Omeprazole in the treatment of asthmatics with nocturnal symptoms and gastro-oesophageal reflux: a placebo-controlled cross-over study. *Postgrad Med J* 1994;70(823):350-4.
- w124** Blohme I et al. A study of the interaction between omeprazole and cyclosporine in renal transplant patients. *Brit J Clin Pharmacol* 1993;35(2):156-60.
- w125** Guslandi M et al. Omeprazole-induced changes in gastric mucus secretion. *Method Find Exp Clin* 1992;14(3):219-23.
- w126** Garg PK et al. Role of omeprazole in prevention and treatment of postendoscopic variceal sclerotherapy esophageal complications. Double-blind randomized study. *Digest Dis Sci* 1995;40(7):1569-74.
- w127** Gerson LB et al. A prospective study of oesophageal 24-h ambulatory pH monitoring in patients with functional dyspepsia. *Digest Liver Dis* 2005;37(2):87-91.
- w128** Hatlebakk JG et al. Heartburn treatment in primary care: randomised, double blind study for 8 weeks. *Brit Med J* 1999;319(7209):550-3.
- w129** Suttin T et al. Stereoselective interaction of omeprazole with warfarin in healthy men. *Ther Drug Monit* 1989;11(2):176-84.
- w130** Unge P et al. A study of the interaction of omeprazole and warfarin in anticoagulated patients. *Brit J Clin Pharmacol* 1992;34(6):509-12.
- w131** Sartori S et al. Randomized trial of omeprazole or ranitidine versus placebo in the prevention of chemotherapy-induced gastroduodenal injury. *J Clin Oncol* 2000;18(3):463-7.
- w132** Sontag SJ et al. Two doses of omeprazole versus placebo in symptomatic erosive esophagitis: the U.S. Multicenter Study. *Gastroenterology* 1992;102(1):109-18.
- w133** Simon B et al. Protective effects of omeprazole against low-dose acetylsalicylic acid. An endoscopic controlled double blind study in healthy volunteers. *Arzneimittel-Forschung/Drug Research* 1995;45(6):701-3. [German].
- w134** Sontag SJ et al. Daily omeprazole surpasses intermittent dosing in preventing relapse of esophagitis: a US multi-centre double-blind study. *Aliment Pharm Therap* 1997;11(2):373-80.
- w135** Howard JM et al. Macroscopic healing of esophagitis does not improve esophageal motility. *Digest Dis Sci* 1994;39(3):648-54.
- w136** Rokkas T et al. Effectiveness of acid suppression in preventing gastroesophageal reflux disease (GERD) after successful treatment of *Helicobacter pylori* infection. *Digest Dis Sci* 2001;46(7):1567-72.
- w137** Bate CM et al. Reflux symptom relief with omeprazole in patients without unequivocal esophagitis. *Aliment Pharm Therap* 1996;10(4):547-55.
- w138** Heijerman HG et al. Improvement of fecal fat excretion after addition of omeprazole to pancrease in cystic fibrosis is related to residual exocrine function of the pancreas. *Digest Dis Sci* 1993;38(1):1-6.
- w139** Levin TR et al. Omeprazole improves peak expiratory flow rate and quality of life in asthmatics with gastroesophageal reflux. *Am J Gastroenterol* 1998;93(7):1060-3.
- w140** Meineche-Schmidt V et al. Anti-secretory therapy in 1017 patients with ulcerlike or refluxlike dyspepsia in general practice. *Eur J of General Practice* 1997;3:125-30.
- w141** Houben GMP et al. Twenty-four hour intragastric acidity: 300mg ranitidine b.d., 20mg omeprazole o.m., 40mg omeprazole o.m. vs. placebo. *Aliment Pharmacol Ther* 1995;9:649-54.
- w142** Ostovaneh MR et al. Comparing omeprazole with fluoxetine for treatment of patients with heartburn and normal endoscopy who failed once daily proton pump inhibitors: double-blind placebo-controlled trial. *Neurogastroenterology & Motility*. 2014;26(5):670-8.
- w143** Aimi M et al. Effects of omeprazole on sleep disturbance: Randomized multicenter double-blind placebo-controlled trial. *Clinical and Translational Gastroenterology* 2014;5 (6):(e57).
- w144** Stephenson KA and Fagan JJ. Effect of perioperative proton pump inhibitors on the incidence of pharyngocutaneous fistula after total laryngectomy: a prospective randomized controlled trial. *Head Neck*. 2015;37(2):255-9.
- w145** Ren Y H et al. 2011 Omeprazole affects clopidogrel efficacy but not ischemic events in patients with acute coronary syndrome undergoing elective percutaneous coronary intervention. *Chinese Medical Journal* 124(6):856-861.
- w146** Dammann HG et al. Intra-gastric acidity under 28-day omeprazole treatment. *Hepato-Gastroenterol* 1985;32(4):191-4.
- w147** Maev IV et al. Clinico-functional evaluation of the efficacy of treating gastroesophageal reflux disease combined with bronchial asthma with omeprazole. *Terapevt Arkh* 2002;74(8):55-7. [Russian]
- w148** Bolling-Sternevald E et al. Effect of profound acid suppression in functional dyspepsia: A double-blind, randomized, placebo-controlled trial. *Scand J Gastroenterol* 2002;37(12):1395-402.
- w149** Laine L et al. US double-blind, controlled trials of omeprazole and amoxicillin for treatment of *Helicobacter pylori*. *Aliment Pharm Therap* 1998;12(4):377-82.
- w150** Rabeneck L et al. A double blind, randomized, placebo-controlled trial of proton pump inhibitor therapy in patients with uninvestigated dyspepsia. *Am J Gastroenterol* 2002;97(12):3045-51.
- w151** Kiljander TO et al. Gastroesophageal reflux in asthmatics: A double-blind, placebo- controlled crossover study with omeprazole. *Chest* 1999;116(5):1257-64.
- w152** Scheiman JM et al. Omeprazole ameliorates aspirin-induced gastroduodenal injury. *Digest Dis Sci* 1994;39(1):97-103.
- w153** Achem SR et al. Effects of omeprazole versus placebo in treatment of noncardiac chest pain and gastroesophageal reflux. *Digest Dis Sci* 1997;42(10):2138-45.
- w154** Caraco Y et al. Interethnic difference in omeprazole's inhibition of diazepam metabolism. *Clin Pharmacol Ther* 1995;58(1):62-72.
- w155** Bortolotti M et al. Obstructive sleep apnoea is improved by a prolonged treatment of gastroesophageal reflux with omeprazole. *Digest Liver Dis* 2006;38(2):78-81.
- w156** Dorta G et al. The effects of omeprazole on healing and appearance of small gastric and duodenal lesions during dosing with diclofenac in healthy subjects. *Aliment Pharm Therap* 2000;14(5):535-41.
- w157** Kiljander TO et al. Chronic cough and gastro-oesophageal reflux: a double-blind placebo-controlled study with omeprazole. *Eur Respir J* 2000;16(4):633-8.
- w158** Fallahi GH et al. The effect of omeprazole on asthmatic adolescents with gastroesophageal reflux disease. [Erratum appears in *Allergy Asthma Proc*. 2008 Nov-Dec;29(6):675]. *Allergy Asthma Proc* 2008;29(5):517-20.
- w159** Meier JH et al. Does omeprazole (Prilosec) improve respiratory function in asthmatics with gastroesophageal reflux? A double-blind, placebo-controlled crossover study. *Digest Dis Sci* 1994;39(10):2127-33.
- w160** Sharma B et al. Acid secretory capacity and plasma gastrin concentration after administration of omeprazole to normal subjects. *Aliment Pharm Therap* 1987;1(1):67-76.
- w161** Teichtahl H et al. Adult asthma and gastro-oesophageal reflux: the effects of omeprazole therapy on asthma. *Aust NZ J Med* 1996;26(5):671-6.
- w162** Rabeneck L et al. SODA (severity of dyspepsia assessment): a new effective outcome measure for dyspepsia-related health. *J Clin Epidemiol* 2001;54(8):755-65.
- w163** Unge P et al. Does omeprazole improve antimicrobial therapy directed towards gastric *Campylobacter pylori* in patients with antral gastritis? A pilot study. *Scand J Gastroenterol* 1989;167(Suppl.):49-54.
- w164** Watson RG et al. Double blind cross-over placebo controlled study of omeprazole in the treatment of patients with reflux symptoms and physiological levels of acid reflux-the "sensitive oesophagus". *Gut* 1997;40(5):587-90.
- w165** Serfaty-Lacrosniere C et al. Hypochlorhydria from short-term Omeprazole treatment does not inhibit intestinal absorption of calcium, phosphorous, magnesium or zinc from food in humans. *J Am Coll Nutr* 1995;14(4):364-8.
- w166** Budzynski J et al. The effect of double dose of omeprazole on the course of angina pectoris and treadmill stress test in patients with coronary artery disease - A randomised, double-blind, placebo controlled, crossover trial. *Int J Cardiol* 2008;127(2):233-9.
- w167** Chen YQ et al. Efficacy of Jiangni Decoction in treatment of recurrent reflux esophagitis. *World Chinese J Digestol* 2013;21(21):2076-80. [Chinese]
- w168** Emami M et al. Efficacy of omeprazole on cough, Pulmonary function and quality of life of patients with sulfur mustard lung injury: A placebo-control, Cross-over clinical trial study. *Journal of Research in Medical Sciences* 2014;19(11):1027-33.
- w169** Poh CH et al. The effect of antireflux treatment on patients with gastroesophageal reflux disease undergoing a mental arithmetic stressor. *Neurogastroent Motil* 2011;23(11):e489-96.
- w170** Whellan DJ et al. PA32540 (a coordinated-delivery tablet of enteric-coated aspirin 325 mg and immediate-release omeprazole 40 mg) versus enteric-coated aspirin 325 mg alone in subjects at risk for aspirin-associated gastric ulcers: results of two 6-month, phase 3 studies. *Am Heart J* 2014;168(4):495-502.e4.
- w171** Goldstein JL et al. Prevalence of gastric ulcers in aspirin users and does the presence of erosions foreshadow ulcer development. *Gastroenterology* 2013;1(1):S565.
- w172** Cai J et al. 2010 Impact of different proton pump inhibitors on the antiplatelet activity of clopidogrel in combination with aspirin for patients undergoing coronary stent implantation. *Zhongguo Ying Yong Sheng Li Xue Za Zhi= Chinese J Applied Physiol* 26(3):266-9. [Chinese]
- w173** Boeree MJ et al. No effects of high-dose omeprazole in patients with severe airway hyperresponsiveness and (asymptomatic) gastro-oesophageal reflux. *Eur Respir J* 1998;11(5):1070-4.
- w174** Noordzij JP et al. Evaluation of omeprazole in the treatment of reflux laryngitis: a prospective, placebo-controlled, randomized, double-blind study. *Laryngoscope* 2001;111(12):2147-51.
- w175** Pandak WM et al. Short course of omeprazole: a better first diagnostic approach to noncardiac chest pain than endoscopy, manometry, or 24-hour esophageal pH monitoring. *J Clin Gastroenterol* 2002;35(4):307-14.

## References for trials listed in Webtables 1-7

- w176** Ours TM et al. A prospective evaluation of esophageal testing and a double-blind, randomized study of omeprazole in a diagnostic and therapeutic algorithm for chronic cough. *Am J Gastroenterol* 1999;94(11):3131-8.
- w177** Freedberg DE et al. Proton pump inhibitors alter specific taxa in the human fecal microbiome: Results of a crossover trial. *Gastroenterology* 2015;(1):S619.
- w178** Dabirmoghdam P et al. The efficacy of n-acetyl cysteine in reflux laryngitis. *Otolaryngology - Head and Neck Surgery (United States)*. 2012;147:77.
- w179** Richter JE et al. Oral pantoprazole for erosive esophagitis: A placebo-controlled, randomized clinical trial. *Am J Gastroenterol* 2000;95(11):3071-80.
- w180** Pilotto A et al. Short and long-term therapy for reflux oesophagitis in the elderly: A multi-centre, placebo-controlled study with pantoprazole. *Aliment Pharm Therap* 2003;17(11):1399-406.
- w181** Van Rensberg et al. Efficacy and safety of pantoprazole 20mg once daily treatment in patients with ulcer-like functional dyspepsia. *Curr Med Res Opin* 2008;24(7):2009-18.
- w182** Holtmann G et al. Improvement of non-steroidal anti-inflammatory drug-induced gastrointestinal symptoms during proton pump inhibitor treatment: are G-protein β3 subunit genotype, *Helicobacter pylori* status, and environmental factors response modifiers? *Digestion* 2011;84(4):289-98.
- w183** van der Velden AW et al. Pharmacological dependency in chronic treatment of gastroesophageal reflux disease: a randomized controlled clinical trial. *Digestion* 2010;81(1):43-52.
- w184** Bianchi Porro G et al. Efficacy of pantoprazole in the prevention of peptic ulcers, induced by non-steroidal anti-inflammatory drugs: A prospective, placebo-controlled, double-blind, parallel-group study. *Digest Liver Dis* 2000;32(3):201-8.
- w185** Dammann HG et al. Effects of pantoprazole on endocrine function in healthy male volunteers. *Aliment Pharm Therap* 1994;8(5):549-54.
- w186** Dos Santos LH et al. Evaluation of pantoprazol treatment response of patients with asthma and gastroesophageal reflux: a randomized prospective double-blind placebo-controlled study. *Jornal Brasileiro De Pneumologia E Tisiologia* 2006;33(2):119-27. [Brazilian].
- w187** Dabos KJ et al. The effect of mastic gum on *Helicobacter pylori*: a randomized pilot study. *Phytomedicine* 2010;17(3-4):296-9.
- w188** Wo JM et al. Double-blind, placebo-controlled trial with single-dose pantoprazole for laryngopharyngeal reflux. *Am J Gastroenterol* 2006;101(9):1972-8.
- w189** Schwartz MP et al. Effect of inhibition of gastric acid secretion on antropyloroduodenal motor activity and duodenal acid hypersensitivity in functional dyspepsia. *Aliment Pharm Therap* 2001;15(12):1921-8.
- w190** Muller P et al. The action of the proton pump inhibitor pantoprazol against acetylsalicylic acid-induced gastroduodenopathy in comparison to ranitidine. An endoscopic controlled, double blind comparison. *Arzneimittel-Forschung* 1998;48(5):482-5. [German]
- w191** Suurna MV et al. Randomized placebo-controlled trial of pantoprazole for daytime sleepiness in GERD and obstructive sleep disordered breathing. *Otolaryngol Head Neck Surg* 2008;139(2):286-90.
- w192** Cervelli MJ, Shaman A, Meade A, Carroll R, McDonald SP. Effect of gastric acid suppression with pantoprazole on the efficacy of calcium carbonate as a phosphate binder in haemodialysis patients. *Nephrology* 2012;17(5):458-65.
- w193** Niklasson A, Lindstrom L, Simren M, Lindberg G, Bjornsson E. Dyspeptic symptom development after discontinuation of a proton pump inhibitor: a double-blind placebo-controlled trial. *American Journal of Gastroenterology* 2010;105(7):1531-7.
- w194** Baysal B et al. Effect of pantoprazole and *Helicobacter pylori* therapy on uninvestigated dyspeptic patients. *Turkish Journal of Gastroenterology* 2015;26(1):6-14.
- w195** Gonzalez-Ortiz M et al. Effect of pantoprazole on insulin secretion in drug-naïve patients with type 2 diabetes. *Diabetes Res Clin Pract.* 2015;108(1):e11-3.
- w196** Lai B et al. Effect of gastric acid suppression with pantoprazole on the efficacy of sevelamer hydrochloride as a phosphate binder in haemodialysis patients: a pilot study. *Nephrology* 2012;17(4):402-6.
- w197** Yu L W et al. Wang 2013 Mechanism and preventive effect of teprenone on dual anti-platelet drugs in CVD patients. *Journal of Gastroenterology and Hepatology* 28:317-318.
- w198** Yang ZY. Efficacy and safety of pantoprazole sodium entericcoated tablets combined with mosapride in treatment of functional dyspepsia. *World Chinese Journal of Digestology* 2014;22(29):4514-8. [Chinese]
- w199** Zhao J H et al. Lu 2015 Pantoprazole for prevention and treatment of gastrointestinal bleeding in elderly patients after percutaneous coronary intervention. [Chinese]. *World Chinese Journal of Digestology* 23(13):2111-2115.
- w200** Eherer AJ et al. Effect of pantoprazole on the course of reflux-associated laryngitis: A placebo-controlled double-blind crossover study. *Scand J Gastroentero* 2003;38(5):462-7.
- w201** Singh PK et al. Pantoprazole improves glycemic control in type 2 diabetes: a randomized, double-blind, placebo-controlled trial. *J Clin Endocrinol Metab* 2012;97(11):E2105-8.
- w202** Kinoshita Y et al. Japan Rabeprazole Study Group for NERD. Randomised clinical trial: a multicentre, double-blind, placebo-controlled study on the efficacy and safety of rabeprazole 5 mg or 10 mg once daily in patients with non-erosive reflux disease. *Aliment Pharm & Therap* 2011;33(2):213-24.
- w203** Caos A et al. Long-term prevention of erosive or ulcerative gastro-oesophageal reflux disease relapse with rabeprazole 10 or 20mg vs. Placebo: results of a 5-year study in the United States. *Aliment Pharm Therap* 2005;22(3):193-202.
- w204** Caos A et al. Rabeprazole for the prevention of pathologic and symptomatic relapse of erosive or ulcerative gastroesophageal reflux disease. *Rabeprazole Study Group. Am J Gastroenterol* 2000;95(11):3081-8.
- w205** Cloud ML et al. Rabeprazole in treatment of acid peptic diseases: results of three placebo-controlled dose-response clinical trials in duodenal ulcer, gastric ulcer, and gastroesophageal reflux disease (GERD). *The Rabeprazole Study Group. Digest Dis Sci* 1998;43(5):993-1000.
- w206** Birbara C et al. Rabeprazole for the prevention of recurrent erosive or ulcerative gastro-oesophageal reflux disease. *Rabeprazole Study Group. Eur J Gastroen Hepat* 2000;12(8):889-97.
- w207** Miner P, Jr. et al. Rabeprazole in nonerosive gastroesophageal reflux disease: a randomized placebo-controlled trial. *Am J Gastroenterol* 2006;97(6):1332-9.
- w208** Tominaga K, et al. Differences of influencing factors of PPI and placebo responder in functional dyspepsia: Clinical advantage of effect on suppression of acid with rabeprazole in functional dyspepsia (the CAESAR study). *Gastroenterology* 2011;1):S884.
- w209** Tanaka M et al. The therapeutic effectiveness of the coadministration of weekly risedronate and proton pump inhibitor in osteoporosis treatment. *J Osteoporosis* 2014;2014:607145.
- w210** Munesue M et al. Rabeprazole improves symptoms of patients with functional dyspepsia: Multicenter, double-blind, randomized, placebo-controlled clinical trial; samurai study. *Gastroenterology* 2012;1):S171.
- w211** Hidaka H et al. Long-term administration of PPI reduces treatment failures after esophageal variceal band ligation. *Gastroenterological Endoscopy* 2012;54:834.
- w212** Itoh S et al. The effects of risedronate administered in combination with a proton pump inhibitor for the treatment of osteoporosis. *J Bone Miner Metab* 2013;31(2):206-11.
- w213** Iwakiri R et al. Randomised clinical trial: rabeprazole improves symptoms in patients with functional dyspepsia in Japan. *Aliment Pharm Therap* 2013;38(7):729-40.
- w214** Chen H et al. Rabeprazole combined with hydroalcalite is effective for patients with bile reflux gastritis after cholecystectomy. *Can J Gastroenterol* 2010;24(3):197-201.
- w215** Dammann HG et al. The effects of oral rabeprazole on endocrine and gastric secretory function in healthy volunteers. *Aliment Pharm Therap* 1999;13(9):1195-203.
- w216** Laheij RJ et al. Proton-pump inhibitor therapy for acetylsalicylic acid associated upper gastrointestinal symptoms: a randomized placebo-controlled trial. *Aliment Pharm Therap* 2003;18(1):109-15.
- w217** van Rossum LG et al. Health-related quality of life in patients with cardiovascular disease-the effect of upper gastrointestinal symptom treatment. *Aliment Pharm Therap* 2004;19(10):1099-104.
- w218** Santarelli L et al. Post-cholecystectomy alkaline reactive gastritis: a randomized trial comparing sucralfate versus rabeprazole or no treatment. *Eur J Gastroen Hepat* 2003;15(9):975-9.
- w219** Johanson J et al. Rabeprazole significantly improves heartburn vs placebo in endoscopically negative GERD patients with moderate to severe symptoms. *Am J Gastroenterol* 2001;96(9)(Suppl.):18.
- w220** Chan FKL et al. Rabeprazole for the prevention of gastroduodenal injury associated with nonsteroidal anti-inflammatory drugs (NSAIDs): A double-blind randomized trial. *Gastroenterology* 2014;(1):S-208.
- w221** Katare SS et al. A prospective, comparative, randomized, controlled, open label, 3-arm study for evaluation of efficacy, safety and quality of life with tropidine and rabeprazole given alone and in combination in patients of gastritis. *Indian J Pharmacol* 2013;45:S12.
- w222** Sun Q and Yao HX. Clinical observation of rabeprazole combined with flupentixol and melitracen treatment to non-erosive gastroesophageal reflux disease. *Journal of Shanghai Jiaotong University (Medical Science)*. 2014;34(3):352-6+60. [Chinese]
- w223** Peterson KA et al. The role of gastroesophageal reflux in exercise-triggered asthma: a randomized controlled trial. *Digest Dis Sci* 2008;54(3):564-71.
- w224** Pawar S et al. Treatment of postnasal drip with proton pump inhibitors: A prospective, randomized, placebo-controlled study. *Am J Rhinol* 2007;21(6):695-701.
- w225** Steward DL et al. Proton pump inhibitor therapy for chronic laryngo-pharyngitis: a randomized placebo-control trial. *Otolaryng Head Neck* 2004;131(4):342-50.
- w226** Lam PKY et al. Rabeprazole is effective in treating laryngopharyngeal reflux in a randomized placebo-controlled trial. *Clinical Gastroenterology and Hepatology* 2010;8(9):770-6.
- w227** Leelayuthachai T et al. A randomized, placebo-controlled trial of proton-pump inhibitor (PPI) on sleep parameters in patients with coexisting abnormal esophageal acid exposure and obstructive sleep apnea (OSA). *Chest Conference: CHEST* 2012;142.
- w228** Johannson J et al. Impact of proton pump inhibitors on benign anastomotic stricture formations after esophagectomy and gastric tube reconstruction: results from a randomized clinical trial. *Ann Surg* 2009;250:667-73.
- w229** Holtmann G et al. A placebo controlled randomised treatment trial for functional dyspepsia including post-treatment drug withdraw and placebo withdraw effects. *Gastroenterology* 2013;S733.
- w230** Tulassay Z et al. Effect of esomeprazole triple therapy on eradication rates of *Helicobacter pylori*, gastric ulcer healing and prevention of relapse in gastric ulcer patients. *Eur J Gastroen Hepat* 2008;20(6):526-36.
- w231** Avner DL et al. A comparison of three doses of lansoprazole (15, 30 and 60 mg) and placebo in the treatment of duodenal ulcer. *The Lansoprazole Study Group. Aliment Pharm Therap* 1995;9(5):521-8.

## References for trials listed in Webtables 1-7

- w232** Avner DL et al. Comparison of once daily doses of lansoprazole (15, 30, and 60 mg) and placebo in patients with gastric ulcer. *Am J Gastroenterol* 1995;90(8):1289-94.
- w233** Jhala NC et al. The effects of short-term lansoprazole therapy on Helicobacter pylori infection and antral gastritis in duodenal ulcer patients. *Am J Gastroenterol* 1995;90(10):1824-8.
- w234** Lanza F et al. Double-blind comparison of lansoprazole, ranitidine, and placebo in the treatment of acute duodenal ulcer. *Am J Gastroenterol* 1994;89(8):1191-200.
- w235** Fu L and M. Luo 2012 Therapeutic effect of continuing anti-secretory treatment after. *Chinese J Gastroenterology* 17(5):297-299. [Chinese]
- w236** Harford W et al. Double-blind, multicenter evaluation of lansoprazole and amoxicillin dual therapy for the cure of Helicobacter pylori infection. *Helicobacter* 1996;1(4):243-50.
- w237** Hsu CC et al. One-week low-dose triple therapy without anti-acid treatment has sufficient efficacy on Helicobacter pylori eradication and ulcer healing. *Hepato-Gastroenterol* 2003;50(53):1731-4.
- w238** D'Imperio N et al. Randomized study on the effectiveness of omeprazole in the treatment of operative endoscopy-induced oesophagogastric lesions. *Argo Gastroenterol Clin* 1994;7(2):71-6. [Italian]
- w239** Jung JM et al. Role of anti-secretory treatment in addition to Helicobacter pylori eradication triple therapy in the treatment of peptic ulcer. *Korean J Gastroenterol/Taehan Sohwagi Hakhoe Chi* 2008;51(1):11-8. [Korean]
- w240** Dotto P et al. Comparison of three different therapeutic regimens for eradicating Helicobacter pylori. *Curr Ther Res Clin E* 1993;53(5):557-64.
- w241** Valenzuela JE et al. Comparison of once-daily doses of omeprazole (40 and 20 mg) and placebo in the treatment of benign gastric ulcer: A multicenter, randomized, double-blind study. *Am J Gastroenterol* 1996;91(12):2516-22.
- w242** Sezer R et al. Effect of omeprazole plus ciprofloxacin on healing of duodenal ulcer and clearance of Helicobacter pylori. *Med Bul Istanbul Med Fac* 1995;28(2):10-14.
- w243** Graham DY et al. Omeprazole versus placebo in duodenal ulcer healing. The United States experience. *Digest Dis Sci* 1990;35(1):66-72.
- w244** Colin R et al. Duodenal ulcer healing with 1-week eradication triple therapy followed, or not, by anti-secretory treatment: a multicentre double-blind placebo-controlled trial. *Aliment Pharm Therap* 2002;16(6):1157-62.
- w245** Marzio L et al. Triple therapy for 7 days vs. triple therapy for 7 days plus omeprazole for 21 days in treatment of active duodenal ulcer with Helicobacter pylori infection. A double blind placebo controlled trial. *Digest Liver Dis* 2003;35(1):20-3.
- w246** Tepes B et al. Is a one-week course of triple anti-Helicobacter pylori therapy sufficient to control active duodenal ulcer? *Aliment Pharm Therap* 2001;15(7):1037-45.
- w247** Labenz J et al. One-week low-dose triple therapy for Helicobacter pylori is sufficient for relief from symptoms and healing of duodenal ulcers. *Aliment Pharmacol Ther* 1997;11(1):89-93.
- w248** Uyguner et al. Duodenal ulcer healing with one week therapy. *Turkish Journal of Gastroenterology* 1998;9(1):46-9. [Turkish]
- w249** Zafar M et al. Gastroprotective evaluation of phyllanthus emblica in the patients with gastric ulcers. *Value in Health* 2012;15(7):A635.
- w250** Neil GA et al. Helicobacter pylori eradication as a surrogate marker for the reduction of duodenal ulcer recurrence. *Aliment Pharm Therap* 1998;12(7):619-33.
- w251** Bago J et al. Effect of acid suppression therapy and eradication of Helicobacter pylori infection on duodenal ulcer healing and recurrence. *Croat J Gastro Hep* 1998;7(3-4):77-81.
- w252** Takeuchi, T et al. Strategies for peptic ulcer healing after 1 week proton pump inhibitor-based triple Helicobacter pylori eradication therapy in Japanese patients: Differences of gastric ulcers and duodenal ulcers. *J Clin Biochem Nutr* 2012;51(3):189-195.
- w253** Cloud ML et al. Rabeprazole in treatment of acid peptic diseases: results of three placebo-controlled dose-response clinical trials in duodenal ulcer, gastric ulcer, and gastroesophageal reflux disease (GERD). The Rabeprazole Study Group. *Digest Dis Sci* 1998;43(5):993-1000.
- w254** Sung JYJ et al. Intravenous esomeprazole for prevention of recurrent peptic ulcer bleeding: a randomized trial. *Ann Intern Med* 2009;150(7):455-64.
- w255** Hawkey GM et al. Drug treatments in upper gastrointestinal bleeding: value of endoscopic findings as surrogate end points. *Gut* 2001;49(3):372-9.
- w256** Khuroo MS et al. A comparison of omeprazole and placebo for bleeding peptic ulcer. *New Engl J Med* 1997;336(15):1054-8.
- w257** Javid G et al. Omeprazole as adjuvant therapy to endoscopic combination injection sclerotherapy for treating bleeding peptic ulcer. *Am J Med* 2001;111(4):280-4.
- w258** Sofia C et al. Endoscopic injection therapy vs. multipolar electrocoagulation vs. laser vs. injection + octreotide vs. injection + omeprazole in the treatment of bleeding peptic ulcers. A prospective randomized study. *Hepato-Gastroenterol* 2000;47(35):1332-6.
- w259** Lau JYW et al. Effect of intravenous omeprazole on recurrent bleeding after endoscopic treatment of bleeding peptic ulcers. *New Engl J Med* 2000;343(5):310-6.
- w260** Hasselgren G et al. Continuous intravenous infusion of omeprazole in elderly patients with peptic ulcer bleeding. Results of a placebo-controlled multicenter study. *Scand J Gastroentero* 1997;32(4):328-33.
- w261** Lau JY et al. Omeprazole before endoscopy in patients with gastrointestinal bleeding. *New Engl J Med* 2007;356(16):1631-40.
- w262** Schaffalitzky de Muckadell OBS et al. Effect of omeprazole on the outcome of endoscopically treated bleeding peptic ulcers. Randomized double-blind placebo-controlled multicentre study. *Scand J Gastroentero* 1997;32(4):320-7.
- w263** Daneshmend TK et al. Omeprazole versus placebo for acute upper gastrointestinal bleeding: randomised double blind controlled trial. *Brit Med J* 1992;304(6820):143-7.
- w264** Zargar SA et al. Pantoprazole infusion as adjuvant therapy to endoscopic treatment in patients with peptic ulcer bleeding: prospective randomized controlled trial. *J Gastroen Hepatol* 2006;21(4):716-21.
- w265** Hung WK et al. Randomized trial comparing pantoprazole infusion, bolus and no treatment on gastric pH and recurrent bleeding in peptic ulcers. *Aust NZ J Surg* 2007;77(8):677-81.
- w266** Reece SB et al. Gastrointestinal absorption of D-xylose, glucose, and vitamin B12 during chronic therapy with arbabostil. *Curr Ther Res Clin El* 1982;32(2):336-46.
- w267** Lanza FL et al. Effect of enprostil on the gastroduodenal mucosa of healthy volunteers. *Aliment Pharmacol Ther* 1990;4(6):601-13.
- w268** Davis TM et al. Effect of enprostil on glucose and lipid metabolism in type 2 diabetes. *Diabetic Med* 1989;6(5):400-5.
- w269** Santillan RM et al. Prevention of gastroduodenal injury induced by NSAIDs with low-dose misoprostol. *P W Pharmacol Soc* 1999;42:33-4.
- w270** Donnelly MT et al. Low-dose misoprostol for the prevention of low-dose aspirin-induced gastroduodenal injury. *Aliment Pharm Therap* 2000;14(5):529-34.
- w271** Delmas PD et al. Misoprostol in the prevention of gastric erosions caused by nonsteroidal anti-inflammatory agents. *Rev Rhum* 1994;61(2):115-20.
- w272** Graham DY et al. Prevention of NSAID-induced gastric ulcer with misoprostol: multicentre, double-blind, placebo-controlled trial. *Lancet* 1988;2(8623):1277-80.
- w273** Spaggiari L et al. Evaluation of the clinical efficacy of gastric cytoprotection with misoprostol in patients treated with NSAIDs after proctologic surgery. *Clin Terap* 1993;142(3):235-41. [Italian]
- w274** Bocanegra TS et al. Diclofenac/misoprostol compared with diclofenac in the treatment of osteoarthritis of the knee or hip: A randomized, placebo controlled trial. *J Rheumatol* 1998;25(8):1602-11.
- w275** Van Beusekom HJ et al. ECSTRA study. A double-blind, placebo-controlled study on the effects of adding misoprostol to a 'standard treatment' of rheumatoid arthritis. *TGO-Tijdschr Ther Ge* 1995;20(3):7-11. [Dutch]
- w276** Munger M et al. Misoprostol effects on diclofenac-induced cardiorenal changes in salt-sensitive patients with hypertension: The MEDIC study. *Pharmacotherapy* 2008;28(7):834-42.
- w277** Ahmed WU et al. Misoprostol in the treatment of NSAID-induced gastroduodenal lesions. *Indian J Gastroenterol* 1991;10(4):135-6.
- w278** Goldin E et al. Efficacy of misoprostol and ranitidine in the prevention of duodenal ulcer relapse and its correlation with endogenous gastric prostanoid synthesis. *Aliment Pharm Therap* 1991;5(2):173-80.
- w279** Bach GL et al. Therapy of non-steroidal anti-rheumatic drug-induced gastrointestinal lesions with misoprostol. *Zeitschrift fur Rheumatologie* 1991;50(3):175-80. [German]
- w280** Curtis LD et al. Misoprostol in renal transplantation. *Transplant P* 1993;25(1:Pt 1):602.
- w281** Raskin JB et al. Misoprostol dosage in the prevention of nonsteroidal anti-inflammatory drug-induced gastric and duodenal ulcers: a comparison of three regimens. *Ann Intern Med* 1995;123(5):344-50.
- w282** Pazzi P et al. Misoprostol for the treatment of chronic erosive gastritis: A double-blind placebo-controlled trial. *Am J Gastroenterol* 1994;89(7):1007-13.
- w283** De Melo Gomes JA et al. The safety of Arthrotec in patients with rheumatoid arthritis or osteoarthritis: an assessment of the upper gastrointestinal tract by endoscopy. *Scand J Rheumatol* 1992;96(Suppl.):23-31.
- w284** Doherty M et al. The efficacy of Arthrotec in the treatment of osteoarthritis. *Scand J Rheumatol* 1992;21(96)(Suppl.):15-21.
- w285** Agrawal NM et al. Misoprostol co-administered with diclofenac for prevention of gastroduodenal ulcers. A one-year study. *Digest Dis Sci* 1995;40(5):1125-31.
- w286** Hannequin JR et al. Efficacy of Arthrotec in the treatment of rheumatoid arthritis. *Scand J Rheumatol* 1992;96(Suppl.):7-14.
- w287** Akkuzu B et al. Efficacy of misoprostol in the treatment of tinnitus in patients with diabetes and/or hypertension. *Auris Nasus Larynx* 2004;31(3):226-32.
- w288** Zuinen C et al. Diclofenac/misoprostol vs diclofenac/placebo in treating acute episodes of tendinitis/bursitis of the shoulder. *Drugs* 1993;45(Suppl. 1):17-23.
- w289** Chandrasekaran AN et al. Double blind, placebo controlled trial on the cytoprotective effect of misoprostol in subjects with rheumatoid arthritis, osteoarthritis and seronegative spondyloarthritis on NSAIDs. *J Assoc Phys of Ind* 1991;39:919-21.
- w290** Henriksson K et al. Helicobacter pylori infection, ABO blood group, and effect of misoprostol on gastroduodenal mucosa in NSAID-treated patients with rheumatoid arthritis. *Digest Dis Sci* 1993;38(9):1688-96.
- w291** Spaziani E et al. Chronic gastritis and prostaglandins. Results of endoscopic screening. *Minerva Gastroenterol Diet* 1994;40(4):167-75. [Italian]
- w292** Bardhan KD et al. The prevention and healing of acute non-steroidal anti-inflammatory drug-associated gastroduodenal mucosal damage by misoprostol. *Brit J Rheumatol* 1993;32(11):990-5.
- w293** Boers M et al. No effect of misoprostol on renal function of rheumatoid patients treated with diclofenac. *Brit J Rheumatol* 1991;30(1):56-9.
- w294** Briner W et al. Synthetic prostaglandin E1 misoprostol as a treatment for tinnitus. *Arch Otolaryngol* 1993;119(6):652-4.

## References for trials listed in Webtables 1-7

- w295** Fujimori S et al. Prevention of nonsteroidal anti-inflammatory drug-induced small-intestinal injury by prostaglandin: a pilot randomized controlled trial evaluated by capsule endoscopy. *Gastrointest Endosc* 2009;69(7):1339-46.
- w296** Kelly SM et al. Increased gastric juice epidermal growth factor after non-steroidal anti-inflammatory drug ingestion. *Gut* 1994;35(5):611-4.
- w297** Evers S et al. Prostaglandin analog mechanisms are not effective in refractory chronic cluster headache. *Headache* 1998;38(8):618-20.
- w298** Levi S et al. Effects of nonsteroidal anti-inflammatory drugs and misoprostol on gastroduodenal epithelial proliferation in arthritis. *Gastroenterology* 1992;102(5):1605-11.
- w299** Elliott SL et al. Efficacy of 12 months misoprostol as prophylaxis against NSAID-induced gastric ulcers. *Scand J Rheumatol* 1994;23(4):171-6.
- w300** Duenas-Gonzalez A et al. Misoprostol prophylaxis for high-dose chemotherapy-induced mucositis: a randomized double-blind study. *Bone Marrow Transpl* 1995;17(5):809-12.
- w301** Roth SH et al. A controlled study comparing the effects of nabumetone, ibuprofen, and ibuprofen plus misoprostol on the upper gastrointestinal tract mucosa. *Arch Intern Med* 1993;153(22):2565-71.
- w302** Graham DY et al. Duodenal and gastric ulcer prevention with misoprostol in arthritis patients taking NSAIDs. *Ann Intern Med* 1993;119(4):257-62.
- w303** Silverstein FE et al. Misoprostol reduces serious gastrointestinal complications in patients with rheumatoid arthritis receiving nonsteroidal anti-inflammatory drugs. A randomized, double-blind, placebo-controlled trial. *Ann Intern Med* 1995;123(4):241-9.
- w304** Shiokawa Y et al. Evaluation of misoprostol's clinical utility for gastric/duodenal ulcers seen under long-term use of non-steroidal anti-inflammatory drugs (NSAID)-I. Evaluation of mucosal prophylactic effects by a placebo-controlled double blind comparative study. *Ryumachi* 1991;31(5):554-71. [Japanese]
- w305** Saggiaro A et al. Misoprostol prevents NSAID-induced gastroduodenal lesions in patients with osteoarthritis and rheumatoid arthritis. *Ital J Gastroenterol* 1991;23:119-23.
- w306** Fullerton T et al. Evaluation of the renal protective effect of misoprostol in elderly, osteoarthritic patients at risk for nonsteroidal anti-inflammatory drug-induced renal dysfunction. *J Clin Pharmacol* 1993;33(12):1225-32.
- w307** Bolten W et al. Treatment of NSAID-induced gastrointestinal complaints by comedication with the prostaglandin analogue misoprostol in rheumatoid arthritis patients. A multicentred double-blind placebo controlled study. *Aktuel Rheumatol* 1989;14(5):214-20. [German]
- w308** Bennett PN et al. Misoprostol does not alter the pharmacokinetics of propranolol. *Postgrad Med J* 1991;67(787):455-7.
- w309** Hilbrands LB et al. Randomized trial of misoprostol in patients with chronic renal transplant rejection. *Transplant Int* 1996;9(Suppl.1):41-4.
- w310** Goodwin JS et al. Effect of misoprostol on immune function in elderly subjects. *Prostaglandins* 1987;33(Suppl.):7.
- w311** Moran M et al. Prevention of acute graft rejection by the prostaglandin E1 analogue misoprostol in renal-transplant recipients treated with cyclosporine and prednisone. *New Engl J Med* 1990;322(17):1183-8.
- w312** Weinblatt ME et al. Lack of a renal-protective effect of misoprostol in rheumatoid arthritis patients receiving cyclosporin A. Results of a randomized, placebo-controlled trial. *Arthrit Rheum* 1994;37(9):1321-5.
- w313** Mavligit GM et al. Gastroduodenal mucosal injury during hepatic arterial infusion of chemotherapeutic agents. Lack of cytoprotection by prostaglandin E1 analogue. *Gastroenterology* 1987;92(3):566-9.
- w314** Kim HJ et al. Effects of misoprostol on renal function and plasma endothelin-1 levels during early postoperative stage of living donor renal transplant recipients. *Transplant P* 1996;28(3):1207-9.
- w315** Hausken T et al. Misoprostol treatment exacerbates abdominal discomfort in patients with non-ulcer dyspepsia and erosive prepyloric changes. A double-blind, placebo-controlled, multicentre study. *Scand J Gastroenterol* 1990;25(10):1028-33.
- w316** Yilmaz I et al. Misoprostol in the treatment of tinnitus: a double-blind study. *Otolaryngology - Head & Neck Surgery* 2004;130(5):604-10.
- w317** Wasiak W et al. A six week double blind, placebo controlled, crossover study of the effect of misoprostol in the treatment of aspirin sensitive asthma. *Thorax* 1999;54(10):900-4.
- w318** Nishida U et al. Evaluation of small bowel blood flow in healthy subjects receiving low-dose aspirin. *World J Gastroenterology* 2011;17(2):226-30.
- w319** Han X et al. Effect of Rebamipide on the Premalignant Progression of Chronic Gastritis: A Randomized Controlled Study. *Clin Drug Invest.* 2015;35(10):665-73.
- w320** Mizukami K et al. Efficacy of rebamipide for low-dose aspirin-related gastrointestinal symptoms. *Journal of Clin Biochem and Nutri* 2012;51(3):216-20.
- w321** Tozawa K et al. A randomized, double-blind, placebo-controlled study of rebamipide for gastric mucosal injury taking aspirin with or without clopidogrel. *Digest Dis Sci* 2014;59(8):1885-90.
- w322** Fujimori S et al. Rebamipide has the potential to reduce the intensity of NSAID-induced small intestinal injury: a double-blind, randomized, controlled trial evaluated by capsule endoscopy. *J Gastroenterology* 2011;46(1):57-64.
- w323** Kato M et al. Rebamipide prevents low-dose aspirin-induced small intestinal injuries: A randomized placebo-controlled double-blinded cross-over study using video capsule endoscopy and contrast-enhanced ultrasonography. *Gastroenterology* 2011;(1):S60 (271).
- w324** Kamada T et al. Rebamipide improves chronic inflammation in the lesser curvature of the corpus after *Helicobacter pylori* eradication: A multicenter study. *Biomed Res Int* 2015: 865146.
- w325** Kurokawa S et al. 2014 A randomized, double-blinded, placebo-controlled, multicenter trial, healing effect of rebamipide in patients with low-dose aspirin and/or non-steroidal anti-inflammatory drug induced small bowel injury. *J Gastroenterology* 49(2):239-44.
- w326** Horiki N et al. Prevention of celecoxib-induced gastrointestinal mucosal injury by concomitant therapy with gastro-protective drug rebamipide. *Digest Dis Sci* 2012;57(11):2732.
- w327** Adachi K et al. A study on the efficacy of rebamipide for patients with proton pump inhibitor-refractory non-erosive reflux disease. *Digest Dis Sci* 2012;57(6):1609-17.
- w328** Abou-Raya A et al. Efficacy of rebamipide in prevention of COX-2 inhibition induced gastrointestinal injuries (gastropathy) in older adults with knee osteoarthritis: A randomized placebo-controlled study. *Ann Rheum Dis Conf: Ann Europe Cong Rheumatology Europe League Against Rheumatism, EULAR.* 2012;71.
- w329** Watanabe T et al. A multicenter, randomized, double-blind, placebo-controlled trial of high-dose rebamipide treatment for low-dose aspirin-induced moderate-to-severe small intestinal damage. *PLoS ONE* 2015;10(4):e0122330.
- w330** Paladini G et al. Prophylactic and therapeutic role of rioprostil in NSAIDs induced gastroduodenal lesions. *Scand J Gastroentero* 1989;24(164)(Suppl.):242-6.
- w331** Purushotham AD et al. Prostaglandins in the treatment of reflux oesophagitis: double-blind placebo controlled clinical trial. *J Roy Coll Surg Edin* 1991;36(4):216-8.
- w332** Karim SM et al. Effects of some naturally occurring prostaglandins and synthetic analogues on gastric secretion and ulcer healing in man. *Adv Prostag Thromb Res* 1976;2:529-39.
- w333** Gibinski K et al. Double-blind clinical trial on gastroduodenal ulcer healing with prostaglandin E2 analogues. *Gut* 1977;18(8):636-9.
- w334** Jaszewski R et al. Failure of a cytoprotective dose of Arbacet to heal acute gastric ulcers. *Am J Gastroenterol* 1988;83(7):734-6.
- w335** Euler AR et al. A multiclinic trial evaluating arbacetol [15(R)-15-methyl prostaglandin E2] as a therapeutic agent for gastric ulcer. *Gastroenterology* 1989;96(4):967-71.
- w336** Euler AR et al. Failure of a cytoprotective dose of arbacetol to heal acute duodenal ulcers. Results of a multiclinic trial. *Gastroenterology* 1987;92(3):604-7.
- w337** Euler AR et al. A report of three multiclinic trials evaluating arbacetol in arthritic patients with ASA/NSAID gastric mucosal damage. *Gastroenterology* 1990;98(6):1549-57.
- w338** Jaszewski R et al. The effect of 15(R)-15-methyl prostaglandin E2 (Arbacet) on the healing of aspirin or nonsteroidal anti-inflammatory drug-induced gastric mucosal lesions: an endoscopic study. *Am J Gastroenterol* 1987;82(12):1271-4.
- w339** Euler AR et al. Arbacetol [15(R)-15-methyl prostaglandin E2] in a single night-time dose of either 50 or 100 micrograms in acute duodenal ulcer. *Gastroenterology* 1989;97(1):98-103.
- w340** Euler AR et al. An evaluation of arbacetol at multiple doses for the treatment of acute duodenal ulcer: a randomized double-blind placebo-controlled international trial. *Am J Gastroenterol* 1990;85(2):145-9.
- w341** Chen FW et al. Effect of prostaglandin E2 and 15(R)15 methyl PGE2 on duodenal ulcer. *Singap Med J* 1980;21(3):596-8.
- w342** Vantrappen G et al. Effect of 15(R)-15-methyl prostaglandin E2 (arbacetol) on the healing of duodenal ulcer. A double-blind multicenter study. *Gastroenterology* 1982;83(2):357-63.
- w343** Dal Monte PR et al. Evaluation of the efficacy and tolerability of enprostil, a synthetic prostaglandin E2 analog, in a clinical double-blind, placebo controlled trial. *Clin Therapeut* 1988;125(5):337-43. [Italian]
- w344** Schubert TT et al. A US multicenter study of enprostil 35 micrograms twice daily for treatment of prepyloric, pyloric channel, and duodenal bulb ulcers. *Enprostil Study Group. Digest Dis Sci* 1989;34(9):1355-60.
- w345** Bright-Asare P et al. Treatment of duodenal ulcer with enprostil, a prostaglandin E2 analogue. *Am J Med* 1986;81(2A):64-8.
- w346** Navert H et al. Treatment of gastric ulcer with enprostil. *Am J Med* 1986;81(2A):75-9.
- w347** Thomson AB et al. Treatment of duodenal ulcer with enprostil, a synthetic prostaglandin E2 analogue. *Am J Med* 1986;81(2A):59-63.
- w348** Sontag SJ et al. Healing of NSAID-induced gastric ulcers with a synthetic prostaglandin analog (enprostil). *Am J Gastroenterol* 1994;89(7):1014-20.
- w349** Agrawal NM et al. Healing of benign gastric ulcer: A placebo-controlled comparison of two dosage regimens of misoprostol, a synthetic analog of prostaglandin E2 analogues. *Digest Dis Sci* 1985;30(Suppl.11):164-70.
- w350** Lam S-K et al. Prostaglandin E2 (misoprostol) overcomes the adverse effect of chronic cigarette smoking on duodenal ulcer healing. *Digest Dis Sci* 1986;31(Suppl.2):68-74.
- w351** Brand DL et al. Misoprostol, a synthetic PGE1 analog, in the treatment of duodenal ulcers: A multicenter double-blind study. *Digest Dis Sci* 1985;30(Suppl.11):147-58.
- w352** Bright-Asare P et al. Efficacy of misoprostol (twice daily dosage) in acute healing of duodenal ulcer. A multicenter double-blind controlled trial. *Digest Dis Sci* 1986;31(Suppl.2):63-7.
- w353** Sontag SJ et al. Misoprostol in the treatment of duodenal ulcer: A multicenter double-blind placebo-controlled study. *Digest Dis Sci* 1985;30(Suppl.):159-63.
- w354** Mazure PA et al. Misoprostol in the treatment of active duodenal ulcer: A double-blind trial. *Acta Gastroenterologica Latinoamericana* 1985;15(1):13-24. [Spanish]
- w355** Ahmed WU et al. A double-blind study of misoprostol (SC-29333) in the healing of duodenal ulcer. *J Gastroen Hepatol* 1991;6(2):179-80.
- w356** Jaszewski R et al. Treatment of nonsteroidal anti-inflammatory drug-induced gastric ulcers with misoprostol. A double-blind multicenter study. *Digest Dis Sci* 1992;37(12):1820-4.

## References for trials listed in Webtables 1-7

- w357** Newman RD et al. Misoprostol in the treatment of duodenal ulcer refractory to H2-blocker therapy. A placebo-controlled, multicenter, double-blind, randomized trial. *Am J Med* 1987;83(1A):27-31.
- w358** Roth S et al. Misoprostol heals gastroduodenal injury in patients with rheumatoid arthritis receiving aspirin. *Arch Intern Med* 1989;149(4):775-9.
- w359** Barakat MH et al. Cigarette smoking and duodenal ulcer healing. An endoscopic study of 197 patients. *Digestion* 1984;29(2):85-90.
- w360** Terano A et al. Rebamipide, a gastro-protective and anti-inflammatory drug, promotes gastric ulcer healing following eradication therapy for *H pylori* in a Japanese population: randomized, double-blind, placebo-controlled trial. *J Gastroenterol* 2007;42:690-93.
- w361** Hahm KB et al. Augmented eradication rates of *Helicobacter pylori* by new combination therapy with lansoprazole, amoxicillin, and rebamipide. *Digest Dis Sci* 1998;43(2):235-40.
- w362** Fujioka T et al. Effects of rebamipide, a gastro-protective drug on the *Helicobacter pylori* status and inflammation in the gastric mucosa of patients with gastric ulcer: a randomized double-blind placebo-controlled multicentre trial. *Aliment Pharmacol Ther* 2003;18(Suppl.1):146-52.
- w363** Sawaguchi M et al. Role of mucosal-protective agents, rebamipide and polaprezinc, in post-gastric endoscopic submucosal dissection ulcer healing A randomized controlled study. *Gastrointestinal Endoscopy* 2011;(1):AB424.
- w364** Kato T et al. Clinical trial: rebamipide promotes gastric ulcer healing by proton pump inhibitor after endoscopic submucosal dissection—a randomized controlled study. *J Gastroenterology* 2010;45(3):285-90.
- w365** Fujiwara S et al. (2011). A randomized controlled trial of rebamipide plus rabeprazole for the healing of artificial ulcers after endoscopic submucosal dissection. *J Gastroenterology* 46(5):595-602.
- w366** Nebiki H et al. Effect of rebamipide on *Helicobacter pylori* infection in patients with peptic ulcer. *Digest Dis Sci* 1998;43(Suppl.9):203-6.
- w367** Higuchi K et al. Rebamipide prevents recurrence of gastric ulcers without affecting *Helicobacter pylori* status. *Digest Dis Sci* 1998;43(Suppl.9):99-106.
- w368** Caldwell JR et al. Endoscopic evaluation of Roprositol in the management of non-steroidal anti-inflammatory drug-induced gastritis: an interim analysis. *Scand J Gastroentero* 1989;24(Suppl.164):239-41.
- w369** Boucekine T et al. Treatment of duodenal ulcer with roprositol: a randomized multicentre double-blind study. *Scand J Gastroentero* 1989;24(Suppl.164):191-3.
- w370** Benvestito V et al. Therapeutic use of roprositol, 600 micrograms o.d., in duodenal peptic ulcer during its active uncomplicated phase. *Minerva Diet Gastroentero* 1988;34(3):191-5. [Italian]
- w371** Yilmaz E et al. Cimetidine therapy for warts: a placebo-controlled, double-blind study. *J Am Acad Dermatol* 1996;34(6):1005-7.
- w372** Bergstrand H et al. Effects of long-term treatment with low dose cimetidine on allergen-induced airway responses and selected immunological parameters in atopic asthmatics. *Allergy* 1985;40(3):187-97.
- w373** Hui WM et al. Maintenance therapy for duodenal ulcer: a randomized controlled comparison of seven forms of treatment. *Am J Med* 1992;92(3):265-74.
- w374** Furman D et al. A double-blind trial comparing high dose liquid antacid to placebo and cimetidine in improving symptoms and objective parameters in gastroesophageal reflux. *Gastroenterology* 1982;82(5 II):1062.
- w375** Kibblewhite DJ et al. A double-blind controlled study of the efficacy of cimetidine in the treatment of the cervical symptoms of gastroesophageal reflux. *J Otolaryngol* 1990;19(2):103-9.
- w376** Welch RW et al. Reduction of aspirin-induced gastrointestinal bleeding with cimetidine. *Gastroenterology* 1978;74(2):459-63.
- w377** Roth SH et al. Cimetidine therapy in nonsteroidal anti-inflammatory drug gastropathy. Double-blind long-term evaluation. *Arch Intern Med* 1987;147(10):1798-801.
- w378** Wu S-X et al. Different dosages of azelastine and in combination of cimetidine in the treatment of chronic urticaria. *J Clin Derm* 2008;37(3):194-6. [Chinese]
- w379** Sonnenberg A et al. Prevention of duodenal ulcer recurrence with cimetidine (author's transl). *Deut Med Wochenschr* 1979;104(20):725-30. [German]
- w380** Kokron O et al. Randomised study in metastatic renal cell cancer: Coumarin versus coumarin + cimetidine. *J Irish Coll Phys S* 1993;22(Suppl.1):10-1.
- w381** Lööf L et al. Psychological group counseling for the prevention of ulcer relapses. A controlled randomized trial in duodenal and prepyloric ulcer disease. *J Clin Gastroenterol* 1987;9(4):400-7.
- w382** Becker U et al. Relapse prevention of duodenal ulcers with trimipramine, cimetidine, or placebo. A double-blind comparison. *Scand J Gastroentero* 1984;19(3):405-10.
- w383** Sontag S et al. Cimetidine, cigarette smoking, and recurrence of duodenal ulcer. *New Engl J Med* 1984;311(11):689-93.
- w384** Kinloch JD et al. The effect of cimetidine on the maintenance of healing of gastric ulceration. *Postgrad Med J* 1984;60(708):665-7.
- w385** Visconti GP et al. Long-term trial of pirenzepine, cimetidine and placebo in the management of duodenal ulcer. *Curr Ther Res Clin E* 1983;34(5):853-6.
- w386** Moshal MG et al. Pirenzepine, cimetidine and placebo in the long-term treatment of duodenal ulceration. A comparative study. *S Afr Med J* 1982;62(1):12-4.
- w387** Bardhan KD et al. Antacid maintenance therapy in the prevention of duodenal ulcer relapse. *Gut* 1988;29(12):1748-54.
- w388** Eichenberger PM et al. Treatment and relapse prophylaxis of duodenal ulcer with pirenzepine and cimetidine. *Scand J Gastroenterol* 1982;17(72)(Suppl.):197-206.
- w389** Ubiluz R. Prevention of duodenal ulcer recurrence. A double-blind study of cimetidine (Tagamet). *Clin Trials J* 1982;19(3):150-61.
- w390** Sontag S et al. Three cimetidine dose schedules versus placebo in preventing duodenal ulcer recurrences. A multicenter double blind study. *Gastroenterology* 1981;80(5 II):1290.
- w391** Da Silva EP et al. Long-term treatment of gastric ulcer with cimetidine. *Clin Ther* 1981;4(1):24-31.
- w392** Salera M et al. Long-term effects and after-effects of cimetidine in duodenal ulcer patients. *Ital J Gastroenterol* 1979;11(2):49-52.
- w393** Cocco AE et al. A multi-center study of the recurrence of duodenal ulcer on long-term treatment with cimetidine. *Gastroenterology* 1981;80(5 II):1125.
- w394** Bianchi Porro G et al. Long-term prophylactic treatment with cimetidine in duodenal ulceration. *Ital J Gastroenterol* 1979;11(4):181-3.
- w395** Massarrat S et al. Long term prophylaxis of duodenal ulcer with cimetidine. *Deut Med Wochenschr* 1982;107(28):1085-8. [German]
- w396** Dew MJ et al. Maintenance therapy for duodenal ulcer—a trial comparing cimetidine with a prostaglandin synthetase promoter. *J Clin Hosp Pharm* 1984;9(4):357-9.
- w397** Fitzpatrick WJ et al. Bedtime cimetidine maintenance treatment: optimum dose and effect on subsequent natural history of duodenal ulcer. *Gut* 1982;23(3):239-42.
- w398** Berstad A et al. Maintenance treatment of duodenal ulcer patients with a single bedtime dose of cimetidine. *Scand J Gastroentero* 1979;14(7):827-31.
- w399** Broor SL et al. Duodenal ulcer: maintenance treatment with cimetidine. *Indian J Gastroen* 1983;2(2):81-2.
- w400** Hentschel E et al. Effect of cimetidine treatment in the prevention of gastric ulcer relapse: a one year double blind multicentre study. *Gut* 1983;24(9):853-6.
- w401** Piper DW et al. The effect of maintenance cimetidine therapy on the medical, social and economic aspects of patients with chronic gastric ulcers. A placebo-controlled prospective study. *Med J Australia* 1986;145(8):400-3.
- w402** Pym B et al. Cost-effectiveness of cimetidine maintenance therapy in chronic gastric and duodenal ulcer. *Gastroenterology* 1990;99(1):27-35.
- w403** Sonnenberg A et al. Predictors of duodenal ulcer healing and relapse. *Gastroenterology* 1981;81(6):1061-7.
- w404** Marks IN et al. A maintenance regimen of sucralfate 2g at night for reduced relapse rate in duodenal ulcer disease. A one-year follow-up study. *Am J Med* 1989;86(6A):136-40.
- w405** Murray FE et al. Management of reflux oesophagitis: role of weight loss and cimetidine. *Irish J Med Sci* 1991;160(1):2-4.
- w406** Kaul B et al. Gastroesophageal reflux disease. Acute and maintenance treatments with cimetidine. *Scand J Gastroentero* 1986;21(2):139-45.
- w407** Kumar N et al. Long term behaviour of healed duodenal ulcer with and without maintenance therapy. *Journal of the Association of Physicians of India* 1990;38(Suppl.1):707-11.
- w408** Salim AS et al. Sulphydryl-containing agents and the prevention of duodenal ulcer relapse. *Pharmacology* 1993;46(5):281-8.
- w409** Salim AS et al. The relationship between *Helicobacter pylori* and oxygen-derived free radicals in the mechanism of duodenal ulceration. *Internal Med* 1993;32(5):359-64.
- w410** Young MD et al. Efficacy of once-daily cimetidine in preventing recurrence of duodenal ulcer. *Clin Ther* 1989;11(4):529-38.
- w411** Takemoto T et al. Efficacy of sucralfate in the prevention of recurrence of peptic ulcer—double blind multicenter study with cimetidine. *Scand J Gastroentero* 1987;140(Suppl.):49-60.
- w412** Rohner HG et al. Long term cimetidine therapy for the prevention of recurring peptic ulcer: a multicenter study. *Zeitschrift fur Gastroenterologie* 1985;23(8):403-11. [German]
- w413** Burland WL et al. Cimetidine treatment for the prevention of recurrence of duodenal ulcer: an international collaborative study. *Postgrad Med J* 1980;56(653):173-6.
- w414** Gray GR et al. Long-term cimetidine in the management of severe duodenal ulcer dyspepsia. *Gastroenterology* 1978;74(2):397-401.
- w415** Salim AS. Oxygen-derived free radicals and the prevention of duodenal ulcer relapse: A new approach. *Am J Med Sciences* 1990;300(1):1-6.
- w416** Jean F et al. Maintenance therapy of ulcer disease. Comparative multicenter study of sucralfate, cimetidine and a placebo. *Rev Med Interne* 1985;6(3):321-6. [French]
- w417** Leao GC et al. Cimetidine in the treatment of gastric ulcer. *Arq Gastroenterol* 1980;17(2):63-8. [Portuguese]
- w418** Aubia J et al. Dialysis pruritus: Effect of cimetidine. *J Dialysis* 1980;4(4):141-5.
- w419** Lai KN et al. Effect of long-term cimetidine treatment on left ventricular function in haemodialysis patients with active hyperparathyroidism. *Brit J Clin Pharmacol* 1982;13(5):693-7.
- w420** Paoluzi P et al. Incompletely and completely healed duodenal ulcers' outcome in maintenance treatment: a double blind controlled study. *Gut* 1985;26(10):1080-5.
- w421** Libeskind M et al. Maintenance treatment of patients with healed peptic ulcer with sucralfate, placebo and cimetidine. *Scand J Gastroentero* 1983;83(Suppl.):69-70.
- w422** Stoa-Birketvedt G et al. Effect of cimetidine suspension on appetite and weight in overweight subjects. *Brit Med J* 1993;306(6885):1091-3.
- w423** Rasmussen MH et al. Cimetidine suspension as adjuvant to energy restricted diet in treating obesity. *Brit Med J* 1993;306(6885):1093-6.



## References for trials listed in Webtables 1-7

- w424** Langman MJ et al. Prospective, double-blind, placebo-controlled randomized trial of cimetidine in gastric cancer. *British Stomach Cancer Group. Brit J Cancer* 1999;81(8):1356-62.
- w425** Huang W-H et al. Cimetidine as adjuvant treatment in rectal cancer. *Chinese J Cancer Prevent & Treat* 2007;14(8):623-4. [Chinese]
- w426** Macphee GJ et al. Effects of cimetidine on carbamazepine auto- and hetero-induction in man. *Brit J Clin Pharmacol* 1984;18(3):411-9.
- w427** Thilagarajah R et al. Oral cimetidine gives effective symptom relief in painful bladder disease: A prospective, randomized, double-blind placebo-controlled trial. *BJU Int* 2001;87(3):207-212.
- w428** La Brooy SJ et al. Cimetidine in the maintenance treatment of gastric ulceration (GU). *Hepato-Gastroenterol* 1980;27(Suppl.):E26.
- w429** Farup PG et al. Low-dose antacids versus 400 mg cimetidine twice daily for reflux oesophagitis. A comparative, placebo-controlled, multicentre study. *Scand J Gastroentero* 1990;25(3):315-20.
- w430** Danielsson A et al. Effect of fifteen months of double-blind treatment with cimetidine and placebo on peptic ulcer recurrence. *Eur J Clin Pharmacol* 1981;19(5):335-41.
- w431** Frank WO et al. Reduction of indomethacin induced gastroduodenal mucosal injury and gastrointestinal symptoms with cimetidine in normal subjects. *J Rheumatol* 1989;16(9):1249-52.
- w432** Barr GD et al. A two-year prospective controlled study of maintenance cimetidine and gastric ulcer. *Gastroenterology* 1983;85(1):100-4.
- w433** Korman MG et al. Relapse of duodenal ulcer after cessation of long-term cimetidine treatment. A double-blind controlled study. *Digest Dis Sci* 1980;25(2):88-91.
- w434** Jensen KG et al. Long-term treatment of peptic ulcer with cimetidine (Tagamet). A controlled trial. *Uges Laeger* 1980;142(51):3367-9. [Danish]
- w435** Kang JY et al. The use of long term cimetidine in the prevention of gastric ulcer relapse: Double blind trial. *Aust NZ J Med* 1980;10(1):111.
- w436** Nyren O et al. Absence of therapeutic benefit from antacids or cimetidine in non-ulcer dyspepsia. *New Engl J Med* 1986;314(6):339-43.
- w437** Bardhan KD et al. Double-blind comparison of cimetidine and placebo in the maintenance of healing of chronic duodenal ulceration. *Gut* 1979;20(2):158-62.
- w438** Dronfield MW et al. Controlled trial of maintenance cimetidine treatment in healed duodenal ulcer: short and long-term effects. *Gut* 1979;20(6):526-30.
- w439** Bijlsma JW et al. Treatment of endoscopy-negative NSAID-induced upper gastrointestinal symptoms with cimetidine: an international multicentre collaborative study. *Aliment Pharm Therap* 1988;2(Suppl.):83.
- w440** Anderson J et al. Effect of H1- and H2-receptor antagonists on sputum volume and lung function in patients with generalized bronchiectasis. *Brit J Dis Chest* 1985;79(3):272-4.
- w441** Blackwood WS et al. Prevention by bedtime cimetidine of duodenal-ulcer relapse. *Lancet* 1978;311(8065):626-7.
- w442** Bodemar G et al. Short- and long-term treatment with cimetidine in peptic ulcer disease and the pharmacokinetics of cimetidine. *Scand J Gastroentero* 1979;55(Suppl.):96-106.
- w443** Hetzel DJ et al. Cimetidine treatment of duodenal ulceration: short term clinical trial and maintenance study. *Gastroenterology* 1978;74:389-92.
- w444** Gudmand-Hoyer E et al. Prophylactic effect of cimetidine in duodenal ulcer disease. *Brit Med J* 1978;1(6120):1095-7.
- w445** Birger Jensen K et al. Prophylactic effect of cimetidine in gastric ulcer patients. *Scand J Gastroentero* 1979;14(2):175-6
- w446** Colle M et al. Plasma prolactin, sex steroids and gastrin in human volunteers treated for 2 weeks with therapeutic doses of cimetidine or the new histamine H2-receptor antagonist ramixotidine (CM 57755A). *Eur J Clin Pharmacol* 1988;35(5):529-34.
- w447** Matsumoto S. The effect of cimetidine as BRM - Adjuvant immuno-chemotherapy for colorectal carcinoma. [Japanese]. *Biotherapy* 1996;10(3):511-5.
- w448** Johnsson F et al. Cimetidine improves GERD symptoms in patients selected by a validated GERD questionnaire. *Aliment Pharm Therap* 1993;7(1):81-6.
- w449** Hetzel DJ et al. Prevention of duodenal ulcer relapse by cimetidine: a one-year double-blind trial. *Med J Australia* 1979;1(11):529-31.
- w450** Hansky J et al. Long-term cimetidine in duodenal ulcer disease. *Digest Dis Sci* 1979;24(6):465-7.
- w451** Mekel RC et al. Long-term treatment with cimetidine. *S Afr Med J* 1978;26:1089-91.
- w452** Nesland AA et al. Effect of cimetidine in patients with non-ulcer dyspepsia and erosive prepyloric changes. *Scand J Gastroentero* 1985;20(5):629-35.
- w453** Svendsen LB et al. Cimetidine as an adjuvant treatment in colorectal cancer. A double-blind, randomized pilot study. *Dis Colon Rectum* 1995;38(5):514-8.
- w454** Talley NJ et al. Randomized, double-blind, placebo-controlled crossover trial of cimetidine and pirenzepine in nonulcer dyspepsia. *Gastroenterology* 1986;91(1):149-56.
- w455** Singal AK et al. Cimetidine in the treatment of non-ulcer dyspepsia: results of a randomized double-blind, placebo-controlled study. *Curr Med Res Opin* 1989;11(6):390-7.
- w456** Riemann JF et al. Cimetidine suspension in patients with stage 0 gastro-oesophageal reflux disease. *Aliment Pharm Therap* 1991;5(2):191-7.
- w457** Rugstad HE et al. Effect of cimetidine on gastrointestinal symptoms in patients taking nonsteroidal anti-inflammatory drugs. *Scand J Rheumatol* 1994;23(4):177-82.
- w458** Gotthard R et al. Treatment with cimetidine, antacid, or placebo in patients with dyspepsia of unknown origin. *Scand J Gastroentero* 1988;23(1):7-18.
- w459** Lee SH et al. Plantar warts of defined aetiology in adults and unresponsiveness to low dose cimetidine. *Australasian Journal of Dermatology*. 2001;42(3):220-1.
- w460** Tonnesen H et al. Effect of cimetidine on survival after gastric cancer. *Lancet* 1988;2(8618):990-2.
- w461** Carpenter GB et al. Evaluation of combined H1- and H2-receptor blocking agents in the treatment of seasonal allergic rhinitis. *J Allergy Clin Immun* 1983;71(4):412-7.
- w462** Mackinnon M et al. Cimetidine in the management of symptomatic patients and duodenitis. A double-blind controlled trial. *Digest Dis Sci* 1982;27(3):217-9.
- w463** Niv Y et al. Treatment of duodenitis with cimetidine: A clinical, endoscopic, and histologic study. *J Clin Gastroenterol* 1990;12(6):628-32.
- w464** Rune SJ et al. Recurrence of duodenal ulcer pain after treatment with cimetidine for four and eight weeks. *Gut* 1980;21(2):151-3.
- w465** Bennett JR et al. Cimetidine in reflux oesophagitis. *Hepato-Gastroenterol* 1980;27(Suppl.):E5.
- w466** Willing RL et al. Cimetidine and duodenitis - a placebo controlled double blinded study of the effect of cimetidine on the endoscopic and histological appearances of duodenitic mucosa. *Gastroenterology* 1980;78(5 II):1291.
- w467** Camarri E et al. Double-blind placebo controlled cross-over study on cimetidine-prophylactic effect in patients under steroid treatment. Preliminary data. *Int J Clin Pharm Th Tox* 1980;18(6):258-60.
- w468** Breen KJ et al. Treatment of reflux oesophagitis. A randomized, controlled evaluation of cimetidine. *Med J Australia* 1983;2(11):555-8.
- w469** Hamid J et al. The effect of cimetidine on immunological parameters in Crohn's disease: a double blind trial. *Immunol Lett* 1983;6(6):293-8.
- w470** Kelbaek H et al. Controlled clinical trial of treatment with cimetidine for non-ulcer dyspepsia. *Acta Medica Scandinavica* 1985;217(3):281-7.
- w471** Machell RJ et al. Cimetidine in the prevention of gastric ulcer relapse. *Postgrad Med J* 1979;55(644):393-5.
- w472** Brown P et al. Cimetidine in the treatment of reflux oesophagitis. *Med J Australia* 1979;2(2):96-7.
- w473** Bardhan KD et al. Does treatment with cimetidine extended beyond initial healing of duodenal ulcer reduce the subsequent relapse rate? *Brit Med J* 1982;284(6316):621-3.
- w474** Popoola AO et al. Clinical response and gastroduodenal mucosa morphology in cimetidine treated Nigerian patients duodenal ulcer and antroduodenitis. *Nigerian Med J* 1978;8(3):175-81.
- w475** Sillero C et al. Controlled trial of cimetidine in acute pancreatitis. *Eur J Clin Pharmacol* 1981;21(1):17-21.
- w476** Perez De OC et al. Controlled treatment of acute pancreatitis. Double-blind trial with cimetidine. *Revista Clin Esp* 1980;158(6):263-6. [Spanish]
- w477** Stoa-Birketvedt G et al. Cimetidine reduces weight and improves metabolic control in overweight patients with Type 2 diabetes. *Int J Obesity* 1998;22(11):1041-5.
- w478** Bendayan R et al. Lack of effect of cimetidine on cigarette smoking. *Eur J Clin Pharmacol* 1993;44(1):51-5.
- w479** Bright-Asare P et al. Cimetidine, metoclopramide, or placebo in the treatment of symptomatic gastroesophageal reflux. *J Clin Gastroenterol* 1980;2(2):149-56.
- w480** Layne E et al. Does cimetidine protect against GI bleeding in neurological/neurosurgical patients with steroids? *Gastroenterology* 1981;80(5 II):1205.
- w481** Cohen CJ et al. Lack of effect of cimetidine on lymphocyte subsets in patients infected with human immunodeficiency virus type 1. *Clin Infect Dis* 1996;23(5):1049-54.
- w482** Ferguson R et al. Cimetidine in treatment of reflux oesophagitis with peptic stricture. *Brit Med J* 1979;2(6188):472-4.
- w483** Monroe EW et al. Combined H1 and H2 antihistamine therapy in chronic urticaria. *Arch Dermatol* 1981;117(7):404-7.
- w484** Behar J et al. Cimetidine in the treatment of symptomatic gastroesophageal reflux: a double blind controlled trial. *Gastroenterology* 1978;74(2:Pt 2):441-8.
- w485** Greenblatt DJ et al. Clinical importance of the interaction of diazepam and cimetidine. *New Engl J Med* 1984;310(25):1639-43.
- w486** Hoogwerf BJ et al. Effect of cimetidine on plasma lipids and lipoproteins. *Clin Pharmacol Ther* 1984;36(2):217-20.
- w487** Li Y et al. Effects of perioperative cimetidine administration on natural killer cells in patients with gastrointestinal cancer. *Chinese J Cancer Res* 1999;11(1):70-3.
- w488** Larrain A et al. Medical and surgical treatment of nonallergic asthma associated with gastroesophageal reflux. *Chest* 1991;99(6):1330-5.
- w489** Diller G and Orfanos CE. Management of idiopathic urticaria with H1 + H2 antagonists. A crossover double blind long-term study. *Zeitschrift fur Hautkrankheiten* 1983;58(11):785-93. [German]
- w490** Shanehsaz S. M et al. 2015 A comparative study between the efficacy of oral cimetidine and low-dose systemic meglumine antimoniate (MA) with a standard dose of systemic MA in the treatment of cutaneous leishmaniasis. *International Journal of Dermatology* 54(7):834-838.
- w491** Lissak A et al. Treatment of hirsutism with cimetidine: a prospective randomized controlled trial. *Fertil Steril* 1989;51(2):247-50.
- w492** Lepsins G et al. Treatment of reflux oesophagitis with cimetidine (author's transl). *Deut Med Wochenschr* 1979;104(25):901-6. [German]
- w493** Wallach D et al. Cimetidine versus placebo in the treatment of psoriasis. *Dermatologica* 1982;165(3):197-203.
- w494** Fiasse R et al. Controlled trial of cimetidine in reflux esophagitis. *Digest Dis Sci* 1980;25(10):750-5.

## References for trials listed in Webtables 1-7

- w495** Festen HP et al. Cimetidine in the treatment of severe ulcerative reflux oesophagitis; results of an 8-week double-blind study and of subsequent long-term maintenance treatment. *Neth J Med* 1980;23(6):237-40.
- w496** Bleehen SS et al. Cimetidine and chlorpheniramine in the treatment of chronic idiopathic urticaria: a multi-centre randomized double-blind study. *Brit J Dermatol* 1987;117(1):81-8.
- w497** Commens CA et al. Cimetidine in chronic idiopathic urticaria: a randomized double-blind study. *Brit J Dermatol* 1978;99(6):675-9.
- w498** Cook J et al. Lack of effect of H2 blockade in chronic urticaria. *Brit J Dermatol* 1979;101(Suppl.):2.
- w499** Palmer RH et al. Cimetidine QID and BID in rapid heartburn relief and healing of lesions in gastroesophageal reflux disease. *Clin Ther* 1993;15(6):994-1001.
- w500** Sitsen JM et al. Concomitant use of mirtazapine and cimetidine: a drug-drug interaction study in healthy male subjects. *Eur J Clin Pharmacol* 2000;56(5):389-94.
- w501** Powell-Jackson P et al. Effect of cimetidine in symptomatic gastro-oesophageal reflux. *Lancet* 1978;2(8099):1068-9.
- w502** Wesdorp E et al. Oral cimetidine in reflux esophagitis: a double blind controlled trial. *Gastroenterology* 1978;74(5 Pt 1):821-4.
- w503** Palmer RH et al. Cimetidine 800mg twice daily for healing erosions and ulcers in gastroesophageal reflux disease. *J Clin Gastroenterol* 1990;12(Suppl.):29-34.
- w504** Fitzpatrick WJ et al. Ileal resection: effect of cimetidine and taurine on intrajejunal bile acid precipitation and lipid solubilisation. *Gut* 1986;27(1):66-72.
- w505** Matthews CAN et al. The effect of H1 and H2 histamine antagonists on symptomatic dermatographism. *Brit J Dermatol* 1979;101:57-61.
- w506** Jameson MB et al. A randomized, placebo-controlled, double-blind phase II trial of peri-operative cimetidine in early colorectal cancer. *Journal of Clinical Oncology Conference*. 2014;32(3 SUPPL. 1).
- w507** Baglioni A et al. Famotidine versus placebo in prevention of the recurrence of duodenal ulcer disease. A multicenter study in Germany, Austria and Italy. *Z Gastroenterol* 1985;23(12):665-9. [German]
- w508** Berlin RG et al. Nocturnal therapy with famotidine for 1 year is effective in preventing relapse of gastric ulcer. *Aliment Pharm Therap* 1991;5(2):161-71.
- w509** Texter EC et al. Maintenance therapy of duodenal ulcer with famotidine. A multicenter United States study. *Am J Med* 1986;81(4B):25-32.
- w510** Zaterka S et al. Famotidine in the short and long-term treatment of duodenal ulcer. *Acta Gastroenterologica Latinoamericana* 1988;18(2):115-21. [Spanish].
- w511** Hongo M et al. A randomized, double-blind, placebo-controlled clinical study of the histamine H2-receptor antagonist famotidine in Japanese patients with nonerosive reflux disease. *J Gastroenterol* 2008;43(6):448-56.
- w512** Taha AS et al. Famotidine for the prevention of peptic ulcers and oesophagitis in patients taking low-dose aspirin (FAMOUS): a phase III, randomised, double-blind, placebo-controlled trial. *Lancet* 2009;374:119-25.
- w513** Taha AS et al. Famotidine for the prevention of gastric and duodenal ulcers caused by non-steroidal anti-inflammatory drugs. *New Engl J Med* 1996;334(22):1435-9.
- w514** Kato M et al. Randomized, double-blind, placebo-controlled crossover trial of famotidine in patients with functional dyspepsia. *Aliment Pharm Therap* 2005;21(Suppl.2):27-31.
- w515** Poyurovsky M et al. The effect of famotidine addition on olanzapine-induced weight gain in first-episode schizophrenia patients: A double-blind placebo-controlled pilot study. *Eur Neuropsychopharm* 2003;14(4):332-6.
- w516** Schwartz JI et al. Novel oral medication delivery system for famotidine. *J Clin Pharmacol* 1995;35(4):362-7.
- w517** Robinson M et al. Famotidine (20mg) b.d. relieves gastroesophageal reflux symptoms in patients without erosive oesophagitis. *Famotidine/GERD Investigation Group. Aliment Pharm Therap* 1991;5(6):631-43.
- w518** Simon TJ et al. Randomized, placebo-controlled comparison of famotidine 20mg b.d. or 40mg b.d. in patients with erosive oesophagitis. *Aliment Pharm Therap* 1994;8(1):71-9.
- w519** Simon TJ et al. Acid suppression by famotidine 20mg twice daily or 40mg twice daily in preventing relapse of endoscopic recurrence of erosive esophagitis. *Clin Ther* 1995;17(6):1147-56.
- w520** Simon TJ et al. Effect of normalization of esophageal acid reflux time on recurrence of erosive esophagitis: Randomized, placebo-controlled trial of two doses of famotidine. *Curr Ther Res Clin E* 1996;57(1):16-25.
- w521** Liu CC et al. Maintenance treatment is not necessary after *Helicobacter pylori* eradication and healing of bleeding peptic ulcer: a 5-year prospective, randomized, controlled study. *Arch Intern Med* 2003;163(17):2020-4.
- w522** Sabesin SM et al. Famotidine relieves symptoms of gastroesophageal reflux disease and heals erosions and ulcerations: Results of a multicenter, placebo-controlled, dose-ranging study. *Arch Intern Med* 1991;151(12):2394-400.
- w523** Ohara S et al. Efficacy evaluation of lafutidine for mild reflux esophagitis in Japanese patients. *J Jpn Soc Gastroenterol* 2010;107(4):588-97. [Japanese]
- w524** Ohara S et al. A double-blind, controlled study comparing lafutidine with placebo and famotidine in Japanese patients with mild reflux esophagitis. *J Gastroenterol* 2010;45(12):1219-27.
- w525** Hsu P.I et al. (2015). Can famotidine prevent recurrent peptic ulcer in platelet ADP-receptor antagonist users?—a randomized-controlled, double-blind, and double-dummy trial. *J Gastroenterol Hepatol* 30;153.
- w526** Hsu PI. Can histamine-2 receptor antagonist prevent recurrent peptic ulcer in thienopyridine users? *J Gastroenterol Hepatol*. 2013;28:64.
- w527** Laine L, Kivitz AJ, Bello AE, Grahm AY, Schiff MH, Taha AS. Double-blind randomized trials of single-tablet ibuprofen/high-dose famotidine vs. ibuprofen alone for reduction of gastric and duodenal ulcers. *American Journal of Gastroenterology*. 2012;107(3):379-86.
- w528** Hudson N et al. Famotidine for healing and maintenance in nonsteroidal anti-inflammatory drug-associated gastroduodenal ulceration. *Gastroenterology* 1997;112(6):1817-22.
- w529** Marrero JM et al. Effect of famotidine on oesophageal sensitivity in gastro-oesophageal reflux disease. *Gut* 1994;35(4):447-50.
- w530** Mestre TA et al. A pilot study evaluating the histamine H2 antagonist, famotidine, for levodopa-induced dyskinesia in Parkinson's disease. *Mov Disord* 2014;29:S250-S1.
- w531** Meskanen K et al. A randomized clinical trial of histamine 2 receptor antagonism in treatment-resistant schizophrenia. *J Clin Psychopharmacol* 2013;33(4):472-8.
- w532** Namikawa T et al. Feasibility study of supportive care using lafutidine, a histamine H2 receptor antagonist, to prevent gastrointestinal toxicity during chemotherapy for gastric cancer. *Anticancer Research* 2014;34(12):7297-301.
- w533** Kato M et al. Lafutidine prevents low-dose aspirin and loxoprofen induced gastric injury: a randomized, double-blinded, placebo controlled study. *J Gastroenterol Hepatol*. 2010;25(10):1631-5.
- w534** Carlson MC et al. H2 histamine receptor blockade in the treatment of Alzheimer disease: a randomized, double-blind, placebo-controlled trial of nizatidine. *Alz Dis Assoc Dis* 2002;16(1):24-30.
- w535** Cerulli MA et al. Nizatidine as maintenance therapy of duodenal ulcer disease in remission. *Scand J Gastroenterol* 1987;136(Suppl.):79-83.
- w536** Rampal P et al. A quality of life study in five hundred and eighty-one duodenal ulcer patients. Maintenance versus intermittent treatment with nizatidine. *Scand J Gastroenterol* 1994;206(Suppl.):44-51.
- w537** Di Mario F et al. Nizatidine 150mg at night in the prophylaxis of gastric ulcer relapse: a 12-month prospective, randomized, double-blind multicentre study versus placebo. *Eur J Gastroen Hepat* 1993;5(2):97-102.
- w538** Levine LR et al. Nizatidine prevents peptic ulceration in high-risk patients taking nonsteroidal anti-inflammatory drugs. *Arch Intern Med* 1993;153(21):2449-54.
- w539** Cavazzoni P et al. Nizatidine for prevention of weight gain with olanzapine: A double-blind placebo-controlled trial. *Eur Neuropsychopharm* 2003;13(2):81-5.
- w540** Dammann HG et al. Effective prevention of piroxicam-induced lesions of the gastric mucosa with nizatidine. *Z Gastroenterol* 1990;28(2):94-6. [German]
- w541** Hansen JM et al. Placebo-controlled trial of cisapride and nizatidine in unselected patients with functional dyspepsia. *Am J Gastroenterol* 1998;93(3):368-74.
- w542** Cloud ML et al. Nizatidine versus placebo in gastroesophageal reflux disease: a 12-week, multicenter, randomized, double-blind study. *Am J Gastroenterol* 1991;86(12):1735-42.
- w543** Atmaca M et al. Nizatidine treatment and its relationship with leptin levels in patients with olanzapine-induced weight gain. *Hum Psychopharm* 2003;18(6):457-61.
- w544** Atmaca M et al. Nizatidine for the treatment of patients with quetiapine-induced weight gain. *Hum Psychopharm* 2004;19(1):37-40.
- w545** Cloud ML et al. Nizatidine versus placebo in gastroesophageal reflux disease. A six-week, multicenter, randomized, double-blind comparison. *Digest Dis Sci* 1992;37(6):865-74.
- w546** Dobrilla G et al. Treatment of erosive reflux oesophagitis: a double-blind multicentre trial with nizatidine 300mg b.i.d. versus placebo. *Ital J Gastroenterol* 1992;24(6):338-41.
- w547** Koskenpato J et al. Nizatidine and gastric emptying in functional dyspepsia. *Digest Dis Sci* 2008;53(2):352-7.
- w548** Quik RF et al. A comparison of two doses of nizatidine versus placebo in the treatment of reflux oesophagitis. *Aliment Pharm Therap* 1990;4(2):201-11.
- w549** Cloud ML et al. Healing and recurrence of active duodenal ulcer with nizatidine. *Clin Pharmacol Ther* 1989;46(3):310-6.
- w550** Assuncao SS et al. Weight gain management in patients with schizophrenia during treatment with olanzapine in association with nizatidine.[Erratum appears in *Rev Bras Psiquiatr*. 2007;29(1):v]. *Revista Brasileira de Psiquiatria* 2006;28(4):270-6.
- w551** Guerreiro S et al. [Prospective study of duodenal ulcer. Analysis of prognostic factors]. *Acta Med Port* 1991;4(4):191-7. [Portuguese]
- w552** Murakami K et al. Maintenance therapy with H2-receptor antagonist until assessment of *Helicobacter pylori* eradication can reduce recurrence of peptic ulcer after successful eradication of the organism: prospective randomized controlled trial. *J Gastroen Hepatol* 2006;21(6):1048-53.
- w553** Vakil N et al. The effect of over-the-counter ranitidine 75mg on night-time heartburn in patients with erosive oesophagitis on daily proton pump inhibitor maintenance therapy. *Aliment Pharm Therap* 2006;23(5):649-53.
- w554** Mignon M et al. Intermittent treatment or prevention of recurrence in duodenal ulcer disease? A controlled, double-blind study with one-a-day ranitidine 150 mg for one year. *Gastroen Clin Biol* 1990;14(10):732-8. [French]
- w555** Andrade EO et al. Controlled study of ranitidine for prevention of recurrent duodenal ulcer. *Rev Gastro-ent Mex* 1997;62(2):94-7. [Spanish]
- w556** Kang JY et al. Dietary supplementation with pectin in the maintenance treatment of duodenal ulcer. A controlled study. *Scand J Gastroenterol* 1988;23(1):95-9.

## References for trials listed in Webtables 1-7

- w557** Piai G et al. The influence of severe bulb deformity on duodenal ulcer relapse. *Hepato-Gastroenterol* 1990;37(1):131-4.
- w558** Van Deventer GM et al. A randomized study of maintenance therapy with ranitidine to prevent the recurrence of duodenal ulcer. *New Engl J Med* 1989;320(17):1113-9.
- w559** Kozarek R et al. Maintenance therapy with ranitidine following healing of acute duodenal ulcer. *Curr Ther Res Clin E* 1985;38(2):341-51.
- w560** Alstead EM et al. Ranitidine in the prevention of gastric and duodenal ulcer relapse. *Gut* 1983;24(5):418-20.
- w561** Koelz HR et al. Healing and relapse of reflux esophagitis during treatment with ranitidine. *Gastroenterology* 1986;91(5):1198-205.
- w562** Boyd EJS et al. Safety of ranitidine maintenance treatment of duodenal ulcer. *Scand J Gastroentero* 1984;19(3):394-400.
- w563** Di Mario F et al. Ranitidine in long-term duodenal ulcer treatment: a multicentre trial. *Digestion* 1982;24(4):260-3.
- w564** Dawson J et al. Effect of ranitidine and cimetidine on gastric ulcer healing and recurrence. *Scand J Gastroentero* 1984;19(5):665-8.
- w565** Di Mario F et al. Long-term treatment of patients with gastric ulcer: Sucralfate versus ranitidine versus no treatment: An interim report at the end of year 1 of a 3-year multicenter. *Curr Ther Res Clin E* 1994;55(9):1117-25.
- w566** Jensen DM et al. A controlled study of ranitidine for the prevention of recurrent haemorrhage from duodenal ulcer. *New Engl J Med* 1994;330(6):382-6.
- w567** Mones J et al. Helicobacter pylori eradication versus one-year maintenance therapy: effect on relapse and gastritis outcome. *Revista Espanola de Enfermedades Digestivas* 2001;93(6):372-89. [Spanish]
- w568** Murray WR et al. Maintenance Ranitidine Treatment after Haemorrhage from a Duodenal Ulcer. A 3-year Study. *Scand J Gastroentero* 1987;23(2):183-7.
- w569** Mekel RC et al. Prevention of duodenal ulcer relapse with ranitidine. *S Afr Med J* 1985;6:385-6.
- w570** Sue SO et al. Effectiveness of ranitidine 150 mg at bedtime as maintenance therapy for healed gastric ulcers. *Clin Ther* 1996;18(6):1175-83.
- w571** Jorde R et al. Ranitidine 150mg at night in the prevention of gastric ulcer relapse. *Gut* 1987;28(4):460-3.
- w572** Ruzsniowski P et al. Two year maintenance treatment of duodenal ulcer disease with ranitidine 150mg: a prospective multicentre randomised study. GEMUD (Groupe d'Etude de la Maladie Ulcereuse Duodenale). *Gut* 1993;34(12):1662-5.
- w573** Manes G et al. Increased risk for Helicobacter pylori recurrence by continuous acid suppression: a randomized controlled study. *Ital J Gastroenterol* 1998;30(1):28-33.
- w574** Zdrenghea D et al. The effect of simvastatin associated with ranitidine and alcohol upon serum lipids. *Romanian Journal of Internal Medicine* 2004;42(1):143-8.
- w575** Hovdenak N et al. Drug prophylaxis in duodenal ulcer disease. A placebo-controlled trial with ranitidine. *Tidsskrift for den Norske Laegeforening* 1987;107(1):29-30. [Norwegian]
- w576** Villalobos JJ et al. The recurrence of duodenal ulcer in patients undergoing treatment with ranitidine and placebo. A multicenter study. *Revista de Gastroenterologia de Mexico* 1991;56(2):65-9. [Spanish]
- w577** Mehta VS et al. Role of ranitidine in negative symptoms of schizophrenia--an open label study. *Asian Journal of Psychiatry*. 2014;12:150-4.
- w578** Tamura S et al. Prospective randomized study on the effect of ranitidine against injection ulcer after endoscopic injection sclerotherapy for esophageal varices. *Am J Gastroenterol* 1991;86(4):477-80.
- w579** Penston JG et al. A placebo-controlled investigation of duodenal ulcer recurrence after withdrawal of long-term treatment with ranitidine. *Aliment Pharm Therap* 1993;7(3):259-65.
- w580** Ehsanullah RSB et al. Prevention of gastroduodenal damage induced by non-steroidal anti-inflammatory drugs: controlled trial of ranitidine. *Brit Med J* 1988;297(6655):1017-21.
- w581** Robinson MG et al. Effect of ranitidine on gastroduodenal mucosal damage induced by nonsteroidal anti-inflammatory drugs. *Digest Dis Sci* 1989;34(3):424-8.
- w582** Van Groenendaal JH et al. The effect of ranitidine on NSAID related dyspeptic symptoms with and without peptic ulcer disease of patients with rheumatoid arthritis and osteoarthritis. *Clin Rheumatol* 1996;15(5):450-6.
- w583** Robinson M et al. Ranitidine prevents duodenal ulcers associated with non-steroidal anti-inflammatory drug therapy. *Aliment Pharm Therap* 1991;5(2):143-50.
- w584** Swift GL et al. Effect of ranitidine on gastroduodenal mucosal damage in patients on long-term non-steroidal anti-inflammatory drugs. *Digestion* 1989;44(2):86-94.
- w585** Berkowitz JM et al. Ranitidine protects against gastroduodenal mucosal damage associated with chronic aspirin therapy. *Arch Intern Med* 1987;147(12):2137-9.
- w586** Nielsen HJ et al. The effect of ranitidine on long-term survival in primary colorectal cancer. A 40 months interim analysis. *GI Can* 1998;2(3):227-33.
- w587** Muller P et al. High-dose ranitidine protects completely stomach and duodenum against piroxicam. An endoscopic double-blind pilot-study. *Z Gastroenterol* 1992;30(12):851-3. [German]
- w588** Muller P et al. Protection from gastroduodenal adverse effects of acetylsalicylic acid with ranitidine. An endoscopic controlled double-blind study of healthy subjects. *Arzneimittel-Forsch* 1991;41(6):638-9. [German]
- w589** Nervi M et al. Usefulness of ranitidine in the treatment of esophagitis caused by gastro-esophageal acid reflux. *Min Diet Gastroent* 1989;35(3):195-9. [Italian]
- w590** Rush DR et al. Clinical effectiveness and quality of life with ranitidine vs placebo in gastroesophageal reflux disease patients: A clinical experience network (CEN) study. *J Fam Practice* 1995;41(2):126-36.
- w591** Kar P et al. Ranitidine versus placebo: A double-blind trial in the management of reflux esophagitis. *Curr Ther Res Clin E* 1990;47(4):731-4.
- w592** Yanagawa A et al. Prophylactic efficacy of the H2-blocker ranitidine against gastroduodenal lesions caused by non-steroidal anti-inflammatory drugs (NSAIDs): Controlled trial study. *Jpn J Rheum* 1991;3(4):275-87.
- w593** Alberts DS et al. Lack of ranitidine effects on cyclophosphamide bone marrow toxicity or metabolism: A placebo-controlled clinical trial. *J Natl Cancer I* 1991;83(23):1739-43.
- w594** Yanagawa A et al. Prophylactic efficacy of ranitidine against gastroduodenal mucosal damage from non-steroidal anti-inflammatory drugs: A randomized placebo-controlled study. *Round Table Series - Roy Soc Med* 1990;(21):97-103.
- w595** Muller P et al. Protective effects of ranitidine in stomach and duodenum against piroxicam. An endoscopically controlled double-blind study. *Arzneimittel-Forsch* 1992;42(12):1492-4. [German]
- w596** Simon B et al. Ranitidine in the therapy of NSAID-induced gastroduodenal lesions. Results of a randomized, placebo-controlled, double-blind study in patients with rheumatic diseases. *Scand J Gastroentero* 1988;23(154)(Suppl.):18-21.
- w597** Primrose JN et al. A prospective randomised controlled study of the use of ranitidine in patients with gastric cancer. *Gut* 1998;42(1):17-9.
- w598** Berenson M et al. Effect of Smoking in a controlled study of ranitidine treatment in Gastroesophageal reflux Disease. *J Clin Gastroenterol* 1987;(5):499-503.
- w599** Robinson MG et al. Do endoscopic findings influence response to H2 antagonist therapy for gastroesophageal reflux disease? *Am J Gastroenterol* 1987;82(6):519-22.
- w600** Saunders JH et al. Dyspepsia: Incidence of non-ulcer disease in a controlled trial of ranitidine in general practice. *Brit Med J* 1986;292(6521):665-8.
- w601** Hendel L et al. Long-term ranitidine in progressive systemic sclerosis (scleroderma) with gastroesophageal reflux. *Scand J Gastroentero* 1986;21(7):799-805.
- w602** Johansson K-E et al. Double-blind crossover study of ranitidine and placebo in gastro-oesophageal reflux disease. *Scand J Gastroentero* 1986;21(7):769-78.
- w603** Muller P et al. Ranitidine in the treatment of non-ulcer dyspepsia. A placebo-controlled study in the Federal Republic of Germany. *Arzneimittel-Forsch* 1994;44(10):1130-2. [German]
- w604** Hegarty JH et al. Prevention de la recurrence de l'oesophagite de reflux. Etude controlee par placebo sur la ranitidine 150mg b.i.d. et 300mg b.i.d. *Can J Gastroenterol* 1997;11(1):83-8. [French]
- w605** Gustavsson S et al. Reflux esophagitis: assessment of therapy effects and observer variation by video documentation of endoscopy findings. *Scand J Gastroentero* 1987;22(5):585-91.
- w606** Fullarton GM et al. The effect of H2-blockade on plasma gastrin concentration in patients with an achlorhydric stomach. *Aliment Pharm Therap* 1992;6(5):557-63.
- w607** Hallerback B et al. Gastro-oesophageal reflux symptoms-clinical findings and effect of ranitidine treatment. *Eur J Surg* 1998;583(Suppl.):6-13.
- w608** Orlowski T et al. The influence of the H-2 receptor antagonist ranitidine on cadaver kidney allograft function. *Int Urol Nephrol* 1986;18(2):205-10.
- w609** Olubuyide IO et al. Non-ulcer dyspepsia in Nigerians clinical and therapeutic results. *Scand J Gastroentero* 1986;124(Suppl.):83-7.
- w610** Sherbaniuk R et al. Ranitidine in the treatment of symptomatic gastroesophageal reflux. *Clin Res* 1984;30(2):289A.
- w611** Nielsen HJ et al. The effect of ranitidine on post-operative infectious complications after elective colorectal surgery. *GI Cancer* 1999;3(2):87-95.
- w612** Wotherspoon HA et al. Randomized controlled trial of an H2-receptor antagonist in gastric cancer. *Brit J Surg* 1997;84(8):1168-9.
- w613** Tan CC et al. Ranitidine reduces phosphate binding in dialysis patients receiving calcium carbonate. *Nephrol Dial Transpl* 1996;11(5):851-3.
- w614** Smith AD et al. Dyspepsia on withdrawal of ranitidine in previously asymptomatic volunteers. *Am J Gastroenterol* 1999;94(5):1209-13.
- w615** Singh K et al. Impact of ranitidine on prognosis after simple closure of perforated duodenal ulcer. *Trop Gastroentero* 1999;20(2):90-2.
- w616** Goy JA et al. Ranitidine and placebo in the treatment of reflux oesophagitis. A double-blind randomized trial. *Med J Australia* 1983;2(11):558-61.
- w617** Wallace MH et al. Randomized, placebo-controlled trial of gastric acid-lowering therapy on duodenal polyposis and relative adduct labeling in familial adenomatous polyposis. *Dis Colon Rectum* 2001;44(11):1585-9.
- w618** Czapa K et al. Ranitidine reduces aluminium toxicity in patients with renal failure. *Nephrol Dial Transpl* 1992; 7:1246-8.
- w619** Hadi S et al. Clinical investigation of ranitidine in patients with gastritis. *Clin Ther* 1989;11(5):590-4.
- w620** Farup PG et al. Ranitidine effectively relieves symptoms in a subset of patients with functional dyspepsia. *Scand J Gastroentero* 1997;32(8):755-9.
- w621** Wedorp IC et al. Treatment of reflux oesophagitis with ranitidine. *Gut* 1983;24(10):921-4.
- w622** Muller P et al. Ranitidine protects the human stomach and duodenal mucosa against low-dose acetylsalicylic acid. *Zeitschrift fur Gastroenterologie* 1989;27(12):722-4. [German]
- w623** Simon B et al. Clinical studies on acid inhibition by ranitidine under simultaneously administered pentagastrin. *Arzneimittel-Forsch* 1992;42(2):133-5. [German]

## References for trials listed in Webtables 1-7

- w624** Elizalde RO et al. Reflux esophagitis peptic ulcer duodenal and gastric treatment with ranitidine. Preliminary report of double-blind multi-institutional study. *Invest Med Int* 1983;10(1):3-6. [Spanish]
- w625** Metzneroth H et al. Prevention of ossification after total hip endoprosthesis with indomethacin and its effect on gastric mucosa. *Zeitschrift für Orthopädie und Ihre Grenzgebiete* 1991;129(2):178-82. [German]
- w626** Lopez-Mato A et al. Randomized, open label study on the use of ranitidine at different doses for the management of weight gain associated with olanzapine administration. *Vertex: Revista Argentina de Psiquiatria* 2003;14(52):85-96. [Spanish]
- w627** Zonneveld IM et al. Ranitidine does not affect psoriasis: A multicenter, double-blind, placebo-controlled study. *J Am Acad Dermatol* 1997;36(6):932-4.
- w628** Grove O et al. Ranitidine and high-dose antacid in reflux oesophagitis. A randomized, placebo-controlled trial. *Scand J Gastroenterol* 1985;20(4):457-61.
- w629** Corinaldesi R et al. Patients with duodenitis have gastric secretory and motor functions like those of duodenal ulcer patients: Results of a short-term treatment with ranitidine. *J Clin Gastroenterol* 1991;13(3):296-302.
- w630** Hine KR et al. Ranitidine in reflux oesophagitis. A double-blind placebo-controlled study. *Digestion* 1984;29(2):119-23.
- w631** Ideo G et al. Nadolol can prevent the first gastrointestinal bleeding in cirrhotics: a prospective, randomized study. *Hepatology* 1988;8(1):6-9.
- w632** Farup PG et al. Long-term treatment with 300 mg ranitidine once daily after dilatation of peptic oesophageal strictures. *Scand J Gastroenterol* 1992;27(7):594-8.
- w633** Lehtola J et al. Ranitidine, 150mg three times a day, in the treatment of reflux oesophagitis. A placebo-controlled, double-blind study. *Scand J Gastroenterol* 1986;21(2):175-80.
- w634** Wilder-Smith CH et al. Tolerance to oral H2-receptor antagonists. *Digest Dis Sci* 1990;35(8):976-83.
- w635** Ten Wolde S et al. High-dose ranitidine for the prevention of recurrent peptic ulcer disease in rheumatoid arthritis patients taking NSAIDs. *Aliment Pharm Therap* 1996;10(3):347-51.
- w636** King J et al. A randomised placebo control double-blind trial of ranitidine in patients with colorectal hepatic metastases: Survival advantage in patients with poor cell mediated immunity. *Gastrointest Oncol* 2002;4(1):39-44.
- w637** Veien NK et al. Ranitidine treatment of hand eczema in patients with atopic dermatitis: A double-blind, placebo-controlled trial. *J Am Acad Dermatol* 1995;32(6):1056-7.
- w638** Euler AR et al. Ranitidine is effective therapy for erosive esophagitis. *Am J Gastroenterol* 1993;88(4):520-4.
- w639** Cetin L et al. High-dose ranitidine is ineffective in the treatment of psoriasis. *Brit J Dermatol* 1997;137(6):1021-2.
- w640** Jurlander J et al. Improved vaccination response during ranitidine treatment, and increased plasma histamine concentrations, in patients with B cell chronic lymphocytic leukemia. *Leukemia* 1995;9(11):1902-9.
- w641** Nielson HJ et al. Ranitidine improves certain cellular immune responses in asymptomatic HIV-infected individuals. *J Acq Immun Def Synd* 1991;4(6):577-84.
- w642** Nielsen HJ et al. The effect of ranitidine on cellular immunity in patients with multiple myeloma. *Cancer Immunol Immun* 1990;32(3):201-5.
- w643** Roufail W et al. Ranitidine for erosive oesophagitis: a double-blind, placebo-controlled study. *Glaxo Erosive Esophagitis Study Group. Aliment Pharm Therap* 1992;6(5):597-607.
- w644** Silver MT et al. Ranitidine 300mg twice daily and 150mg four-times daily are effective in healing erosive oesophagitis. *Aliment Pharm Therap* 1996;10(3):373-80.
- w645** Bartlett JA et al. A placebo-controlled trial of ranitidine in patients with early human immunodeficiency virus infection. *J Infect Dis* 1998;177(1):231-4.
- w646** Vendelbo Johansen L et al. Infectious mononucleosis treated by an antihistamine: a comparison of the efficacy of ranitidine (Zantac) vs placebo in the treatment of infectious mononucleosis. *Clin Orthop Relat R* 1997;22(2):123-5.
- w647** Tefera S et al. Bismuth-based combination therapy for Helicobacter pylori-associated peptic ulcer disease (metronidazole for eradication, ranitidine for pain). *Am J Gastroenterol* 1996;91(5):935-41.
- w648** Ranjbar F et al. The effect of ranitidine on olanzapine-induced weight gain. *Biomed Res Int* 2013;2013:639391.
- w649** Chen ZQ. Influence of Ranitidine on gastrointestinal hemorrhage and thrombosis caused by dual antiplatelet therapy after PCI in patients with coronary heart disease. *Cardiology*. 2010;117:48-9.
- w650** Simon B et al. 75 mg roxatidine nocte protects human gastric mucosa against 300 mg acetylsalicylic acid nocte. *Z Gastroenterol* 1991;29(11):599-601. [German]
- w651** The European Cooperative Roxatidine Study Group. Roxatidine acetate as maintenance treatment for patients with peptic ulcer disease. *Verdauungskrankheiten* 1991;9(6):231-8. [German]
- w652** Dammann HG et al. The comparison of extemporaneous preparations of omeprazole, pantoprazole oral suspension and intravenous pantoprazole on the gastric pH of critically ill-patients. *Arzneimittel Forsch* 1995; 45(8):880-882.[German]
- w653** Muller P et al. Comparison of the protective effects of roxatidine and misoprostol on diclofenac gastroduodenal pathology. An endoscopic, controlled study of volunteers. *Arzneimittel Forsch* 1994;44(10):1127-9. [German]
- w654** Lassman H.B et al. 1988 The pharmacodynamics and pharmacokinetics of multiple doses of the new H2-receptor antagonist, roxatidine acetate, in healthy men. *Drugs* 35(Suppl. 3):53-64.
- w655** Braverman AJ et al. Dose validation and study design criteria in current cimetidine studies. *Clin Ther* 1986;8(Suppl):49-56.
- w656** Young MD et al. Determining the optimal dosage regimen for H2-receptor antagonist therapy-a dose validation approach. *Aliment Pharm Therap* 1989;3(1):47-57.
- w657** Domschke W et al. Kinetics of duodenal ulcer healing: effect of treatment with cimetidine. *Acta Hep-Gastroenterol* 1976;23(6):441-3.
- w658** Frank WO et al. Once-daily bedtime dosing regimen of cimetidine in the treatment of gastric ulcer. *Clin Ther* 1989;11(5):595-603.
- w659** Bodemar G et al. Cimetidine in the treatment of active duodenal and prepyloric ulcers. *Lancet* 1976;2(7978):161-4.
- w660** Frank WO et al. Acute treatment of benign gastric ulcer with once-daily bedtime dosing of cimetidine compared with placebo. *Aliment Pharm Therap* 1989;3(6):573-84.
- w661** Mosci AS et al. Relationship between Sakita endoscopic stage and duration of treatment for duodenal ulcer healing. *Braz J Med Biol Res* 1989;22(10):1219-23.
- w662** Tay HH et al. Twice daily cimetidine in the initial treatment of chronic gastric ulcer-a double-blind placebo-controlled trial. *Med J Malaysia* 1988;43(2):181-5.
- w663** Moshal MG et al. Treatment of duodenal ulcers with cimetidine. *S Afr Med J* 1977;19:760-3.
- w664** Hoffenberg P et al. Comparative treatment of gastric ulcer with pirenzepin, cimetidine and placebo. *Revista Medica de Chile* 1985;113(6):537-40. [Spanish]
- w665** Isenberg J et al. Double-blind comparisons of cimetidine and low-dose antacid versus placebo in the healing of benign gastric ulcer. *Gastroenterology* 1982;82(5 II):1090.
- w666** Hentschel E et al. Therapy of duodenal and prepyloric ulcers with cimetidine (author's transl). *Wien Klin Wochenschr* 1979;91(2):53-7. [German]
- w667** Garbol J et al. A controlled trial of cimetidine (Tagamet) in the treatment of stomach ulcer. *Ugeskrift for Laeger* 1979;141(48):3301-3. [Danish]
- w668** Tarnok F et al. Comparative study of the effects of placebo, atropine, cimetidine and carbenoxolone on patients with duodenal ulcer. *Orvosi Hetilap* 1980;121(26):1567-70. [Hungarian]
- w669** Peter P et al. Cimetidine in the treatment of duodenal ulcer (author's transl). *Deut Med Wschr* 1978;103(29):1163-6. [German]
- w670** Fica V et al. Comparative study of the efficacy of ranitidine, cimetidine (Asiloc), De-Nol and spirulina in the treatment of gastric and duodenal ulcer. *Rev Med Int, Neuro, Psi, Neuro, Derm-Ven* 1987;Medicina(1):21-35. [Romanian]
- w671** Bongiorno A et al. Cimetidine, pirenzepine, trithiozine in duodenal ulcer: Blind study versus placebo. *Curr Ther Res Clin E* 1983;34(4 II):718-27.
- w672** Marini U et al. A double blind trial of cimetidine and fentonium bromide, alone or combined, in the healing of duodenal ulceration. *Curr Ther Res Clin E* 1980;27(2):239-46.
- w673** Mazure PA et al. Cimetidine in active duodenal ulcer. *Curr Ther Res Clin E* 1980;27(4):601-7.
- w674** Lam SK et al. Accurate prediction of duodenal ulcer healing rate by discriminant analysis. *Gastroenterology* 1983;85(2):403-12.
- w675** Dobrilla G et al. Pirenzepine and cimetidine in the short-term treatment of duodenal ulcer: A vs-placebo endoscopic controlled trial. *Curr Ther Res Clin E* 1980;28(3 I):371-6.
- w676** Danielsson A et al. The relationship between active peptic ulcer, endoscopic duodenitis and symptomatic state after treatment with cimetidine. *Ann Clin Res* 1980;12(1):5-12.
- w677** Strom M et al. Antacid/anticholinergic, cimetidine, and placebo in treatment of active peptic ulcers. *Scand J Gastroenterol* 1981;16(5):593-602.
- w678** Corinaldesi R et al. Evaluation of basal and pentagastrin stimulated gastric secretion after treatment withdrawal opposite to a placebo therapy. *Policlinico - Sezione Medica* 1980;87(3):246-50. [Italian]
- w679** Johannessen T et al. 1- and 4-week cimetidine treatment for duodenal ulcer. *Scand J Gastroenterol* 1986;21(6):701-4.
- w680** Frost F et al. Cimetidine in patients with gastric ulcer: a multicentre controlled trial. *Brit Med J* 1977;2(6090):795-7.
- w681** Giger M et al. Therapy of duodenal ulcer with cimetidine, pirenzepine and placebo: report on a double-blind randomized study. *Schweiz Med Wschr* 1979;16:617-8. [German]
- w682** Ciclitira PJ et al. Double-blind controlled trial of cimetidine in the healing of gastric ulcer. *Gut* 1977;20(8):730-4.
- w683** Bianchi Porro G et al. Pirenzepine versus cimetidine in duodenal ulcer. A double-blind, placebo-controlled, short-term clinical trial. *Digestion* 1982;23(2):110-5.
- w684** Buligescu L et al. The value of cimetidine in the treatment of gastroduodenal ulcer. *Medecine Interne* 1985;23(1):51-5.
- w685** Gotthard R et al. Treatment of active prepyloric and duodenal ulcers with antacid/anticholinergic, cimetidine and placebo. *Scand J Gastroenterol* 1982;75(Suppl.):86-96.
- w686** Gray GR et al. Oral cimetidine in severe duodenal ulceration. A double-blind controlled trial. *Lancet* 1977;1(8001):4-7.
- w687** Grewal GS et al. Cimetidine in treatment of duodenal ulcer: results of a short term double blind study. *J Assoc Physicians India* 1979;27(9):785-9.
- w688** Marini G et al. Endoscopic evaluation of sulglycotide on healing duodenal ulcer. A controlled double-blind trial with two dosage levels. *Clin Trials J* 1981;18(2):105-13.
- w689** Gotlieb-Jensen K et al. Occurrence of Candida in gastric ulcers. Significance for the healing process. *Gastroenterology* 1983;85(3):535-7.
- w690** Kennedy T et al. Cimetidine for recurrent ulcer after vagotomy or gastroctomy: a randomised controlled trial. *Brit Med J* 1978;1(6122):1242-3.

## References for trials listed in Webtables 1-7

- w691** Giacosa A et al. Comparison between ranitidine, cimetidine, pirenzepine and placebo in the short term treatment of duodenal ulcer. *Scand J Gastroentero* 1982;72(Suppl.):215-9.
- w692** Monnis M et al. Effects of sucralfate on gastric acid secretion and duodenal ulcer healing. *J Assoc Phys India* 1988;36(4):251-3.
- w693** Mukhtar ED et al. Double-blind comparative study of cimetidine 1gm daily and placebo in the treatment of patients with severe duodenal ulceration in the Sudan. *E Afr Med J* 1982;59(6):413-5.
- w694** Guha Mazumdar DN et al. H-2 receptor antagonist (cimetidine) in the treatment of chronic duodenal ulcer and its effect on gastric secretions. *J Assoc Phys India* 1981;29(12):999-1006.
- w695** Manousos ON et al. A double-blind study of cimetidine in patients with duodenal or gastric ulcer in Greece. *J Int Med Res* 1978;6(5):381-3.
- w696** Falaiye JM et al. A double-blind comparative study of cimetidine and placebo in adult Nigerian duodenal ulcer patients with special reference to gastroduodenal mucosal morphology and intestinal bacterial activity. *Afr J Med Medi Sci* 1979;8(1-2):61-70.
- w697** Vantini I et al. Serum fasting gastrin levels after short-term treatment with cimetidine in patients with duodenal ulcer. *Acta Hepato-Gastro* 1978;25(5):376-9.
- w698** Tytgat GN et al. Controlled trial comparing colloidal bismuth subcitrate tablets, cimetidine and placebo in the treatment of gastric ulceration. *Scand J Gastroentero* 1982;80(Suppl.):31-8.
- w699** Chen PC et al. Double-blind therapeutic trial of active duodenal ulcer disease with 'cimetidine'. *J Formos Med Assoc* 1979;78(9):777-83. [Chinese].
- w700** Zespolowa P et al. Multicentre controlled clinical trial of gastric and duodenal ulcer healing with cimetidine. *Polski Tygodnik Lekarski* 1980;35(2):61-4. [Polish]
- w701** Villalobos JJ et al. Cimetidine in the treatment of duodenal ulcer: double-blind study. *J Int Med Res* 1978;6(4):351-4.
- w702** Bardhan KD et al. Comparison of two doses of cimetidine and placebo in the treatment of duodenal ulcer: a multicentre trial. *Gut* 1979;20(1):68-74.
- w703** Patty I et al. Cimetidine and placebo-cimetidine in the treatment of patients with chronic gastric ulcer (a multiclinical randomized double-blind comparative study). *Acta Medica Hungarica* 1988;45(1):83-95. [Hungarian]
- w704** Chen PH et al. A double blind study on short-term cimetidine in the treatment of duodenal ulcer. *Taiwan i Hsueh Hui Tsa Chih - Journal of the Formosan Medical Association* 1980;79(12):1149-54.
- w705** Jensen KG et al. Cimetidine (Tagamet) in the treatment of duodenal ulcer. A controlled trial. *Ugeskrift for Laeger* 1979;141(48):3298-300. [Danish]
- w706** Gudmand-Hoyer E et al. A pragmatic trial of cimetidine in duodenal ulcer patients. *Scand J Gastroentero* 1977;12(5):611-3.
- w707** Villalobos MM et al. Ulcera gastrica: estudio doble ciego comparativo con cimetidina-placebo. *Gen* 1979;33(1):33-7. [Spanish]
- w708** Alcalá-Santaella R et al. Controlled study of the treatment of a gastroduodenal ulcer with cimetidine. *Revista Espanola de las Enfermedades del Aparato Digestivo* 1980;58(2):155-68. [Spanish]
- w709** Guelrud M et al. Efectos de los bloqueadores H2 (Cimetidina) en el tratamiento de la ulcera duodenal: estudio doble ciego multicentrico. *Gen* 1978; 32(4):451-9. [Spanish]
- w710** Matos-Villalobos M et al. Ulcera Duodenal: Tratamiento doble ciego con cimetidina-placebo. *Gen* 1979;33(1):39-42.
- w711** Gugler R et al. Cimetidine for anastomotic ulcers after partial gastrectomy. A randomized controlled trial. *N Engl J Med* 1979;301(20):1077-80.
- w712** Festen HP et al. Cimetidine in anastomotic ulceration after partial gastrectomy. *Gastroenterology* 1979;77(1):83-5.
- w713** O'Laughlin JC et al. Resistance to medical therapy of gastric ulcers in rheumatic disease patients taking aspirin. A double-blind study with cimetidine and follow-up. *Digest Dis Sci* 1982;27(11):976-80.
- w714** Graham DY et al. Healing of benign gastric ulcer: comparison of cimetidine and placebo in the United States. *Ann Intern Med* 1985;102(5):573-6.
- w715** Akdamar K et al. Cimetidine versus placebo in the treatment of benign gastric ulcer. *Gastroenterology* 1981;80(5 II):1098.
- w716** Binder HJ et al. Cimetidine in the treatment of duodenal ulcer: a multicenter double blind study. *Gastroenterology* 1978;74(2)(Pt 2):t-8.
- w717** Barbezat GO et al. Effect of prolonged cimetidine therapy on gastric acid secretion in man. *Gut* 1978;19(2):151-4.
- w718** Bank S et al. Histamine H2-receptor antagonists in the treatment of duodenal ulcers. *S Afr Med J* 1976;50:1781-5.
- w719** Dolle W et al. The effect of cimetidine on in-patients with duodenal ulcer - a double blind trial. *Acta Gastro-ent Belg* 1978;41(7-8):424-6.
- w720** Collen MJ et al. Cimetidine vs placebo in duodenal ulcer therapy. Six-week controlled double-blind investigation without any antacid therapy. *Digest Dis Sci* 1980;25(10):744-9.
- w721** Clarke AC et al. Effects of cimetidine on the healing of benign gastric ulcers. *Aust NZ J Med* 1980;10(4):430-2.
- w722** Van Deventer GM et al. Sucralfate and cimetidine as single agents and in combination for treatment of active duodenal ulcers. A double-blind, placebo-controlled trial. *Am J Med* 1985;79(2 C):39-44.
- w723** Khanna SS et al. Sucralfate in the short-term treatment of duodenal ulcer. A double-blind comparison with cimetidine and placebo. *J Assoc Phys India* 1989;37(8):503-5.
- w724** Collen M et al. Cimetidine vs. placebo in prepyloric gastric ulcer therapy. Six week controlled double blind investigation without any antacid therapy. *Acta Gastroent Latinoameri* 1980;10(3):199-202.
- w725** Englert E Jr et al. Cimetidine, antacid, and hospitalization in the treatment of benign gastric ulcer: a multicenter double blind study. *Gastroenterology* 1978;74(2:Pt 2):416-25.
- w726** Dyck WP et al. Cimetidine and placebo in the treatment of benign gastric ulcer: a multicenter double blind study. *Gastroenterology* 1978;74(2:Pt 2):410-5.
- w727** Lojudice TA et al. Cimetidine in the treatment of gastric ulcer induced by steroidal and nonsteroidal anti-inflammatory agents. *Am J Gastroenterol* 1981;75(2):104-10.
- w728** Gaon D et al. Effect of cimetidine on lactase activity in patients with duodenal ulcer. *Acta Gastroenterologica Latinoamericana* 1981;11(2):285-90. [Spanish]
- w729** Isenberg JI et al. Healing of benign gastric ulcer with low-dose antacid or cimetidine. A double-blind, randomized, placebo-controlled trial. *N Engl J Med* 1983;308:1319-24.
- w730** Landecker KD et al. Cimetidine and gastric ulcer healing: a double-blind controlled trial. *Med J Australia* 1979;2(1):43-5.
- w731** Sewing KF et al. In-patient treatment of peptic ulcer with cimetidine. II. Controlled double-blind trial on gastric ulcer patients (author's transl). *Deutsche Medizinische Wochenschrift* 1978;103(4):152-4. [German]
- w732** Davies J et al. The influence of cimetidine on peptic ulcer in patients with arthritis taking anti-inflammatory drugs. *Brit J Rheumatol* 1986;25(1):54-8.
- w733** Blackwood WS et al. Cimetidine in duodenal ulcer. Controlled trial. *Lancet* 1976;2(7978):174-6.
- w734** Machado L et al. Randomized double-blind evaluation of the treatment of gastric ulcer with cimetidine vs placebo. *GEN* 1978;32(4):461-6. [Spanish]
- w735** Simon B et al. Famotidine once-a-day in the therapy of acute, benign gastric ulcer: A worldwide experience. *J Clin Gastroenterol* 1987;9(Suppl.2):19-22.
- w736** Dammann HG et al. Famotidine: Nocturnal administration for gastric ulcer healing. Results of multicenter trials in Austria and Germany. *Digestion* 1985;32(Suppl.1):45-50.
- w737** McCullough AJ et al. Suppression of nocturnal acid secretion with famotidine accelerates gastric ulcer healing. *Gastroenterology* 1989;97(4):860-6.
- w738** Dammann HG et al. Famotidine: proven once-a-day treatment for gastric ulcer. *Scand J Gastroentero* 1987;134(Suppl.):29-33.
- w739** Gitlin N et al. A multicenter, double-blind, randomized, placebo-controlled comparison of nocturnal and twice-a-day famotidine in the treatment of active duodenal ulcer disease. *Gastroenterology* 1987;92(1):48-53.
- w740** Dammann HG et al. Accelerated healing of benign gastric ulcers with a single evening dose of famotidine. *Schweizerische Medizinische Wochenschrift* 1985;115(14):484-8. [German]
- w741** Dyck WP et al. Treatment of duodenal ulceration in the United States. *Scand J Gastroentero* 1987;136(Suppl.):47-55.
- w742** Cloud ML et al. Healing and subsequent recurrence of duodenal ulcer in a clinical trial comparing nizatidine 300-mg and 100-mg evening doses and placebo in the treatment of active duodenal ulcer. *Curr Ther Res Clin E* 1989;45(3):359-67.
- w743** Cloud ML et al. Nizatidine versus placebo in active benign gastric ulcer disease: an eight-week, multicenter, randomized, double-blind comparison. The Nizatidine Benign Gastric Ulcer Disease Study Group. *Clin Pharmacol Ther* 1992;52(3):307-13.
- w744** Eliakim R et al. The effect of nizatidine on duodenal ulcer healing and on mucosal inflammatory mediators. *Israel J Med Sci* 1994;30(10):751-6.
- w745** Levendoglu H et al. Nizatidine: a new histamine receptor blocker in the treatment of active duodenal ulcers. *Am J Gastroenterol* 1986;81(12):1167-70.
- w746** Lam SK et al. Factors influencing healing of duodenal ulcer. Control of nocturnal secretion by H2 blockade and characteristics of patients who failed to heal. *Digest Dis Sci* 1985;30(1):45-51.
- w747** Forssell H et al. Gastroduodenal ulcer healing evaluated by repetitive endoscopic determination of ulcer size in patients on ranitidine or placebo. *Curr Ther Res Clin E* 1983;33(3 I):459-65.
- w748** Dobrilla G et al. Endoscopic double-blind controlled trial of ranitidine vs placebo in the short-term treatment of duodenal ulcer. *Hepato-gastroenterol* 1981;28(1):49-52.
- w749** Berstad A et al. Treatment of duodenal ulcer with ranitidine, a new histamine H2-receptor antagonist. *Scand J Gastroentero* 1980;15(5):637-9.
- w750** Darle N et al. Ranitidine in the treatment of gastric, prepyloric and duodenal ulcer: A controlled prospective double-blind trial. *Ann Clin Res* 1984;16(1):5-9.
- w751** Darle N et al. Ranitidine in the treatment of gastric, prepyloric and duodenal ulcer: A controlled prospective double-blind trial. *Annals of Clinical Research* 1984;16(1):5-9.
- w752** Pan GZ et al. Ranitidine in the treatment of duodenal ulcer. *Chinese J Int Med* 1987;26(1):30-1. [Chinese]
- w753** Martinez RO et al. Gastroduodenal lesions in rheumatoid arthritis. Evaluation and treatment. *Acta Gastro-ent Latin* 1988;18(2):87-96. [Spanish]
- w754** Schulz TB et al. Treatment of gastric ulcer with ranitidine. *Scand J Gastroentero* 1984;19(1):119-21.
- w755** Hirschowitz BI et al. Treatment of benign chronic gastric ulcer with ranitidine. A randomized, double-blind, and placebo-controlled six week trial. *J Clin Gastroenterol* 1986;8(3 II):371-6.
- w756** Marks IN et al. Ranitidine heals duodenal ulcers. *S Afr Med J* 1982;61(5):152-4.
- w757** Lee FI et al. Comparison of twice-daily ranitidine and placebo in the treatment of duodenal ulcer - A multicentre study in the United Kingdom. *Hepato-Gastroenterol* 1982;29(3):127-9.
- w758** Hirschowitz BI et al. A multicenter study of ranitidine treatment of duodenal ulcers in the United States. *J Clin Gastroenterol* 1986;8(3 II):359-66.

## References for trials listed in Webtables 1-7

- w759** Pan G et al. Ranitidine in acute duodenal ulcer. Double blind controlled trial. *Chinese Med J-Peking* 1988;101(4):277-9.
- w760** Hirschowitz BI et al. Lessons from the U.S. Multicenter trial of ranitidine treatment for duodenal ulcer. *J Clin Gastroenterol* 1983;5(Suppl.1):115-22.
- w761** Chatterji AN et al. A double-blind and randomised placebo-controlled study of ranitidine in duodenal ulcer patients. *Hepato-gastroenterol* 1980;27(Suppl.E36):299.
- w762** Ashton MG et al. Healing of gastric ulcers after one, two, and three months of ranitidine. *Brit Med J Clin Res Ed* 1982;284(6314):467-8.
- w763** Dobrilla G et al. Placebo controlled studies with ranitidine in duodenal ulcer. *Scand J Gastroenterol* 1981;69(Suppl.):101-7.
- w764** Gibinski K et al. The treatment of duodenal and gastric ulcer with ranitidine-a controlled, multicentre clinical trial. *Deut Z Verd Stoffwech* 1982;42(2-3):64-9. [German]
- w765** Nair KV et al. Randomised double blind placebo controlled clinical trial of sucralfate and ranitidine in chronic duodenal ulcer. *J Assoc Phys India* 1990;38(3):211-2.
- w766** Nelis GF et al. Controlled trial with ranitidine in the treatment of peptic ulcer. *Neth J Med* 1982;24(6):224-8.
- w767** Moshal MG et al. Ranitidine in uncomplicated duodenal ulceration. A double-blind endoscopically controlled trial. *S Afr Med J* 1981;10:393-4.
- w768** Murray WR et al. Duodenal Ulcer Healing After Presentation with Haemorrhage. *Gut* 1986;27(11):1387-9.
- w769** Pasquali R et al. Effect of prolonged administration of ranitidine on pituitary and thyroid hormones, and their response to specific hypothalamic-releasing factors. *Clin Endocrinol* 1981;15(5):457-62.
- w770** Johnson JA et al. Ranitidine 300mg at bedtime is effective for gastric ulcers: a 12-wk, multicenter, randomized, double-blind, placebo-controlled comparison. The Ranitidine 300mg HS Gastric Ulcer Study Group. *Am J Gastroenterol* 1993;88(7):1071-5.
- w771** Tildesley G et al. Ranitidine in the treatment of gastric and duodenal ulcers associated with non-steroidal anti-inflammatory drugs. *Brit J Rheumatol* 1993;32(6):474-8.
- w772** Korman MG et al. Ranitidine in duodenal ulcer: incidence of healing and effect of smoking. *Digest Dis Sci* 1982;27(8):712-5.
- w773** Makalino AU et al. Ranitidine in the treatment of peptic ulcer. *Clin Ther* 1984;6(2):185-92.
- w774** Leroux P et al. Effect of ranitidine on healing of peptic ulcer: a 2-month study. *Am J Gastroenterol* 1983;78(4):227-30.
- w775** Mach T et al. Effectiveness and tolerance of selected Polish antacids in the therapy of duodenal ulcer disease. A placebo- and ranitidine-controlled study. *Polski Tygodnik Lekarski* 1995;50(1-35):797-800. [Polish]
- w776** Mach T et al. A clinical trial on the effect of aluminum containing antacids on the course of duodenal ulcer healing and morphology of the gastric mucosa. *Folia Medica Cracoviensia* 1995;36(1-4):3-20. [Polish]
- w777** Yap I et al. Ranitidine in the acute treatment of duodenal ulcer-a double-blind placebo-controlled trial. *Singap Med J* 1985;26(7):539-42.
- w778** Roberts DM et al. Clinical trial of ranitidine in the treatment of peptic ulcer. *Brit J Clin Pract* 1982;36(1):9-12.
- w779** Mach T et al. Low-dose antacids versus ranitidine in the short-term treatment of patients with duodenal ulcer. Endoscopic and histologic placebo-controlled study. *Materia Medica Polona* 1992;24(3):201-4. [Polish]
- w780** Dupas JL et al. Acid suppression therapy is not required after one-week anti-Helicobacter pylori triple therapy for duodenal ulcer healing. *Gastroen Clin Biol* 2000;24(6-7):638-43. [French]
- w781** Mach T et al. Effect of selected antacids on morphometric parameters of the gastric mucosa of patients with active duodenal ulcer. *Przegląd Lekarski* 1991;48(10):642-5. [Polish]
- w782** Robins AH et al. Effect of the H2-receptor antagonist ranitidine on depression and anxiety in duodenal ulcer patients. *Postgrad Med J* 1984;60:353-5.
- w783** Sheers R et al. Ranitidine and duodenal ulceration: a short-term and maintenance study. *J Roy Soc Med* 1982;75(5):323-6.
- w784** Massarraf S et al. Efficacy of tetracycline and metronidazole alone or with ranitidine on the healing of duodenal ulcer and eradication of Helicobacter pylori. A randomized controlled multicenter study. Tetra-Metro-Ran Study Group. *Arzneimittel-Forschung* 1998;48(6):686-90. [German]
- w785** Lanza FL et al. Ranitidine bismuth citrate plus clarithromycin: a dual therapy regimen for patients with duodenal ulcer. *Helicobacter* 1998;3(3):212-21.
- w786** Trautman A et al. Ranitidine in the treatment of peptic ulcer disease. *Ann Roy Coll Physic* 1981;14(3):189.
- w787** Witzel L et al. Effect of ranitidine on ulcer healing. *Gastroenterology* 1981;80(5 II):1318.
- w788** Gilinsky NH et al. A multicenter, double-blind, randomized, placebo-controlled comparison of nocturnal roxatidine in the treatment of active duodenal ulcer disease. *Am J Gastroenterol* 1992;87(7):847-53.
- w789** Darle N et al. Treatment of acute massive gastroduodenal haemorrhage with cimetidine in elderly patients. *Ann Chir Gynaecol* 1984;73(2):64-8. [French]
- w790** Siddiqi SM et al. Cimetidine in acute upper gastrointestinal bleeding. *Brit Med J* 1979;1(6168):954-5.
- w791** Stiel D et al. Cimetidine reduces the risk of rebleeding from duodenal ulcers displaying signs of recent haemorrhage. *Scand J Gastroenterol* 1984;19(6):798-801.
- w792** Zuckerman G et al. Controlled trial of medical therapy for active upper gastrointestinal bleeding and prevention of rebleeding. *Am J Med* 1984;76(3):361-6.
- w793** Teres J et al. Cimetidine in acute gastric mucosal bleeding: results of a double-blind randomized trial. *Digest Dis Sci* 1980;25(2):92-6
- w794** Carstensen HE et al. Cimetidine for severe gastroduodenal hemorrhage: A randomized controlled trial. *Scand J Gastroenterol* 1980;15(1):103-5.
- w795** Hoare AM et al. Cimetidine in bleeding peptic ulcer. *Lancet* 1979;2(8144):671-3.
- w796** Teres J et al. Cimetidine in acute gastric mucosal bleeding: results of a double-blind randomized trial. *Digest Dis Sci* 1980;25(2):92-6.
- w797** Olivero S et al. Double blind evaluation of cimetidine efficacy in stopping bleeding from gastro duodenal peptic lesions. *Minerva Chirurgica* 1981;36(19):1243-52. [Italian]
- w798** Baltas B et al. Randomized prospective trial of cimetidine in the treatment of acute upper gastrointestinal haemorrhage. *Acta Chirurgica Hungarica* 1984;25(3):147-57.
- w799** Kang JY et al. Treatment of acute upper gastro-intestinal bleeding with cimetidine. *Scot Med J* 1977;22(4):297-8.
- w800** Stadler H et al. Conservative therapy of upper gastrointestinal hemorrhage (prospective, randomized, controlled. *Wiener Medizinische Wochenschrift* 1985 536;135(21):533-4. [German]
- w801** Barer D et al. Cimetidine and tranexamic acid in the treatment of acute upper-gastrointestinal-tract bleeding. *New Engl J Med* 1983;308(26):1571-5.
- w802** Galmiche JP et al. Treatment of bleeding due to peptic ulcer with cimetidine. A double blind trial (author's transl). *Gastroen Clin Biol* 1978;2(10):771-6. [French]
- w803** Birnie GG et al. A double-blind randomized trial of cimetidine in acute upper gastrointestinal bleeding. *Scand J Gastroenterol* 1984;19(7):885-8.
- w804** La Brooy SJ et al. Controlled trial of cimetidine in upper gastrointestinal haemorrhage. *Gut* 1979;20(10):892-5.
- w805** Fullarton GM et al. Controlled study of the effects of intravenous famotidine on intragastric pH in bleeding peptic ulcers. *Aliment Pharmacol Ther* 1991;5(1):77-84.
- w806** Walt RP et al. Continuous intravenous famotidine for haemorrhage from peptic ulcer. *Lancet* 1992;340(8827):1058-62.
- w807** Gray BN et al. Controlled clinical trial of ranitidine in bleeding peptic ulcer. *Aust NZ J Surg* 1986;56(9):723-7.
- w808** Ermolov AS et al. Stress-limiting effect of zantac in duodenal ulcer bleeding. *Vop Med Khim* 1995;41(5):56-9. [Russian]
- w809** Coraggio F et al. Somatostatin and ranitidine in the control of iatrogenic haemorrhage of the upper gastrointestinal tract. *BMJ* 1984;289(6439):224.
- w810** Basso N et al. Ranitidine and somatostatin. Their effects on bleeding from the upper gastrointestinal tract. *Arch Surg-Chicago* 1986;121(7):833-5.
- w811** Stave R et al. Prevention of recurrent ulcer bleeding, a multicentre study of the effect of ranitidine and trimipramine over one year. *Scand J Gastroenterol* 1986;124(Suppl.):55-62.
- w812** Dawson J et al. Ranitidine in acute upper gastrointestinal haemorrhage. *Brit Med J Clin Res Ed* 1982;285(6340):476-7.
- w813** Murakami K et al. Influence of anti-ulcer drugs used in Japan on the result of (13)C-urea breath test for the diagnosis of Helicobacter pylori infection. *J Gastroenterol* 2003;38(10):937-41.
- w814** Thong-Ngam D et al. Effect of omeprazole, rabeprazole, and rebamipide on the accuracy of urea breath test in patients with Helicobacter pylori infection *Asian Biomedicine*. 2010;4(2):337-42.
- w815** Kojima Y, Umegaki E, Yoda Y, Nouda S, Kuramoto T, Takeuchi T, et al. Prophylactic effect of rebamipide on gastric/small-intestinal mucosal damage induced by low-dose aspirin: A prospective randomized clinical trial. *Gastrointestinal Endosc* 2012;1(1):AB259.
- w816** Stupnicki T et al. Efficacy and tolerability of pantoprazole compared with misoprostol for the prevention of NSAID-related gastrointestinal lesions and symptoms in rheumatic patients. *Digestion* 2003;68(4):198-208.
- w817** Takayama M et al. A prospective randomized controlled study of a rebamipide monotherapy in the treatment of endoscopic submucosal dissection (ESD)-induced ulcers. *J Gastroenterol and Hepatol* 2012;27:419.
- w818** Matsui, S et al. Effect of rebamipide for endoscopic submucosal dissection (ESD)-induced ulcer in early gastric cancer: A randomized controlled trial. *Gastrointestinal Endoscopy* 2012 (1):AB237.
- w819** Nakamura M et al. Increased immunoreactivity and concentration of basic fibroblast growth factor in lansoprazole-treated gastric mucosa. *J Clin Gastroenterol* 1995;21(Suppl.):9.
- w820** Song KH et al. Healing effects of rebamipide and omeprazole in Helicobacter pylori-positive gastric ulcer patients after eradication therapy: a randomized double-blind, multinational, multi-institutional comparative study. *Digestion*. 2011;84(3):221-9.
- w821** Tunggal P et al. Effect of esomeprazole versus famotidine on platelet inhibition by clopidogrel: a double-blind, randomized trial. *Am Heart J* 2011;162(5):870-4.
- w822** Ng FH et al. Eesomeprazole compared with famotidine in the prevention of upper gastrointestinal bleeding in patients with acute coronary syndrome or myocardial infarction. *Am J Gastroenterol* 2012;107(3):389-96.
- w823** Norman Hansen AH et al. A randomised prospective study comparing the effectiveness of esomeprazole treatment strategies in clinical practice for 6 months in the management of patients with symptoms of gastroesophageal reflux disease. *Int J* 2005;59:665-71.
- w824** Hansen AN et al. Long-term management of patients with symptoms of gastro-oesophageal reflux disease - a Norwegian randomised prospective study comparing the effects of esomeprazole and ranitidine treatment strategies on health-related quality of life in a general practitioners setting. *Int J Clin Pract* 2006;60(1):15-22.

## References for trials listed in Webtables 1-7

- w825** Kilic ZM et al. Moxifloxacin plus amoxicillin and ranitidine bismuth citrate or esomeprazole triple therapies for *Helicobacter pylori* infection. *Digest Dis Sci* 2008;53(12):3133-7.
- w826** Nadeau P et al. Interaction between 2C19\*2 gene polymorphism and proton pump inhibitors on platelet reactivity in clopidogrel-treated patients. *Can J Cardiol* 2012;1:S153.
- w827** Miyake K et al. Preventive therapy for non-steroidal anti-inflammatory drug-induced ulcers in Japanese patients with rheumatoid arthritis: the current situation and a prospective controlled-study of the preventive effects of lansoprazole or famotidine. *Aliment Pharm Therap* 2005;21(Suppl.72):67-72.
- w828** Endo M et al. Long-term maintenance treatment of reflux esophagitis resistant to H2-RA with PPI (lansoprazole). *Nippon Rinsho - Jpn J Clin Med* 2000;58(9):1865-70. [Japanese]
- w829** Mine S et al. Ultrasonographic evaluation of lansoprazole-induced improvement of submucosal injury in patients with gastroesophageal reflux. *Am J Gastroenterol* 2000;95(2):381-6.
- w830** Kim N et al. Lafutidine versus lansoprazole in combination with clarithromycin and amoxicillin for one versus two weeks for *Helicobacter pylori* eradication in Korea. *Helicobacter*. 2008;13(6):542-9.
- w831** Petite JP et al. Lansoprazole versus ranitidine in the treatment of reflux esophagitis. Multicentric study. *Med Chir Digest* 1991;20(8):462-8. [French]
- w832** Bardhan KD et al. Lansoprazole is superior to ranitidine as maintenance treatment for the prevention of duodenal ulcer relapse. *Aliment Pharm Therap* 1999;13(6):827-32.
- w833** Meining A et al. Changes in *Helicobacter pylori*-induced gastritis in the antrum and corpus during and after 12 months of treatment with ranitidine and lansoprazole in patients with duodenal ulcer disease. *Aliment Pharm Therap* 1998;12(8):735-40.
- w834** Gough AL et al. Lansoprazole versus ranitidine in the maintenance treatment of reflux esophagitis. *Aliment Pharm Therap* 1996;10(4):529-39.
- w835** Peura DA et al. Lansoprazole for long-term maintenance therapy of erosive esophagitis: double-blind comparison with ranitidine. *Digest Dis Sci* 2009;54(5):955-63.
- w836** Spadaccini A et al. Triple regimens using lansoprazole or ranitidine bismuth citrate for *Helicobacter pylori* eradication. *Aliment Pharm Therap* 1998;12(10):997-1001.
- w837** Plein K et al. Efficacy of therapy with lansoprazole in patients with acute reflux esophagitis compared with ranitidine. *Leber Magen Darm* 1997;27(3):145-53. [German]
- w838** Robinson M et al. A comparison of lansoprazole and ranitidine in the treatment of erosive esophagitis. *Aliment Pharm Therap* 1995;9(1):25-31.
- w839** Bardhan KD et al. Lansoprazole versus ranitidine for the treatment of reflux esophagitis. *Aliment Pharm Therap* 1995;9(2):145-51.
- w840** Feldman M et al. Treatment of reflux esophagitis resistant to H2-receptor antagonists with lansoprazole, a new H<sup>+</sup>/K<sup>+</sup>-ATPase inhibitor: A controlled, double-blind study. *Am J Gastroenterol* 1993;88(8):1212-7.
- w841** Jansen JB et al. Standard-dose lansoprazole is more effective than high-dose ranitidine in achieving endoscopic healing and symptom relief in patients with moderately severe reflux esophagitis. The Dutch Lansoprazole Study Group. *Aliment Pharm Therap* 1999;13(12):1611-20.
- w842** Jones RH et al. Lansoprazole 30mg daily versus ranitidine 150mg b.d. In the treatment of acid-related dyspepsia in general practice. *Aliment Pharm Therap* 1997;11(3):541-6.
- w843** Howden CW et al. Management of heartburn in a large, randomized, community-based study: comparison of four therapeutic strategies. [Erratum appears in *Am J Gastroenterol* 2001;96(9):2809]. *Am J Gastroenterol* 2001;96(6):1704-10.
- w844** Sontag SJ et al. Lansoprazole heals erosive reflux esophagitis in patients with Barrett's esophagus. *Aliment Pharm Therap* 1997;11(1):147-56.
- w845** Sontag SJ et al. Lansoprazole heals erosive reflux esophagitis resistant to histamine H2-receptor antagonist therapy. *Am J Gastroenterol* 1997;92(3):429-37.
- w846** Swarbrick ET et al. Prevention of recurrence of oesophageal stricture, a comparison of lansoprazole and high-dose ranitidine. *Eur J Gastroen Hepat* 1996;8(5):431-8.
- w847** Treiber G et al. Age-dependent eradication of *Helicobacter pylori* with dual therapy. *Aliment Pharm Therap* 1997;11(4):711-8.
- w848** Shimizu Y et al. A proton pump inhibitor, lansoprazole, ameliorates asthma symptoms in asthmatic patients with gastro-oesophageal reflux disease. *Tohoku J Exp Med* 2006;209(3):181-9.
- w849** Bate CM et al. Omeprazole is more effective than cimetidine in the prevention of recurrence of GERD-associated heartburn and the occurrence of underlying esophagitis. *Aliment Pharm Therap* 1998;12(1):41-7.
- w850** Bate CM et al. Comparison of omeprazole and cimetidine in reflux esophagitis: symptomatic, endoscopic, and histological evaluations. *Gut* 1990;31(9):968-72.
- w851** Thorens J et al. Bacterial overgrowth during treatment with omeprazole compared with cimetidine: A prospective randomised double blind study. *Gut* 1996;39(1):54-9.
- w852** Dehn TCB et al. Double blind comparison of omeprazole (40 mg od) versus cimetidine (400 mg qd) in the treatment of symptomatic erosive reflux esophagitis, assessed endoscopically, histologically and by 24 h pH monitoring. *Gut* 1990;31(5):509-13.
- w853** Bate CM et al. Omeprazole is more effective than cimetidine for the relief of all grades of gastro-oesophageal reflux disease-associated heartburn, irrespective of the presence or absence of endoscopic esophagitis. *Aliment Pharm Therap* 1997;11(4):755-63.
- w854** Shimatani T et al. Which has superior acid-suppressive effect, 10mg omeprazole once daily or 20mg famotidine twice daily? Effects of single or repeated administration in Japanese *Helicobacter pylori*-negative CYP2C19 extensive metabolizers. *Digest Dis Sci* 2007;52(2):390-5.
- w855** Yano H et al. Influence of omeprazole and famotidine on the antiplatelet effects of clopidogrel in addition to aspirin in patients with acute coronary syndromes - A prospective, randomized, multicenter study. *Circ J* 2012;76(11):2673-80.
- w856** Sakurai K et al. Efficacy of omeprazole, famotidine, mosapride and teprenone in patients with upper gastrointestinal symptoms: an omeprazole-controlled randomized study (J-FOCUS). *BMC Gastroenterology*. 2012;12:42.
- w857** Fujiwara Y et al. Famotidine vs. omeprazole: A prospective randomized multicenter trial to determine efficacy in non-erosive gastro-oesophageal reflux disease. *Aliment Pharm Therap* 2005;21(Suppl.2):10-8.
- w858** Wada T et al. Efficacy of famotidine and omeprazole in healing symptoms of non-erosive gastro-oesophageal reflux disease: randomized-controlled study of gastro-oesophageal reflux disease. *Aliment Pharm Therap* 2005;21(Suppl.9(2)):2-9.
- w859** Hu FL et al. Comparison of H2-receptor antagonist and proton-pump inhibitor-based triple regimens for the eradication of *Helicobacter pylori* in Chinese patients with gastritis or peptic ulcer. *J Int Med Res* 2003;31(6):469-74.
- w860** Kawano S et al. Randomized comparative study of omeprazole and famotidine in reflux esophagitis. *J Gastroen Hepatol* 2002;17(9):955-9.
- w861** Miner PB, Jr. et al. Comparison of gastric pH with omeprazole magnesium 20.6mg (Prilosec OTC) o.m. famotidine 10mg (Pepcid AC) b.d. and famotidine 20mg b.d. over 14 days of treatment. *Aliment Pharm Therap* 2007;25(1):103-9.
- w862** Soga T et al. Is a proton pump inhibitor necessary for the treatment of lower-grade reflux esophagitis? *J Gastroenterol* 1999;34(4):435-40.
- w863** Guslandi M et al. Acid inhibitors and gastric blood flow. *Med Sci Res* 1994;22(3):211.
- w864** Kim EH et al. Efficacy of Lafutidine Versus Famotidine in Patients with Reflux Esophagitis: A Multi-Center, Randomized, Double-Blind, Non-inferiority Phase III Trial. *Dig Dis Sci*. 2015;60(6):1724-32.
- w865** Arbel Y et al. Platelet inhibitory effect of clopidogrel in patients treated with omeprazole, pantoprazole, or famotidine a prospective randomized crossover study. *J Am Coll Cardiol* 2012;1:E1410.
- w866** Marks RD et al. Omeprazole versus H2-receptor antagonists in treating patients with peptic stricture and esophagitis. *Gastroenterology* 1994;106(4):907-15.
- w867** Kim JW et al. Therapeutic effect of low-dose omeprazole vs. standard-dose ranitidine in mild to moderate reflux esophagitis. *Korean J Gastroenterol/Taehan Sohwagi Hakhoe Chi* 2004;43(3):153-9. [Korean]
- w868** Hallerback B et al. Omeprazole or ranitidine in long-term treatment of reflux esophagitis. The Scandinavian Clinics for United Research Group. *Gastroenterology* 1994;107(5):1305-11.
- w869** Karnes WE et al. Prolonged inhibition of acid secretion causes hypergastrinaemia without altering pH inhibition of gastrin release in humans. *Aliment Pharm Therap* 1990;4(5):443-56.
- w870** Bardhan KD et al. Symptomatic gastro-oesophageal reflux disease: double blind controlled study of intermittent treatment with omeprazole or ranitidine. The European Study Group. *Brit Med J* 1999;318(7182):502-7.
- w871** Jaspersen D et al. Omeprazole MUPS for reflux related chronic persistent cough. *Endoskopie Heute* 1999;12(2):12-4. [German]
- w872** Lauritsen K et al. Omeprazole and ranitidine in the prevention of relapse in patients with duodenal ulcer disease. *Can J Gastroenterol* 1999;13(10):806-13.
- w873** Venables TL et al. Omeprazole 10 milligrams once daily, omeprazole 20 milligrams once daily, or ranitidine 150 milligrams twice daily, evaluated as initial therapy for the relief of symptoms of gastro-oesophageal reflux disease in general practice. *Scand J Gastroenterol* 1997;32(10):965-73.
- w874** Yeomans ND et al. A comparison of omeprazole with ranitidine for ulcers associated with nonsteroidal anti-inflammatory drugs. *New Engl J Med* 1998;338(11):719-26.
- w875** Zeitoun P et al. Omeprazole (20 mg od) versus ranitidine (150 mg bd) in reflux esophagitis. *Gastroen Clin Biol* 1989;13:457-62. [French]
- w876** Kaplan-Machlis B et al. Effectiveness and costs of omeprazole vs ranitidine for treatment of symptomatic gastroesophageal reflux disease in primary care clinics in West Virginia. *Arch Fam Med* 2000;9(7):624-30.
- w877** De Rojas FD et al. Omeprazole and ranitidine in long-term treatment of duodenal ulcer: A double-blind comparison of length of time in remission. *Digest Dis Sci* 1998;43(9):1964-9.
- w878** Annibale B et al. Omeprazole in patients with mild or moderate reflux esophagitis induces lower relapse rates than ranitidine during maintenance treatment. *Hepato-Gastroenterol* 1998;45(21):742-51.
- w879** Maton PN et al. Efficacy of omeprazole versus ranitidine for symptomatic treatment of poorly responsive acid reflux disease - a prospective, controlled trial. *Aliment Pharm Therap* 1999;13(6):819-26.
- w880** Angelini G et al. Comparison between omeprazole and ranitidine in medium-term treatment of reflux esophagitis. *Giorn Ital End Dig* 1993;16(2):85-9. [Italian]
- w881** Hungin APS et al. A comparison of the efficacy of omeprazole 20 mg once daily with ranitidine 150 mg bd in the relief of symptomatic gastro-oesophageal reflux disease in general practice. *Brit J Clin Res* 1993;4:73-88.
- w882** Di Mario F et al. Different doses of omeprazole in the maintenance treatment of patients with peptic ulcers resistant to H2 blockers. *Curr Ther Res Clin E* 1994;55(11):1363-71.

## References for trials listed in Webtables 1-7

- w883** Armstrong D et al. Heartburn-dominant, uninvestigated dyspepsia: a comparison of 'PPI-start' and 'H2-RA-start' management strategies in primary care-the CADET-HR Study. *Aliment Pharm Therap* 2005;21(10):1189-202.
- w884** Bianchi Porro G et al. Short-term treatment of refractory reflux esophagitis with different doses of omeprazole or ranitidine. *J Clin Gastroenterol* 1992;15(3):192-8.
- w885** Frame MH et al. Omeprazole produces significantly greater healing of erosive or ulcerative reflux esophagitis than ranitidine: The Italian Reflux Study Group. *Eur J Gastroen Hepat* 1991;3(7):511-7.
- w886** Festen HP et al. Omeprazole versus high-dose ranitidine in mild gastroesophageal reflux disease: short- and long-term treatment. The Dutch Reflux Study Group. *Am J Gastroenterol* 1999;94(4):931-6.
- w887** Savarino V et al. Effect of gastric acid suppression on 13C-urea breath test: comparison of ranitidine with omeprazole. *Aliment Pharm Therap* 2000;14(3):291-7.
- w888** Smith PM et al. A comparison of omeprazole and ranitidine in the prevention of recurrence of benign esophageal stricture. Restore Investigator Group. *Gastroenterology* 1994;107(5):1312-8.
- w889** Zeitoun P et al. Omeprazole versus ranitidine in erosive oesophagitis. *Lancet* 1987;2(8559):621-2.
- w890** Tham TC et al. Randomised controlled trial of ranitidine versus omeprazole in combination with antibiotics for eradication of *Helicobacter pylori*. *Ulster Med J* 1996;65(2):131-6.
- w891** Richter JE et al. Omeprazole versus ranitidine or ranitidine/metoclopramide in poorly responsive symptomatic gastroesophageal reflux disease. *Am J Gastroenterol* 1996;91(9):1766-72.
- w892** Revicki DA et al. Health-related quality of life outcomes of omeprazole versus ranitidine in poorly responsive symptomatic gastroesophageal reflux disease. *Digest Dis Sci* 1998;16(5):284-91.
- w893** Dent J et al. Omeprazole v ranitidine for prevention of relapse in reflux oesophagitis. A controlled double blind trial of their efficacy and safety. *Gut* 1994;35(5):590-8.
- w894** Vigneri S et al. A comparison of five maintenance therapies for reflux esophagitis. *New Engl J Med* 1995;333(17):1106-10.
- w895** Sandmark S et al. Omeprazole or ranitidine in the treatment of reflux esophagitis. Results of a double-blind, randomized, Scandinavian multicenter study. *Scand J Gastroentero* 1988;23(5):625-32.
- w896** Figura N et al. Omeprazole versus ranitidine in the prevention of duodenal ulcer recurrence after eradication therapy. *Curr Ther Res Clin E* 1995;56(6):568-72.
- w897** Cavajuga S et al. Four different treatment protocols for *Helicobacter pylori* infection-a clinical pilot study. *Medicinski Arhiv* 2003;57(3):151-6. [Croatian].
- w898** Bianchi Porro G et al. High-dose famotidine in the maintenance treatment of refractory esophagitis: results of a "medium-term" open study. *Am J Gastroenterol* 1991;86(11):1585-7.
- w899** Ruth M et al. The effect of omeprazole or rantidine treatment on 24-hour esophageal acidity in patients with reflux esophagitis. *Scand J Gastroentero* 1988;23(9):1141-6.
- w900** Bate CM et al. Reflux oesophagitis resolves more rapidly with omeprazole 20mg once daily than with ranitidine 150mg twice daily: omeprazole 40mg once daily provides further benefit in unresponsive patients. *Brit J Clin Res* 1991;2:133-48.
- w901** Archambault AP et al. Comparison of omeprazole with ranitidine for treatment of symptoms associated with gastroesophageal reflux disease and uncomplicated duodenal ulcer. *Can J Gastroenterol* 1996;10(3):156-62.
- w902** Silvis SE et al. A randomized blinded comparison of omeprazole and ranitidine in the treatment of chronic esophageal stricture secondary to acid peptic esophagitis. *Gastrointest Endosc* 1996;43(3):216-21.
- w903** Green JRB et al. A comparison of the cost-effectiveness of omeprazole and ranitidine in reflux oesophagitis. *Brit J Med Eco* 1995;8(3):157-69.
- w904** Bergmann JF et al. Comparison of the cost-efficacy ratio of omeprazole and ranitidine in the treatment of reflux esophagitis. *Gastroen Clin Biol* 1995;19(5):482-6. [French]
- w905** Prewett EJ et al. Nocturnal intragastric acidity during and after a period of dosing with either ranitidine or omeprazole. *Gastroenterology* 1991;100(4):873-7.
- w906** Blum AL et al. Comparison of omeprazole and ranitidine in the treatment of reflux esophagitis. *New Engl J Med* 1986;314(11):716.
- w907** Havelund T et al. Omeprazole and ranitidine in treatment of reflux oesophagitis: double blind comparative trial. *Brit Med J Clin Res Ed* 1988;296(6615):89-92.
- w908** Jaspersen D et al. Omeprazole in the treatment of patients with complicated gastro-oesophageal reflux disease. *J Gastroen Hepatol* 1996;11(10):900-2.
- w909** Pellegrini M et al. Is a long-term ranitidine-based triple therapy against *Helicobacter pylori* only a heritage of the past? A prospective, randomized clinicopharmacological study. *Aliment Pharm Therap* 2005;22(4):343-8.
- w910** Vantrappen G et al. Omeprazole (40mg) is superior to ranitidine in short-term treatment of ulcerative reflux esophagitis. *Digest Dis Sci* 1988;33(5):523-9.
- w911** Hurlimann S et al. Comparison of acid inhibition by either oral high-dose ranitidine or omeprazole. *Aliment Pharm Therap* 1994;8(2):193-201.
- w912** Dammann HG et al. Differences in healing tendency of reflux oesophagitis with omeprazol and ranitidine. Results of an Austrian-German-Swiss multicenter trial. *Deut Med Wochenschr* 1986;111(4):123-8. [German]
- w913** Lundell L et al. Prevention of relapse of reflux oesophagitis after endoscopic healing: the efficacy and safety of omeprazole compared with ranitidine. *Digestion* 1991;47(Suppl.):5.
- w914** Klinkenberg-Knol EC et al. The effects of omeprazole and ranitidine on 24-hour pH in the distal oesophagus of patients with reflux oesophagitis. *Aliment Pharm Therap* 1988;2(3):221-7.
- w915** Klinkenberg-Knol EC et al. Double-blind multicentre comparison of omeprazole and ranitidine in the treatment of reflux oesophagitis. *Lancet* 1987;1(8529):349-51.
- w916** Ofman JJ et al. The economic impact of the diagnosis of dysplasia in Barrett's esophagus. *Am J Gastroenterol* 2000;95(10):2946-52.
- w917** Peters FTM et al. Endoscopic regression of Barrett's oesophagus during omeprazole treatment; a randomised double blind study. *Gut* 1999;45(4):489-94.
- w918** Peters FT et al. The influence of *Helicobacter pylori* on oesophageal acid exposure in GERD during acid suppressive therapy. *Aliment Pharm Therap* 1999;13(7):921-6.
- w919** Ahmad MM. Efficacy of *Helicobacter pylori* eradication therapies on the background of metronidazole resistance in Bangladesh. *J Gastroenterology Hepatol* 2012;27:22.
- w920** Nakamura K et al. Randomized controlled trial: roxatidine vs omeprazole for non-erosive reflux disease. *Hepato-gastroenterol* 2010;57(99-100):497-500.
- w921** Goh KL et al. Roxithromycin in the eradication of *Helicobacter pylori*. *Am J Gastroenterol* 1994;89(11):2099-100.
- w922** Ng F et al. Famotidine is inferior to pantoprazole in preventing recurrence of aspirin-related peptic ulcers or erosions. *Gastroenterology* 2010;138(1):82-8.
- w923** Maity S et al. Randomized controlled trial of effectiveness of lufutidine versus pantoprazole in uninvestigated dyspepsia. *Indian J Pharmacol*. 2014;46(5):498-502.
- w924** Kovacs TO et al. Comparison of the efficacy of pantoprazole vs. nizatidine in the treatment of erosive oesophagitis: a randomized, active-controlled, double-blind study. *Aliment Pharm Therap* 2002;16(12):2043-52.
- w925** Armstrong D et al. Symptom relief in gastroesophageal reflux disease: A randomized, controlled comparison of pantoprazole and nizatidine in a mixed patient population with erosive esophagitis or endoscopy-negative reflux disease. *Am J Gastroenterol* 2001;96(10):2849-57.
- w926** Pare P et al. Pantoprazole rapidly improves health-related quality of life in patients with heartburn: a prospective, randomized, double blind comparative study with nizatidine. *J Clin Gastroenterol* 2003;37(2):132-8.
- w927** Metz DC et al. Pantoprazole maintenance therapy prevents relapse of erosive oesophagitis. *Aliment Pharm Therap* 2003;17(1):155-64.
- w928** Richter JE et al. Prevention of erosive oesophagitis relapse with pantoprazole. *Aliment Pharm Therap* 2004;20(5):567-75.
- w929** Talley NJ et al. Randomised controlled trial of pantoprazole versus ranitidine for the treatment of uninvestigated heartburn in primary care. *Med J Australia* 2002;177(8):423-7.
- w930** Van ZJ et al. Efficacy and safety of pantoprazole versus ranitidine in the treatment of patients with symptomatic gastroesophageal reflux disease. *Digestion* 2004;70(1):61-9.
- w931** Ramirez-Barba EJ et al. Low-dose pantoprazole (20 mg) is effective for treatment of mild reflux oesophagitis. *Clin Drug Invest* 1999;18(6):445-51.
- w932** Adamek RJ et al. Relapse prevention in reflux oesophagitis with regard to *Helicobacter pylori* status: a double-blind, randomized, multicentre trial to compare the efficacy of pantoprazole versus ranitidine. *Eur J Gastroent Hepat* 2001;13(7):811-7.
- w933** Dettmer A et al. Pantoprazole 20mg is effective for relief of symptoms and healing of lesions in mild reflux oesophagitis. *Aliment Pharm Therap* 1998;12(9):865-72.
- w934** Kaspari S et al. Comparison of pantoprazole 20mg to ranitidine 150mg b.i.d. in the treatment of mild gastroesophageal reflux disease. *Digestion* 2001;63(3):163-70.
- w935** Van Zyl JH et al. Efficacy and tolerability of 20mg pantoprazole versus 300mg ranitidine in patients with mild reflux-oesophagitis: a randomized, double-blind, parallel, and multicentre study. *Eur J Gastroen Hepat* 2000;12(2):197-202.
- w936** Dulbecco P et al. Impact of long-term ranitidine and pantoprazole on accuracy of 13C-urea breath test. *Digest Dis Sci* 2003;48(2):315-21.
- w937** Duvnjak M et al. Efficacy of pantoprazole compared with ranitidine in the treatment of gastroesophageal reflux disease: An open-labeled randomized parallel and longitudinal comparative trial. *Pharmaca* 2002;40(3-4):199-206.
- w938** Awad RA et al. Pantoprazole effectively controls intra-oesophageal pH and promotes oesophageal healing: further evidence for ranitidine-induced tolerance in patients with gastro-oesophageal reflux disease. *Clin Drug Invest* 2001;21(4):265-72.
- w939** Teyssen S et al. Reliable acid suppression with pantoprazole contrasts with rapid development of tolerance to ranitidine in healthy individuals. *Clin Drug Invest* 2001;21(4):273-9.
- w940** Koop H et al. Comparative trial of pantoprazole and ranitidine in the treatment of reflux esophagitis: Results of a German multicenter study. *J Clin Gastroenterol* 1995;20(3):192-5.
- w941** Meneghelli UG et al. Efficacy and tolerability of pantoprazole versus ranitidine in the treatment of reflux esophagitis and the influence of *Helicobacter pylori* infection on healing rate. *Dis Esophagus* 2002;15(1):50-6.
- w942** Armbrecht U et al. Treatment of reflux oesophagitis of moderate and severe grade with ranitidine or pantoprazole-comparison of 24-hour intragastric and oesophageal pH. *Aliment Pharm Therap* 1997;11(5):959-65.
- w943** Gallo S et al. Clinical superiority of pantoprazole over ranitidine in the treatment of reflux esophagitis grade II and III. A prospective, double-blind, double-placebo study. Mexican clinical experience. *Mexican Pantoprazole Study Group. Rev Gastroenterol Mex* 1998;63(1):11. [Spanish].
- w944** Parri MS et al. Pantoprazole significantly interferes with antiplatelet effect of clopidogrel: results of a pilot randomized trial. *Int J Card* 2013;167(5):2177-81.



## References for trials listed in Webtables 1-7

- w945** Demir M et al. Efficacy of two different Helicobacter pylori eradication regimens in patients with type 2 diabetes and the effect of Helicobacter pylori eradication on dyspeptic symptoms in patients with diabetes: a randomized controlled study. *Am J Med Sci* 2009;338(6):459-64.
- w946** Chan FKL et al. Proton-pump inhibitor (PPI) versus histamine-2 receptor antagonist (H2RA) for the prevention of recurrent upper gastrointestinal bleeding (UGI) in high-risk users of low-dose aspirin (ASA): An interim analysis. *Gastroenterology* 2014;1(1):S-208.
- w947** Park Y et al. Effect of rabeprazole versus famotidine on the pharmacodynamics of clopidogrel. *EuroIntervention* 2013;9:18.
- w948** Dewan B et al. Lafutidine 10 mg versus rabeprazole 20 mg in the treatment of patients with heartburn-dominant uninvestigated dyspepsia: A randomized, multicenter trial. *Gastroenterol Res Pract* 2011;640685.
- w949** Jee SR et al. A randomized, comparative study of rabeprazole vs. ranitidine maintenance therapies for reflux esophagitis-multicenter study. *Korean J Gastroenterol/Taehan Sohwagi Hakhoe Chi* 2005;45(5):321-7. [Korean]
- w950** Jeong HY et al. A randomized, prospective, comparative, multicenter study of rabeprazole and ranitidine in the treatment of reflux esophagitis. *Korean J Gastroenterol/Taehan Sohwagi Hakhoe Chi* 2006;47(1):15-21. [Korean]
- w951** Farley A et al. Rabeprazole versus ranitidine for the treatment of erosive gastroesophageal reflux disease: a double-blind, randomized clinical trial. *Rabeprazole Study Group. Am J Gastroenterol* 2000;95(8):1894-9.
- w952** Dai RZ et al. Clinical effects of mosapride plus ranitidine vs mosapride plus rabeprazole for treatment of esophageal reflux laryngitis. *World Chinese Journal of Digestology* 2015;23(6):954-8. [Chinese]
- w953** Goldstein JL et al. Healing of gastric ulcers with esomeprazole versus ranitidine in patients who continued to receive NSAID therapy: a randomized trial. *Am J Gastroenterol* 2005;100:2650-7.
- w954** Goldstein JL et al. Clinical trial: healing of NSAID-associated gastric ulcers in patients continuing NSAID therapy - a randomized study comparing ranitidine with esomeprazole. *Aliment Pharm Therap* 2007;26(8):1101-11.
- w955** Aoyama N et al. Evaluation of gastric ulcer healing by lansoprazole by measurement of ulcer diameter. *J Clin Gastroenterol* 1995;20(Suppl. 2):86-9.
- w956** Tsuji S et al. Gastric ulcer healing and basic fibroblast growth factor: effects of lansoprazole and famotidine. *J Clin Gastroenterol* 1995;20(Suppl.):1-4.
- w957** Sakaguchi M et al. Suppressive action of lansoprazole on gastric acidity and its clinical effect in patients with gastric ulcers: Comparison with famotidine. *J Clin Gastroenterol* 1995;20(Suppl. 2):27-31.
- w958** Okai T et al. Comparison of lansoprazole and famotidine for gastric ulcer by endoscopic ultrasonography: A preliminary trial. *J Clin Gastroenterol* 1995;20(Suppl. 2):32-5.
- w959** Hotz J et al. Lansoprazole versus famotidine: efficacy and tolerance in the acute management of duodenal ulceration. *Aliment Pharmacol Ther* 1992;6(1):87-95.
- w960** Nema H et al. Comparative study of therapeutic effects of PPI and H2RA on ulcers during continuous aspirin therapy. *World J Gastroenterol*. 2010;16(42):5342-6.
- w961** Nema H et al. Effects of antacids on gastroduodenal mucosal injuries caused by low-dose aspirin. *Ther Res* 2008;29(11):1941-5. [Japanese]
- w962** Londong W et al. Dose-related healing of duodenal ulcer with the proton pump inhibitor lansoprazole. *Aliment Pharm Therap* 1991;5:245-54.
- w963** Licht H et al. Lansoprazole versus ranitidine in the treatment of duodenal ulcers: Results of a multicentric randomized double-blind study in similar groups. *Med Chir Digest* 1990;19(4):251-5. [French]
- w964** Agrawal NM et al. Superiority of lansoprazole vs ranitidine in healing nonsteroidal anti-inflammatory drug-associated gastric ulcers: Results of a double-blind, randomized, multicenter study. *Arch Intern Med* 2000;160(10):1455-61.
- w965** Goldstein JL et al. PPI based healing of NSAID associated ulcers in patients continuing NSAIDs. *Am J Gastroenterol* 2000;95(9):142.
- w966** Michel P et al. Short report: treatment of gastric ulcer with lansoprazole or ranitidine: a multicentre clinical trial. *Aliment Pharm Therap* 1994;8:119-22.
- w967** Capurso L et al. Lansoprazole in the treatment of peptic ulcer disease: A multicentre double-blind study. *Gastroenterol Int* 1995;8(3):125-32.
- w968** Hawkey CJ et al. Improved symptom relief and duodenal ulcer healing with lansoprazole, a new proton pump inhibitor, compared with ranitidine. *Gut* 1993;34(10):1458-62.
- w969** Lazzaroni M et al. Triple therapy with ranitidine or lansoprazole in the treatment of Helicobacter pylori-associated duodenal ulcer. *Am J Gastroenterol* 1997;92(4):649-52.
- w970** Bardhan KD et al. Rapid healing of gastric ulcers with lansoprazole. *Aliment Pharm Therap* 1994;8(2):215-20.
- w971** Vreer M et al. Modeling the cost-effectiveness of duodenal ulcer treatment with lansoprazole and ranitidine. *Journal of Research in Pharmaceutical Economics* 1999 9(4):43-61.
- w972** Fujino MA et al. Quality of peptic ulcer healing induced by lansoprazole and roxatidine. *J Clin Gastroenterol* 1995;20 Suppl 2:S44-6.
- w973** Imaeda, H., et al. (2011). Effect of lansoprazole versus roxatidine on prevention of bleeding and promotion of ulcer healing after endoscopic submucosal dissection for superficial gastric neoplasia. *J Gastroenterol* 46(11):1267-1272.
- w974** Bigard MA et al. Comparative efficacy of omeprazole and cimetidine in the treatment of duodenal ulcer in the acute stage. A French multicenter, controlled therapeutic trial. *Gastroen Clin Biol* 1987;11(11):753-7. [French]
- w975** Archambault AP et al. Omeprazole (20mg daily) versus cimetidine (1200mg daily) in duodenal ulcer healing and pain relief. *Gastroenterology* 1988;94(5 1):1130-4.
- w976** Wilairatana S et al. Omeprazole or cimetidine once daily for the treatment of duodenal ulcers? *J Gastroen Hepatol* 1989;4(Suppl.2):45-52.
- w977** Crowe JP et al. Symptom relief and duodenal ulcer healing with omeprazole or cimetidine. *Aliment Pharm Therap* 1989;3(1):83-91.
- w978** Pan S et al. Histological maturity of healed duodenal ulcer and ulcer recurrence after treatment with omeprazole or cimetidine. *J Gastroen Hepatol* 1994;9(Suppl.):584-7.
- w979** Kim NY et al. The effect of eradication of Helicobacter pylori upon the duodenal ulcer recurrence-a 24 month follow-up study. *Korean Journal of Internal Medicine* 1994;9(2):72-9.
- w980** Bate CM et al. Randomised, double blind comparison of omeprazole and cimetidine in the treatment of symptomatic gastric ulcer. *Gut* 1989;30:1323-8.
- w981** Lauritsen K et al. Effect of omeprazole and cimetidine on duodenal ulcer: A double-blind comparative trial. *New Engl J Med* 1985;312(15):958-61.
- w982** Wulff HR et al. Omeprazole and cimetidine in the treatment of ulcers of the body of the stomach: A double blind comparative trial. *Brit Med J* 1989;298(6674):645-7.
- w983** Dahlgren S et al. The effects of omeprazole and cimetidine on duodenal ulcer healing and the relief of symptoms. *Aliment Pharm Therap* 1988;2(6):483-92.
- w984** Lauritsen K et al. Omeprazole in the treatment of prepyloric ulcer: Review of the results of the danish omeprazole study group. *Scand J Gastroenterol* 1989;24(166)(Suppl.):54-7.
- w985** Popovic O et al. Omeprazole 20 mg o.m. vs. famotidine 40 mg h.s. in the treatment of duodenal ulcer. Multicenter double-blind randomized trial. *Gastroentero Arh*1990;9(1):26-34. [Serbian]
- w986** Lin C-K et al. Efficacy of omeprazole versus famotidine in the short-term treatment of gastric ulcer. *Chinese J Gastroenterol* 1994;11:272-78.
- w987** Esaki M et al. Effects of omeprazole and famotidine on fibroblast growth factor-2 during artificial gastric ulcer healing in humans. *Eur J Gastroen Hepat* 2002;14(4):365-9.
- w988** Delle Fave G et al. Omeprazole versus famotidine in the short-term treatment of duodenal ulcer disease. *Aliment Pharm Therap* 1992;6(4):469-78.
- w989** Kumar TR et al. Comparative study of omeprazole and famotidine in the treatment of duodenal ulcer. *Indian Journal of Gastroenterology* 1992;11(2):73-5
- w990** Misra SC et al. Omeprazole versus famotidine in the healing and relapse of duodenal ulcer. *Aliment Pharm Therap* 1993;7(4):443-9.
- w991** Yamaguchi Y et al. A prospective randomized trial of either famotidine or omeprazole for the prevention of bleeding after endoscopic mucosal resection and the healing of endoscopic mucosal resection-induced ulceration. *Aliment Pharmacol Ther* 2005;21(Suppl.2):111-5.
- w992** Ye BD et al. Omeprazole may be superior to famotidine in the management of iatrogenic ulcer after endoscopic mucosal resection: a prospective randomized controlled trial. *Alimentary Pharmacol Ther* 2006;24(5):837-43.
- w993** Tomita T et al. Prospective randomized controlled trial to compare the effects of omeprazole and famotidine in preventing delayed bleeding and promoting ulcer healing after endoscopic submucosal dissection. *J Gastroenterol Hepatol* 2012;27(9):1441-6.
- w994** Di Mario F et al. [Effects of H2 blockers and omeprazole on peptic secretion: a prospective, randomized study in duodenal ulcer subjects]. *Acta Gastro-ent Belg* 1993;56(2):223-8.
- w995** Goh KL et al. Helicobacter pylori eradication with short-term therapy leads to duodenal ulcer healing without the need for continued acid suppression therapy. *Eur J Gastroen Hepat* 1996;8(5):421-3.
- w996** Hsu CC et al. Famotidine versus omeprazole, in combination with amoxicillin and tinidazole, for eradication of Helicobacter pylori infection. *Eur J Gastroen Hepat* 2001;13(8):921-6.
- w997** Wang, K., et al. (1996). "Omeprazole plus amoxicillin versus triple therapy eradicates Helicobacter pylori in the Chinese with peptic ulcer disease." *Chung Hua i Hsueh Tsa Chih - Chinese Medical Journal* 57(3):184-190.
- w998** Hui W-M et al. Omeprazole and ranitidine in duodenal ulcer healing and subsequent relapse: A randomized double-blind study with weekly endoscopic assessment. *J Gastroen Hepatol* 1989;4(Suppl.):35-43.
- w999** Hui WM et al. Parietal cells in duodenal ulcer disease: a histochemical study of the effects of omeprazole and ranitidine on mitochondrial activities. *J Gastroen Hepatol* 1989;4(2):143-9.
- w1000** Marks IN et al. A comparison of omeprazole and ranitidine for duodenal ulcer in South African patients. A multi-racial study. *Digest Dis Sci* 1991;36(10):1395-400.
- w1001** Valenzuela JE et al. U.S. experience with omeprazole in duodenal ulcer. Multicenter double-blind comparative study with ranitidine. The Omeprazole DU Comparative Study Group. *Digest Dis Sci* 1991;36(6):761-8.
- w1002** Wan A et al. Effect of omeprazole and ranitidine on ulcer healing and relapse rates in patients with benign gastric ulcer. *New Engl J Med* 1989;320(2):69-75.
- w1003** Bergmann JF et al. Prognostic factors for duodenal ulcers healing. A ranitidine versus omeprazole controlled trial. *Presse Med* 1995;24(12):559-62. [French]
- w1004** Miszputen SJ et al. Comparative multicentric study between omeprazole and ranitidine in duodenal ulcer. *Gastroenterol Endo Digest* 1997;16(4):127-34. [Portugese]
- w1005** Lee J-S et al. Effect of omeprazole and ranitidine on ulcer healing and relief of symptom in patient with peptic ulcer. *J Korean Med Assoc* 1991;34(4):420-6. [Korean]

## References for trials listed in Webtables 1-7

- w1006** Classen M et al. Short-duration treatment of duodenal ulcer with omeprazole and ranitidine: Results of a multi-centre trial in Germany. *Deut Med Wochenschr* 1985;110(6):210-5. [German]
- w1007** Hotz J et al. Treatment of acute peptic gastroduodenal ulcer: omeprazole is superior to ranitidine especially in the early phase of ulcer healing. A prospective controlled randomized serial endoscopy study. *Leber Magen Darm* 1995;25(4):165-70. [German]
- w1008** Hallerback B et al. Quality of life in duodenal ulcer treatment: A comparison of omeprazole and ranitidine in acute and intermittent treatment. *Psychol Health Med* 1998;3(4):417-27.
- w1009** Arber N et al. A multicenter, double-blind, randomized controlled study of omeprazole versus ranitidine in the treatment of duodenal ulcer in Israel. *Israel J Med Sci* 1994;30(10):757-61.
- w1010** Al Karawi MA et al. Double-blind comparative study of omeprazole 20 mg daily and ranitidine 300 mg daily in the treatment of duodenal ulcer. *Saudi Med J* 1996;17(5):576-80.
- w1011** Barbara L et al. Omeprazole vs. ranitidine in the short-term treatment of duodenal ulcer: An Italian multicenter study. *Hepato-Gastroenterol* 1987;34(5):229-32.
- w1012** Ahmed W et al. Omeprazole vs ranitidine in the healing of duodenal ulcer. *J Pakistan Med Ass* 1993;43(6):111-2.
- w1013** Bardhan KD et al. A comparison of two different doses of omeprazole versus ranitidine in treatment of duodenal ulcers. *J Clin Gastroenterol* 1986;8(4):408-13.
- w1014** Lysy J et al. Effect of duodenal ulcer healing induced by omeprazole and ranitidine on the generation of gastroduodenal eicosanoids, platelet-activating factor, pepsinogen A, and gastrin in duodenal ulcer patients. *Scand J Gastroenterol* 1992;27(1):13-9.
- w1015** Chelvam P et al. Omeprazole compared with ranitidine once daily in the treatment of duodenal ulcer. *J Gastroen Hepatol* 1989;4(Suppl.2):53-61.
- w1016** Archimandritis A et al. Triple therapy eradicated *H. pylori* equally in patients pretreated with omeprazole or ranitidine. A 12-month follow-up. *J Clin Gastroenterol* 1995;20(1):12-6.
- w1017** Italian Cooperative Group on Omeprazole. Omeprazole 20mg uid and ranitidine 150mg bid in the treatment of benign gastric ulcer. *Hepato-gastroenterol* 1991;38(5):400-3.
- w1018** Zaterka S et al. Treatment of duodenal ulcer with omeprazole or ranitidine in a Brazilian population: A multicenter double-blind, parallel group study. *Am J Gastroenterol* 1993;88(3):397-401.
- w1019** Crowe JP et al. Speed of symptom relief and predictability of healing in duodenal ulcer disease - A comparison of omeprazole 20mg with ranitidine 300mg daily: Omeprazole 40mg daily provides additional benefit in patients with an incomplete response. *Eur J Clin Res* 1994;5:141-50.
- w1020** Delchier JC et al. Double-blind multicentre comparison of omeprazole 20mg once daily versus ranitidine 150mg twice daily in the treatment of cimetidine or ranitidine resistant duodenal ulcers. *Gut* 1989;30(9):1173-8.
- w1021** Choi KW et al. A double-blind, randomized, parallel group study of omeprazole and ranitidine in Korean patients with gastric ulcer. *J Gastroen Hepatol* 1994;9(2):118-23.
- w1022** Catalano F et al. Omeprazole vs. ranitidine in short-term treatment of *Helicobacter pylori* positive duodenal ulcer patients. *Ital J Gastroenterol* 1991;23(1):9-11.
- w1023** Pare P et al. Healing of benign gastric and prepyloric ulcers: A prospective, endoscopy-controlled, randomized, double-blind, Canadian multicentre study of omeprazole 20 and 40mg daily and ranitidine 150 mg twice a day. *Can J Gastroenterol* 1990;4(1):7-12.
- w1024** Mulder CJ et al. Omeprazole (20mg o.m.) versus ranitidine (150mg b.d.) in duodenal ulcer healing and pain relief. *Aliment Pharm Therap* 1989;3(5):445-51.
- w1025** Rossini FP et al. Histological aspects and healing rates of gastric ulcers treated with omeprazole 20mg once daily or ranitidine 150mg B.I.D. *Panminerva Medica* 1989;31(2):94-6. [Italian]
- w1026** Wang CY et al. Double-blind comparison of omeprazole 20mg OM and ranitidine 300mg NOCTE in duodenal ulcer: a Taiwan multi-centre study. *J Gastroen Hepatol* 1992;7(6):572-6.
- w1027** McFarland RJ et al. Omeprazole provides quicker symptom relief and duodenal ulcer healing than ranitidine. *Gastroenterology* 1990;98(2):278-83.
- w1028** Classen M et al. Healing rates following omeprazole and ranitidine treatment of gastric ulcer. Results of a German multicenter study. *Deut Med Wochenschr* 1985;110(16):628-33. [German]
- w1029** Glise H et al. Two and four weeks' treatment for duodenal ulcer. Symptom relief and clinical remission comparing omeprazole and ranitidine. *Scand J Gastroentero* 1991;26(2):137-45.
- w1030** Sonnenberg A et al. The effect of antibiotic therapy on bleeding from duodenal ulcer. *Am J Gastroenterol* 1999;94(4):950-4.
- w1031** Diaz Rubio M et al. Comparative multicentric study of omeprazole versus ranitidine in the treatment of duodenal ulcer. *Revista Espanola de Enfermedades Digestivas* 1991;80(1):12-6. [Spanish]
- w1032** Parodi MC et al. Effects of omeprazole on gastric mucus secretion, tissue prostaglandin synthesis, and acid inhibition in patients with duodenal ulcer: Comparison with ranitidine treatment. *Curr Ther Res - Clin Exp* 1992;52(1):13-23.
- w1033** Cataldo MG et al. Treatment of patients with duodenal ulcer positive for *Helicobacter pylori* infection: Ranitidine or omeprazole associated with colloidal bismuth subcitrate plus amoxicillin. *Curr Ther Res Clin E* 1996;57(3):168-74.
- w1034** Kager L et al. The effect of omeprazole and ranitidine on ulcer healing, relief of symptoms, and incidence of adverse events in the treatment of duodenal ulcer patients. *Hepato-Gastroenterol* 1991;38(4):287-90.
- w1035** Sonnenberg A et al. Cost savings in duodenal ulcer therapy through *Helicobacter pylori* eradication compared with conventional therapies: results of a randomized, double-blind, multicenter trial. *Gastrointestinal Utilization Trial Study Group. Arch Intern Med* 1998;158(8):852-60.
- w1036** Tulassay Z et al. Omeprazole versus ranitidine in the treatment of resistant duodenal ulcer. *Gut* 1992;33(6):863.
- w1037** Michopoulos S et al. Randomized study comparing omeprazole with ranitidine as anti-secretory agents combined in quadruple second-line *Helicobacter pylori* eradication regimens. *Aliment Pharm Therap* 2000;14(6):737-44.
- w1038** Cooperative study group. Double blind comparative study of omeprazole and ranitidine in patients with duodenal or gastric ulcer: a multicentre trial. *Gut* 1990;31(6):653-6.
- w1039** Russo A et al. Histologic patterns of omeprazole and nizatidine-healed duodenal ulcers:accuracy of endoscopic diagnosis. *Scand J Gastroentero* 1994;206(Suppl.):20-4.
- w1040** Brummer R-J et al. Effect of nizatidine 300mg at night and omeprazole 20mg in the morning on 24-hour intragastric pH and bacterial overgrowth in patients with acute duodenal ulcer. *Digest Dis Sci* 1996;41(10):2048-54.
- w1041** Nakashima S et al. Usefulness of anti-ulcer drugs for the prevention and treatment of peptic ulcers induced by low doses of aspirin. *World J Gastroentero* 2009;15(6):727-31.
- w1042** Sasakii M et al. The therapeutic effect of proton pump inhibitors on *Helicobacter pylori*-positive gastric ulcers. *J Pharm Pharmacol* 1999;51(7):825-30.
- w1043** Noh MH et al. Analysis of preventive effect of PPI alone, PPI plus cytoprotective agents and H2RA plus cytoprotective agents on bleeding after endoscopic submucosal dissection: A prospective comparative randomized trial. *Gastrointestinal Endoscopy*. 2013;71(4):AB252-AB3.
- w1044** Kang, KJ et al. Comparison of a proton pump inhibitor and a H2 receptor antagonist for management of iatrogenic ulcers after endoscopic submucosal dissection of gastric neoplasms. *J Gastroen Hepatol* 2011; 26:278.
- w1045** Jeon TJ. Pantoprazole may be superior to famotidine in the ulcer healing after endoscopic submucosal dissection: A prospective randomized controlled trial. *Dig*. 2010;22(4):A45.
- w1046** Oh TH et al. Pantoprazole may be superior to famotidine in the ulcer healing after endoscopic submucosal dissection: A prospective randomized controlled trial. *Digestion* 2010;81(3):162.
- w1047** Seo JY et al. Efficacy of famotidine or pantoprazole for the prevention of delayed bleeding and healing of endoscopic submucosal dissection-induced ulcer: A prospective randomized trial. *Gastroenterology* 2011;(1):S573.
- w1048** Papp J et al. Evaluation of the efficacy of pantoprazole and ranitidine in the treatment of duodenal ulcer. Result of an international multicenter double blind study. *Orvosi Hetilap* 1997;138(45):2863-6. [Hungarian]
- w1049** Schepp W et al. Pantoprazole and ranitidine in the treatment of acute duodenal ulcer. A multicentre study. *Scand J Gastroentero* 1995;30(6):511-4.
- w1050** Cremer M et al. A double-blind study of pantoprazole and ranitidine in treatment of acute duodenal ulcer. A multicenter trial. *European Pantoprazole Study Group. Digest Dis Sci* 1995;40(6):1360-4.
- w1051** Chen TS et al. The efficacy of the third pump inhibitor-pantoprazole-in the short-term treatment of Chinese patients with duodenal ulcer. *Hepato-gastroenterol* 1999;46(28):2372-8.
- w1052** Meneghelli UG et al. Pantoprazole versus ranitidine in the treatment of duodenal ulcer: a multicenter study in Brazil. *Am J Gastroenterol* 2000;95(1):62-6.
- w1053** Judmaier G et al. Comparison of pantoprazole and ranitidine in the treatment of acute duodenal ulcer. *Aliment Pharm Therap* 1994;8(1):81-6.
- w1054** Fric P et al. Treatment of duodenal ulcer with pantoprazole. A multicenter study. *Casopis Lekaru Ceskych* 1996;135(23):758-61. [Czech]
- w1055** Hotz J et al. Pantoprazole is superior to ranitidine in the treatment of acute gastric ulcer. *Scand J Gastroentero* 1995;30(2):111-5.
- w1056** van Rensburg CJ et al. Improved duodenal ulcer healing with pantoprazole compared with ranitidine: A multicenter study. *Eur J Gastroen Hepat* 1994;6(8):739-43.
- w1057** Dibildox M et al. Superiority of pantoprazole over ranitidine in the treatment of duodenal ulcer. Mexican clinical experience. Mexican Study Group of Pantoprazole in Duodenal Ulcer. *Rev Gastroenterol Mex* 1996;61(3):193-8. [Spanish]
- w1058** Saigenji K et al. Clinical evaluation of Pariet 10 mg tablets in patients with gastric ulcer diseases. *Jpn Pharmacol & Ther* 2002;30(9):675-93. [Japanese]
- w1059** Breiter JR et al. Rabeprazole is superior to ranitidine in the management of active duodenal ulcer disease: Results of a double-blind, randomized North American study. *Am J Gastroenterol* 2000;95(4):936-42.
- w1060** Takeuchi N et al. Gastric ulcer healing after treatment of endoscopic submucosal dissection in Japanese: Comparison of H receptor antagonist and proton pump inhibitor administration. *J Biochem Nutrition* 2011;49(3):216-221.
- w1061** Bai Y et al. Intravenous Esomeprazole for Prevention of Peptic Ulcer Rebleeding: A Randomized Trial in Chinese Patients. *Adv Ther* 2015;32(11):1160-76.
- w1062** Ashida K et al. Hemostatic effect of lansoprazole (AG-1749) injection in patients with upper gastrointestinal hemorrhage - a multicenter, randomized double-blind, clinical trial *Jpn Pharmacol & Ther* 2007;35(5):503-517. [Japanese]
- w1063** Chua RT et al. Intravenous omeprazole prevents rebleeding in peptic ulcer patients with a non-bleeding visible vessel: A preliminary report of a randomized controlled study. *Chinese Med J-Peking* 1996;57:139-45.
- w1064** Lin HJ et al. Role of intravenous omeprazole in patients with high-risk peptic ulcer bleeding after successful endoscopic epinephrine injection: a prospective randomized comparative trial. *Am J Gastroenterol* 2006;101(3):500-5.
- w1065** Lin HJ et al. A prospective randomized comparative trial showing that omeprazole prevents rebleeding in patients with bleeding peptic ulcer after successful endoscopic therapy. *Arch Intern Med* 1998;158(1):54-8.

## References for trials listed in Webtables 1-7

- w1066** Fasseas P et al. Omeprazole versus ranitidine in the medical treatment of acute upper gastrointestinal bleeding: assessment by early repeat endoscopy. *Int J Clin Pract* 2001;55(10):661-4.
- w1067** Artal A et al. Evaluation of intravenous ranitidine and omeprazole effect on the 24-hour gastric pH-metry in duodenal ulcer hemorrhage. *Rev Esp Enferm Dig* 1996;88(3):191-6. [Spanish]
- w1068** Lanas A et al. Effect of parenteral omeprazole and ranitidine on gastric pH and the outcome of bleeding peptic ulcer. *J Clin Gastroenterol* 1995;21(2):103-6.
- w1069** Sheu BS et al. Impact of intravenous omeprazole on *Helicobacter Pylori* eradication by triple therapy in patients with peptic ulcer bleeding. *Aliment Pharm Therap* 2002;16(1):137-43.
- w1070** Cardi M et al. Intravenous omeprazole versus intravenous ranitidine in the treatment of hemorrhagic duodenal ulcer: a prospective randomized study. *Ann Chir* 1997;51(2):136-9. [French]
- w1071** Coraggio F et al. Somatostatin in the prevention of recurrent bleeding after endoscopic haemostasis of peptic ulcer haemorrhage: a preliminary report. *Eur J Gastroen Hepat* 1998;10(8):673-6.
- w1072** Orti E et al. Is upper gastrointestinal bleeding evolution influenced by the used antisecretory? *Rev Esp Enferm Dig* 1995;87(6):427-30. [Spanish]
- w1073** Villanueva C et al. Omeprazole versus ranitidine as adjunct therapy to endoscopic injection in actively bleeding ulcers: a prospective and randomized study. *Endoscopy* 1995;27(4):308-12.
- w1074** Labenz J et al. Efficacy of primed infusions with high dose ranitidine and omeprazole to maintain high intragastric pH in patients with peptic ulcer bleeding: a prospective randomised controlled study. *Gut* 1997;40(1):36-41.
- w1075** Hsu PI et al. Intravenous pantoprazole versus ranitidine for prevention of rebleeding after endoscopic hemostasis of bleeding peptic ulcers. *World J Gastroenterol* 2004;10(24):3666-9.
- w1076** van Rensburg C et al. Clinical trial: intravenous pantoprazole vs ranitidine for the prevention of peptic ulcer rebleeding: a multicentre, multinational, randomized trial. *Aliment Pharm Therap* 2009;29:497-507.
- w1077** Jensen DM et al. Continuous infusion of pantoprazole versus ranitidine for prevention of ulcer rebleeding: A U.S. multicenter randomized, double-blind study. *Am J Gastroenterol* 2006;101(9):1991-9.
- w1078** Gashi Z et al. The efficacy of PPI after endoscopic hemostasis in patients with bleeding peptic ulcer and role of *Helicobacter pylori*. *Medicinski Arhiv* 2012;66(4):236-9.
- w1079** Yildiz C et al. The effects of misoprostol and famotidine on gastric injury caused by long term nonsteroid anti-inflammatory drug usage. *Turkish Journal of Gastroenterology* 1996;7(3):222-7. [Turkish]
- w1080** Yamao, J-I et al. Assessing the efficacy of famotidine and rebamipide in the treatment of gastric mucosal lesions in patients receiving long-term NSAID therapy (FORCE - Famotidine or rebamipide in comparison by endoscopy). *J Gastroenterol* 2006;41(12):1178-1185.
- w1081** Lauritsen K et al. Enprostil and ranitidine in prevention of duodenal ulcer relapse: one year double blind comparative trial. *Brit Med J Clin Res Ed* 1987;294(6577):932-4.
- w1082** Bardhan KD et al. A comparison of low-dose maintenance treatment with enprostil against ranitidine in the prevention of duodenal ulcer recurrence. *Aliment Pharm Therap* 1989;3(5):489-97.
- w1083** Heijerman HGM et al. Ranitidine compared with the dimethylprostaglandin E2 analogue enprostil as adjunct to pancreatic enzyme replacement in adult cystic fibrosis. *Scand J Gastroenterol Suppl* 1990;25(178):26-31.
- w1084** Raskin JB et al. Misoprostol and ranitidine in the prevention of NSAID-induced ulcers: a prospective, double-blind, multicenter study. *Am J Gastroenterol* 1996;91(2):223-7.
- w1085** Valentini M et al. Nonsteroidal antiinflammatory drugs for cancer pain: comparison between misoprostol and ranitidine in prevention of upper gastrointestinal damage. *J Clin Oncol* 1995;13(10):2637-42.
- w1086** Bianchi Porro G et al. Double-blind, double-dummy endoscopic comparison of the mucosal protective effects of misoprostol versus ranitidine on naproxen-induced mucosal injury to the stomach and duodenum in rheumatic patients. *Am J Gastroenterol* 1997;92(4):663-7.
- w1087** Rampal P et al. Rioprostil and ranitidine in the prevention of duodenal ulcer relapse. *Scand J Gastroenterol* 1989;24(suppl.164):146-51.
- w1088** Businger JA et al. Rioprostil, a new prostaglandin E1 analogue, in the once-daily treatment for the prevention of duodenal ulcer recurrence: A comparison with ranitidine. *Scand J Gastroenterol* 1989;24(164)(Suppl.):152-60.
- w1089** Frexinos J et al. Efficacy and tolerability of enprostil in the treatment of duodenal ulcer. Comparison with cimetidine. *Gastroen Clin Biol* 1989;13(2):188-92. [French]
- w1090** Winters L et al. Comparison of enprostil and cimetidine in active duodenal ulcer disease: Summary of pooled European studies. *Am J Med* 1986;81(2A):69-74.
- w1091** Jazrawi RP et al. Enprostil, a prostaglandin E2 analogue, in the treatment of duodenal ulcer; a multicentre \* comparison with cimetidine. *Aliment Pharm Therap* 1988;2(4):353-9.
- w1092** Carling L et al. Enprostil and cimetidine: comparative efficacy and safety in patients with duodenal ulcer. *Scand J Gastroenterol* 1987;22(3):325-31.
- w1093** Unge P et al. The comparative efficacy and safety of enprostil and cimetidine in the treatment of gastric ulcer. *Opus Med* 1989;34(3):61-4.
- w1094** Villalobos Perez JJ et al. Comparative study of enprostil versus cimetidine in patients with duodenal ulcer during 6 weeks of treatment. *Revista de Gastroenterologia de Mexico* 1987;52(2):95-8. [Spanish]
- w1095** Wang BE et al. A multiclinic double-blind, comparative clinical trial on misoprostol in the treatment of duodenal ulcer. *Chinese Journal of Internal Medicine* 1991;254:30(4):226-9. [Chinese]
- w1096** Dajani EZ et al. Misoprostol in the treatment of duodenal ulcers in the People's Republic of China: A comparative, double-blind, multicenter study. *Drug Develop Res* 1992;27(4):415-23.
- w1097** Aenishanslin W et al. Misoprostol and cimetidine in treatment of duodenal ulcer. *Schweiz Med Wschr* 1985;115(36):1225-31. [German]
- w1098** Rachmiewitz D et al. A multicenter international controlled comparison of two dosage regimens of misoprostol with cimetidine in treatment of gastric ulcer in outpatients. *Digest Dis Sci* 1986;31(Suppl.2):75S-80S.
- w1099** Nicholson PA. A multicenter international controlled comparison of two dosage regimens of misoprostol and cimetidine in the treatment of duodenal ulcer in out-patients. *Digest Dis Sci* 1985;30(Suppl.):71-7.
- w1100** Baccaro JC et al. Misoprostol and cimetidine in the treatment of active duodenal ulcer. Multicenter, double-blind, clinico-endoscopic study. The Argentine experience. *Acta Gastroenterol Latino* 1987;17(3):235-40. [Spanish]
- w1101** Fich A et al. Comparison of misoprostol and cimetidine in the treatment of gastric ulcer. *Israel J Med Sci* 1985;21(12):968-72.
- w1102** Fich A et al. Comparison of misoprostol and cimetidine in the treatment of duodenal ulcer. *Israel J Med Sci* 1985;21(2):102-6.
- w1103** Petersen HD et al. Prostaglandin E1 (misoprostol) versus cimetidine in the treatment of duodenal ulcer. A controlled clinical trial. *Ugeskrift for Laeger* 1987;149(15):969-71. [Danish]
- w1104** O'Keefe SJ et al. Misoprostol, a synthetic prostaglandin E1 analogue, in the treatment of duodenal ulcers. A double-blind, cimetidine-controlled trial. *S Afr Med J* 1985;9:321-4.
- w1105** Bianchi Porro G et al. Rioprostil in the short-term treatment of duodenal ulcer: a multicentre double-blind trial vs. cimetidine. *Scand J Gastroenterol* 1989;164(Suppl.):219-23.
- w1106** Kim YJ et al. Rebamipide may be comparable to H2 receptor antagonist in healing iatrogenic gastric ulcers created by endoscopic mucosal resection: a prospective randomized pilot study. *J Korean Med Sci* 2010;25(4):583-8.
- w1107** Lartigue S et al. Effect of enprostil on duodenal ulcer healing and ulcer recurrence. Comparison with ranitidine. *Gastroen Clin Biol* 1994;18(6-7):617-22. [French]
- w1108** Bianchi Porro G et al. Enprostil vs ranitidine in the short term treatment of benign gastric ulcer. A double-blind placebo-controlled trial. *Drug Invest* 1992;4(2):143-8.
- w1109** Bunce I et al. Platelet function in patients receiving enprostil. *Am J Med* 1986;81(2A):85-8.
- w1110** Bardhan KD et al. A comparison of enprostil and ranitidine in treatment of duodenal ulcer. *J Clin Gastroenterol* 1988;10(2):137-42.
- w1111** Bardhan KD et al. Gastric ulcer healing: A comparison of enprostil versus ranitidine. *J Clin Gastroenterol* 1991;13(2):157-62.
- w1112** Dammann HG et al. Comparative clinical trial of enprostil and ranitidine in the treatment of gastric ulcer. *Am J Med* 1986;81(2A):80-4.
- w1113** Morgan AG et al. A comparison between enprostil and ranitidine in the management of gastric ulceration. *Aliment Pharm Therap* 1990;4(6):635-41.
- w1114** Mackinnon M et al. Enprostil and ranitidine: comparative efficacy and safety in patients with duodenal ulcer. *Aust NZ J Med* 1987;17(3):316-20.
- w1115** Lauritsen K et al. Enprostil and ranitidine in duodenal ulcer healing: double blind comparative trial. *Brit Med J Clin Res Ed* 1986;292(6524):864-6.
- w1116** Goldin E et al. Comparison of misoprostol and ranitidine in the treatment of duodenal ulcer. *Israel J Med Sci* 1988;24(6):282-5.
- w1117** Simjee AE et al. A comparative study of misoprostol and ranitidine in the healing of duodenal ulcers. A double-blind controlled trial. *S Afr Med J* 1987;72:15-7.
- w1118** Gonvers J-J et al. Gastric ulcer: a double blind comparison of 800mcg misoprostol versus 300mg ranitidine. *Hepato-gastroenterol* 1987; 34(5): 233-5.
- w1119** Lavignolle A et al. Rioprostil vs. ranitidine in duodenal ulcer healing: a double-blind multicentre trial. *Scand J Gastroenterol* 1989;24(suppl.164):194-7.
- w1120** Lauritsen K et al. Rioprostil and ranitidine in the treatment of prepyloric gastric ulcer. A double-blind comparative trial. *Scand J Gastroenterol* 1989;24(3):368-72.
- w1121** Dammann HG et al. A single evening dose of rioprostil, 600 micrograms, in the treatment of acute duodenal ulcers. *Scand J Gastroenterol* 1989;24(164)(Suppl.):215-8.
- w1122** Quinton A et al. Treatment of benign gastric ulcer: A comparative clinical trial of rioprostil and ranitidine. *Scand J Gastroenterol* 1989;24(164)(Suppl.):178-83.
- w1123** Dammann HG et al. Rioprostil 600 micrograms nocte: high duodenal ulcer healing rates and low incidence of side effects. *Adv Prostag Thromb L* 1987;17A:303-6.
- w1124** Coremans G et al. Efficacy and safety of rioprostil, 300 micrograms b.d., in the treatment of duodenal ulcer: a double-blind, controlled multicentre clinical study vs. ranitidine. *Scand J Gastroenterol* 1989;164(Suppl.):198-205.
- w1125** Businger JA et al. Rioprostil, a new prostaglandin E1 analogue, in the once-daily treatment of acute duodenal ulcer: a comparison with ranitidine. *Scand J Gastroenterol* 1989;164(Suppl.):161-7.
- w1126** Rutgeerts P et al. Efficacy and safety of rioprostil, 300 micrograms b.d., in the treatment of gastric ulcer: a comparison vs. ranitidine, 150mg b.d. in a randomized multicentre study. *Scand J Gastroenterol* 1989;164(Suppl.):184-90.
- w1127** Yang CW et al. Prevention of post-transplant peptic ulcer by misoprostol. *Nephron* 1996;74(1):131-5.
- w1128** Yoshida N et al. Management of recurrence of symptoms of gastroesophageal reflux disease: synergistic effect of rebamipide with 15 mg lansoprazole. *Digest Dis Sci* 2010;55(12):3393-8.

## References for trials listed in Webtables 1-7

- w1129** Mizukami K et al. Aspirin-induced small bowel injuries and the preventive effect of rebamipide. *World J Gastroenterology* 2011;17(46):5117-22.
- w1130** Murata H et al. Combination of enprostil and cimetidine is more effective than cimetidine alone in treating gastric ulcer: prospective multicenter randomized controlled trial. *Hepato-gastroenterol* 2005;52(66):1925-9.
- w1131** Saita H et al. Combination therapy with lansoprazole, amoxicillin, and rebamipide for cure of *Helicobacter pylori* infection and histological gastritis in gastric ulcer patients. *Jpn Arch Int Med* 1996;43(2):15-25. [Japanese]
- w1132** Jang JS et al. Interim analysis of preventive effect of PPI alone, PPI plus rebamipide and H2RA plus rebamipide on bleeding from after endoscopic submucosal dissection : A prospective randomized controlled trial. *Gastrointestinal Endoscopy* 2012;1: AB236-AB7.
- w1133** Araki H et al. Combination of proton pump inhibitor and rebamipide, a free radical scavenger, promotes artificial ulcer healing after endoscopic submucosal dissection with dissection size >40 mm. *J Clin Biochem and Nutri* 2012;51(3):185-188.
- w1134** Kobayashi M et al. Contributing factors to gastric ulcer healing after endoscopic submucosal dissection including the promoting effect of rebamipide. *Dig Dis Sci* 2012;57(1):119-126.
- w1135** Yilmaz S et al. Does adding misoprostol to standard intravenous proton pump inhibitor protocol improve the outcome of aspirin/NSAID-induced upper gastrointestinal bleeding?: a randomized prospective study. *Digest Dis Sci* 2007;52(1):110-8.
